# Supplementary material for: Direct glia-to-neuron transdifferentiation gives rise to a pair of male-specific neurons that ensure nimble male mating
Source: eLife. 2020 Nov 3;9:e48361. doi: 10.7554/eLife.48361 (PMC7609048; doi:10.7554/eLife.48361)
Supplement: Figure 3—figure supplement 2—source data 1. [file elife-48361-fig3-figsupp2-data1.xlsx]

## Sheet: Fig. 3 S1 - A
Blue higlight	P-value considered in graphs
Figure 3 S1 - A						MCM				Fisher's exact test (two-tailed)
Strain	Genotype	Stage	Temperature (℃)	Reporter scored	Sex	2 cells	1 cell	0 cells	N (total cells)	P-value 2 cells	P-value 1 cell	P-value 0 cells	Comparison
CHL58	drpIs3 [lin-48::tdTomato] I; otIs291 [rab-3p::2xNLS::yfp + rol-6(su1006)], him-5(e1490) V	late L4 - 1 day adult	20	rab-3p::yfp	male	0	78	0	78	-	-	-	-
CHL59	drpIs3 [lin-48p::tdTomato] I; dpy-17(e164) III; otIs291 [rab-3p::2xNLS::yfp + rol-6(su1006)], him-5(e1490) V	late L4 - 1 day adult	20	rab-3p::yfp	male	1	91	0	92	1	1	1	wt vs dpy-17
CHL60	drpIs3 [lin-48p::tdTomato] I; ced-4(n1162), dpy-17(e164) III; otIs291 [rab-3p::2xNLS::YFP + rol-6(su1006)], him-5(e1490) V	late L4 - 1 day adult	20	rab-3p::yfp	male	0	80	0	80	1	1	1	wt vs ced-4;dpy-17
										1	1	1	dpy-17 vs ced-4;dpy-17
						PVDR				Fisher's exact test (two-tailed)
Strain	Genotype	Stage	Temperature (℃)	Reporter scored	Sex	2 cells	1 cell	0 cells	N (total cells)	P-value 2 cells	P-value 1 cell	P-value 0 cells	Comparison
CHL58	drpIs3 [lin-48::tdTomato] I; otIs291 [rab-3p::2xNLS::yfp + rol-6(su1006)], him-5(e1490) V	late L4 - 1 day adult	20	rab-3p::yfp	male	0	80	0	80	-	-	-	-
CHL60	drpIs3 [lin-48p::tdTomato] I; ced-4(n1162), dpy-17(e164) III; otIs291 [rab-3p::2xNLS::YFP + rol-6(su1006)], him-5(e1490) V	late L4 - 1 day adult	20	rab-3p::yfp	male	74	0	0	74	<0.0001	<0.0001	1	male wt vs ced-4; dpy-17
CHL58	drpIs3 [lin-48::tdTomato] I; otIs291 [rab-3p::2xNLS::yfp + rol-6(su1006)], him-5(e1490) V	late L4 - 1 day adult	20	rab-3p::yfp	hermaphrodite	0	32	0	32	<0.0001	<0.0001	1	hermaphrodite wt vs ced-4;dpy-17
CHL60	drpIs3 [lin-48p::tdTomato] I; ced-4(n1162), dpy-17(e164) III; otIs291 [rab-3p::2xNLS::YFP + rol-6(su1006)], him-5(e1490) V	late L4 - 1 day adult	20	rab-3p::yfp	hermaphrodite	166	0	0	166	1	1	1	male vs hermaphrodite ced-4;dpy-17
						PHD				Fisher's exact test (two-tailed)
Strain	Genotype	Stage	Temperature (℃)	Reporter scored	Sex	2 cells	1 cell	0 cells	N (total cells)	P-value 2 cells	P-value 1 cell	P-value 0 cells	Comparison
CHL58	drpIs3 [lin-48::tdTomato] I; otIs291 [rab-3p::2xNLS::yfp + rol-6(su1006)], him-5(e1490) V	late L4 - 1 day adult	20	rab-3p::yfp	male	10	68	0	78	-	-	-	-
CHL59	drpIs3 [lin-48p::tdTomato] I; dpy-17(e164) III; otIs291 [rab-3p::2xNLS::yfp + rol-6(su1006)], him-5(e1490) V	late L4 - 1 day adult	20	rab-3p::yfp	male	17	75	0	92	0.4008	0.4008	1	wt vs dpy-17
CHL60	drpIs3 [lin-48p::tdTomato] I; ced-4(n1162), dpy-17(e164) III; otIs291 [rab-3p::2xNLS::YFP + rol-6(su1006)], him-5(e1490) V	late L4 - 1 day adult	20	rab-3p::yfp	male	19	61	0	80	0.1	0.1	1	wt vs ced-4;dpy-17
										0.4543	0.4543	1	dpy-17 vs ced-4;dpy-17

## Sheet: Fig. 3 S1 - B
Figure 3 S1 - B						PHD
Strain	Genotype	Stage	Temperature (℃)	Reporter scored	Sex	2 cells	1 cell	0 cells	N (total cells)
CHL56	drpIs3 [lin-48::tdTomato] I; him-5(e1490) V	late L3	20	lin-48p::tdTomato	male	0	66	0	66
CHL56	drpIs3 [lin-48::tdTomato] I; him-5(e1490) V	early L4	20	lin-48p::tdTomato	male	2	46	1	48
CHL56	drpIs3 [lin-48::tdTomato] I; him-5(e1490) V	mid L4	20	lin-48p::tdTomato	male	4	48	4	56
CHL56	drpIs3 [lin-48::tdTomato] I; him-5(e1490) V	late L4	20	lin-48p::tdTomato	male	4	42	0	46
CHL56	drpIs3 [lin-48::tdTomato] I; him-5(e1490) V	adult	20	lin-48p::tdTomato	male	7	64	3	74

## Sheet: Fig. 3 S1 - C
Figure 3 S1 - C						PHD
Strain	Genotype	Stage	Temperature (℃)	Reporter scored	Sex	2 cells	1 cell	0 cells	N (total cells)
CHL61	drpIs3 [lin-48p::tdTomato] I; him-5(e1490)V; drpIs1 [grl-2p::GFP, dpy-5(+)] X	late L3	20	grl-2p::gfp	male	0	30	0	30
CHL61	drpIs3 [lin-48p::tdTomato] I; him-5(e1490)V; drpIs1 [grl-2p::GFP, dpy-5(+)] X	early L4	20	grl-2p::gfp	male	6	45	0	51
CHL61	drpIs3 [lin-48p::tdTomato] I; him-5(e1490)V; drpIs1 [grl-2p::GFP, dpy-5(+)] X	mid L4	20	grl-2p::gfp	male	5	59	0	64
CHL61	drpIs3 [lin-48p::tdTomato] I; him-5(e1490)V; drpIs1 [grl-2p::GFP, dpy-5(+)] X	late L4	20	grl-2p::gfp	male	9	192	3	204
CHL61	drpIs3 [lin-48p::tdTomato] I; him-5(e1490)V; drpIs1 [grl-2p::GFP, dpy-5(+)] X	adult	20	grl-2p::gfp	male	3	30	12	45
Notes	lin-48::tdTomato was used to label PHD and only lin-48::tdTomato + cells were scored

## Sheet: Fig. 3 S1 - D
Figure 3 S1 - D						PHD
Strain	Genotype	Stage	Temperature (℃)	Reporter scored	Sex	2 cells	1 cell	0 cells	N (total cells)
CHL58	drpIs3 [lin-48p::tdTomato] I; otIs291 [rab-3p::2xNLS::YFP + rol-6(su1006)], him-5(e1490) V	late L3	20	rab-3p::yfp	male	0	0	30	30
CHL58	drpIs3 [lin-48p::tdTomato] I; otIs291 [rab-3p::2xNLS::YFP + rol-6(su1006)], him-5(e1490) V	early L4	20	rab-3p::yfp	male	0	0	20	20
CHL58	drpIs3 [lin-48p::tdTomato] I; otIs291 [rab-3p::2xNLS::YFP + rol-6(su1006)], him-5(e1490) V	mid L4	20	rab-3p::yfp	male	0	26	6	32
CHL58	drpIs3 [lin-48p::tdTomato] I; otIs291 [rab-3p::2xNLS::YFP + rol-6(su1006)], him-5(e1490) V	late L4	20	rab-3p::yfp	male	1	27	0	28
CHL58	drpIs3 [lin-48p::tdTomato] I; otIs291 [rab-3p::2xNLS::YFP + rol-6(su1006)], him-5(e1490) V	adult	20	rab-3p::yfp	male	7	63	1	71
Notes	lin-48::tdTomato was used to label PHD and only lin-48::tdTomato + cells were scored

## Sheet: Fig. 3 S1 - E
Figure 3 S1 - E						PHD
Strain	Genotype	Stage	Temperature (℃)	Reporter scored	Sex	2 cells	1 cell	0 cells	N (total cells)
CHL63	drpIs3 [lin-48p::tdTomato] I; him-5(e1490) V; vsIs48 [unc-17::GFP] X	late L3	20	unc-17p::gfp	male	0	0	30	30
CHL63	drpIs3 [lin-48p::tdTomato] I; him-5(e1490) V; vsIs48 [unc-17::GFP] X	early L4	20	unc-17p::gfp	male	0	0	69	69
CHL63	drpIs3 [lin-48p::tdTomato] I; him-5(e1490) V; vsIs48 [unc-17::GFP] X	mid L4	20	unc-17p::gfp	male	2	30	43	75
CHL63	drpIs3 [lin-48p::tdTomato] I; him-5(e1490) V; vsIs48 [unc-17::GFP] X	late L4	20	unc-17p::gfp	male	2	24	5	31
CHL63	drpIs3 [lin-48p::tdTomato] I; him-5(e1490) V; vsIs48 [unc-17::GFP] X	adult	20	unc-17p::gfp	male	8	74	0	82
Notes	lin-48::tdTomato was used to label PHD and only lin-48::tdTomato + cells were scored

## Sheet: Fig. 3 S1 F
Figure 3 S1 - F						PHD
Strain	Genotype	Stage	Temperature (℃)	Reporter scored	Sex	2 cells	1 cell	0 cells	N (total cells)
CHL64	drpIs3 [lin-48p::tdTomato] I; inIs179 [ida-1p::GFP] II; him-5(e1490)V	late L3	20	ida-1p::gfp	male	0	0	30	30
CHL64	drpIs3 [lin-48p::tdTomato] I; inIs179 [ida-1p::GFP] II; him-5(e1490)V	early L4	20	ida-1p::gfp	male	0	0	30	30
CHL64	drpIs3 [lin-48p::tdTomato] I; inIs179 [ida-1p::GFP] II; him-5(e1490)V	mid L4	20	ida-1p::gfp	male	0	0	36	36
CHL64	drpIs3 [lin-48p::tdTomato] I; inIs179 [ida-1p::GFP] II; him-5(e1490)V	late L4	20	ida-1p::gfp	male	4	64	4	72
CHL64	drpIs3 [lin-48p::tdTomato] I; inIs179 [ida-1p::GFP] II; him-5(e1490)V	adult	20	ida-1p::gfp	male	6	44	6	56
Notes	lin-48::tdTomato was used to label PHD and only lin-48::tdTomato + cells were scored

## Sheet: Fig. 3 S1 - G
Figure 3 S1 - G						PHD
Strain	Genotype	Stage	Temperature (℃)	Reporter scored	Sex	2 cells	1 cell	0 cells	N (total cells)
CHL67	drpIs3 [lin-48p::tdTomato] I; drpIs4 [oig-8p::GFP+pha-1(+)]; him-5(e1490) V	late L3	20	oig-8p::gfp	male	0	0	30	30
CHL67	drpIs3 [lin-48p::tdTomato] I; drpIs4 [oig-8p::GFP+pha-1(+)]; him-5(e1490) V	early L4	20	oig-8p::gfp	male	0	0	30	30
CHL67	drpIs3 [lin-48p::tdTomato] I; drpIs4 [oig-8p::GFP+pha-1(+)]; him-5(e1490) V	mid L4	20	oig-8p::gfp	male	0	0	30	30
CHL67	drpIs3 [lin-48p::tdTomato] I; drpIs4 [oig-8p::GFP+pha-1(+)]; him-5(e1490) V	late L4	20	oig-8p::gfp	male	0	0	30	30
CHL67	drpIs3 [lin-48p::tdTomato] I; drpIs4 [oig-8p::GFP+pha-1(+)]; him-5(e1490) V	adult	20	oig-8p::gfp	male	30	69	1	100
Notes	lin-48::tdTomato was used to label PHD and only lin-48::tdTomato + cells were scored

## Sheet: Fig. 3 S1 - H
Blue higlight	P-value considered in graphs
Figure 3 S1 - H						PHD					Fisher's exact test
Strain	Genotype	Stage	Temperature (℃)	Reporter scored	Sex	2 cells	1 cell	0 cells	N (total cells)		P-value (2 cells)	P-value (1 cell)	P-value (0 cell)	Comparison
CHL56	drpIs3 [lin-48::tdTomato] I; him-5(e1490) V	adult	20	lin-48::tdTomato	male	7	64	3	74		0.1361	0.6805	0.3836	lin-48 vs oig-8
CHL65	drpIs4 [oig-8p::GFP+pha-1(+)]; him-5(e1490) V	adult	20	oig-8p::gfp	male	17	95	2	114		<0.0001	0.0108	0.3132	lin-48 vs double
CHL67	drpIs3 [lin-48p::tdTomato] I; drpIs4 [oig-8p::GFP+pha-1(+)]; him-5(e1490) V	adult	20	oig-8p::gfp & lin-48::tdTomato	male	30	69	1	100		0.0085	0.0154	1	oig-8 vs double
CHL32	dpy-5(e907) I; otIs356 [rab-3p::2xNLS::TagRFP], him-5 (e1490) V; drpIs1 [grl-2p::GFP, dpy-5(+)] X	adult	20	grl-2p::gfp	male	0	76	16	92		-	-	-	-
CHL61	drpIs3 [lin-48p::tdTomato] I; him-5(e1490)V; drpIs1 [grl-2p::GFP, dpy-5(+)] X	adult	20	grl-2p::gfp & lin-48::tdTomato	male	3	30	12	45		0.0073	0.5273	0.0072	lin-48 vs grl-2
											1	0.0189	0.0009	lin-48 vs double
Notes	PHD is easily identified using lin-48::tdTomato or oig-8::gfp. To distinguish PHD from PHso2 (both labelled by grl-2::gfp) rab-3::rfp was included in th grl-2::gfp 'single' background										0.0338	0.0498	0.2597	grl-2 vs double
