# Supplementary material for: Direct glia-to-neuron transdifferentiation gives rise to a pair of male-specific neurons that ensure nimble male mating
Source: eLife. 2020 Nov 3;9:e48361. doi: 10.7554/eLife.48361 (PMC7609048; doi:10.7554/eLife.48361)
Supplement: Figure 3—source data 1. [file elife-48361-fig3-data1.xlsx]

## Sheet: Fig. 3 - B
Figure 3 - B
				mir-228p::gfp (cells per side)			rab-3p::rfp (cells per side)
Strain	Genotype	Stage	Temperature (ºC)	PHso1/PHD = PHso2	PHso1/PHD<PHso2	PHso1/PHD off	PHso1/PHD on	PHso1/PHD off	N (total cells)
BAR37	nsIs198 [mir-228p::GFP + lin-15(+)]; otIs356 [rab-3p::2xNLS::TagRFP], him-5(e1490) V	L3 – L4	20	53	0	0	0	53	53
BAR37	nsIs198 [mir-228p::GFP + lin-15(+)]; otIs356 [rab-3p::2xNLS::TagRFP], him-5(e1490) V	L4	20	24	51	0	7	68	75
BAR37	nsIs198 [mir-228p::GFP + lin-15(+)]; otIs356 [rab-3p::2xNLS::TagRFP], him-5(e1490) V	1-day adult	20	1	49	0	50	0	50
BAR37	nsIs198 [mir-228p::GFP + lin-15(+)]; otIs356 [rab-3p::2xNLS::TagRFP], him-5(e1490) V	2-day adult	20	0	8	51	59	0	59

## Sheet: Fig. 3 - C
Figure 3 - C
				grl-2p::gfp (cells per side)			rab-3p::rfp (cells per side)
Strain	Genotype	Stage	Temperature (ºC)	PHso1/PHD = PHso2	PHso1/PHD<PHso2	PHso1/PHD off	PHso1/PHD on	PHso1/PHD off	N (total cells)
CHL32	dpy-5(e907) I; otIs356 [rab-3p::2xNLS::TagRFP], him-5 (e1490) V; drpIs1 [grl-2p::GFP, dpy-5(+)] X	L3 – L4	20	61	0	0	0	61	61
CHL32	dpy-5(e907) I; otIs356 [rab-3p::2xNLS::TagRFP], him-5 (e1490) V; drpIs1 [grl-2p::GFP, dpy-5(+)] X	L4	20	0	51	0	7	44	51
CHL32	dpy-5(e907) I; otIs356 [rab-3p::2xNLS::TagRFP], him-5 (e1490) V; drpIs1 [grl-2p::GFP, dpy-5(+)] X	1-day adult	20	0	47	2	49	0	49
CHL32	dpy-5(e907) I; otIs356 [rab-3p::2xNLS::TagRFP], him-5 (e1490) V; drpIs1 [grl-2p::GFP, dpy-5(+)] X	2-day adult	20	0	12	39	51	0	51

## Sheet: Fig. 3 - G
Figure 3 - G
Strain	Genotype	Stage	Temperature (ºC)	Cells scored	Replicates	AMso'+MCM				PHD
CHL56	drpIs3 [lin-48p::tdTomato] I; him-5(e1490) V	late L4 – 1-day adult	20	EdU +/- cells from lin-48::tdTomato+ cells		2 cells	1 cell	0 cells	N (total cells)	2 cells	1 cell	0 cells	N (total cells)	% 2 EdU+ / lin-48::tdTomato+ per side
					Sum replicates 1-4 (in graph)	217	0	0	217	47	0	173	220	21.3636
					Individual replicates:
					Replicate 1	55	0	0	55	6	0	48	54	11.1111
					Replicate 2	44	0	0	44	14	0	33	47	29.7872
					Replicate 3	12	0	0	12	3	0	9	12	25
					Replicate 4	106	0	0	106	24	0	83	107	22.4299
Notes	Four independent EdU experiments were performed. The sum of the cells in all four experiments are plotted in the graph.
