# Supplementary material for: Direct glia-to-neuron transdifferentiation gives rise to a pair of male-specific neurons that ensure nimble male mating
Source: eLife. 2020 Nov 3;9:e48361. doi: 10.7554/eLife.48361 (PMC7609048; doi:10.7554/eLife.48361)
Supplement: Figure 4—source data 1. [file elife-48361-fig4-data1.xlsx]

## Sheet: Fig. 4 - B
Blue higlight	P-value considered in graphs
Figure 4 - B					Masculinising array			PHso1 (cells per side)			Fisher's exact test (two-tailed)
Strain	Genotype	Stage	Temperature (℃)	Reporter scored	Animal (elt-2 +/-)	PHso1 (mCherry +/-)	PHso2 (mCherry +/-)	on	off	N (total cells)	Comparison	P-value
BAR77	oleEx24 [grl-2(1kb)::fem-3::SL2::mCherry (8ng) + elt-2::GFP (40ng)]; inIs179 (ida-1p::GFP) II; him-8(e1489) IV	Young adult hermaphrodite (<10 eggs)	20	ida-1p::gfp	+	+	+	82	5	87	PHso1+ PHso2+ with non array-carrying	< 0.0001
BAR77	oleEx24 [grl-2(1kb)::fem-3::SL2::mCherry (8ng) + elt-2::GFP (40ng)]; inIs179 (ida-1p::GFP) II; him-8(e1489) IV	Young adult hermaphrodite (<10 eggs)	20	ida-1p::gfp	+	+	-	11	0	11	PHso1+ PHso2- with non array-carrying	< 0.0001
BAR77	oleEx24 [grl-2(1kb)::fem-3::SL2::mCherry (8ng) + elt-2::GFP (40ng)]; inIs179 (ida-1p::GFP) II; him-8(e1489) IV	Young adult hermaphrodite (<10 eggs)	20	ida-1p::gfp	+	-	+	0	134	134	PHso1- PHso2+ with non array-carrying	1
BAR77	oleEx24 [grl-2(1kb)::fem-3::SL2::mCherry (8ng) + elt-2::GFP (40ng)]; inIs179 (ida-1p::GFP) II; him-8(e1489) IV	Young adult hermaphrodite (<10 eggs)	20	ida-1p::gfp	+	-	-	0	116	116	PHso1- PHso2- array-carrying with non array-carrying	1
BAR77	oleEx24 [grl-2(1kb)::fem-3::SL2::mCherry (8ng) + elt-2::GFP (40ng)]; inIs179 (ida-1p::GFP) II; him-8(e1489) IV	Young adult hermaphrodite (<10 eggs)	20	ida-1p::gfp	-	-	-	0	232	232	PHso1+ PHso2+ with PHso1+ PHso2-	1
Notes	mcherry was used to identify the presence of the extrachromosomal array in the cells of interest. elt-2::gfp was used to identify the presence of the array in the whole animal

## Sheet: Fig. 4 - C
Blue higlight	P-value considered in graphs
Figure 4 - C					Masculinising array			PHso1 (cells per side)				Fisher's exact test (two-tailed)
Strain	Genotype	Stage	Temperature (℃)	Reporter scored	Animal (elt-2 +/-)	PHso1 (mCherry +/-)	PHso2 (mCherry +/-)	on	off	N (total cells)		Comparison	P-value
CHL62	oleEx18 [grl-2(1kb)::fem-3::SL2::mCherry(20ng) + elt-2p::GFP(40ng)]; drpIs3 [lin-48p::tdTomato] I; otIs291 [rab-3p::NLS::YFP + rol-6], him-5(e1490)V	Young adult hermaphrodite (<10 eggs)	20	rab-3p::rfp	+	n.a.	n.a.	16	46	62		array-carrying and non array-carrying animals	< 0.0001
CHL62	oleEx18 [grl-2(1kb)::fem-3::SL2::mCherry(20ng) + elt-2p::GFP(40ng)]; drpIs3 [lin-48p::tdTomato] I; otIs291 [rab-3p::NLS::YFP + rol-6], him-5(e1490)V	Young adult hermaphrodite (<10 eggs)	20	rab-3p::rfp	-	n.a.	n.a.	0	80	80
Notes	mcherry could not be used to identify the presence of the extrachromosomal array in the cells of interest, as it was too dim. elt-2::gfp was used to identify the presence of the array in the whole animal
