# Supplementary material for: Direct glia-to-neuron transdifferentiation gives rise to a pair of male-specific neurons that ensure nimble male mating
Source: eLife. 2020 Nov 3;9:e48361. doi: 10.7554/eLife.48361 (PMC7609048; doi:10.7554/eLife.48361)
Supplement: Figure 5—figure supplement 1—source data 1. [file elife-48361-fig5-figsupp1-data1.xlsx]

## Sheet: Fig. 5 S1 - A
Blue higlight	P-value considered in graphs
Figure 5 S1 - A						AMso'+MCM						Fisher's exact test (two-tailed)						PHD				Fisher's exact test (two-tailed)
Strain	Genotype	Stage	Temperature (℃)	Reporter scored	Sex	4 cells	3 cells	2 cells	1 cell	0 cells	N (total cells)	P-value 4 cells	P-value 3 cells	P-value 2 cells	P-value 1 cell	P-value 0 cells	Comparison	2 cells	1 cell	0 cells	N (total cells)	P-value 2 cells	P-value 1 cell	P-value 0 cells	Comparison
CHL74	L4440 P0 RNAi + drpIs3 [lin-48p::tdTomato] I; inIs179 [ida-1p::GFP] II; him-8(e1489) IV; nre-1(hd20), lin-15B(hd126) X	late L4 - 1 day adult	20	lin-48p::tdTomato	male	0	0	116	2	0	118	-	-	-	-	-	-	2	113	3	118	-	-	-	-
CHL74	L4440 F1 RNAi + drpIs3 [lin-48p::tdTomato] I; inIs179 [ida-1p::GFP] II; him-8(e1489) IV; nre-1(hd20), lin-15B(hd126) X	late L4 - 1 day adult	20	lin-48p::tdTomato	male	0	0	115	3	0	118	-	-	-	-	-	-	0	117	1	118	-	-	-	-
CHL74	sox-2 P0 RNAi + drpIs3 [lin-48p::tdTomato] I; inIs179 [ida-1p::GFP] II; him-8(e1489) IV; nre-1(hd20), lin-15B(hd126) X	late L4 - 1 day adult	20	lin-48p::tdTomato	hermaphrodite	0	0	0	44	0	44	1	1	-	-	-	-	0	44	0	44	-	-	-	-
CHL74	sox-2 F1 RNAi + drpIs3 [lin-48p::tdTomato] I; inIs179 [ida-1p::GFP] II; him-8(e1489) IV; nre-1(hd20), lin-15B(hd126) X	late L4 - 1 day adult	20	lin-48p::tdTomato	hermaphrodite	0	0	5	29	0	34	1	1	0.0132	0.0132	1	hermaphrodite P0 vs F1	0	34	0	34	1	1	1	hermaphrodite P0 vs F1
CHL74	sox-2 P0 RNAi + drpIs3 [lin-48p::tdTomato] I; inIs179 [ida-1p::GFP] II; him-8(e1489) IV; nre-1(hd20), lin-15B(hd126) X	late L4 - 1 day adult	20	lin-48p::tdTomato	male	0	0	123	3	0	126	1	1	1	1	1	male L4440 vs sox-2 RNAi P0	4	115	3	122	0.6838	0.769	1	male L4440 vs sox-2 RNAi P0
CHL74	sox-2 F1 RNAi + drpIs3 [lin-48p::tdTomato] I; inIs179 [ida-1p::GFP] II; him-8(e1489) IV; nre-1(hd20), lin-15B(hd126) X	late L4 - 1 day adult	20	lin-48p::tdTomato	male	10	1	35	0	0	46	0.0001	0.2805	0.0005	0.5619	1	male L4440 vs sox-2 RNAi F1	5	41	0	46	0.0015	0.0069	1	male L4440 vs sox-2 RNAi F1
												0.0001	0.2674	0.0003	0.5653	1	male sox-2 RNAi P0 vs F1					0.0645	0.313	0.5626	male sox-2 RNAi P0 vs F1
Notes	N numbers include drpIs3-expressing worms from the CHL70 strain

## Sheet: Fig. 5 S1 - B
Blue higlight	P-value considered in graphs
Figure 5 S1 - B
Strain	Genotype	Stage	Temperature (℃)	Reporter scored	Sex	AMso'+MCM				Fisher's exact test (two-tailed)				PHD				Fisher's exact test (two-tailed)
CHL74	L4440 P0 RNAi + drpIs3 [lin-48p::tdTomato] I; inIs179 [ida-1p::GFP] II; him-8(e1489) IV; nre-1(hd20), lin-15B(hd126) X	late L4 - 1 day adult	20	ida-1p::gfp	male	2 cells	1 cell	0 cells	N (total cells)	p-value 2 cells	p-value 1 cell	p-value 0 cells	Comparison	2 cells	1 cell	0 cells	N (total cells)	P-value 2 cells	P-value 1 cell	P-value 0 cells	Comparison
CHL74	L4440 F1 RNAi + drpIs3 [lin-48p::tdTomato] I; inIs179 [ida-1p::GFP] II; him-8(e1489) IV; nre-1(hd20), lin-15B(hd126) X	late L4 - 1 day adult	20	ida-1p::gfp	male	0	57	1	58	-	-	-	-	0	53	3	56	-	-	-	-
CHL74	GFP P0 RNAi + drpIs3 [lin-48p::tdTomato] I; inIs179 [ida-1p::GFP] II; him-8(e1489) IV; nre-1(hd20), lin-15B(hd126) X	late L4 - 1 day adult	20	ida-1p::gfp	male	0	56	2	58	-	-	-	-	0	53	5	58	-	-	-	-
CHL74	GFP F1 RNAi + drpIs3 [lin-48p::tdTomato] I; inIs179 [ida-1p::GFP] II; him-8(e1489) IV; nre-1(hd20), lin-15B(hd126) X	late L4 - 1 day adult	20	ida-1p::gfp	male	0	1	97	98	1	<0.0001	0.0001	L4440 P0 vs GFP P0	0	14	83	97	1	<0.0001	0.0001	L4440 P0 vs GFP P0
CHL74	sox-2 P0 RNAi + drpIs3 [lin-48p::tdTomato] I; inIs179 [ida-1p::GFP] II; him-8(e1489) IV; nre-1(hd20), lin-15B(hd126) X	late L4 - 1 day adult	20	ida-1p::gfp	male	0	7	41	48	1	<0.0001	0.0001	L4440 F1 vs GFP F1	0	5	43	48	1	<0.0001	0.0001	L4440 F1 vs GFP F1
CHL74	sox-2 F1 RNAi + drpIs3 [lin-48p::tdTomato] I; inIs179 [ida-1p::GFP] II; him-8(e1489) IV; nre-1(hd20), lin-15B(hd126) X	late L4 - 1 day adult	20	ida-1p::gfp	male	0	84	6	90	1	0.0816	0.0816	L4440 P0 vs sox-2 RNAi P0	2	85	0	87	0.5201	0.38	0.0581	L4440 P0 vs sox-2 RNAi P0
						6	20	0	26	0.0006	0.0096	1	L4440 F1 vs sox-2 RNAi F1	2	23	1	26	0.0932	0.6983	0.6608	L4440 F1 vs sox-2 RNAi F1
										0.0001	0.0257	0.3465	sox-2 RNAi P0 vs F1					0.2263	0.079	0.2301	sox-2 RNAi P0 vs F1

## Sheet: Fig. 5 S1 - C
Blue higlight	P-value considered in graphs
Figure 5 S1 - C						AMso'+MCM						Fisher's exact test (two-tailed)						PHD				Fisher's exact test (two-tailed)
Strain	Genotype	Stage	Temperature (℃)	Reporter scored	Sex	4 cells	3 cells	2 cells	1 cell	0 cells	N (total cells)	P-value 4 cells	P-value 3 cells	P-value 2 cells	P-value 1 cell	P-value 0 cells	Comparison	2 cells	1 cell	0 cells	N (total cells)	P-value 2 cells	P-value 1 cell	P-value 0 cells	Comparison
CHL71	drpIs3 [lin-48p::tdTomato] I; inIs179 [ida-1p::GFP] II; him-8(e1489) IV	late L4 - 1 day adult	20	lin-48p::tdTomato	male	0	0	82	2	0	84	-	-	-	-	-	-	7	77	0	84	-	-	-	-
CHL72	drpIs3 [lin-48p::tdTomato] I; inIs179 [ida-1p::GFP] II; him-8(e1489) IV; otEx4454 [sox-2(fosmid)::mCherry + elt-2p::DsRed]	late L4 - 1 day adult	20	lin-48p::tdTomato	male	0	0	64	0	0	64	1	1	0.5058	0.5058	1	wt - otEx4454 vs wt + otEx4454	13	51	0	64	0.0508	0.0508	1	wt - otEx4454 vs wt + otEx4454
CHL73	drpIs3 [lin-48p::tdTomato] I; inIs179 [ida-1p::GFP] II; him-8(e1489) IV; sox-2(ot640[unc-119(+)]) X; otEx4454 [sox-2(fosmid)::mCherry + elt-2p::DsRed]	late L4 - 1 day adult	20	lin-48p::tdTomato	male	3	263	0	0	0	266	1	1	0.5972	0.0571	1	wt - otEx4454 vs sox-2 + otEx4454	32	234	0	266	0.429	0.429	1	wt - otEx4454 vs sox-2 + otEx4454
												1	1	1	1	1	wt + otEx4454 vs sox-2 + otEx4454					0.1032	0.1032	1	wt + otEx4454 vs sox-2 + otEx4454
Notes	In CHL73 A mixed population of sox-2 mutant (mosaic or non-rescued) and ‘wild type’ (mutant-rescued) cells were scored.
