# Supplementary material for: Direct glia-to-neuron transdifferentiation gives rise to a pair of male-specific neurons that ensure nimble male mating
Source: eLife. 2020 Nov 3;9:e48361. doi: 10.7554/eLife.48361 (PMC7609048; doi:10.7554/eLife.48361)
Supplement: Figure 5—source data 1. [file elife-48361-fig5-data1.xlsx]

## Sheet: Fig. 5 - A
Blue higlight	P-value considered in graphs
Figure 5 - A					AMso'+MCM					Fisher's exact test (two-tailed)					PHD				Fisher's exact test (two-tailed)
Strain	Genotype	Stage	Temperature (℃)	Reporter scored	3 cells	2 cells	1 cell	0 cells	N (total cells)	P-value 3 cells	P-value 2 cells	P-value 1 cell	P-value 0 cells	Comparison	2 cells	1 cell	0 cells	N (total cells)	P-value 2 cells	P-value 1 cell	P-value 0 cells	Comparison
CHL58	drpIs3 [lin-48p::tdTomato] I; otIs291 [rab-3p::2xNLS::YFP + rol-6(su1006)], him-5(e1490) V	late L4 - 1 day adult	20	lin-48p::tdTomato	0	104	0	0	104	-	-	-	-	-	6	98	0	104	-	-	-	-
CHL68	sem-4(n19719), drpIs3 [lin-48p::tdTomato] I; otIs291 [rab-3p::2xNLS::YFP + rol-6(su1006)], him-5(e1490) V	late L4 - 1 day adult	20	lin-48p::tdTomato	0	143	1	0	144	1	1	1	1	wt vs sem-4	5	135	4	143	0.1586	0.1677	0.7234	wt vs sem-4
CHL69	drpIs3 [lin-48p::tdTomato] I; egl-27(ok1670) II; otIs291 [rab-3p::2xNLS::YFP + rol-6(su1006)], him-5(e1490) V	late L4 - 1 day adult	20	lin-48p::tdTomato	1	153	14	2	170	1	0.0004	0.0013	0.5273	wt vs egl-27	0	0	170	170	0.0027	<0.0001	<0.0001	wt vs egl-27
CHL58	drpIs3 [lin-48p::tdTomato] I; otIs291 [rab-3p::2xNLS::YFP + rol-6(su1006)], him-5(e1490) V	late L4 - 1 day adult	20	rab-3p::yfp	0	0	104	0	104	-	-	-	-	-	6	98	0	104	-	-	-	-
CHL68	sem-4(n19719), drpIs3 [lin-48p::tdTomato] I; otIs291 [rab-3p::2xNLS::YFP + rol-6(su1006)], him-5(e1490) V	late L4 - 1 day adult	20	rab-3p::yfp	0	2	138	4	143	1	0.511	0.0416	0.1416	wt vs sem-4	4	129	7	140	0.2148	1	0.1441	wt vs sem-4
CHL69	drpIs3 [lin-48p::tdTomato] I; egl-27(ok1670) II; otIs291 [rab-3p::2xNLS::YFP + rol-6(su1006)], him-5(e1490) V	late L4 - 1 day adult	20	rab-3p::yfp	0	1	167	2	170	1	1	0.2909	0.5273	wt vs egl-27	-	-	-	-	-	-	-	-

## Sheet: Fig. 5 - B
Blue higlight	P-value considered in graphs
Figure 5 - B					AMso'+MCM				Fisher's exact test (two-tailed)				PHD				Fisher's exact test (two-tailed)
Strain	Genotype	Stage	Temperature (℃)	Reporter scored	2 cells	1 cell	0 cells	N (total cells)	P-value 2 cells	P-value 1 cell	P-value 0 cells	Comparison	2 cells	1 cell	0 cells	N (total cells)	P-value 2 cells	P-value 1 cell	P-value 0 cells	Comparison
CHL70	L4440 P0 RNAi + drpIs3 [lin-48p::tdTomato] I; otIs291 [rab-3p::2xNLS::YFP + rol-6(su1006)], him-5(e1490) V; nre-1(hd20), lin-15B(hd126) X	late L4 - 1 day adult	20	rab-3p::yfp	0	60	0	60	-	-	-	-	2	57	0	59	-	-	-	-
CHL70	L4440 F1 RNAi + drpIs3 [lin-48p::tdTomato] I; otIs291 [rab-3p::2xNLS::YFP + rol-6(su1006)], him-5(e1490) V; nre-1(hd20), lin-15B(hd126) X	late L4 - 1 day adult	20	rab-3p::yfp	0	60	0	60	-	-	-	-	0	59	0	59	-	-	-	-
CHL70	GFP P0 RNAi + drpIs3 [lin-48p::tdTomato] I; otIs291 [rab-3p::2xNLS::YFP + rol-6(su1006)], him-5(e1490) V; nre-1(hd20), lin-15B(hd126) X	late L4 - 1 day adult	20	rab-3p::yfp	0	5	79	84	1	<0.0001	1	L4440 P0 vs GFP P0	1	48	33	82	0.5715	<0.0001	<0.0001	L4440 P0 vs GFP P0
CHL70	GFP F1 RNAi + drpIs3 [lin-48p::tdTomato] I; otIs291 [rab-3p::2xNLS::YFP + rol-6(su1006)], him-5(e1490) V; nre-1(hd20), lin-15B(hd126) X	late L4 - 1 day adult	20	rab-3p::yfp	0	0	96	96	1	<0.0001	1	L4440 F1 vs GFP F1	1	60	31	92	1	<0.0001	<0.0001	L4440 F1 vs GFP F1
CHL70	sox-2 P0 RNAi + drpIs3 [lin-48p::tdTomato] I; otIs291 [rab-3p::2xNLS::YFP + rol-6(su1006)], him-5(e1490) V; nre-1(hd20), lin-15B(hd126) X	late L4 - 1 day adult	20	rab-3p::yfp	0	36	0	36	1	1	1	L4440 P0 vs sox-2 RNAi P0	1	31	0	32	1	1	1	L4440 P0 vs sox-2 RNAi P0
CHL70	sox-2 F1 RNAi + drpIs3 [lin-48p::tdTomato] I; otIs291 [rab-3p::2xNLS::YFP + rol-6(su1006)], him-5(e1490) V; nre-1(hd20), lin-15B(hd126) X	late L4 - 1 day adult	20	rab-3p::yfp	5	15	0	20	0.0006	0.0006	1	L4440 F1 vs sox-2 RNAi F1	2	18	0	20	0.0617	0.0617	1	L4440 F1 vs sox-2 RNAi F1
									0.0041	0.0041	1	sox-2 RNAi P0 vs F1					0.5511	0.5511	1	sox-2 RNAi P0 vs F1

## Sheet: Fig. 5 - C
Blue higlight	P-value considered in graphs
Figure 5 - C					AMso'+MCM				Fisher's exact test (two-tailed)				PHD				Fisher's exact test (two-tailed)
Strain	Genotype	Stage	Temperature (℃)	Reporter scored	2 cells	1 cell	0 cells	N (total cells)	P-value 2 cells	P-value 1 cell	P-value 0 cells	Comparison	2 cells	1 cell	0 cells	N (total cells)	P-value 2 cells	P-value 1 cell	P-value 0 cells	Comparison
CHL71	drpIs3 [lin-48p::tdTomato] I; inIs179 [ida-1p::GFP] II; him-8(e1489) IV	late L4 - 1 day adult	20	ida-1p::gfp	0	82	0	82	-	-	-	-	7	75	2	84	-	-	-	-
CHL72	drpIs3 [lin-48p::tdTomato] I; inIs179 [ida-1p::GFP] II; him-8(e1489) IV; otEx4454 [sox-2(fosmid)::mCherry + elt-2p::DsRed]	late L4 - 1 day adult	20	ida-1p::gfp	0	64	0	64	1	1	1	wt - otEx4454 vs wt + otEx4454	11	51	2	64	0.1295	0.1606	1	wt - otEx4454 vs wt + otEx4454
CHL73	drpIs3 [lin-48p::tdTomato] I; inIs179 [ida-1p::GFP] II; him-8(e1489) IV; sox-2(ot640[unc-119(+)]) X; otEx4454 [sox-2(fosmid)::mCherry + elt-2p::DsRed]	late L4 - 1 day adult	20	ida-1p::gfp	3	259	4	266	1	0.2058	0.5766	wt - otEx4454 vs sox-2 + otEx4454	29	234	3	266	0.6803	0.8472	0.5972	wt - otEx4454 vs sox-2 + otEx4454
									1	0.3533	1	wt + otEx4454 vs sox-2 + otEx4454					0.199	0.1032	0.2497	wt + otEx4454 vs sox-2 + otEx4454
Notes	In CHL73 A mixed population of sox-2 mutant (mosaic or non-rescued) and ‘wild type’ (mutant-rescued) cells were scored.
