# Supplementary material for: Direct glia-to-neuron transdifferentiation gives rise to a pair of male-specific neurons that ensure nimble male mating
Source: eLife. 2020 Nov 3;9:e48361. doi: 10.7554/eLife.48361 (PMC7609048; doi:10.7554/eLife.48361)
Supplement: Figure 6—source data 1. [file elife-48361-fig6-data1.xlsx]

## Sheet: Fig. 6-E-F_P-values
	wildtype																					unc-51 + silencing transgene – histamine																				unc-51 + silencing transgene + histamine
	bending 5	29_11_16_6_cell1	29_11_16_6_cell 2	29_11_16_28_cell1	29_11_16_28_cell2	29_11_16_29_cell1	29_11_16_29_cell2	6_Dec_16_4	6_Dec_16_28_cell 1	6_Dec_16_28_cell 2	oleEx27_1_3_Mrach_17	oleEx27_3_cell1_3_Mrach_17	oleEx27_3_cell2_3_Mrach_17	oleEx27_20_18_Mrach_17	6_Dec_16_20_cell1	6_Dec_16_20_cell2	6_Dec_16_23	oleEx27_7_3_Mrach_17	oleEx27_21_18_Mrach_17			unc-51_noHis_oleEx38_28_cell1	unc51_noHis_oleEx38_29_cell 1	unc51_noHis_oleEx38_29_cell 2	unc51_noHis_oleEx38_30	unc51_noHis_oleEx38_1_cell 2	unc51_noHis_oleEx38_2	unc51_noHis_oleEx38_10_cell 1	unc51_noHis_oleEx38_10_cell 2	unc51_noHis_oleEx38_23_cell 1	unc51_noHis_oleEx38_23_cell (2)	unc51_noHis_oleEx38_1_cell 1	unc51_noHis_oleEx38_11	unc51_noHis_oleEx38_13	unc51_noHis_oleEx38_28_cell 2	unc51_noHis_oleEx38_3	oleEx30_unc_NOhist_11	oleEx30_unc_NOhist_12	oleEx30_unc_NOhist_20			unc51_oleEx38_7_cell 1	unc51_oleEx38_7_cell 2	unc51_oleEx38_5	unc51_oleEx38_13_cell 1	unc51_oleEx38_10	unc51_oleEx38_8_cell 1	unc51_oleEx38_8_cell 2	unc51_oleEx38_4
Total Peaks	2	3	2	2	4	6	0	6	4	3	8	6	6	5	0	0	0	2	0			4	5	4	9	1	3	6	5	3	3	5	6	1	0	0	7	4	3			2	2	0	2	2	4	0	0
total frames	2067	2781	2781	1175	1175	1487	1487	3042	2062	2062	2813	4635	4635	3052	1132	1132	2223	3006	3191			2558	3593	3593	1930	2243	3604	3581	3581	1648	1648	2243	2403	3261	2558	3651	3896	3612	2968			2993	2993	1427	1013	1520	2120	2120	1760
total minutes	1.7225	2.3175	2.3175	0.979167	0.979167	1.23917	1.23917	2.535	1.71833	1.71833	2.34417	3.8625	3.8625	2.54333	0.943333	0.943333	1.8525	2.505	2.65917			2.13167	2.99417	2.99417	1.60833	1.86917	3.00333	2.98417	2.98417	1.37333	1.37333	1.86917	2.0025	2.7175	2.13167	3.0425	3.24667	3.01	2.47333			2.49417	2.49417	1.18917	0.844167	1.26667	1.76667	1.76667	1.46667
peaks/min	1.1611	1.2945	0.862999	2.04255	4.08511	4.84196	0	2.36686	2.32784	1.74588	3.41273	1.5534	1.5534	1.96592	0	0	0	0.798403	0			1.87647	1.66991	1.33593	5.59585	0.534998	0.99889	2.01061	1.67551	2.18447	2.18447	2.67499	2.99625	0.367985	0	0	2.15606	1.3289	1.21294			0.801871	0.801871	0	2.3692	1.57895	2.26415	0	0
	One way ANOVA with multiple comparisons, comparing the frequency values of calcium transients per neuron between animals with different unc-51 genotypes (+/- silencing array) and treatments (+/- histamine)
	Dunnett's multiple comparisons test				Mean Diff.	95.00% CI of diff.	Significant?	Summary	Adjusted P Value	B-?
	unc_oleEx38 +his vs. unc_oleEx38 no his				-0.9427	-1.777 to -0.1086	Yes	*	0.0244	A	unc_oleEx38 no his
	unc_oleEx38 +his vs. unc +hist no array				-0.785	-1.542 to -0.02764	Yes	*	0.0411	C	unc +hist no array
	Test details				Mean 1	Mean 2	Mean Diff.	SE of diff.	n1	n2	q	DF
	unc_oleEx38 +his vs. unc_oleEx38 no his				0.7687	1.711	-0.9427	0.3685	20	18	2.558	62
	unc_oleEx38 +his vs. unc +hist no array				0.7687	1.554	-0.785	0.3346	20	27	2.346	62
	One way ANOVA with multiple comparisons, comparing the frequency values of calcium transients per neuron between WT, unc-13 and unc-31 animals.
	Dunnett's multiple comparisons test				Mean Diff.	95.00% CI of diff.	Significant?	Summary	Adjusted P Value	D-?
	wt vs. unc13				-0.5573	-1.966 to 0.8518	No	ns	0.5698	E	unc13
	wt vs. unc-31				0.3536	-0.6803 to 1.388	No	ns	0.6524	F	unc-31
	Test details				Mean 1	Mean 2	Mean Diff.	SE of diff.	n1	n2	q	DF
	wt vs. unc13				1.58	2.137	-0.5573	0.6156	19	7	0.9053	42
	wt vs. unc-31				1.58	1.226	0.3536	0.4517	19	19	0.7828	42
[truncated: 66 more columns]

## Sheet: Fig. 6-E_Rmax muscle silencing
unc-51 + silencing transgene – histamine																				unc-51 + silencing transgene + histamine																								unc-51 – silencing transgene + histamine
unc-51_noHis_oleEx38_28_cell1	unc51_noHis_oleEx38_29_cell 1	unc51_noHis_oleEx38_29_cell 2	unc51_noHis_oleEx38_30	unc51_noHis_oleEx38_1_cell 2	unc51_noHis_oleEx38_2	unc51_noHis_oleEx38_10_cell 1	unc51_noHis_oleEx38_10_cell 2	unc51_noHis_oleEx38_23_cell 1	unc51_noHis_oleEx38_23_cell (2)	unc51_noHis_oleEx38_1_cell 1	unc51_noHis_oleEx38_11	unc51_noHis_oleEx38_13	unc51_noHis_oleEx38_28_cell 2	unc51_noHis_oleEx38_3	oleEx30_unc_NOhist_11	oleEx30_unc_NOhist_12	oleEx30_unc_NOhist_20			unc51_oleEx38_7_cell 1	unc51_oleEx38_7_cell 2	unc51_oleEx38_5	unc51_oleEx38_13_cell 1	unc51_oleEx38_10	unc51_oleEx38_8_cell 1	unc51_oleEx38_8_cell 2	unc51_oleEx38_4	unc51_oleEx38_14	unc51_oleEx38_13_cell 2	unc51_His_oleEx38_20	unc51_oleEx38_1	oleEx30_unc_hist_1	oleEx30_unc_hist_3	oleEx30_unc_hist_4	oleEx30_unc_hist_5	oleEx30_unc_hist_6_chunk	oleEx30_unc_hist_13	oleEx30_unc_hist_16	oleEx30_unc_hist_19					unc-51_no_oleEx38_3	unc-51_no_oleEx38_6	unc51_no_oleEx38_11	unc51_no_oleEx38_12_cell 1	unc51_no_oleEx38_12_cell 2	unc51_no_oleEx38_16
1.51207	0.488316	-2.08439	-0.546402	-0.380462	-0.690974	-0.44241	-0.269316	-0.123448	0.157111	0.0413467	-1.89586	-0.798155	-0.660835	-0.0148114	0.793179	0.275485	-0.698554			0.136842	-0.346398	-0.643477	0.0291312	-0.111934	-0.455332	0.00870315	-0.721819	0.650139	-0.144264	-0.370952	0.148362	0.293279	0.291788	-0.381559	0.81787	0.180176	0.0954104	0.377686	0.0812445					0.625278	-0.295375	0.158254	-0.550126	0.243632	0.00420722
1.5147	0.477927	-2.02554	-0.423282	-0.427215	-0.687297	-0.332977	-0.253728	-0.13542	0.0656486	0.00947956	-1.87627	-0.797114	-0.532675	-0.0172255	0.770078	0.215389	-0.686485			0.14918	-0.309289	-0.652646	0.0281981	-0.110783	-0.463322	-0.414532	-0.787883	0.467361	-0.153639	-0.40784	0.111888	0.273154	0.30102	-0.408616	0.832239	0.161637	0.103297	0.376217	0.0791506					0.590046	-0.278083	0.133719	-0.539235	0.233712	0.00320367
1.50664	0.485092	-1.95949	-0.293796	-0.456021	-0.683334	-0.298268	-0.238098	-0.137268	0.0319964	0.0417517	-1.86721	-0.788227	-0.517195	-0.0170809	0.76401	0.224076	-0.678766			0.111343	-0.285524	-0.454896	0.006603	-0.133046	-0.451193	-0.162349	-0.680615	0.26494	-0.161788	-0.419589	0.10286	0.253647	0.236593	-0.414639	0.794602	0.160245	0.0765668	0.373786	0.076676					0.600371	-0.286258	0.102248	-0.520985	0.221106	0.00353317
1.50349	0.511328	-1.87726	-0.15321	-0.512556	-0.677193	-0.136467	-0.186674	-0.124254	-0.0254756	0.0788561	-1.85456	-0.789141	-0.5278	-0.0164737	0.726426	0.114312	-0.667422			0.0545492	-0.281133	-0.711171	0.000259183	-0.137511	-0.438198	0.0491909	-0.923061	-0.00175993	-0.164153	-0.441785	0.121388	0.246068	0.181462	-0.375595	0.782516	0.147549	0.0447659	0.372453	0.0764021					0.616281	-0.269208	0.0902594	-0.495528	0.21336	0.00450688
1.50992	0.524347	-1.79351	-0.0259606	-0.516582	-0.671432	-0.00235366	-0.183612	-0.120397	-0.0886041	0.138599	-1.84077	-0.784142	-0.643485	-0.0164393	0.723676	0.221704	-0.655059			-0.034877	-0.283656	-0.378429	-0.00776423	-0.130951	-0.418724	0.169304	-0.531644	0.0175252	-0.160226	-0.483257	0.146606	0.249552	0.25414	-0.37876	0.802456	0.141397	0.0473976	0.369061	0.0738924					0.632023	-0.260241	0.0815687	-0.474287	0.206385	0.00347519
1.51171	0.51256	-1.7082	-0.013607	-0.483238	-0.668026	0.0345899	-0.178467	-0.092323	-0.111431	0.144057	-1.83985	-0.775666	-0.702283	-0.02083	0.703171	0.108629	-0.648655			0.0213492	-0.281803	-0.183211	-0.0190864	-0.13946	-0.408203	0.313291	-0.326912	0.0731143	-0.14379	-0.527138	0.231966	0.25554	0.252448	-0.385254	0.750793	0.127488	0.077497	0.347896	0.0741166					0.677374	-0.258747	0.0801019	-0.46181	0.204404	0.00193859
1.54849	0.439781	-1.64055	0.00172992	-0.43519	-0.665355	0.0629878	-0.178944	-0.103719	-0.128978	0.0718267	-1.83547	-0.848863	-0.744914	-0.017301	0.712557	0.117941	-0.649875			0.00701029	-0.249779	-0.186417	-0.0100604	-0.142279	-0.419474	0.450269	0.0340968	0.299855	-0.147644	-0.580163	0.277295	0.256912	0.282629	-0.310981	0.759251	0.125417	0.107365	0.325724	0.0742991					0.588854	-0.230571	0.0655449	-0.435467	0.202642	0.0017417
1.57954	0.350579	-1.57976	0.0180685	-0.410565	-0.660381	0.0546274	-0.177954	-0.096845	-0.137124	-0.0263956	-1.83934	-0.851626	-0.860698	-0.0189658	0.689771	-0.0504846	-0.639995			0.0277954	-0.252182	-0.190527	-0.00351117	-0.165124	-0.410278	0.383395	0.219318	0.272761	-0.148932	-0.621971	0.269451	0.248127	0.347812	-0.272926	0.771086	0.139663	0.0801133	0.304371	0.07865					0.543418	-0.215153	0.0572977	-0.40868	0.203541	0.00199227
1.58674	0.231333	-1.52013	0.0298638	-0.423863	-0.654011	0.0200212	-0.173974	-0.0950877	-0.207975	0.00570081	-1.84433	-0.852911	-1.00185	-0.0168731	0.676306	-0.0249493	-0.630476			0.0344273	-0.233476	-0.140825	-0.0216584	-0.180809	-0.403584	0.262201	0.164795	0.286717	-0.145696	-0.633249	0.235285	0.249356	0.34784	-0.269206	0.774866	0.115212	0.0505376	0.285137	0.0761702					0.476336	-0.21071	0.055271	-0.395076	0.197944	0.00224258
1.59422	0.0950753	-1.47739	0.0352223	-0.388753	-0.651578	-0.0576674	-0.134574	-0.0572633	-0.180228	0.0307585	-1.84566	-0.8236	-1.10092	-0.0168717	0.643562	-0.0693255	-0.625414			-0.0195138	-0.245768	-0.460936	-0.015214	-0.199019	-0.378204	0.291375	0.482291	0.594215	-0.126588	-0.574407	0.26121	0.247829	0.343673	-0.185166	0.795375	0.120755	0.0174349	0.282671	0.0815018					0.481873	-0.22014	0.0719375	-0.382386	0.191258	0.00220646
1.60676	-0.0129314	-1.44366	0.0309059	-0.438228	-0.646207	0.0184104	-0.100382	-0.049957	-0.162749	-0.00942834	-1.84011	-0.821589	-1.25153	-0.0143059	0.618601	-0.0532651	-0.616465			-0.0874078	-0.235898	-0.764137	-0.0322488	-0.203403	-0.366261	0.106093	0.149133	0.880714	-0.112898	-0.595075	0.342511	0.258493	0.366757	-0.151666	0.777205	0.109767	0.0446779	0.280184	0.0823499					0.448449	-0.194375	0.0782221	-0.382995	0.187531	0.00121114
1.61908	-0.138712	-1.41586	0.0155946	-0.432215	-0.641863	-0.0208684	-0.111185	-0.00220939	-0.164789	-0.0805901	-1.83734	-0.826907	-1.35689	-0.00923256	0.604419	-0.083454	-0.613249			-0.0854068	-0.216715	-0.415218	-0.0198671	-0.226385	-0.368778	0.069856	0.297037	0.877341	-0.109836	-0.567331	0.33609	0.290306	0.349846	-0.196989	0.761633	0.11027	0.0489375	0.276898	0.0828901					0.480696	-0.190368	0.0781438	-0.365907	0.184981	-0.000317807
1.56718	-0.229084	-1.38688	0.00559124	-0.465665	-0.63877	-0.0817456	-0.123935	-0.00609907	-0.12259	-0.0808008	-1.83041	-0.829526	-1.31285	-0.00883372	0.573218	-0.117426	-0.618119			-0.11334	-0.205908	-0.800312	-0.0288661	-0.236307	-0.354351	0.0322385	0.260617	0.780659	-0.11292	-0.51545	0.356618	0.287927	0.261137	-0.241692	0.76756	0.13247	0.052537	0.274731	0.0843248					0.476271	-0.188605	0.08347	-0.363497	0.181773	-0.000735515
1.38071	-0.311434	-1.33381	-0.0143651	-0.487104	-0.634832	-0.143687	-0.13794	-0.0199558	-0.112879	-0.108801	-1.81871	-0.822615	-1.36502	-0.0036833	0.559173	0.100361	-0.601328			-0.169598	-0.185656	-0.831533	-0.030347	-0.222753	-0.330214	0.0447008	0.183692	0.459419	-0.111304	-0.459277	0.280593	0.285671	0.256252	-0.211157	0.799143	0.135714	0.0275414	0.272044	0.0852357					0.39585	-0.178234	0.0776036	-0.34601	0.174161	-0.00163665
1.15977	-0.350401	-1.28458	-0.0332482	-0.451075	-0.630631	-0.128635	-0.122222	-0.0217231	-0.017714	-0.0553114	-1.81278	-0.806519	-1.22402	-0.00164373	0.533106	0.0320549	-0.585183			-0.193949	-0.165233	-0.475592	-0.0426762	-0.225152	-0.315882	-0.0307418	0.0263352	0.546812	-0.113122	-0.397182	0.242109	0.2986	0.244733	-0.233611	0.798061	0.119262	0.0286994	0.272797	0.0848679					0.396901	-0.187731	0.0845866	-0.329635	0.170177	-0.000842612
0.94577	-0.378164	-1.23663	-0.0533037	-0.495019	-0.62578	-0.150754	-0.10707	-0.0318626	-0.0192427	0.0048405	-1.81019	-0.787441	-1.06485	-0.000139726	0.506987	0.0235936	-0.590779			-0.220319	-0.13095	-0.0993408	-0.0358425	-0.209255	-0.287588	-0.132022	0.186876	0.520568	-0.108632	-0.342499	0.268692	0.305568	0.191897	-0.247004	0.799851	0.113494	0.0268883	0.270021	0.0854251					0.456199	-0.169885	0.0811116	-0.325524	0.166268	-0.000473865
0.764384	-0.357192	-1.17324	-0.0719734	-0.512402	-0.62153	-0.0467501	-0.0908472	-0.0518434	0.0614773	-0.0160952	-1.81209	-0.779999	-1.03493	0.00196966	0.523666	0.0747662	-0.591181			-0.193701	-0.134461	-0.120667	-0.00415412	-0.210385	-0.272273	-0.236376	0.236243	0.298362	-0.11301	-0.347335	0.276776	0.308864	0.168793	-0.236437	0.775856	0.130007	0.0563455	0.265885	0.087281					0.501307	-0.163443	0.074458	-0.326897	0.162497	-8.60789e-05
0.573113	-0.312485	-1.10399	-0.0809413	-0.573278	-0.613478	0.0596935	-0.111802	-0.0879566	0.0707618	-0.0136441	-1.80797	-0.794861	-1.00731	0.00611914	0.573244	0.175914	-0.591925			-0.177172	-0.130571	-0.0781656	0.00191919	-0.201802	-0.258398	-0.415875	0.114797	0.322312	-0.115369	-0.393765	0.292096	0.34174	0.132503	-0.25193	0.73838	0.121768	0.0879863	0.263688	0.0875681					0.497166	-0.15394	0.0639547	-0.333121	0.157586	-0.000789898
0.381413	-0.322061	-1.00796	-0.0760705	-0.522473	-0.609637	0.136545	-0.132248	-0.122883	0.0926481	0.0445666	-1.80956	-0.794504	-0.930773	0.00596427	0.604645	0.0910168	-0.590171			-0.112138	-0.135837	0.313159	0.0228365	-0.192876	-0.254948	-0.41495	0.0303115	0.0614558	-0.118971	-0.380558	0.277488	0.33891	0.113621	-0.2803	0.728826	0.112972	0.0917048	0.262523	0.0868998					0.578186	-0.144765	0.0618084	-0.306365	0.151936	0.000320495
0.192457	-0.342308	-0.946472	-0.0734553	-0.476504	-0.606167	0.165845	-0.148937	-0.191013	0.170429	0.0975467	-1.80989	-0.756794	-0.763126	-0.00121844	0.634863	0.0433008	-0.570436			-0.119288	-0.130434	0.313163	0.0118443	-0.177189	-0.264445	-0.490948	0.315268	0.0768894	-0.112119	-0.41088	0.294774	0.329754	0.1463	-0.27417	0.695911	0.0902911	0.0826487	0.261493	0.0861596					0.545657	-0.144368	0.0449808	-0.309499	0.146932	5.79306e-05
0.0613753	-0.35064	-0.847548	-0.0713241	-0.470978	-0.601684	0.179192	-0.12935	-0.230907	0.221936	0.0999296	-1.80556	-0.751129	-0.637462	0.000258339	0.646026	0.0369112	-0.551393			-0.0897104	-0.125128	0.313586	0.0179147	-0.16786	-0.30297	-0.579419	0.127037	-0.115174	-0.105788	-0.46217	0.297796	0.323255	0.158444	-0.201843	0.6789	0.0744314	0.0778106	0.260708	0.0851685					0.524588	-0.146229	0.0512494	-0.292846	0.142071	-0.000137136
0.069124	-0.327252	-0.792795	-0.0706301	-0.412665	-0.601151	0.199259	-0.107454	-0.251165	0.305203	0.125237	-1.80256	-0.750482	-0.410439	0.00451076	0.658842	0.0116332	-0.540047			-0.0723303	-0.125202	0.359856	0.0258162	-0.19578	-0.329607	-0.764102	0.0281468	-0.0815386	-0.109482	-0.517836	0.334846	0.340321	0.180827	-0.220088	0.625344	0.0737326	0.0723678	0.259863	0.0845745					0.570633	-0.147635	0.0492789	-0.286846	0.13781	-0.000634747
0.0704859	-0.311304	-0.702918	-0.0686612	-0.497149	-0.593472	0.149935	-0.110477	-0.290084	0.273944	0.150731	-1.7912	-0.758672	-0.360877	-0.00287173	0.661671	0.0533993	-0.527097			-0.0791601	-0.146732	0.280133	0.0291858	-0.196351	-0.354379	-0.544718	0.0832282	-0.0904474	-0.104934	-0.578451	0.324052	0.322331	0.170022	-0.203579	0.618194	0.0678161	0.0409762	0.257578	0.085831					0.667069	-0.141512	0.0460843	-0.280981	0.133048	0.00226015
0.0743034	-0.284016	-0.605321	-0.0524411	-0.480513	-0.587847	0.222282	-0.117768	-0.354087	0.340392	0.18079	-1.7718	-0.743952	-0.357201	-0.00639805	0.607376	0.0159052	-0.509355			-0.0756974	-0.17573	0.385213	0.0206494	-0.208958	-0.36062	-0.489653	0.034454	-0.364901	-0.114789	-0.604563	0.300485	0.346083	0.149813	-0.252245	0.578033	0.066492	0.0792418	0.256852	0.0827838					0.589612	-0.159428	0.0436614	-0.285478	0.127689	0.00201505
0.0446716	-0.257098	-0.53174	-0.0428291	-0.453714	-0.581805	0.240665	-0.129248	-0.319744	0.252444	0.194599	-1.73428	-0.729311	-0.197795	0.0198887	0.540795	-0.0974391	-0.491781			-0.093011	-0.163615	0.286181	-0.0125426	-0.2026	-0.370185	-0.489937	0.230672	-0.335593	-0.112177	-0.58741	0.27249	0.341864	0.15747	-0.257711	0.530386	0.0524634	0.059571	0.254653	0.0815459					0.583436	-0.168361	0.0525034	-0.267618	0.125507	0.00171458
0.0485094	-0.234397	-0.457978	-0.0492531	-0.43007	-0.580115	0.24549	-0.113413	-0.383524	0.276286	0.189413	-1.68489	-0.722731	-0.0651406	0.00791978	0.469803	-0.136809	-0.477896			-0.0695355	-0.15769	0.280071	0.00590786	-0.196597	-0.362589	-0.545528	0.314984	-0.592344	-0.112661	-0.583003	0.24851	0.326894	0.145398	-0.279623	0.481961	0.0590311	0.0388876	0.255223	0.0802668					0.634961	-0.167501	0.0543195	-0.24035	0.122599	0.0021736
0.0580914	-0.179526	-0.416874	-0.0426581	-0.430633	-0.578509	0.165939	-0.119644	-0.34693	0.244647	0.193323	-1.62321	-0.638039	0.0665974	0.0041015	0.443179	-0.14597	-0.466542			-0.141174	-0.144106	-0.0924457	0.00934225	-0.184024	-0.335355	-0.58744	0.44301	-0.556179	-0.114184	-0.580694	0.193626	0.346111	0.139268	-0.215039	0.451057	0.068527	0.0265431	0.25277	0.0809698					0.558087	-0.164919	0.0536744	-0.251234	0.121569	0.00264653
0.0431851	-0.158438	-0.348142	-0.0487655	-0.45068	-0.57549	0.369846	-0.0921803	-0.32764	0.205994	0.178594	-1.55208	-0.652983	0.0699556	0.00660726	0.447602	0.0841162	-0.474426			-0.137003	-0.142631	-0.425683	0.016733	-0.181795	-0.273044	-0.746456	0.38633	-0.553489	-0.121906	-0.580362	0.212696	0.33486	0.119484	-0.205619	0.429764	0.0950561	0.0503581	0.251521	0.0803468					0.5555	-0.165907	0.0752549	-0.23253	0.120125	0.00212362
0.0499145	-0.139646	-0.312846	-0.0454222	-0.421867	-0.571977	0.434878	-0.119655	-0.302779	0.122621	0.18201	-1.48917	-0.653386	-0.0789316	0.00957892	0.453606	0.110949	-0.476793			-0.119318	-0.139045	-0.349213	0.0160674	-0.188622	-0.204687	-0.809394	0.381847	-0.510025	-0.115586	-0.567437	0.21924	0.337878	0.128595	-0.199549	0.374544	0.0879604	0.101122	0.248248	0.0793703					0.678991	-0.158468	0.066038	-0.230066	0.119328	0.00182668
0.0239815	-0.138007	-0.260068	-0.0322287	-0.432994	-0.564927	0.5417	-0.118325	-0.338978	0.0831635	0.134468	-1.41284	-0.606748	-0.0882095	-0.00273433	0.459063	-0.00313264	-0.47152			-0.122595	-0.123865	-0.692821	-0.000434346	-0.162417	-0.139325	-0.871872	0.341456	-0.472073	-0.100625	-0.571634	0.213342	0.311746	0.09705	-0.124065	0.339791	0.0837391	0.119603	0.246304	0.0799562					0.675607	-0.166463	0.0710038	-0.224133	0.116727	0.00354895
-0.00710801	-0.154038	-0.228851	-0.0218621	-0.364346	-0.561102	0.620607	-0.12315	-0.279902	0.0196182	0.0662845	-1.33602	-0.592416	-0.109808	-0.00205194	0.473988	-0.142364	-0.466982			-0.0844402	-0.0973649	-0.944121	-0.00025422	-0.157369	-0.0727679	-1.11755	0.351713	-0.732831	-0.0883512	-0.557701	0.210818	0.330642	0.103102	-0.168533	0.297747	0.0847049	0.172727	0.242456	0.079841					0.578084	-0.175415	0.076597	-0.221304	0.116028	-0.000247958
-0.00195829	-0.157798	-0.193442	-0.0340761	-0.319087	-0.563173	0.653292	-0.0913144	-0.223396	-0.0389436	0.061401	-1.25524	-0.606966	-0.104349	0.0045197	0.545751	-0.10875	-0.451629			-0.0394607	-0.0676351	-1.02996	-0.00174246	-0.166507	-0.0577818	-1.05435	0.0324238	-0.669812	-0.0841257	-0.573889	0.226385	0.308499	0.0847796	-0.147762	0.274535	0.0781742	0.187813	0.238358	0.0822863					0.620634	-0.18053	0.0843977	-0.195933	0.111879	-0.000891787
0.0282137	-0.175817	-0.193976	-0.0492182	-0.299253	-0.561385	0.658515	-0.0610535	-0.255537	-0.0269298	0.0881314	-1.18439	-0.59522	-0.079893	-0.0309852	0.621568	-0.210129	-0.439504			0.01228	-0.0557465	-1.16729	0.0218769	-0.175569	-0.0171583	-0.977303	-0.0222947	-0.679963	-0.0880276	-0.586435	0.232376	0.302982	0.0962739	-0.14421	0.286871	0.0850536	0.202613	0.235939	0.0851631					0.710201	-0.174495	0.0740231	-0.185634	0.108534	-0.00176374
-0.00425118	-0.191455	-0.161501	-0.0632387	-0.289001	-0.558726	0.572059	-0.0616427	-0.220171	0.00114773	0.0227467	-1.11097	-0.598157	-0.0118642	0.00143536	0.699216	-0.342301	-0.423775			0.00190246	-0.0198632	-1.20307	0.000715229	-0.195112	-0.0167725	-0.840142	-0.277772	-0.676345	-0.0880529	-0.53881	0.260622	0.295825	0.123586	-0.0770051	0.298642	0.0842465	0.213522	0.232049	0.0836623					0.706815	-0.179963	0.0801098	-0.173896	0.107859	-0.000660977
-0.00522694	-0.245436	-0.137484	-0.111269	-0.287745	-0.551963	0.624346	-0.0398153	-0.254145	0.0895604	0.0235214	-1.04678	-0.651258	0.0156703	-4.6254e-05	0.770781	-0.348277	-0.406846			-0.0269675	0.00200013	-1.22733	0.0012008	-0.211012	-0.0216818	-0.85328	-0.288426	-0.639017	-0.0902225	-0.547104	0.335235	0.288865	0.108318	-0.141499	0.303682	0.0773575	0.247708	0.228955	0.0816366					0.854763	-0.196046	0.0836879	-0.155264	0.108194	0.00203585
0.0136077	-0.262889	-0.132828	-0.136481	-0.287863	-0.550062	0.442201	-0.0469245	-0.21047	0.0336042	0.00669274	-0.981421	-0.647642	-0.0595982	0.0253788	0.776656	-0.562206	-0.392807			0.0220972	0.00969596	-1.13467	0.00548233	-0.231761	-0.0389863	-0.781982	-0.231467	-0.613993	-0.0817607	-0.491507	0.294249	0.281461	0.0949817	-0.131313	0.304033	0.0687091	0.281172	0.223973	0.0846936					0.865748	-0.189938	0.0716667	-0.151023	0.107641	0.0043308
-0.0199403	-0.202363	-0.100097	-0.156536	-0.300237	-0.545832	0.439995	-0.0323808	-0.226218	0.11858	0.0209024	-0.879603	-0.627354	0.137627	0.0417305	0.791375	-0.558254	-0.369239			0.043115	0.0181566	-1.16925	0.0336038	-0.212511	-0.0371659	-0.741671	-0.26599	-0.640867	-0.0822284	-0.437735	0.254679	0.283302	0.0884769	-0.175325	0.313044	0.0798243	0.259408	0.220338	0.0867318					0.871478	-0.195979	0.0745448	-0.144061	0.104773	0.00515658
0.0105483	-0.13091	-0.0769954	-0.17134	-0.328875	-0.543391	0.433642	-0.0140294	-0.197694	0.103587	0.0907483	-0.799857	-0.63915	0.186774	0.0397489	0.819535	-0.656629	-0.36728			0.0111746	0.0212945	-1.06387	0.0504304	-0.241975	-0.0814853	-0.603185	0.0923236	-0.395736	-0.0952029	-0.370645	0.256211	0.296992	0.0853701	-0.234175	0.337661	0.0879272	0.296457	0.216561	0.087301					0.866906	-0.196483	0.0653805	-0.147764	0.104506	0.00926474
0.0519967	-0.0496088	-0.0807751	-0.185316	-0.359224	-0.543642	0.483045	0.00367344	-0.21177	0.133991	0.185822	-0.715854	-0.638375	0.233573	0.0361602	0.882111	-0.549104	-0.359806			-0.00477975	0.0264565	-0.970691	0.0498659	-0.266658	-0.117299	-0.662116	-0.0693723	-0.39999	-0.107571	-0.320221	0.281135	0.305095	0.0736039	-0.2324	0.353821	0.0942303	0.264045	0.232786	0.08529					0.873695	-0.189544	0.0632686	-0.142374	0.105127	0.0102905
0.0225582	-0.00545585	-0.086877	-0.183243	-0.388826	-0.541559	0.487041	-0.0405575	-0.166998	0.142195	0.179397	-0.632881	-0.597201	0.258968	0.0250099	1.00189	-0.632555	-0.358938			-0.0705139	0.0282619	-1.27085	0.0414755	-0.265608	-0.158647	-0.742155	0.0645955	-0.435621	-0.10427	-0.252826	0.293182	0.304375	0.066308	-0.232463	0.361444	0.0997866	0.26422	0.228562	0.0838843					0.983084	-0.191068	0.0723337	-0.141865	0.106869	0.0107944
-0.00216124	0.0673821	-0.0405973	-0.176001	-0.408528	-0.543421	0.558338	-0.0504985	-0.150685	0.192217	0.206672	-0.484981	-0.584762	0.235771	0.0191992	1.11187	-0.32009	-0.356941			-0.109006	0.0488745	-1.26656	0.0430755	-0.261259	-0.190975	-0.72698	0.0520145	-0.41973	-0.107711	-0.243874	0.304185	0.310211	0.0422996	-0.227235	0.361213	0.0886644	0.268755	0.22393	0.0826151					0.903398	-0.197367	0.0789916	-0.133424	0.104994	0.0116545
-0.00124702	0.152147	-0.0381423	-0.145816	-0.429765	-0.542436	0.641193	-0.0727809	-0.142623	0.125731	0.294506	-0.392131	-0.573734	0.238388	-0.0171512	1.24265	-0.218389	-0.352823			-0.0787221	0.0342991	-0.915484	0.0464691	-0.231295	-0.197413	-0.744609	-9.29676e-05	-0.449331	-0.102561	-0.284402	0.274636	0.298091	0.0356507	-0.262934	0.377434	0.084915	0.275176	0.220392	0.0826776					0.865525	-0.196376	0.0773089	-0.143155	0.103869	0.0117298
0.00412336	0.255884	-0.0264436	-0.0857209	-0.437855	-0.544964	0.608962	-0.0530857	-0.143987	0.0440198	0.275586	-0.315777	-0.571136	0.243477	-0.0253449	1.26341	-0.183717	-0.348087			0.0148578	0.0243643	-0.772577	0.0487961	-0.221115	-0.188227	-0.678796	0.332139	-0.500146	-0.101767	-0.271943	0.232113	0.298593	0.0715513	-0.250706	0.368509	0.102344	0.252221	0.216202	0.0824304					0.762985	-0.196455	0.0767164	-0.141324	0.101807	0.00833345
-0.0230832	0.356489	0.0193084	-0.0366946	-0.444575	-0.542743	0.556725	-0.0358835	-0.17319	0.0459291	0.278361	-0.261167	-0.497806	0.325611	-0.0598577	1.33031	-0.199873	-0.332795			0.0153763	0.025807	-0.827425	0.0523239	-0.201553	-0.185368	-0.553071	0.154094	-0.444366	-0.100819	-0.311668	0.279714	0.29827	0.0780236	-0.252256	0.378711	0.0940098	0.254325	0.214342	0.0805588					0.764947	-0.201781	0.0839893	-0.133641	0.0984749	0.00860243
-0.0193635	0.37605	0.00701954	-0.0147502	-0.451196	-0.543405	0.557479	-0.0109675	-0.160583	-0.00886628	0.249819	-0.230653	-0.486692	0.300026	-0.093221	1.38947	-0.204559	-0.323263			0.0352945	0.0320561	-0.629713	0.0309994	-0.21843	-0.227152	-0.460347	0.19998	-0.422601	-0.105056	-0.344483	0.345327	0.294781	0.0964172	-0.241796	0.380575	0.0903439	0.287249	0.210071	0.0790978					0.665801	-0.190841	0.0840508	-0.119362	0.0998659	0.00884971
-0.0571678	0.392483	-0.0177379	0.0107209	-0.450232	-0.543441	0.603898	-0.016324	-0.161116	-0.0236568	0.204093	-0.215832	-0.506975	0.26429	-0.0984437	1.38599	-0.146963	-0.307766			0.0866957	0.0495368	-0.612952	0.0249518	-0.207875	-0.253717	-0.456027	-0.0226147	-0.657349	-0.105354	-0.376097	0.348965	0.29512	0.127242	-0.232376	0.361698	0.0815678	0.263549	0.205326	0.0768026					0.680618	-0.181001	0.100361	-0.115912	0.0978885	0.00317826
-0.0903312	0.403514	0.0325241	0.0351505	-0.453266	-0.541969	0.598216	-0.0182771	-0.158771	-0.0471588	0.151619	-0.206609	-0.501817	0.0793695	-0.102522	1.40605	-0.11236	-0.287123			0.0667606	0.0378677	-0.626611	0.0214891	-0.18688	-0.280403	-0.391762	0.103313	-0.603764	-0.102441	-0.402856	0.331703	0.264608	0.119438	-0.215002	0.36149	0.0882483	0.296782	0.183077	0.0771237					0.770435	-0.182187	0.10433	-0.127233	0.0939272	0.00150972
-0.0907371	0.395815	0.0150576	0.0688193	-0.385444	-0.539902	0.614062	0.0143175	-0.196729	-0.0539435	0.130439	-0.209301	-0.461141	-0.0797616	-0.10473	1.36235	-0.0214276	-0.266728			0.136275	0.0601205	-0.582047	0.0314115	-0.182926	-0.255143	-0.363188	0.400954	-0.544598	-0.103474	-0.422241	0.33368	0.284819	0.1736	-0.202938	0.34326	0.0840863	0.295621	0.180572	0.0760414					0.625782	-0.172216	0.0954904	-0.121313	0.0913715	0.00163711
-0.0909867	0.379812	-0.00339644	0.123602	-0.318558	-0.538776	0.609926	0.0158843	-0.206685	-0.10913	0.0466711	-0.273944	-0.465006	-0.242985	-0.0996894	1.31728	-0.312615	-0.244952			0.108135	0.0482375	-0.483166	0.0274075	-0.178178	-0.261152	-0.273024	0.404304	-0.54707	-0.093648	-0.39161	0.370817	0.280432	0.187441	-0.120983	0.385812	0.0880668	0.29607	0.178764	0.0745302					0.618659	-0.161343	0.0968387	-0.122052	0.0894949	0.000782127
-0.0876255	0.345695	-0.0213476	0.160298	-0.269763	-0.536718	0.609892	0.0289459	-0.190472	-0.114364	-0.0181572	-0.319552	-0.453756	-0.289915	-0.0945061	1.23077	0.118706	-0.224604			0.0908702	0.0842843	-0.742789	0.0282249	-0.186172	-0.285749	-0.261506	0.666849	-0.509985	-0.10116	-0.354062	0.389708	0.30433	0.161094	-0.145423	0.359117	0.0867147	0.323814	0.195029	0.07311					0.63365	-0.151667	0.0939792	-0.103044	0.0880483	-0.000717599
-0.123478	0.318416	-0.0240478	0.109464	-0.249927	-0.534626	0.65342	0.000416197	-0.13343	-0.0630283	-0.0692068	-0.328769	-0.435963	-0.302563	-0.0873594	1.2385	0.139115	-0.213074			0.0649683	0.0859629	-0.773357	0.035257	-0.197727	-0.325486	-0.284729	0.343004	-0.478443	-0.103251	-0.305812	0.407889	0.29497	0.148935	-0.153025	0.360077	0.0815203	0.352392	0.193959	0.0765384					0.6469	-0.143379	0.101999	-0.0913168	0.0850944	0.00140205
-0.119491	0.308394	-0.0645219	0.125944	-0.241642	-0.535349	0.676488	-0.0217397	-0.0854132	-0.0282695	-0.0621819	-0.347084	-0.43324	-0.263012	-0.0869141	1.28645	0.24593	-0.202116			0.0386568	0.0928033	-0.748935	0.0451727	-0.197875	-0.372202	-0.371352	0.261406	-0.537013	-0.104568	-0.293888	0.399491	0.294017	0.171253	-0.165674	0.37582	0.0808325	0.327698	0.191019	0.0753276					0.660125	-0.126981	0.115234	-0.092937	0.0835413	-1.78973e-05
-0.118674	0.274624	-0.0868111	0.156134	-0.184385	-0.535852	0.682983	-0.0479199	-0.0339632	0.0132305	-0.0564252	-0.378507	-0.442661	-0.232895	-0.0837916	1.31458	0.363066	-0.184077			-0.0125924	0.0869464	-0.867075	0.0698433	-0.193554	-0.376611	-0.487539	0.279175	-0.554511	-0.0912321	-0.297488	0.373875	0.304063	0.149006	-0.087953	0.395394	0.0865751	0.30143	0.190546	0.0747246					0.693665	-0.126638	0.116294	-0.0971071	0.0792786	-0.000526771
-0.110988	0.229462	-0.0526021	0.166363	-0.176776	-0.53272	0.610982	-0.0735583	0.011527	0.0694512	-0.028076	-0.383418	-0.420622	-0.237038	-0.0519901	1.38638	0.432468	-0.181361			-0.0274838	0.0717295	-0.832442	0.0727691	-0.186874	-0.365365	-0.496496	0.381741	-0.576303	-0.0917314	-0.307416	0.36801	0.295449	0.139721	-0.0487467	0.411929	0.0805827	0.304556	0.210169	0.074942					0.68034	-0.11684	0.120904	-0.0835145	0.0777858	0.00080293
-0.113998	0.196497	-0.0867443	0.180798	-0.121375	-0.529436	0.591306	-0.0972603	0.0664408	0.132319	-0.0435627	-0.383981	-0.412454	-0.0849265	-0.0477919	1.38457	0.487784	-0.174705			-0.0840733	0.0918101	-0.716698	0.0707326	-0.184575	-0.342037	-0.466351	0.34924	-0.600432	-0.0935104	-0.31123	0.421198	0.294158	0.152237	-0.0116628	0.385184	0.0672356	0.282422	0.208731	0.0763619					0.573129	-0.108593	0.127597	-0.0539427	0.0780769	0.00133226
-0.107651	0.200896	-0.0586409	0.174391	-0.0956486	-0.529105	0.615528	-0.123575	0.135551	0.193053	-0.0456049	-0.366867	-0.474613	0.080258	-0.0445658	1.41712	0.499357	-0.16726			-0.12385	0.0776301	-0.653265	0.0629532	-0.166059	-0.37222	-0.443324	0.0909058	-0.607909	-0.0931576	-0.332144	0.394684	0.273943	0.161531	0.0378982	0.399448	0.0724475	0.260194	0.209841	0.0762747					0.576442	-0.0978991	0.146559	-0.0551039	0.0764471	0.00287943
-0.0997973	0.187243	-0.0760867	0.144874	-0.135503	-0.523356	0.590772	-0.149461	0.206909	0.281759	-0.0255736	-0.362693	-0.472782	0.278576	-0.0411447	1.49653	0.659087	-0.159069			-0.085747	0.0797979	-0.632304	0.0584578	-0.160674	-0.342651	0.131841	0.365216	-0.611022	-0.110436	-0.355734	0.426693	0.300921	0.196772	-0.0456227	0.348469	0.0700131	0.263526	0.210143	0.0739877					0.657916	-0.0888763	0.16323	-0.0504497	0.0793176	0.0045434
-0.095574	0.209532	-0.0369059	0.115595	-0.113654	-0.520268	0.632352	-0.168304	0.23126	0.364316	-0.0314851	-0.33265	-0.480668	0.286681	-0.0390701	1.48074	0.207074	-0.146299			-0.0702892	0.0394717	-0.591743	0.0664434	-0.157303	-0.349489	0.0919955	0.3333	-0.58086	-0.110804	-0.380272	0.439115	0.298127	0.244195	-0.0282539	0.326553	0.0664002	0.237461	0.208505	0.0771737					0.661473	-0.077115	0.180162	-0.0563255	0.077278	0.00514046
-0.0911753	0.232371	-0.00989425	0.169954	-0.0143799	-0.514109	0.66169	-0.181162	0.237179	0.333244	-0.0239098	-0.308858	-0.506629	0.170725	-0.038147	1.4971	0.186006	-0.12537			-0.108898	0.0267301	-0.6147	0.0747626	-0.17166	-0.358308	0.140598	0.41879	-0.58642	-0.109272	-0.382749	0.452538	0.297906	0.238886	-0.0204442	0.297399	0.065155	0.214964	0.209202	0.0775528					0.629971	-0.0680177	0.186566	-0.0607811	0.076676	0.00235271
-0.0920456	0.245848	0.0216633	0.156693	0.143239	-0.509517	0.714163	-0.196644	0.259982	0.405203	-0.0925314	-0.280997	-0.575915	0.158451	-0.0307504	1.50709	0.268813	-0.0974982			-0.117004	0.0469619	-0.598894	0.0715771	-0.166595	-0.357528	0.211213	0.450005	-0.585142	-0.108874	-0.37402	0.43706	0.293415	0.250199	-0.000845862	0.274643	0.0669373	0.213589	0.210076	0.0803898					0.592305	-0.0625816	0.186816	-0.0475446	0.0756881	0.00344001
-0.0898497	0.278702	0.0564056	0.142418	0.179434	-0.504276	0.758846	-0.210903	0.237771	0.36481	-0.180737	-0.232855	-0.57588	0.123264	-0.0249941	1.50547	0.202053	-0.0787831			-0.118055	0.0732445	-0.503141	0.0706779	-0.173171	-0.36593	0.297291	0.533721	-0.580017	-0.121584	-0.35684	0.481249	0.301651	0.232504	-0.0846834	0.213272	0.0592743	0.238134	0.2096	0.0809046					0.539725	-0.0537606	0.196782	-0.053894	0.0763685	0.00586198
-0.0884641	0.271055	0.0408746	0.132642	0.291445	-0.49857	0.797035	-0.23079	0.234049	0.41828	-0.270674	-0.159423	-0.562734	0.149496	-0.0458185	1.52053	0.318456	-0.0484262			-0.133184	0.110277	-0.562874	0.0926692	-0.190422	-0.361917	0.301436	0.282888	-0.590997	-0.116245	-0.347518	0.51058	0.2981	0.229905	-0.140789	0.203259	0.0668275	0.2355	0.20807	0.0819336					0.577521	-0.0417439	0.200889	-0.0462215	0.0775026	0.00537851
-0.0812751	0.26756	0.0481104	0.112058	0.418277	-0.492449	0.779692	-0.249406	0.190746	0.361054	-0.343702	-0.0951664	-0.564119	-0.00938181	-0.0433661	1.56969	0.528214	-0.0254088			-0.0564169	0.0951055	-0.496954	0.11524	-0.222075	-0.371064	0.169075	0.247391	-0.563516	-0.11294	-0.322247	0.502779	0.314779	0.238132	-0.178535	0.197487	0.0640005	0.235335	0.207814	0.0823074					0.598811	-0.033858	0.194289	-0.0572146	0.0796124	0.00669883
-0.0796959	0.25389	0.0535688	0.077797	0.421096	-0.482211	0.711225	-0.262888	0.138906	0.390198	-0.431748	-0.0383467	-0.567155	-0.126459	-0.0394056	1.58831	0.798548	0.00529179			-0.00440242	0.0971317	-0.530299	0.123906	-0.249747	-0.360974	0.0771983	0.281941	-0.492495	-0.114412	-0.275956	0.536305	0.318177	0.203103	-0.217077	0.211929	0.0676444	0.263305	0.206441	0.0830372					0.640975	-0.0261809	0.171875	-0.0467093	0.0830519	0.00634589
-0.0763685	0.254373	0.066248	0.0492693	0.534436	-0.477611	0.728121	-0.239425	0.127306	0.306264	-0.522074	0.0161773	-0.499474	-0.345872	-0.0379279	1.51538	1.03356	0.0243885			-0.057563	0.0910037	-0.582791	0.142845	-0.261322	-0.417178	-0.658647	0.240976	-0.39365	-0.0981783	-0.223312	0.514166	0.288198	0.175197	-0.200017	0.232661	0.0820132	0.262706	0.206018	0.0897608					0.565347	-0.0203239	0.152126	-0.0447599	0.0819826	0.00712114
-0.0742128	0.231146	0.0483594	0.0184181	0.64133	-0.471358	0.698073	-0.213827	0.142164	0.281225	-0.578433	0.0727521	-0.495974	-0.369021	-0.0291158	1.56539	1.27881	0.0528			-0.0842681	0.113333	-0.55178	0.145832	-0.256845	-0.410733	-0.702525	0.313111	-0.256664	-0.0983196	-0.185948	0.503461	0.288909	0.128951	-0.2032	0.234074	0.0876397	0.261865	0.207924	0.0902995					0.521722	-0.0175044	0.147567	-0.0479107	0.0850795	0.00694478
-0.0716179	0.209488	0.00874811	-0.0176493	0.598166	-0.467518	0.654508	-0.207731	0.106894	0.347442	-0.625705	0.0871663	-0.491289	-0.233251	-0.0294021	1.53993	1.3847	0.0716522			-0.0711317	0.1482	-0.492097	0.135368	-0.224777	-0.349348	-0.256568	0.378365	-0.14398	-0.0928783	-0.189408	0.502198	0.287795	0.133806	-0.1504	0.240358	0.0812743	0.256004	0.207722	0.087214					0.540917	-0.013424	0.140226	-0.0404963	0.0888183	0.00711854
-0.0675126	0.188225	-0.0304551	-0.0579121	0.587488	-0.465145	0.619241	-0.183478	0.0950092	0.228592	-0.678046	0.133266	-0.477662	-0.232296	-0.0205212	1.48549	1.22136	0.0810748			-0.091966	0.147235	-0.431086	0.128666	-0.240439	-0.333899	-0.307534	0.517163	-0.00969586	-0.0934797	-0.182553	0.486077	0.303628	0.102459	-0.16288	0.211633	0.0884634	0.258885	0.225387	0.0848295					0.558942	-0.00923932	0.128664	-0.0440065	0.0924534	0.00569787
-0.0659414	0.164096	-0.0594813	-0.101605	0.676981	-0.464394	0.552202	-0.194417	0.0878845	0.287791	-0.703156	0.160099	-0.403202	-0.180825	-0.0149036	1.52013	1.10664	0.0924			-0.134966	0.137545	-0.517074	0.129171	-0.2493	-0.329532	-0.301876	0.392455	0.232291	-0.0956647	-0.174114	0.456287	0.309619	0.122142	-0.160424	0.260309	0.0893444	0.230673	0.225068	0.0867849					0.578607	-0.00849775	0.118734	-0.0312505	0.0960882	0.00367125
-0.0714125	0.203968	-0.0710732	-0.161419	0.721548	-0.469798	0.518191	-0.198549	0.08347	0.250688	-0.761622	0.202	-0.422608	-0.163496	-0.0122639	1.44658	1.30144	0.106958			-0.206266	0.101287	-0.514497	0.124631	-0.245655	-0.337745	-0.322617	0.507395	0.479491	-0.100912	-0.147587	0.456517	0.312865	0.10112	-0.10732	0.264945	0.0789365	0.231371	0.22527	0.087814					0.531815	0.000497479	0.101895	-0.0172808	0.0990779	0.00584602
-0.0803019	0.227678	-0.0946506	-0.228596	0.677797	-0.479196	0.5469	-0.17076	0.104884	0.311738	-0.788619	0.269083	-0.349724	0.0204483	-0.00755875	1.40691	0.972869	0.122022			-0.175465	0.114136	-0.636713	0.140699	-0.241163	-0.347686	-0.312034	0.581994	0.619969	-0.107053	-0.147157	0.424498	0.30736	0.0803866	-0.143263	0.253063	0.0801401	0.23619	0.224466	0.0910022					0.506607	0.0174181	0.0809081	-0.0117712	0.102548	0.00436508
-0.0699736	0.267757	-0.107079	-0.282307	0.689367	-0.488581	0.547153	-0.158782	0.106345	0.277032	-0.813623	0.311237	-0.271421	0.192025	-0.00812068	1.34201	1.09794	0.128697			-0.245383	0.109913	-0.582058	0.150647	-0.230169	-0.342093	-0.278744	0.506034	0.674249	-0.104114	-0.156667	0.439682	0.30088	0.0856665	-0.16089	0.229029	0.076005	0.211858	0.224876	0.0926785					0.476615	0.0261303	0.0841667	-0.00859662	0.104798	0.00305534
-0.0787055	0.301111	-0.131214	-0.32847	0.745008	-0.495734	0.52907	-0.177039	0.0640674	0.336833	-0.837422	0.383862	-0.338112	0.373015	-0.00866007	1.32063	0.710393	0.147376			-0.14991	0.101032	-0.493154	0.149529	-0.229305	-0.300957	-0.309271	0.26958	0.765389	-0.0977192	-0.204368	0.412262	0.323227	0.068735	-0.145743	0.204468	0.0620947	0.218158	0.224063	0.0900836					0.450842	0.045932	0.0717901	0.00172976	0.108998	0.00117505
-0.0938287	0.293061	-0.13527	-0.365634	0.74771	-0.503162	0.590576	-0.198507	0.0436476	0.352064	-0.864289	0.413511	-0.262499	0.423474	0.0167817	1.25947	0.912362	0.149876			-0.126416	0.0943941	-0.488585	0.139514	-0.241824	-0.291847	-0.263803	0.0521779	0.767355	-0.0979179	-0.200002	0.413692	0.304748	0.080765	-0.144174	0.232455	0.0485521	0.225618	0.221005	0.0863832					0.527928	0.0575224	0.0575684	0.00922979	0.115175	0.00127153
-0.0873436	0.278066	-0.12941	-0.402864	0.854892	-0.505984	0.623232	-0.205367	0.0494581	0.326987	-0.89112	0.523973	-0.189451	0.453426	0.0182822	1.2444	1.01448	0.163978			-0.062598	0.0610189	-0.496002	0.149795	-0.238618	-0.320348	-0.74139	-0.129141	0.829642	-0.100548	-0.197411	0.394196	0.300095	0.0874865	-0.141786	0.28457	0.0542754	0.231112	0.23623	0.084456					0.526982	0.0608219	0.0605166	0.016828	0.120552	0.00134189
-0.0904387	0.257415	-0.135308	-0.430161	0.886909	-0.513051	0.694584	-0.230762	0.0577867	0.41017	-0.904622	0.635264	-0.113497	0.420279	0.00957489	1.17635	0.936867	0.188188			-0.00702388	0.052554	-0.551927	0.149786	-0.234533	-0.309473	-0.790775	-0.262793	0.663061	-0.104201	-0.181111	0.426663	0.283299	0.0706953	-0.0868219	0.325626	0.0657167	0.237197	0.214144	0.0847057					0.47707	0.0706998	0.0610129	0.0204181	0.131531	0.00138537
-0.0970842	0.268774	-0.104161	-0.450925	0.882561	-0.522785	0.717148	-0.180929	0.0991047	0.404172	-0.921264	0.750249	-0.180531	0.411484	0.00471012	1.10284	1.3993	0.196706			-0.0111912	0.0196182	-0.671641	0.166493	-0.223544	-0.273306	-0.833771	-0.113263	0.603017	-0.114409	-0.199489	0.440517	0.258517	0.0788888	-0.0340779	0.318827	0.0719084	0.246852	0.211231	0.0840479					0.478505	0.0902569	0.0493516	0.0311958	0.144114	0.00462336
-0.0959811	0.275964	-0.0391787	-0.469746	0.904042	-0.527509	0.750777	-0.159435	0.0792623	0.426613	-0.912009	0.823562	-0.107427	0.347651	-0.00181502	1.08837	1.44845	0.208862			0.0986694	0.0193488	-0.631802	0.14889	-0.205827	-0.244949	-0.850605	-0.129231	0.458062	-0.105989	-0.187014	0.423221	0.26085	0.0947618	-0.0495598	0.320536	0.0943279	0.25731	0.208889	0.0857046					0.4998	0.085211	0.0407871	0.0169266	0.162772	0.00320511
-0.0915829	0.274633	0.0132666	-0.471736	0.956996	-0.524734	0.780955	-0.181217	0.0556858	0.443591	-0.922319	0.855277	-0.177936	0.334345	-0.00597033	1.01555	1.49009	0.226232			0.0191943	0.0353366	-0.63166	0.127869	-0.177892	-0.213224	-0.783757	-0.197166	0.405634	-0.0979306	-0.163477	0.42745	0.258536	0.0947377	-0.011059	0.340174	0.104662	0.262165	0.205979	0.0846675					0.56499	0.0794238	0.0508046	0.0246654	0.178418	0.00575076
-0.111523	0.253221	0.0732727	-0.485501	1.04428	-0.520077	0.809056	-0.155241	0.02815	0.453245	-0.909609	0.97255	-0.168127	0.257157	-0.00371287	0.977737	1.07864	0.239954			-0.00723446	0.0434204	-0.653657	0.134878	-0.175389	-0.194956	-0.744666	-0.140188	0.448751	-0.084126	-0.198066	0.446183	0.26052	0.103868	0.0280073	0.346766	0.0957038	0.267323	0.202295	0.0845451					0.585861	0.0747598	0.0492024	0.0201215	0.205549	0.00576461
-0.113375	0.236555	0.131626	-0.507403	1.03414	-0.514376	0.813664	-0.162049	0.0292556	0.411353	-0.88358	1.05549	-0.161612	0.219419	-0.005004	0.958136	1.18472	0.251224			-0.0371958	0.0669501	-0.717991	0.132849	-0.187252	-0.188941	-0.688281	-0.089098	0.198013	-0.0872573	-0.202368	0.461512	0.24815	0.135645	0.0156719	0.389955	0.101203	0.265949	0.218845	0.0859					0.612148	0.0639345	0.0445454	0.019537	0.233606	0.00519881
-0.0964256	0.265121	0.153462	-0.535815	1.02945	-0.511097	0.735273	-0.159347	0.00828969	0.402803	-0.88114	1.12857	-0.148486	0.198267	-0.0381832	0.93183	1.05409	0.270851			-0.080975	0.0691894	-0.769229	0.151383	-0.193413	-0.175866	-0.701648	-0.287511	0.162314	-0.0808651	-0.19604	0.456756	0.253145	0.145411	0.0126784	0.391064	0.129416	0.264791	0.198227	0.0895875					0.598199	0.0667068	0.0381325	0.0348135	0.259634	0.00413051
-0.110333	0.305281	0.18807	-0.569437	1.04975	-0.509612	0.756921	-0.123859	0.0154762	0.426476	-0.873705	1.21181	-0.136793	0.0172938	-0.0385309	0.914796	0.993322	0.28861			-0.0914401	0.0913218	-0.827342	0.149863	-0.223937	-0.178788	-0.720859	-0.116396	0.0643999	-0.0824141	-0.173707	0.437757	0.273557	0.121333	-0.0251502	0.401229	0.129754	0.264076	0.195664	0.0931221					0.64389	0.07881	0.0173598	0.0413694	0.285205	0.0055592
-0.117202	0.297308	0.216508	-0.586332	1.10313	-0.495036	0.779944	-0.0864032	-0.0269418	0.420515	-0.853427	1.18678	-0.209161	-0.104421	-0.0367167	0.933586	1.02065	0.295822			-0.0980821	0.0926828	-0.84061	0.162437	-0.204237	-0.191812	-0.722101	-0.205774	0.259292	-0.0803287	-0.144473	0.427859	0.298122	0.141425	-0.0507669	0.400325	0.122112	0.261945	0.212614	0.096061					0.661399	0.0769533	-0.000323692	0.047944	0.307109	0.00599625
-0.119401	0.263001	0.199025	-0.572152	1.12686	-0.471908	0.83865	-0.0923923	-0.0601777	0.416513	-0.836563	1.17736	-0.130353	-0.113204	-0.0345913	0.885203	0.574914	0.326068			-0.0696255	0.156098	-0.589845	0.131241	-0.184437	-0.222569	-0.725747	-0.279616	0.025553	-0.0700191	-0.0738767	0.415353	0.306786	0.0813714	-0.0337128	0.403355	0.120618	0.260941	0.228898	0.0952797					0.699361	0.0699356	-0.021987	0.0483405	0.33185	0.00219396
-0.104124	0.235251	0.195691	-0.486844	1.16172	-0.452888	0.795496	-0.105241	-0.0382283	0.391389	-0.81272	1.18217	-0.124143	-0.0911981	-0.027055	0.898969	0.417996	0.35746			-0.125698	0.148778	-0.678772	0.142727	-0.193541	-0.239507	-0.731061	-0.320688	-0.102033	-0.0792266	-0.0347543	0.447614	0.320428	0.0767831	-0.048584	0.41358	0.106936	0.255893	0.208478	0.0934615					0.668022	0.0687605	-0.0191635	0.0601271	0.349746	0.00194011
-0.111885	0.243373	0.203985	-0.406619	1.18519	-0.438758	0.753529	-0.108292	-0.0195379	0.371669	-0.775128	1.21343	-0.113654	-0.034296	-0.0264705	0.913046	0.822593	0.379476			-0.0904596	0.145138	-0.65675	0.152347	-0.21311	-0.25621	-0.754885	-0.280197	0.00767035	-0.0872657	-0.0231384	0.468961	0.327081	0.0499906	0.00153089	0.440414	0.0975207	0.253403	0.208124	0.092602					0.671461	0.0685118	-0.0197779	0.0679894	0.365041	0.000448383
-0.106964	0.256388	0.189486	-0.311521	1.20399	-0.425143	0.648202	-0.129282	0.0026139	0.355821	-0.744783	1.25107	-0.104904	0.00064831	-0.0307178	0.881584	0.852756	0.405812			0.00219003	0.143322	-0.637303	0.147471	-0.21811	-0.261694	-0.751288	-0.311518	-0.0477959	-0.0992249	0.0216706	0.449908	0.335534	0.00999669	0.0294226	0.527703	0.111053	0.257221	0.227151	0.0919411					0.664047	0.0697219	-0.0351301	0.078706	0.377158	0.000305196
-0.0488491	0.280198	0.193229	-0.207862	1.22837	-0.404367	0.659484	-0.119171	0.00570757	0.401313	-0.735702	1.22278	-0.0205536	0.0699698	-0.0296091	0.86838	0.806382	0.430226			-0.00217792	0.139506	-0.668386	0.140081	-0.202987	-0.269757	-0.75362	-0.371343	-0.0136595	-0.104563	0.0748844	0.497551	0.33866	-0.0345592	0.0251618	0.514774	0.109461	0.263102	0.248678	0.0923443					0.634063	0.0655323	-0.0356018	0.0830323	0.384277	0.00451227
-0.0573244	0.279486	0.199854	-0.0884567	1.20084	-0.391997	0.743936	-0.115441	0.0402378	0.404539	-0.69371	1.30795	-0.0108142	0.0245596	-0.0268132	0.885807	0.520869	0.45942			0.0345136	0.122875	-0.642257	0.138499	-0.188586	-0.260035	-0.748657	0.0341434	-0.00732473	-0.107325	0.0773027	0.510455	0.331719	-0.0475445	0.0340209	0.498661	0.0942558	0.269965	0.265363	0.0916392					0.557688	0.0651614	-0.0194602	0.0837074	0.390226	0.00596882
-0.0528047	0.276817	0.207453	0.0221352	1.21283	-0.377831	0.727484	-0.125961	0.0503196	0.383839	-0.657572	1.25511	-0.0058239	0.0236131	-0.025838	0.887817	0.292591	0.482207			-0.024383	0.105156	-0.518971	0.148977	-0.161139	-0.250555	-0.74845	0.00797958	0.091009	-0.102367	0.136055	0.562689	0.31537	-0.0102524	0.0418739	0.503248	0.0992163	0.2802	0.265761	0.0915492					0.474424	0.0560038	-0.00116786	0.0753438	0.39197	0.00550574
-0.0488493	0.315403	0.232101	0.110302	1.20523	-0.36857	0.724295	-0.146553	0.0966104	0.377585	-0.608208	1.35941	0.00677983	0.151279	-0.0256224	0.874734	0.309759	0.507008			-0.0955928	0.0792777	-0.372232	0.141655	-0.17546	-0.236096	-0.692232	0.0676785	0.0659551	-0.0989331	0.121216	0.579801	0.30015	-0.00968431	0.0257983	0.494198	0.105613	0.294075	0.24708	0.0914534					0.475973	0.0526743	-0.0047972	0.0564327	0.396672	0.00480875
-0.0494883	0.349182	0.251261	0.177208	1.15898	-0.355721	0.768708	-0.161002	0.112575	0.397274	-0.563867	1.45607	0.0348501	0.0179587	-0.0285856	0.881202	0.303805	0.523731			-0.142373	0.0720794	-0.338189	0.151026	-0.199801	-0.197503	-0.712997	0.0286723	0.236248	-0.0991448	0.1534	0.584425	0.312507	0.0156211	-0.0415781	0.513924	0.106137	0.307326	0.27732	0.0930277					0.400107	0.0478273	0.00436462	0.0538843	0.394626	0.00468391
-0.0612992	0.357073	0.228407	0.186913	1.13497	-0.346214	0.876695	-0.127102	0.109695	0.39647	-0.48412	1.53204	0.0540768	-0.0243535	-0.0329609	0.856665	0.174979	0.532519			-0.119363	0.055263	-0.176526	0.155999	-0.198125	-0.166086	-0.753444	0.021475	0.389473	-0.101884	0.184625	0.570321	0.311669	-0.00115873	-0.0463321	0.503449	0.113245	0.320657	0.319488	0.0931439					0.395172	0.0535308	-0.0120282	0.0438988	0.393488	0.00550536
-0.053867	0.353013	0.191732	0.197668	1.14187	-0.338189	0.963351	-0.0918409	0.131003	0.398392	-0.41574	1.61051	0.0677274	-0.0828567	-0.0325624	0.852123	-0.0579869	0.544722			-0.0578653	0.0432566	-0.14029	0.147044	-0.199072	-0.153272	-0.829414	0.0206032	0.350411	-0.0976374	0.171086	0.577341	0.315704	0.0387618	-0.102632	0.486149	0.1154	0.331361	0.317465	0.0927285					0.294938	0.05434	-0.0169631	0.0456603	0.391283	0.00620818
-0.0588989	0.352467	0.153361	0.200137	1.06979	-0.329555	1.0266	-0.0726055	0.187887	0.415284	-0.360479	1.52999	-0.00228081	-0.123773	-0.0327271	0.869739	-0.150605	0.557495			-0.0738972	0.0286419	-0.0482344	0.157737	-0.196687	-0.141805	-0.865375	-0.0431204	0.374663	-0.0995816	0.189601	0.558233	0.308408	0.0343271	-0.150848	0.413356	0.114361	0.335732	0.294599	0.095642					0.304027	0.0574913	-0.00389942	0.0445737	0.380935	0.00675631
-0.12022	0.341196	0.124179	0.196077	1.00996	-0.331257	1.0393	-0.0516113	0.251781	0.415472	-0.275616	1.56372	-0.00300903	-0.134942	-0.0311264	0.844124	-0.126619	0.580982			-0.0893462	0.0191575	0.12095	0.151202	-0.193049	-0.141166	-0.809959	-0.0507062	0.617817	-0.0864899	0.200134	0.468071	0.315039	0.0395599	-0.101429	0.399369	0.126284	0.340987	0.269266	0.0976151					0.279465	0.0629042	-0.00601028	0.0525926	0.376245	0.00333815
-0.108778	0.337739	0.0876564	0.178242	1.06753	-0.31897	0.976081	-0.0365304	0.280995	0.425338	-0.229199	1.48209	-0.00979896	-0.232475	-0.0356075	0.830037	-0.111618	0.604771			-0.127718	0.0351131	0.203452	0.156165	-0.200081	-0.141649	-0.788466	-0.230344	0.404294	-0.0837883	0.197162	0.450845	0.331131	0.00472533	-0.0783377	0.407197	0.145153	0.34731	0.267691	0.097268					0.263341	0.0488282	-0.042893	0.0569587	0.370505	0.00243453
-0.112332	0.277114	0.0909387	0.16727	1.08166	-0.312756	0.954337	-0.0501227	0.311623	0.439101	-0.162642	1.48078	-0.00579378	-0.226592	-0.0365201	0.845066	-0.0262989	0.626554			-0.0535034	0.050793	0.201637	0.160529	-0.220878	-0.150711	-0.828232	-0.280964	0.417573	-0.0811063	0.138095	0.399457	0.343475	-0.0424027	-0.0485229	0.35685	0.140875	0.351333	0.266225	0.101266					0.264141	0.0584585	-0.0720193	0.0594169	0.364924	0.00125558
-0.103978	0.275366	0.0833768	0.153462	0.983925	-0.303327	0.898096	-0.0157635	0.345868	0.450995	-0.126289	1.4092	-0.0143951	-0.342913	-0.0414555	0.812764	-0.0104703	0.641196			-0.0430068	0.0526181	0.00633359	0.169926	-0.215201	-0.158105	-0.836966	-0.165594	0.439995	-0.0805258	0.127744	0.365806	0.360177	-0.0598346	-0.0308465	0.346631	0.140415	0.354997	0.281857	0.102908					0.261053	0.0530447	-0.0804606	0.0871797	0.359612	0.00152204
-0.104077	0.275014	0.0935689	0.136924	0.959417	-0.301876	0.851197	-0.0197179	0.355595	0.4496	-0.0863006	1.30705	-0.105825	-0.207142	-0.0411498	0.802458	0.0791529	0.642875			0.0107581	0.0225553	-0.128371	0.16508	-0.205354	-0.192642	-0.77416	-0.142985	0.567115	-0.0863107	0.0798738	0.35114	0.348164	-0.0261578	-0.00575945	0.331569	0.139302	0.359373	0.251874	0.102606					0.227085	0.0531289	-0.082059	0.0810172	0.355276	0.00145606
-0.103511	0.287299	0.0907159	0.123612	0.92257	-0.295625	0.818639	-0.0304395	0.408741	0.460884	-0.0849905	1.19408	-0.104241	-0.18474	-0.0420466	0.840004	-0.0431623	0.646886			-0.0349184	0.0440469	-0.0953241	0.163382	-0.206035	-0.210126	-0.714876	-0.212189	0.454155	-0.0830366	0.0190312	0.318301	0.341917	-0.0183094	0.0964579	0.315703	0.133691	0.35945	0.22538	0.105882					0.252112	0.0339257	-0.0623609	0.0832027	0.34481	-0.000793592
-0.102416	0.291705	0.10977	0.110898	0.886204	-0.286479	0.821788	-0.0354663	0.411057	0.472994	-0.0635042	1.09028	-0.109414	-0.331815	-0.0399796	0.846807	-0.301712	0.645028			-0.0572019	0.0474678	-0.0282774	0.177797	-0.198059	-0.196431	-0.639956	-0.249014	0.225562	-0.0806896	0.0433021	0.256157	0.347649	-0.0326253	0.116495	0.293702	0.137574	0.360608	0.243843	0.109265					0.241549	0.0132172	-0.0555593	0.0828967	0.336746	-0.00156729
-0.0974909	0.253948	0.152486	0.100926	0.939235	-0.282439	0.917156	-0.0391562	0.404784	0.477799	-0.0479939	1.06653	-0.112175	-0.183759	-0.038187	0.851631	-0.304706	0.643214			-0.0970093	0.0584969	-0.0848947	0.170331	-0.184539	-0.20418	-0.613288	-0.103659	-2.11429e-05	-0.0811576	0.0526192	0.219684	0.36168	-0.0177769	0.134985	0.27723	0.129915	0.345191	0.262919	0.109743					0.202144	0.00791686	-0.0528448	0.0893766	0.334592	-0.00230383
-0.0904987	0.213363	0.17474	0.100081	0.997892	-0.272355	0.946776	-0.0471244	0.385322	0.501046	-0.0450195	1.00395	-0.111181	-0.324692	-0.0352884	0.870495	-0.269235	0.626401			-0.100269	0.0750688	-0.0946094	0.182451	-0.19884	-0.211898	-0.690304	-0.0830902	-0.243621	-0.0832647	0.0703247	0.23961	0.354797	-0.020813	0.101407	0.256869	0.117976	0.353275	0.262223	0.106386					0.179629	-0.00407183	-0.0306315	0.0840701	0.32864	-0.00324366
-0.103018	0.179607	0.191768	0.0968641	1.03521	-0.263813	0.964589	-0.0321436	0.401145	0.506836	-0.0110863	0.957424	-0.0997293	-0.137181	-0.0294472	0.873396	-0.302041	0.593413			-0.126152	0.0636272	-0.0727957	0.179819	-0.198464	-0.228372	-0.686907	-0.0398694	-0.241525	-0.0928058	0.145605	0.242783	0.342329	-0.0125665	0.0908403	0.245408	0.104048	0.333603	0.261941	0.109903					0.188035	-0.0087698	-0.0223507	0.0719598	0.325778	-0.00337599
-0.0967865	0.192667	0.18185	0.0986591	1.03982	-0.258542	0.949596	-0.00293028	0.409826	0.512771	-0.012059	0.896067	-0.0895029	-0.0766858	-0.0261843	0.876483	-0.287569	0.562409			-0.169973	0.0466207	-0.144415	0.168937	-0.195376	-0.240959	-0.688265	-0.0525918	-0.20048	-0.0963918	0.144291	0.215654	0.355652	-0.00936787	0.0803587	0.236005	0.0995547	0.341689	0.261156	0.108212					0.182744	-0.0361415	-0.0347181	0.0729012	0.323902	-0.00347814
-0.105235	0.157546	0.179036	0.11468	1.05666	-0.25334	0.973066	-0.0091676	0.388957	0.522541	-0.00181269	0.829304	0.00517398	-0.0742406	-0.0204396	0.919163	-0.310364	0.540176			-0.193389	0.0616103	-0.0177102	0.160507	-0.193301	-0.228112	-0.707181	-0.102916	-0.397313	-0.0983473	0.158907	0.181783	0.351834	0.00175386	0.0748755	0.21323	0.0916908	0.343455	0.261995	0.108806					0.140385	-0.0449093	-0.0145163	0.0630853	0.316892	-0.00357502
-0.101789	0.130433	0.169334	0.128864	1.08969	-0.248036	0.947069	0.0219986	0.399116	0.515438	0.0120934	0.78437	0.0137929	-0.0618015	-0.0180291	0.930576	-0.286891	0.527431			-0.222455	0.0732634	-0.1208	0.194965	-0.208975	-0.212689	-0.733823	-0.131957	-0.443814	-0.0834861	0.15226	0.125869	0.372797	-0.008106	0.0776789	0.214508	0.0913096	0.348136	0.259461	0.107587					0.181044	-0.0497923	-0.00470904	0.0569642	0.30799	-0.00297332
-0.108655	0.101332	0.167746	0.128311	1.09466	-0.24359	0.903019	0.0438494	0.351379	0.500416	0.0309772	0.73302	-0.0629679	-0.00246123	-0.00989947	0.926021	-0.119592	0.518036			-0.165994	0.0830303	-0.122716	0.211004	-0.22888	-0.203815	-0.738163	-0.0335141	-0.466208	-0.0732668	0.171409	0.10252	0.356336	-0.0277867	0.0096396	0.21969	0.0934547	0.355983	0.25835	0.10691					0.144601	-0.0468616	-0.0278923	0.0498643	0.305738	-0.00163064
-0.0914966	0.0810275	0.155243	0.132586	1.07724	-0.238247	0.807812	0.0638905	0.333456	0.510692	0.0520897	0.666233	0.0182994	0.170136	-0.00788011	0.893559	-0.0539775	0.509387			-0.225223	0.101046	-0.193629	0.202422	-0.228336	-0.21284	-0.795662	0.0691468	-0.472359	-0.0742253	0.155908	0.117845	0.343538	-0.0324203	0.00238221	0.193683	0.0983289	0.362649	0.255451	0.103405					0.160691	-0.0356697	-0.0399571	0.0435032	0.306484	-0.00245743
-0.0863795	0.0952831	0.159395	0.151351	1.05884	-0.228492	0.73617	0.0871198	0.323559	0.503319	0.0894539	0.591912	0.103824	0.140303	-0.00174523	0.87364	-0.0299883	0.498262			-0.264818	0.0950404	-0.073775	0.207096	-0.242198	-0.201991	-0.841093	0.060246	-0.14887	-0.061085	0.135849	0.12384	0.339484	-0.0209447	-0.0348885	0.190783	0.0939681	0.388293	0.252324	0.100997					0.159026	-0.0494888	-0.0437121	0.0336121	0.303579	-0.000550354
-0.0808314	0.117785	0.149034	0.157582	1.02961	-0.224105	0.662127	0.0872005	0.314559	0.458503	0.116469	0.516134	0.115798	0.220659	-0.00336687	0.887896	-0.126086	0.501313			-0.326609	0.0672595	-0.0392021	0.215696	-0.231977	-0.165492	-0.803189	0.0601529	-0.148284	-0.0704041	0.125721	0.0892229	0.332613	-0.0148388	-0.0115707	0.20252	0.104557	0.393737	0.252093	0.103592					0.258962	-0.0522414	-0.0511113	0.0314234	0.301001	0.000781666
-0.0790193	0.135547	0.154953	0.161656	0.975938	-0.224177	0.591745	0.0687677	0.278771	0.424875	0.0908979	0.478646	0.111218	0.0610058	-0.00455678	0.887398	-0.0773073	0.508501			-0.347455	0.0702119	-0.0733887	0.216967	-0.245771	-0.154264	-0.845517	0.0382628	0.148231	-0.0652306	0.0472452	0.0545066	0.339958	0.0266587	0.00435372	0.185859	0.113225	0.425219	0.249423	0.102281					0.239898	-0.0444386	-0.0438569	0.0313229	0.296821	0.000847043
-0.0804282	0.145593	0.152766	0.174529	0.864008	-0.220799	0.509567	0.0552986	0.229167	0.42232	0.0780603	0.475528	0.100402	0.150009	-0.00289622	0.826082	-0.101603	0.507784			-0.402272	0.0992399	0.0595312	0.220421	-0.244443	-0.152683	-0.787152	0.0548357	-0.141448	-0.0629441	0.0567109	0.0362596	0.316385	0.0096072	-0.000838714	0.189437	0.103869	0.430025	0.267795	0.101295					0.251478	-0.0487746	-0.0217045	0.0319364	0.29151	0.00118888
-0.0788516	0.156729	0.156006	0.187469	0.872604	-0.220498	0.392907	0.0410118	0.206967	0.414588	0.10012	0.444103	0.00956108	0.324416	-0.00581544	0.76609	-0.120062	0.512079			-0.376594	0.106312	0.0916623	0.234333	-0.253672	-0.150931	-0.749678	0.0610724	-0.140269	-0.0641629	0.0633819	0.0516067	0.322375	-0.0245492	-0.0102986	0.196335	0.10659	0.4364	0.264598	0.0978882					0.281711	-0.044898	-0.0266025	0.034549	0.292719	0.00238885
-0.0729406	0.166185	0.16145	0.185086	0.896743	-0.224238	0.313488	0.0306279	0.156563	0.408207	0.0911998	0.417686	0.010302	0.154413	-0.00678141	0.72367	-0.197166	0.512839			-0.315274	0.105792	0.389594	0.219838	-0.257947	-0.145452	-0.734727	0.126388	-0.341753	-0.0700279	0.0788723	0.0972871	0.297519	-0.0525617	0.0130803	0.154924	0.0987721	0.441241	0.261415	0.09996					0.271564	-0.051816	-0.0231658	0.0470746	0.295953	0.00273432
-0.0649988	0.175207	0.169765	0.199372	0.930962	-0.241731	0.25296	0.0246179	0.177431	0.421266	0.0813012	0.435262	0.00148395	0.124341	-0.0126842	0.647501	-0.319355	0.514822			-0.29266	0.0981774	0.407043	0.2146	-0.258492	-0.139816	-0.748504	0.0476563	-0.138662	-0.0865662	0.0701732	0.10609	0.311887	-0.0249422	-0.000564283	0.124569	0.100654	0.448153	0.258726	0.0997839					0.263206	-0.0538446	-0.00955245	0.0654904	0.294694	0.00124617
-0.0817248	0.190216	0.18361	0.191946	0.957872	-0.269908	0.207195	0.0128687	0.168781	0.425261	0.0812397	0.432008	0.00129261	-0.00921549	-0.0163296	0.611886	-0.26125	0.51773			-0.247616	0.0812771	0.456295	0.224538	-0.275285	-0.117027	-0.726859	0.0570842	0.0675643	-0.0746109	0.0868709	0.113832	0.317513	-0.0314324	0.0218032	0.127099	0.0896797	0.45371	0.25702	0.100064					0.228383	-0.0568572	-0.00810303	0.0714776	0.291186	0.00253825
-0.0858715	0.200041	0.175677	0.180873	0.884063	-0.301838	0.147386	-0.00560381	0.16357	0.425551	0.0771585	0.45705	-0.0783733	-0.244669	-0.0242483	0.577276	-0.244421	0.514677			-0.230737	0.0774715	0.260433	0.211099	-0.259276	-0.105059	-0.599451	0.153135	-0.0201285	-0.0849425	0.0972565	0.0873672	0.305609	-0.0668239	0.0368307	0.107557	0.0956556	0.462201	0.277614	0.101619					0.209937	-0.0475238	-0.000694035	0.0810953	0.282725	0.00131284
-0.0911347	0.211381	0.177478	0.188008	0.801698	-0.337098	0.141486	0.00501557	0.1266	0.439252	0.0686533	0.468179	-0.0867812	-0.16157	-0.0240826	0.52392	-0.000549715	0.498745			-0.206988	0.0987983	0.261696	0.209395	-0.271421	-0.114133	-0.555605	0.0863991	-0.0176557	-0.078592	0.184707	0.092028	0.329006	-0.0689351	0.036317	0.0787658	0.0861732	0.463831	0.274129	0.0962745					0.145562	-0.0341039	-0.0167634	0.0981095	0.280176	-0.00018329
-0.0797385	0.19985	0.1773	0.195873	0.752726	-0.377126	0.175303	0.0154641	0.127782	0.4558	0.12103	0.480233	-0.0893874	-0.19115	0.0118288	0.469178	-0.0576821	0.484605			-0.202683	0.112969	0.356448	0.218591	-0.257696	-0.100432	-0.491854	0.0594404	-0.0550998	-0.0817077	0.194923	0.100963	0.337547	-0.101855	0.0426249	0.082969	0.0623782	0.467788	0.272486	0.0950631					0.165103	-0.0277011	-0.0147529	0.110171	0.276891	0.000813794
-0.079119	0.211615	0.148419	0.193811	0.774685	-0.417624	0.298034	0.0224414	0.142554	0.450067	0.176812	0.429567	-0.153257	-0.172064	0.0100441	0.443553	-0.0834297	0.478887			-0.159733	0.0930028	0.299828	0.226092	-0.253542	-0.0763336	-0.566426	0.0774734	-0.0531856	-0.0868125	0.269246	0.142434	0.350488	-0.0513219	0.0243986	0.0742497	0.0766074	0.47722	0.27115	0.0968679					0.150569	-0.000698459	-0.0309564	0.110395	0.277167	-1.74356e-05
-0.0714228	0.224013	0.124779	0.17611	0.777849	-0.397836	0.321267	0.0270034	0.134803	0.444042	0.213588	0.487754	-0.138971	-0.345909	0.0133096	0.42982	0.121045	0.466847			-0.0781635	0.0813194	0.36541	0.211864	-0.252561	-0.0572822	-0.664848	0.112928	0.202743	-0.084549	0.355593	0.162004	0.33741	-0.00444368	0.0459822	0.0672416	0.0689175	0.489576	0.26928	0.099502					0.138619	0.0112226	-0.0418859	0.112337	0.271978	-0.0014728
-0.0725903	0.185236	0.140121	0.178772	0.757336	-0.385455	0.354942	0.0207629	0.165224	0.463271	0.250639	0.516859	-0.15183	-0.223377	0.0145251	0.411477	0.127642	0.467514			-0.158683	0.0731468	0.173507	0.19943	-0.218701	-0.0461467	-0.725825	0.0794533	0.159273	-0.0908072	0.469407	0.143982	0.349368	0.0284985	0.00513593	0.0717275	0.0809147	0.495426	0.268513	0.100023					0.16922	0.0323271	-0.0401861	0.123099	0.26984	-0.00191454
-0.0747334	0.207114	0.167223	0.176713	0.61732	-0.359064	0.368341	0.0105117	0.144073	0.45486	0.313237	0.538712	-0.0749003	-0.125115	0.0142874	0.391186	0.0700449	0.466811			-0.141006	0.0862731	0.267989	0.188063	-0.196936	-0.0356715	-0.769789	0.0781696	0.173433	-0.0745352	0.493461	0.112837	0.359795	0.120275	0.00479327	0.0864573	0.0845033	0.503012	0.267249	0.0970194					0.218502	0.0494511	-0.0449754	0.127081	0.266343	-0.00102156
-0.0766806	0.175794	0.165021	0.194054	0.494917	-0.327685	0.455261	0.00158875	0.155156	0.43722	0.31049	0.575169	-0.0818349	-0.0345686	0.0174808	0.385672	-0.0222935	0.46615			-0.18233	0.092491	0.142029	0.181277	-0.180148	-0.0305237	-0.716803	0.043435	0.212752	-0.0803845	0.529285	0.0824706	0.366481	0.180521	0.0194031	0.0932242	0.0896335	0.511808	0.288146	0.0975973					0.221675	0.0688419	-0.0505036	0.131576	0.266499	-0.0012948
-0.0952893	0.151473	0.178433	0.20566	0.466598	-0.295089	0.504287	-0.00816256	0.14321	0.381229	0.349318	0.60057	-0.00557002	0.00405602	0.0186971	0.377577	-0.0322901	0.459224			-0.127234	0.128652	0.230386	0.172967	-0.170689	-0.0395101	-0.839065	-0.191815	0.237415	-0.0870864	0.611219	0.0918168	0.378441	0.274584	0.0658871	0.103339	0.0931894	0.517027	0.28709	0.0956268					0.259541	0.0827896	-0.0813177	0.127402	0.269509	-0.000908914
-0.111752	0.125081	0.205981	0.208575	0.463679	-0.259418	0.585146	-0.0202789	0.169463	0.382345	0.345323	0.635193	-0.0774111	-0.170472	0.0204128	0.361923	-0.207434	0.462218			-0.143212	0.126356	0.0830805	0.165077	-0.160382	-0.0478886	-0.889161	-0.205017	0.489811	-0.0943233	0.559286	0.0855575	0.355986	0.362548	0.0336111	0.110613	0.0894592	0.533609	0.308758	0.0983519					0.242267	0.107801	-0.0745658	0.121284	0.266421	-0.000255615
-0.116203	0.126025	0.223444	0.205937	0.443396	-0.218665	0.535712	-0.0291693	0.153855	0.404683	0.351342	0.661349	-0.0827508	-0.113155	-0.0156178	0.356409	-0.0113606	0.467755			-0.136718	0.108793	0.00855752	0.129135	-0.15983	-0.0594514	-0.905179	-0.146547	0.48814	-0.08335	0.580713	0.0802334	0.35714	0.469838	0.0249182	0.115679	0.113238	0.542652	0.304935	0.0978666					0.275166	0.127298	-0.0966829	0.121107	0.26395	-0.000780964
-0.130526	0.114552	0.273023	0.170793	0.42125	-0.18089	0.511308	-0.0361372	0.170718	0.387285	0.365357	0.671253	-0.0837645	-0.0935671	-0.0132919	0.339429	0.245672	0.471057			-0.219994	0.117182	-0.0134954	0.113858	-0.165568	-0.0595218	-0.791884	-0.0567163	0.680473	-0.0798387	0.508105	0.0834896	0.351753	0.50971	0.00708895	0.103318	0.105368	0.548985	0.304207	0.0961336					0.304991	0.144841	-0.0746399	0.129736	0.25934	-0.000399103
-0.135001	0.105518	0.311605	0.117882	0.405169	-0.200726	0.577243	-0.0237054	0.187504	0.361505	0.332686	0.64654	-0.0179672	0.0622892	0.0210751	0.33079	0.248808	0.481718			-0.239161	0.126825	-0.0411948	0.118205	-0.164977	-0.0752373	-0.727568	-0.137775	0.637515	-0.0852952	0.445311	0.0575419	0.351399	0.531166	0.0339269	0.12404	0.114104	0.527415	0.301127	0.0918823					0.32306	0.160517	-0.0612186	0.124797	0.256239	-0.000701713
-0.136532	0.136478	0.309445	0.0630356	0.371501	-0.211821	0.641644	-0.00576755	0.166287	0.335725	0.364517	0.622635	0.000341305	0.137497	0.0240253	0.322458	0.26371	0.484046			-0.235578	0.142477	0.247986	0.107792	-0.188441	-0.0788655	-0.648338	-0.100821	0.926509	-0.0686848	0.330617	0.0474864	0.341921	0.502489	0.0357981	0.122548	0.104531	0.510587	0.319367	0.0896195					0.264724	0.189399	-0.0824767	0.112881	0.251171	0.00236297
-0.134759	0.109481	0.275061	0.0265301	0.457732	-0.218969	0.677903	0.0179819	0.194469	0.331993	0.355911	0.54434	-0.058112	-0.0914357	0.0278819	0.319791	0.381895	0.474539			-0.317814	0.165194	0.198873	0.122315	-0.205316	-0.0844992	-0.60297	-0.0582467	0.685597	-0.0681331	0.314603	0.0790839	0.327852	0.420088	0.0571539	0.105956	0.105985	0.511683	0.340834	0.0911182					0.222459	0.2173	-0.089576	0.101042	0.250453	0.0049173
-0.129957	0.120544	0.264768	0.0237995	0.537374	-0.223755	0.672989	0.0424896	0.242526	0.341872	0.365401	0.457394	-0.119054	-0.240219	0.0262146	0.310025	0.407127	0.478232			-0.346063	0.162556	0.47539	0.128826	-0.192796	-0.0813254	-0.627072	-0.109652	0.420948	-0.0641044	0.278634	0.107064	0.32616	0.392351	0.155486	0.116352	0.106403	0.518849	0.316088	0.0877368					0.248212	0.233742	-0.0825982	0.0918892	0.249282	0.00419261
-0.12278	0.170294	0.233634	0.0159126	0.601796	-0.222542	0.708247	0.0425271	0.253292	0.421618	0.339981	0.385106	-0.112918	-0.0867719	0.0264053	0.312586	0.434019	0.498714			-0.418588	0.139496	0.574643	0.134658	-0.213816	-0.0689871	-0.566999	0.0718747	0.209696	-0.0552	0.198016	0.133236	0.322477	0.34652	0.15254	0.109592	0.113983	0.500663	0.291606	0.0845492					0.253832	0.255939	-0.0893547	0.0805915	0.249078	0.00405128
-0.117915	0.180935	0.173052	0.00628723	0.556497	-0.217368	0.594104	0.0626613	0.259291	0.437307	0.357369	0.321845	-0.0280751	0.0988216	0.0205134	0.305389	0.668828	0.509489			-0.429561	0.13721	0.800298	0.123914	-0.209384	-0.0580456	-0.536042	0.0653651	-0.0503158	-0.0448891	0.166008	0.140182	0.334807	0.30748	0.207916	0.100798	0.128637	0.498717	0.286719	0.0814148					0.258549	0.266856	-0.0968524	0.0693643	0.249372	0.00451072
-0.133225	0.174143	0.172359	0.026658	0.589123	-0.217684	0.665672	0.0781791	0.288938	0.417393	0.33543	0.245095	-0.0125822	0.223219	0.0144832	0.303945	0.789563	0.516557			-0.420762	0.152999	0.88503	0.130929	-0.198536	-0.0426212	-0.46998	0.12626	-0.0321261	-0.0449422	0.159926	0.123639	0.325791	0.256001	0.227693	0.0731903	0.115816	0.501531	0.311945	0.0810228					0.24346	0.288786	-0.0972848	0.0657709	0.249572	0.00414486
-0.116337	0.176668	0.164262	0.0835215	0.604311	-0.204633	0.632233	0.0970175	0.298763	0.415086	0.323496	0.233074	0.0596016	0.240413	0.0109229	0.303882	0.558017	0.522231			-0.391683	0.14162	0.924342	0.133719	-0.202449	-0.0340172	-0.539971	0.0971276	-0.201872	-0.0307941	0.231454	0.113307	0.320585	0.183521	0.260565	0.0969215	0.119341	0.477531	0.286902	0.0788261					0.234807	0.294193	-0.114286	0.0538523	0.25049	0.00703259
-0.125472	0.178473	0.157135	0.166213	0.597452	-0.19549	0.643618	0.0708397	0.335029	0.409828	0.335569	0.18788	0.050471	0.284343	-0.0292696	0.308545	0.488571	0.519262			-0.484207	0.153494	1.00868	0.131736	-0.209149	-0.0329804	-0.527083	0.134358	-0.404972	-0.0214868	0.254215	0.122433	0.330013	0.13309	0.251338	0.0684623	0.111525	0.5024	0.286268	0.0823974					0.257579	0.308897	-0.135367	0.049873	0.251003	0.00824923
-0.140195	0.191764	0.14551	0.228027	0.594895	-0.172363	0.623369	0.0558207	0.388046	0.406999	0.323693	0.162936	0.1272	0.288444	-0.0174272	0.299883	0.498133	0.518435			-0.505214	0.148897	0.955797	0.138114	-0.209293	-0.0279827	-0.582702	0.0744938	-0.666813	-0.0302592	0.263469	0.13844	0.329839	0.128114	0.284046	0.0812896	0.121145	0.524875	0.263152	0.0871385					0.296044	0.314287	-0.134165	0.0445944	0.248623	0.0056584
-0.150443	0.197998	0.147253	0.274893	0.502983	-0.140104	0.560552	0.0568457	0.380538	0.406191	0.31126	0.195736	0.200132	0.314067	-0.00390507	0.301368	0.424536	0.528857			-0.53879	0.119823	0.914141	0.127746	-0.20036	-0.0164356	-0.559032	0.083883	-0.65447	-0.039212	0.262802	0.143268	0.336741	0.125587	0.254042	0.0966633	0.119413	0.526624	0.236544	0.0856249					0.31984	0.317058	-0.140451	0.0548427	0.248614	0.00313864
-0.163507	0.209016	0.1509	0.280313	0.411614	-0.0935493	0.529598	0.0271266	0.351205	0.39986	0.301736	0.230542	0.277103	0.561207	-0.00286557	0.287194	0.482141	0.527152			-0.513808	0.122113	0.783888	0.127237	-0.214548	-0.0100334	-0.552752	0.110438	-0.66092	-0.0416852	0.266626	0.128615	0.317567	0.144994	0.134189	0.101739	0.109977	0.520868	0.235372	0.0869195					0.342142	0.330379	-0.156524	0.0494115	0.246551	0.00359078
-0.166609	0.184756	0.160888	0.288249	0.314945	-0.0471628	0.496644	0.0272899	0.336814	0.368238	0.282251	0.239	0.286478	0.598593	0.0168647	0.28389	0.494534	0.533975			-0.416036	0.12732	0.761755	0.129829	-0.199357	0.0106194	-0.505107	-0.0425215	-0.682581	-0.0377361	0.334391	0.0818257	0.304957	0.140987	0.115403	0.111189	0.115904	0.541952	0.232111	0.0886354					0.28378	0.338401	-0.144877	0.0490649	0.243237	0.00266743
-0.146288	0.14721	0.225343	0.295856	0.405266	0.000439194	0.54154	0.0147153	0.337725	0.352961	0.296335	0.224114	0.273347	0.535123	0.0368241	0.288844	0.30242	0.540544			-0.374113	0.119363	0.74227	0.141843	-0.182261	0.0254939	-0.438603	0.138968	-0.675311	-0.0318306	0.339419	0.0788968	0.303489	0.108644	0.106567	0.125911	0.104484	0.5378	0.20889	0.0928118					0.307339	0.339802	-0.156086	0.035167	0.24244	0.00193457
-0.130041	0.173238	0.190435	0.2918	0.317806	0.0699771	0.500125	-0.00563433	0.341413	0.358148	0.306092	0.239036	0.275889	0.455741	0.0614338	0.276389	0.140013	0.547661			-0.343474	0.125127	0.83657	0.150628	-0.196384	0.039044	-0.44131	0.0653274	-0.903086	-0.029243	0.354192	0.103714	0.292074	0.0538528	0.116096	0.157775	0.122137	0.534765	0.181079	0.0931282					0.294366	0.347749	-0.152938	0.0305932	0.241115	0.0022892
-0.126744	0.186682	0.14661	0.275701	0.242141	0.135413	0.498349	-0.0272684	0.347177	0.369592	0.29475	0.26679	0.302858	0.457468	0.0819305	0.276816	0.2258	0.564463			-0.324387	0.142116	0.973062	0.141897	-0.17902	0.0379275	-0.382077	0.104575	-0.899862	-0.0393889	0.290302	0.0981529	0.285803	0.056151	0.136308	0.153442	0.123513	0.532522	0.22463	0.0963233					0.237285	0.371742	-0.152693	0.0354805	0.240051	-0.000805155
-0.114493	0.150063	0.158732	0.262193	0.162785	0.186043	0.458558	-0.0272763	0.303665	0.382964	0.302147	0.282504	0.33417	0.492454	0.0968464	0.255987	0.232016	0.5829			-0.296908	0.125016	0.962333	0.137117	-0.17974	0.0563976	-0.343972	0.00857099	-0.980352	-0.0441509	0.253559	0.111593	0.278483	0.0762334	0.130161	0.158499	0.1183	0.533498	0.242752	0.0956997					0.215645	0.378632	-0.15368	0.0344764	0.239699	-0.00166263
-0.101116	0.154153	0.192098	0.260058	0.0906598	0.231757	0.436024	-0.0337473	0.286422	0.381122	0.334278	0.305068	0.348995	0.507172	0.100628	0.259882	0.293772	0.619574			-0.262548	0.12101	0.935016	0.131079	-0.179116	0.0664624	-0.280378	-0.00984161	-0.957046	-0.0439678	0.252043	0.0826573	0.28762	0.100306	0.116108	0.145568	0.128115	0.534702	0.262258	0.0875252					0.201496	0.390602	-0.157087	0.0321446	0.2386	-0.00201587
-0.0925635	0.120685	0.209809	0.256918	0.0974867	0.264439	0.516876	-0.0594131	0.269243	0.381039	0.32891	0.311388	0.362342	0.636319	0.103716	0.254664	0.618897	0.656254			-0.23138	0.132143	0.967635	0.133512	-0.175375	0.0798219	-0.277838	-0.0284705	-0.926661	-0.0398778	0.255244	0.0429047	0.271811	0.0900807	0.160353	0.130488	0.122118	0.515961	0.281779	0.0875719					0.15941	0.40221	-0.164331	0.0243999	0.234073	-0.00247821
-0.0846636	0.098966	0.231314	0.257934	0.0960356	0.278538	0.442581	-0.0586	0.289814	0.358759	0.368623	0.331342	0.371234	0.640887	0.121725	0.257948	1.0072	0.70003			-0.259986	0.118878	1.09342	0.110123	-0.176284	0.0947576	-0.22415	-0.131742	-0.860788	-0.0392744	0.25794	0.0347909	0.27134	0.0756991	0.182929	0.125926	0.129346	0.490685	0.298132	0.089795					0.120792	0.403138	-0.174012	0.0356105	0.231143	-0.0030879
-0.0674793	0.070038	0.23958	0.261501	0.104076	0.292812	0.381178	-0.0586458	0.312986	0.367217	0.393825	0.348984	0.384254	0.663941	0.125	0.249375	0.99428	0.740178			-0.394596	0.118654	0.911715	0.122176	-0.175772	0.109805	-0.147578	0.0512455	-0.861785	-0.04182	0.189179	0.0632049	0.29159	0.0677167	0.238699	0.099671	0.121631	0.493049	0.317133	0.0939545					0.11599	0.417979	-0.175624	0.0462505	0.231797	-0.00255727
-0.070574	0.0979717	0.219631	0.262255	0.0515306	0.305754	0.33675	-0.0666613	0.337911	0.35409	0.396558	0.387681	0.398665	0.705454	0.127227	0.24444	0.934907	0.776648			-0.422714	0.134949	0.774695	0.105495	-0.189863	0.124794	-0.19663	-0.0866168	-0.548507	-0.0439767	0.253945	0.0523091	0.287917	0.0731449	0.200553	0.106501	0.116244	0.46578	0.334599	0.0894901					0.0729855	0.431258	-0.172791	0.0542081	0.229413	-0.00273172
-0.0737074	0.0731274	0.245529	0.250268	0.0927613	0.301528	0.29865	-0.0670645	0.339098	0.315599	0.387741	0.398952	0.407015	0.657951	0.111524	0.253295	1.18824	0.820309			-0.438223	0.141899	0.593423	0.107096	-0.183564	0.147699	-0.136455	-0.13108	-0.533162	-0.0370397	0.259277	0.00519235	0.304188	0.115324	0.1468	0.102718	0.0893448	0.442578	0.351612	0.083901					0.0373298	0.430921	-0.161641	0.0614222	0.227105	-0.0026591
-0.0740038	0.0470743	0.281051	0.249789	0.122622	0.311053	0.207254	-0.0680355	0.342832	0.265394	0.391586	0.388069	0.402743	0.512261	0.0958357	0.252875	1.10296	0.856066			-0.475244	0.12687	0.328389	0.111112	-0.189685	0.17112	-0.0231518	-0.216556	-0.483219	-0.039827	0.273446	-0.037801	0.318778	0.119159	0.14785	0.0842476	0.0886988	0.444553	0.323179	0.0760582					0.0710558	0.426966	-0.167728	0.0538085	0.225941	-0.00240696
-0.0774838	0.063447	0.283744	0.253166	0.183639	0.256477	0.135872	-0.0619724	0.384328	0.219331	0.374974	0.392134	0.398024	0.49897	0.0841225	0.260849	0.991078	0.89821			-0.447987	0.145265	0.231734	0.112606	-0.188624	0.19656	0.0397981	-0.183266	-0.330953	-0.0283113	0.354541	-0.108231	0.317534	0.128391	0.142236	0.0862832	0.105932	0.443746	0.320223	0.0736076					0.0375635	0.433801	-0.1709	0.0612451	0.220114	-0.000474387
-0.0771836	0.0516061	0.246268	0.292367	0.239125	0.200785	0.102895	-0.0597469	0.442777	0.165865	0.329968	0.395984	0.403289	0.48685	0.0641051	0.257597	0.907701	0.921826			-0.387539	0.157639	0.219808	0.120351	-0.172681	0.230711	0.0979644	-0.0784713	-0.268857	-0.0267874	0.365652	-0.121677	0.318514	0.129575	0.136804	0.121034	0.0960904	0.449513	0.34142	0.0713575					0.0194307	0.434579	-0.174237	0.0584643	0.220148	-0.000648428
-0.0734224	0.0786148	0.219931	0.346655	0.265748	0.144611	0.0466446	-0.0502319	0.543651	0.0938921	0.345848	0.386559	0.394962	0.558897	0.0439455	0.254181	0.616871	0.925281			-0.376557	0.138271	0.242415	0.109994	-0.174103	0.234594	0.171375	-0.0138518	-0.230132	-0.0197877	0.366983	-0.12575	0.336044	0.113126	0.111611	0.115362	0.0920076	0.446901	0.3381	0.0722332					0.00636378	0.438863	-0.173126	0.0634327	0.219998	0.000762685
-0.0628995	0.0960087	0.194026	0.398702	0.298225	0.0964234	0.0709663	-0.0500098	0.574638	0.0401179	0.337225	0.381569	0.380337	0.574066	0.0244736	0.250799	0.173256	0.920057			-0.367203	0.145305	0.0507988	0.116261	-0.183157	0.222981	0.201057	-0.0100805	-0.210236	-0.0179689	0.439855	-0.137182	0.330599	0.0788826	0.125465	0.130065	0.0976424	0.484187	0.361661	0.064632					0.00564963	0.457122	-0.156942	0.0562922	0.218239	0.00189112
-0.0611494	0.11631	0.152359	0.465793	0.363457	0.0454178	0.0996887	-0.0371067	0.600645	-0.0260408	0.345712	0.38514	0.371771	0.570359	0.00512121	0.250541	0.506291	0.906177			-0.323247	0.135459	0.0502337	0.104555	-0.202752	0.233227	0.666507	-0.120231	-0.16908	-0.0166296	0.427902	-0.163846	0.326698	0.0929968	0.0872314	0.14915	0.0803822	0.466769	0.356846	0.0631999					0.0235512	0.450747	-0.163086	0.0498036	0.216408	0.0068972
-0.0590644	0.131008	0.12653	0.522439	0.399699	-0.00701697	0.114768	-0.0251589	0.663806	-0.0807304	0.358869	0.385045	0.367263	0.631751	-0.0135917	0.241394	0.57218	0.90455			-0.334237	0.128659	0.217555	0.123809	-0.215813	0.247504	0.734764	0.0246634	-0.472891	-0.0108435	0.371991	-0.188447	0.316508	0.118486	0.16117	0.156246	0.0800483	0.479467	0.35391	0.0674975					0.0555913	0.454029	-0.156289	0.0420749	0.215562	0.00772706
-0.0612252	0.141285	0.105214	0.595728	0.426782	-0.052567	0.123606	-0.0114466	0.731044	-0.116876	0.378048	0.390087	0.37999	0.811735	-0.0173872	0.236772	0.472775	0.89913			-0.345606	0.112093	0.270307	0.122137	-0.216532	0.258752	0.69699	0.135053	-0.509965	-0.0284381	0.35841	-0.193749	0.314071	0.107195	0.198393	0.185956	0.0879004	0.483874	0.350059	0.0700333					0.0475813	0.443609	-0.165498	0.0259623	0.213385	0.00686286
-0.0616911	0.162033	0.0862457	0.649439	0.376825	-0.116729	0.170205	-0.00319251	0.720717	-0.1333	0.401188	0.393458	0.370742	0.987748	-0.02164	0.235252	0.464098	0.890168			-0.348189	0.120763	0.303462	0.126416	-0.194882	0.271282	0.636931	0.166842	-0.554268	-0.0214897	0.34046	-0.175796	0.314699	0.106548	0.1684	0.210469	0.0776239	0.488807	0.345567	0.0750925					0.0217152	0.443459	-0.159375	0.0287341	0.214792	0.00605742
-0.0590825	0.17337	0.105816	0.72372	0.299152	-0.108066	0.203392	0.000321778	0.748278	-0.142556	0.438403	0.367652	0.366539	0.919647	-0.0182721	0.234631	0.696722	0.873141			-0.370339	0.107976	0.338263	0.132775	-0.178231	0.276894	0.646971	0.204857	-0.581306	-0.026126	0.235145	-0.146562	0.303937	0.106592	0.196823	0.278208	0.0665008	0.4694	0.366236	0.0759614					0.0438097	0.446358	-0.148391	0.0134216	0.217339	0.00513901
-0.0575378	0.178956	0.148263	0.740731	0.232187	-0.111499	0.200111	0.00696217	0.757325	-0.152447	0.464549	0.351848	0.35095	0.962521	-0.0174219	0.235384	0.710684	0.848471			-0.425152	0.102444	0.321608	0.134538	-0.172088	0.25951	0.644398	0.164409	-0.617877	-0.0297164	0.197694	-0.123634	0.302526	0.094034	0.191397	0.311485	0.0600605	0.444826	0.360309	0.0769048					0.0787294	0.437072	-0.138928	0.0192119	0.216628	0.00700452
-0.0529952	0.215708	0.149187	0.730541	0.198172	-0.11238	0.213361	0.00590737	0.738944	-0.162255	0.455088	0.337183	0.345444	0.912518	-0.0178807	0.237054	0.762562	0.853935			-0.44445	0.123113	0.369656	0.129216	-0.171773	0.255622	0.752664	0.154082	-0.646193	-0.0325442	0.182499	-0.131974	0.301028	0.121328	0.177025	0.344079	0.0756848	0.453594	0.354253	0.071318					0.103487	0.435433	-0.131566	0.0157326	0.216678	0.00626707
-0.0539769	0.252013	0.155982	0.721249	0.163701	-0.11732	0.19465	0.0175489	0.734432	-0.162711	0.435566	0.30423	0.349437	0.888089	-0.0183919	0.235278	0.764048	0.86279			-0.401391	0.117655	0.537188	0.149236	-0.16094	0.257875	0.770187	0.306593	-0.669098	-0.0294909	0.101176	-0.139389	0.308844	0.170961	0.131996	0.370717	0.0618981	0.430543	0.323247	0.0733658					0.118692	0.432473	-0.126139	0.0134348	0.218953	0.00474279
-0.0566505	0.246947	0.221472	0.703839	0.105229	-0.119954	0.175987	0.0159316	0.824442	-0.168294	0.397328	0.283426	0.337355	0.857232	-0.0170015	0.234937	0.422681	0.874121			-0.38707	0.109832	0.728403	0.137194	-0.156599	0.236903	0.210353	0.341743	-0.693967	-0.0232331	0.126069	-0.153924	0.292685	0.160828	0.121983	0.394496	0.0770568	0.433846	0.320379	0.0697651					0.110724	0.432216	-0.116637	0.0214314	0.223957	0.000378714
-0.0601065	0.249246	0.264302	0.711962	0.0407172	-0.123344	0.162931	0.0174531	0.829727	-0.164845	0.368774	0.27455	0.334674	0.845579	-0.0187286	0.235137	0.350778	0.870199			-0.320003	0.122416	0.765761	0.116179	-0.132099	0.212156	0.121525	0.271326	-0.689915	-0.0292863	0.100604	-0.125852	0.291661	0.122665	0.111398	0.429486	0.0959419	0.438775	0.315646	0.0681299					0.111213	0.42675	-0.120229	0.0248922	0.232046	0.000774084
-0.0623741	0.265817	0.310449	0.704846	-0.0149394	-0.132413	0.159361	0.0164411	0.797599	-0.161536	0.362165	0.272464	0.311974	0.860036	-0.0178088	0.232679	0.050222	0.880003			-0.275961	0.118894	0.566792	0.118493	-0.12384	0.192574	0.0183673	0.315971	-0.643345	-0.0227262	0.163827	-0.157365	0.290866	0.12449	0.0824666	0.413713	0.106143	0.448787	0.338485	0.0687638					0.106838	0.432048	-0.107111	0.0223653	0.24371	0.00128347
-0.0663272	0.269566	0.369302	0.724492	0.0318125	-0.141937	0.126244	0.0153179	0.843517	-0.1497	0.340015	0.2761	0.291691	0.632603	-0.0126075	0.229059	0.044921	0.88655			-0.237146	0.127979	0.804739	0.111355	-0.143531	0.202803	-0.0571528	0.228005	-0.617121	-0.0244843	0.200282	-0.217632	0.282003	0.144395	0.128694	0.44987	0.122883	0.455635	0.335195	0.0694822					0.106566	0.425625	-0.10321	0.0177023	0.254577	0.00306709
-0.063577	0.291141	0.36865	0.709994	0.0238319	-0.141157	0.0841786	0.00957351	0.883764	-0.14868	0.317081	0.312864	0.276485	0.656208	0.028342	0.224195	-0.115814	0.896694			-0.23593	0.133704	0.946135	0.104327	-0.139264	0.189187	-0.0999838	0.196809	-0.621452	-0.0340535	0.225088	-0.267385	0.289453	0.117389	0.147071	0.436154	0.13128	0.466056	0.306329	0.0673998					0.143739	0.423212	-0.0968124	0.0252365	0.267995	0.00244118
-0.0553131	0.322774	0.363116	0.721232	0.0170072	-0.135298	0.00897551	0.000362937	0.866015	-0.126909	0.305212	0.320321	0.269371	0.396192	0.0286403	0.218778	-0.00744139	0.910832			-0.239909	0.134159	0.974152	0.103805	-0.152904	0.175558	-0.138393	0.208611	-0.61398	-0.027638	0.285128	-0.328656	0.286233	0.115352	0.166579	0.399898	0.147695	0.451718	0.280803	0.0681793					0.114645	0.421488	-0.083567	0.0262479	0.288936	0.000657979
-0.0529555	0.329402	0.4158	0.745608	0.0130107	-0.132418	-0.0479836	-0.00554077	0.881072	-0.0875634	0.315312	0.346167	0.26016	0.245307	0.0344438	0.212722	-0.0549839	0.915889			-0.2452	0.128062	0.895509	0.106306	-0.143538	0.182914	-0.253882	0.224433	-0.616766	-0.0338054	0.334168	-0.351057	0.291835	0.134847	0.201209	0.413186	0.143435	0.435162	0.278296	0.0662816					0.119769	0.411247	-0.0828324	0.0206392	0.309229	0.000736671
-0.0526733	0.339952	0.410464	0.762331	0.00597758	-0.131603	-0.0583117	0.00408688	0.860607	-0.0593931	0.324853	0.376402	0.253626	0.0729739	0.0790873	0.212211	0.161456	0.924186			-0.265762	0.142259	0.848106	0.0904478	-0.1424	0.219558	-0.304827	0.191545	-0.623008	-0.0389069	0.369058	-0.392375	0.297687	0.0995992	0.204947	0.409715	0.160442	0.439316	0.303334	0.0655556					0.121178	0.395176	-0.0885486	0.00959798	0.323604	0.00154045
-0.0496987	0.391895	0.410399	0.782512	-0.00939682	-0.131534	-0.0777691	-0.00214226	0.749723	-0.0108826	0.361686	0.416424	0.252946	-0.11898	0.0764553	0.211291	0.545661	0.931049			-0.279577	0.168379	0.839949	0.0898638	-0.124435	0.239818	-0.32227	0.155549	-0.559867	-0.0461754	0.425517	-0.39077	0.297831	0.0857597	0.209763	0.450479	0.160733	0.446707	0.348129	0.0678105					0.119931	0.384313	-0.0887304	-0.000451967	0.338315	0.000696696
-0.0499284	0.422681	0.42233	0.790044	-0.0192611	-0.135618	-0.0977506	0.00377997	0.688838	0.04486	0.351314	0.459683	0.248535	-0.0372203	0.077557	0.210366	0.829141	0.952456			-0.316553	0.170564	0.795339	0.0888493	-0.125079	0.256907	-0.244472	0.0372692	-0.526042	-0.0443713	0.519272	-0.43546	0.299069	0.0703101	0.196131	0.439375	0.158383	0.453201	0.346499	0.0608093					0.0963986	0.374423	-0.082821	-0.00569511	0.347895	0.00112035
-0.0458705	0.440713	0.423496	0.792949	-0.0281523	-0.13351	-0.121333	-0.00388893	0.642617	0.0955044	0.348898	0.484602	0.250789	-0.0917304	0.0812591	0.205428	1.09005	0.958659			-0.359881	0.165172	1.08038	0.0692351	-0.118864	0.265014	-0.112715	-0.0275322	-0.509008	-0.0426946	0.560784	-0.451074	0.295647	0.0792819	0.242442	0.449122	0.145393	0.457579	0.36871	0.060328					0.119158	0.369968	-0.0825673	-0.00832766	0.354761	0.00152006
-0.0403551	0.471134	0.412918	0.792193	-0.0366807	-0.133679	-0.118225	-0.0114715	0.576897	0.12323	0.343064	0.455435	0.259871	-0.0708716	0.082404	0.204474	1.09204	0.964906			-0.372121	0.170808	0.613946	0.0664767	-0.102831	0.252929	-0.0249441	-0.0695547	-0.518043	-0.0460399	0.624294	-0.422169	0.299486	0.0245871	0.242817	0.442285	0.134119	0.459564	0.369419	0.054581					0.137781	0.360917	-0.0761455	-0.00339231	0.35559	8.26158e-05
-0.0368317	0.502896	0.413445	0.793528	-0.0555369	-0.1285	-0.117858	-0.0124761	0.481164	0.171463	0.325033	0.438819	0.265985	-0.230945	0.0405673	0.201976	1.02723	0.962246			-0.367204	0.190423	0.357746	0.0610672	-0.100058	0.263943	0.105474	-0.138402	-0.500152	-0.0350533	0.786539	-0.4198	0.294491	0.0311566	0.183469	0.452479	0.12941	0.462829	0.399001	0.0544873					0.16035	0.346383	-0.071819	-0.00831267	0.355834	6.19011e-05
-0.043937	0.513754	0.380234	0.790858	-0.077913	-0.11887	-0.0730712	0.0138436	0.449354	0.207967	0.307712	0.435335	0.261897	-0.0283426	0.0440317	0.20308	0.937632	0.978156			-0.366992	0.206261	0.462365	0.0540051	-0.0876195	0.303021	0.207036	-0.237414	-0.513103	-0.031265	0.855535	-0.394163	0.286833	0.026868	0.17016	0.417734	0.11913	0.487589	0.400673	0.0514873					0.170071	0.340874	-0.0822593	-0.0148445	0.353071	0.00045764
-0.0505175	0.484877	0.367624	0.785254	-0.100286	-0.109433	-0.077402	0.0125816	0.371054	0.227729	0.29197	0.407899	0.257114	0.210795	0.0467874	0.203738	0.896734	0.995991			-0.358058	0.204365	0.395399	0.0565255	-0.0779984	0.324166	0.270237	-0.351608	-0.488263	-0.0276062	0.965646	-0.388403	0.264304	0.00131973	0.161917	0.39612	0.1172	0.511044	0.431936	0.0520333					0.175748	0.344294	-0.0802563	-0.0128607	0.351432	0.000359917
-0.0511966	0.453406	0.426723	0.789839	-0.116362	-0.102171	-0.124993	-0.0034558	0.337136	0.265605	0.303273	0.395553	0.253296	0.188462	0.00804795	0.198696	0.68933	1.01164			-0.364961	0.197075	0.512406	0.060253	-0.0727702	0.313891	0.326554	-0.32408	-0.466199	-0.0307298	1.02738	-0.363222	0.256139	0.0129804	0.168921	0.359628	0.119009	0.511538	0.435822	0.0519313					0.217268	0.338362	-0.0717481	-0.00608888	0.345557	0.000586216
-0.0392545	0.448251	0.426332	0.777957	-0.12448	-0.100419	-0.163393	-0.0072145	0.339461	0.270252	0.302851	0.337275	0.238141	0.397073	0.00933921	0.195095	0.322516	1.0256			-0.362282	0.196431	0.578272	0.0648303	-0.0917911	0.314767	0.451118	-0.281884	-0.513239	-0.0265744	1.15455	-0.387301	0.260205	0.0296691	0.137701	0.360176	0.12838	0.510271	0.419198	0.0462379					0.242624	0.347268	-0.0651002	-0.00849249	0.336003	0.000632857
-0.0382491	0.45272	0.419862	0.764632	-0.134496	-0.0967356	-0.197763	-0.00425764	0.33262	0.27118	0.308248	0.30398	0.236444	0.0783713	0.0127605	0.204439	0.0555146	1.02779			-0.363102	0.195862	0.553088	0.069739	-0.0999225	0.31525	0.470897	-0.236494	-0.529855	-0.0288966	1.11885	-0.387783	0.253645	0.071476	0.144592	0.340745	0.108807	0.514636	0.453025	0.0498886					0.292944	0.345143	-0.0656917	-0.000765986	0.333612	-0.000801109
-0.0355876	0.461775	0.436934	0.762098	-0.154023	-0.0965361	-0.200628	0.0183239	0.356141	0.257029	0.300739	0.25739	0.23562	0.117846	0.0123532	0.209247	-0.190166	1.04177			-0.364684	0.207701	0.414151	0.0827308	-0.0989266	0.318532	0.404237	-0.315356	-0.333448	-0.0281647	1.06226	-0.352042	0.237743	0.050157	0.151135	0.354248	0.112571	0.520208	0.438692	0.0507987					0.370728	0.353137	-0.0714543	0.000772018	0.335396	-0.000884243
-0.0399578	0.461542	0.450821	0.758998	-0.183689	-0.0926636	-0.206472	0.0406617	0.407017	0.267591	0.293437	0.268487	0.225366	0.32207	0.0109197	0.207626	0.045933	1.06214			-0.36086	0.291646	0.856835	0.083147	-0.0951843	0.330933	0.340803	-0.273425	-0.313864	-0.0317608	1.11683	-0.345307	0.230857	0.0790616	0.170784	0.338524	0.119686	0.525518	0.470341	0.0552308					0.411179	0.368527	-0.0769238	-0.0106955	0.335038	-0.000347661
-0.0470407	0.456405	0.460612	0.762204	-0.152131	-0.106645	-0.239197	0.04232	0.460679	0.263974	0.315597	0.244634	0.223884	0.268727	0.0115599	0.205426	0.261134	1.0814			-0.371775	0.272699	1.24328	0.0857716	-0.108475	0.319981	0.121956	-0.199024	-0.29059	-0.0440448	1.04868	-0.327408	0.225784	0.071614	0.234162	0.304759	0.114367	0.531108	0.474472	0.0590338					0.378773	0.38651	-0.087219	-0.00737002	0.333376	-0.000340869
-0.047715	0.447442	0.517625	0.767283	-0.122366	-0.120858	-0.23726	0.0384762	0.470394	0.249984	0.322411	0.233107	0.232202	0.174948	0.0105675	0.20548	0.580074	1.093			-0.399533	0.258387	1.11604	0.0956407	-0.12458	0.313787	-0.0138342	-0.120453	-0.355018	-0.0527335	0.980014	-0.348257	0.219528	0.0787194	0.270456	0.319598	0.110921	0.538619	0.476507	0.0633393					0.441203	0.407534	-0.0921598	-0.0182221	0.32681	-0.00140886
-0.044659	0.462426	0.532545	0.775054	-0.0962875	-0.144339	-0.244662	0.0600605	0.504547	0.251236	0.371718	0.234819	0.225314	-0.0301621	0.00868728	0.205861	0.583034	1.10308			-0.415029	0.265763	1.36319	0.103694	-0.143698	0.326004	-0.116638	-0.0189724	-0.190584	-0.0472269	0.846017	-0.350567	0.223846	0.0661834	0.322247	0.348359	0.111048	0.547523	0.480128	0.0697381					0.460794	0.426433	-0.0904468	-0.0276494	0.325957	-0.00207498
-0.0481944	0.468958	0.537899	0.781691	-0.0755271	-0.164958	-0.211502	0.079239	0.543366	0.23991	0.379223	0.230621	0.219779	-0.0615333	0.00694726	0.207454	0.664227	1.10332			-0.41932	0.274617	1.28297	0.0912115	-0.141775	0.331112	-0.11763	-0.156111	-0.0829545	-0.0464651	0.781502	-0.359668	0.225717	0.0602204	0.365379	0.366937	0.0959308	0.558556	0.485982	0.0739337					0.430371	0.451366	-0.102388	-0.0418978	0.327096	-0.00192702
-0.0556361	0.462092	0.567584	0.793287	-0.110261	-0.190054	-0.199485	0.10624	0.537106	0.249968	0.366012	0.241257	0.216749	-0.113129	0.0124214	0.20307	0.931099	1.11168			-0.431792	0.259105	1.30182	0.0836211	-0.127196	0.329788	0.331931	-0.214007	0.0900803	-0.0517094	0.665293	-0.342649	0.229506	0.0316768	0.384627	0.330085	0.078775	0.57056	0.462459	0.075588					0.434801	0.47017	-0.116922	-0.0479302	0.326182	-0.00176893
-0.0584775	0.472816	0.608133	0.805771	-0.101044	-0.209741	-0.196297	0.111187	0.537241	0.260988	0.391467	0.238195	0.206798	-0.00440601	0.0121735	0.18969	0.982509	1.1301			-0.423096	0.249212	1.13183	0.0773571	-0.111971	0.310927	0.301448	-0.216591	0.293826	-0.0515755	0.64828	-0.329057	0.237162	0.00244768	0.389439	0.344838	0.0953253	0.581025	0.465825	0.078136					0.404394	0.481082	-0.121898	-0.0592329	0.319184	-0.00181212
-0.062205	0.483409	0.639696	0.814322	-0.130183	-0.234436	-0.208718	0.110129	0.538552	0.289213	0.413329	0.264461	0.205362	-0.0453712	0.01204	0.190663	1.01401	1.11851			-0.429842	0.256376	1.33825	0.0759011	-0.0946527	0.284555	0.284873	-0.122536	0.226392	-0.0468664	0.668893	-0.307882	0.244763	0.00612731	0.422347	0.344668	0.0916476	0.586104	0.467326	0.0766051					0.348497	0.491373	-0.121946	-0.0606722	0.310688	-0.00127195
-0.0585977	0.498191	0.668409	0.829027	-0.154845	-0.253429	-0.222856	0.109754	0.554418	0.28853	0.452354	0.263958	0.205108	-0.0991894	0.0100928	0.189129	0.831174	1.12777			-0.412696	0.169107	1.13728	0.0706492	-0.100787	0.24961	0.294084	-0.0292016	0.166595	-0.0468354	0.58366	-0.297443	0.239777	-0.00305563	0.370162	0.338553	0.0879174	0.569344	0.489429	0.0766684					0.311736	0.502157	-0.129973	-0.0704254	0.302849	-0.000304998
-0.0499263	0.512808	0.68531	0.837495	-0.171091	-0.263848	-0.204731	0.129078	0.526104	0.299738	0.480964	0.280748	0.205486	-0.0802774	0.0102978	0.198726	0.619132	1.13954			-0.406856	0.181814	0.578467	0.0726572	-0.058741	0.239895	0.397631	-0.0636348	0.0761875	-0.0339229	0.516047	-0.30763	0.253319	0.014376	0.337505	0.303958	0.105628	0.572351	0.464798	0.0679215					0.287864	0.505242	-0.13701	-0.0872446	0.298019	-0.000684276
-0.0462678	0.541613	0.709779	0.853745	-0.190105	-0.27651	-0.229276	0.125689	0.525024	0.306533	0.490732	0.293805	0.190415	-0.188168	0.00985315	0.183343	0.359851	1.12995			-0.379441	0.177027	0.680225	0.058371	-0.0264858	0.225987	0.464866	-0.0827828	0.0951844	-0.0283042	0.55257	-0.322025	0.251384	0.0130559	0.283698	0.330139	0.113854	0.554292	0.496062	0.0676175					0.279978	0.505568	-0.147447	-0.0966659	0.29696	0.000136739
-0.0476534	0.574209	0.755209	0.878809	-0.214028	-0.273856	-0.222103	0.123141	0.514539	0.302858	0.40886	0.314949	0.202405	-0.0470869	0.00646147	0.183938	0.593402	1.12996			-0.358718	0.165311	0.180026	0.0343596	0.0285237	0.192963	0.524552	-0.148929	-0.134546	-0.0341095	0.604838	-0.338642	0.258312	0.041484	0.270831	0.323541	0.112421	0.553428	0.500298	0.0614531					0.263834	0.49721	-0.160879	-0.103543	0.290911	0.0017592
-0.0454682	0.618087	0.792061	0.913756	-0.241437	-0.270521	-0.200281	0.119272	0.494968	0.296269	0.359076	0.327728	0.213798	0.203684	0.00642742	0.179541	0.581199	1.12516			-0.336679	0.153285	0.159933	0.040019	0.047411	0.181822	0.490496	-0.0844073	0.0303302	-0.0243813	0.60302	-0.335315	0.261474	0.0258234	0.221056	0.317379	0.108792	0.528836	0.476042	0.0549902					0.29181	0.492951	-0.167786	-0.100028	0.287258	0.00182907
-0.0488874	0.641206	0.819654	0.952894	-0.206522	-0.258271	-0.180847	0.101463	0.521777	0.30102	0.331068	0.356887	0.230759	-0.00299436	0.00150188	0.177534	0.351043	1.12051			-0.317619	0.181123	-0.0356689	0.0424428	0.0960125	0.165177	-0.0805605	0.0153947	0.00109297	-0.0316728	0.566644	-0.336776	0.271573	0.0255302	0.287202	0.331961	0.10988	0.504543	0.510499	0.0486202					0.325305	0.485437	-0.164041	-0.101616	0.281476	0.00339766
-0.0407736	0.647869	0.857035	0.993092	-0.225165	-0.25193	-0.177217	0.0901231	0.541585	0.276649	0.340786	0.35681	0.240809	0.112259	0.0025808	0.189211	0.27471	1.10488			-0.343106	0.202399	0.0168676	0.0534167	0.113948	0.186303	-0.159329	0.0716828	-0.210324	-0.0273028	0.566593	-0.342942	0.263996	0.0322621	0.251652	0.335435	0.101974	0.500622	0.513742	0.0451674					0.350367	0.488013	-0.169904	-0.103032	0.277276	0.00410965
-0.0323605	0.650986	0.870555	1.012	-0.205801	-0.240895	-0.181225	0.0841581	0.542384	0.252057	0.299652	0.352209	0.23914	-0.0390893	0.00230918	0.178951	0.294452	1.09129			-0.326829	0.202325	-0.475575	0.0480772	0.134382	0.2223	-0.176823	0.0808768	-0.409041	-0.0276118	0.5212	-0.357302	0.266177	0.023289	0.188549	0.325427	0.0937274	0.50091	0.519101	0.0395806					0.34593	0.488907	-0.173289	-0.114995	0.272479	0.00496736
-0.0278381	0.668332	0.893277	1.03649	-0.193628	-0.235831	-0.191692	0.0769024	0.497885	0.258194	0.263817	0.379335	0.253996	-0.116395	0.00172222	0.175647	0.530379	1.06602			-0.349103	0.205734	-0.128242	0.0512762	0.180721	0.248471	-0.126924	0.0964749	-0.161749	-0.0233002	0.482709	-0.383304	0.292441	0.0353618	0.194233	0.341	0.081714	0.50078	0.477426	0.0378628					0.354118	0.477861	-0.167153	-0.108987	0.272863	0.00409565
-0.0320631	0.669896	0.925065	1.06794	-0.183723	-0.23096	-0.205367	0.0781181	0.4682	0.235317	0.21534	0.395691	0.258204	-0.0572452	0.00288048	0.165695	0.715414	1.04042			-0.356459	0.206566	0.0759301	0.0395091	0.211176	0.27003	-0.0892043	0.212362	0.0176797	-0.0267272	0.480326	-0.375873	0.287697	0.0376544	0.194745	0.411612	0.0592917	0.47616	0.505903	0.0419942					0.394227	0.471862	-0.16494	-0.109418	0.269888	0.00365411
-0.0337386	0.663253	0.944625	1.09422	-0.181503	-0.218922	-0.198151	0.0685964	0.445786	0.232428	0.193586	0.410848	0.260766	0.143947	0.00386321	0.184212	0.639853	1.03243			-0.375534	0.203033	-0.178847	0.0325787	0.288633	0.27599	-0.135726	0.205373	0.264586	-0.0251756	0.478464	-0.350141	0.311775	0.050606	0.202258	0.442947	0.0425954	0.472936	0.511708	0.0437594					0.340223	0.468337	-0.163699	-0.0901189	0.263961	0.00431078
-0.0329057	0.672061	0.953782	1.09939	-0.168549	-0.212371	-0.206785	0.0688331	0.435121	0.23681	0.229561	0.432166	0.270424	0.163443	0.00235843	0.18442	0.465206	1.00879			-0.37502	0.219983	-0.13762	0.0321405	0.324684	0.282029	-0.238132	0.324243	0.5497	-0.0238576	0.486681	-0.330858	0.321888	0.0312727	0.160249	0.467553	0.0428869	0.454073	0.514568	0.0426467					0.330993	0.518938	-0.154889	-0.0959161	0.259995	0.00250195
-0.0287961	0.678089	0.965735	1.07983	-0.148959	-0.195479	-0.250891	0.0688448	0.435075	0.245273	0.282941	0.463606	0.285037	0.149852	0.00175119	0.197221	0.691539	1.00842			-0.40826	0.232879	-0.14284	0.036635	0.39514	0.296883	-0.252973	0.310017	0.415017	-0.0312589	0.474796	-0.332899	0.335565	0.0288518	0.179248	0.50737	0.0416564	0.479623	0.543339	0.0443577					0.353184	0.562971	-0.147833	-0.0972953	0.256251	0.00299567
-0.0157385	0.671439	0.957365	1.05441	-0.155965	-0.168193	-0.236608	0.0695246	0.394198	0.297933	0.298442	0.47773	0.285534	0.456424	0.00155873	0.210852	0.964715	1.00185			-0.406213	0.218118	-0.344281	0.0234186	0.426888	0.306095	-0.223488	0.224674	0.379666	-0.0204962	0.470149	-0.333307	0.320464	0.0623119	0.139271	0.529434	0.045745	0.479299	0.547195	0.0529339					0.370534	0.594107	-0.139965	-0.0980709	0.25408	0.000869484
-0.0302633	0.67451	0.936767	1.04013	-0.134207	-0.140484	-0.202824	0.0597667	0.365063	0.299502	0.289058	0.506083	0.281284	0.532104	0.000593436	0.209829	1.05047	0.99344			-0.389679	0.193987	-0.549652	-0.000833646	0.497611	0.314073	-0.116083	0.150807	0.53236	-0.0222385	0.469376	-0.354808	0.336883	0.0556294	0.138815	0.528706	0.0463841	0.452257	0.549986	0.0505028					0.397838	0.660375	-0.127369	-0.0908406	0.250504	0.000778672
-0.0451038	0.67379	0.916365	1.04684	-0.122002	-0.110251	-0.157999	0.0653906	0.349873	0.314327	0.354027	0.540156	0.288069	0.74211	0.0399356	0.222964	1.06172	1.00735			-0.374333	0.195075	-0.276222	-0.00321427	0.550665	0.307787	-0.0639478	0.113285	0.520455	-0.0268479	0.472132	-0.361444	0.349734	0.0460912	0.118161	0.557763	0.0419672	0.428319	0.553364	0.0506042					0.441747	0.666375	-0.124709	-0.0800639	0.246821	4.2509e-06
-0.0445855	0.675868	0.908828	1.04217	-0.149958	-0.0818686	-0.152027	0.0738035	0.352773	0.306488	0.39267	0.554937	0.279316	0.69574	0.0406792	0.222779	0.767904	1.01222			-0.377615	0.215566	-0.563668	-0.0125957	0.623056	0.321928	-0.0932946	0.111317	0.304999	-0.0213352	0.471987	-0.340478	0.327798	0.0565789	0.0910882	0.594457	0.0560481	0.427886	0.584963	0.0454062					0.43901	0.760477	-0.121111	-0.0807706	0.241312	0.000908663
-0.0381976	0.650228	0.927071	1.03459	-0.126337	-0.0545387	-0.120249	0.0719267	0.369258	0.330737	0.444873	0.561833	0.283469	0.843723	0.040238	0.218409	0.574734	1.01711			-0.342652	0.214271	-0.583348	0.00334641	0.649179	0.318226	-0.106803	0.0744019	0.357399	-0.0229083	0.518325	-0.349585	0.331863	0.0308726	0.069693	0.608666	0.052968	0.419458	0.590635	0.0419576					0.447833	0.795486	-0.112464	-0.0794102	0.235005	0.00304874
-0.0252132	0.658375	0.946818	1.01384	-0.140204	-0.0316805	-0.0899864	0.0795298	0.367574	0.338552	0.478369	0.576144	0.295339	0.946426	0.0403679	0.199829	0.565466	1.0095			-0.326188	0.22196	-0.506654	0.00866175	0.655212	0.319177	-0.020798	0.0472841	0.297772	-0.0331487	0.467358	-0.37018	0.314499	0.0083235	0.118152	0.538858	0.0642787	0.413709	0.596004	0.0335278					0.478317	0.84755	-0.104859	-0.0784363	0.228651	0.00347841
-0.0349313	0.642068	0.949748	0.995199	-0.160642	-0.00430247	-0.0516444	0.0748335	0.378978	0.329764	0.498588	0.589042	0.28323	0.935797	0.0452644	0.198646	0.632994	1.00953			-0.306094	0.204005	-0.0677071	0.0112839	0.699714	0.310617	0.117318	0.0185161	0.203314	-0.0302846	0.417073	-0.383058	0.29918	-0.00552351	0.189937	0.568133	0.0572908	0.401183	0.599409	0.0336928					0.491358	0.802553	-0.092179	-0.075791	0.219452	0.00526213
-0.028774	0.60192	0.941494	1.00458	-0.192049	0.0145907	-0.0434533	0.0759108	0.367703	0.321845	0.479874	0.600804	0.285	0.726874	0.0475781	0.198738	0.328357	0.998291			-0.284153	0.20278	-0.245769	-0.00624756	0.764668	0.292283	0.141129	0.0309694	0.0273635	-0.034131	0.479934	-0.395775	0.294356	0.00714753	0.167611	0.543126	0.0606447	0.373913	0.603565	0.0320304					0.442375	0.829695	-0.0776838	-0.060504	0.213363	0.00391005
-0.0556528	0.603982	0.962985	1.00413	-0.202139	0.0189939	-0.0852186	0.087069	0.401583	0.241228	0.520165	0.62477	0.274818	0.65911	0.0525958	0.188525	0.179753	0.984089			-0.28512	0.203994	-0.234768	0.000595884	0.800645	0.297429	0.165672	0.0777945	-0.12098	-0.0308119	0.479122	-0.390747	0.298599	-0.0190614	0.126983	0.56382	0.055457	0.368205	0.575471	0.0289289					0.4021	0.84507	-0.0728988	-0.0588696	0.207401	0.00447954
-0.0382882	0.573417	0.972069	0.998872	-0.242297	0.0258258	-0.071433	0.102084	0.408669	0.24969	0.547466	0.646425	0.300635	0.645305	0.0526771	0.183085	0.0965912	0.974979			-0.28914	0.202829	-0.215699	0.00870669	0.806984	0.282703	0.0501538	0.135101	-0.27509	-0.0333622	0.464791	-0.361529	0.302114	0.00468682	0.120001	0.589623	0.0565725	0.364994	0.579533	0.0352553					0.340744	0.804801	-0.0669346	-0.0626374	0.204029	0.00389326
-0.015391	0.580599	1.01476	0.994436	-0.272522	0.0286497	-0.0768039	0.100449	0.397637	0.232973	0.550882	0.656209	0.308715	0.639722	0.0124331	0.168768	0.0762853	0.959203			-0.309864	0.198682	-0.434687	-0.00640552	0.816858	0.285058	0.0439715	0.203615	-0.060559	-0.0354859	0.457402	-0.353082	0.297712	0.0573559	0.181663	0.60888	0.0726918	0.361797	0.574922	0.0354573					0.306969	0.834476	-0.0654585	-0.0658368	0.199686	0.00320436
-0.00890507	0.555652	1.01645	0.989879	-0.262827	0.0308493	-0.0768716	0.121594	0.404899	0.222972	0.52671	0.652557	0.319037	0.769818	0.0128466	0.165149	0.373578	0.948267			-0.303159	0.159	-0.643727	-0.00389102	0.781751	0.28141	-0.0167423	0.157523	0.107869	-0.0383072	0.494822	-0.361857	0.299094	0.0382693	0.198117	0.591566	0.0630076	0.361624	0.570853	0.0348537					0.298986	0.784063	-0.063918	-0.0619109	0.197196	0.00420325
-0.00236019	0.590395	1.0088	0.962699	-0.303899	0.0426627	-0.105796	0.1182	0.399956	0.204901	0.428949	0.642385	0.332939	0.574451	0.0122999	0.173246	0.38399	0.935981			-0.301791	0.145355	-0.795586	-0.021423	0.783642	0.313831	0.00542186	0.135981	-0.114682	-0.0399688	0.485992	-0.363556	0.302325	0.0498676	0.217162	0.537227	0.0759217	0.365057	0.571737	0.0324771					0.244926	0.806541	-0.0614231	-0.0606611	0.194039	0.0022079
-0.0220612	0.526902	1.01553	0.94041	-0.290735	0.0494875	-0.120151	0.137839	0.418872	0.194431	0.415454	0.6112	0.329358	0.28834	0.00876671	0.171416	0.388407	0.92979			-0.267173	0.139006	-0.862519	-0.0237568	0.784833	0.339797	0.0559269	0.0875043	-0.0273151	-0.0310287	0.53684	-0.357267	0.286225	0.0553741	0.224353	0.617521	0.064229	0.372546	0.564264	0.0394789					0.257219	0.785379	-0.0522458	-0.0671542	0.190813	0.000968853
-0.00475943	0.499832	1.02578	0.93178	-0.283586	0.0421288	-0.12721	0.153479	0.400736	0.185203	0.420626	0.56639	0.341533	0.28284	0.00361554	0.166993	0.308874	0.914425			-0.263574	0.204809	-1.09481	-0.0207224	0.766201	0.367007	0.0276486	0.0861417	-0.00774973	-0.0320332	0.532327	-0.329116	0.297739	0.0912785	0.119666	0.599283	0.0615813	0.377648	0.56122	0.0393092					0.295396	0.869293	-0.0449657	-0.05522	0.188677	0.000649452
-0.0036595	0.488088	1.04897	0.917816	-0.267118	0.0386852	-0.102749	0.166101	0.403146	0.17121	0.46215	0.510417	0.328376	0.508218	0.00116906	0.169901	0.356172	0.90141			-0.17118	0.196197	-0.981722	-0.020234	0.725734	0.394066	0.0479738	0.155737	-0.0184263	-0.0265412	0.472619	-0.308903	0.295215	0.108192	0.126811	0.628555	0.0673718	0.38448	0.558941	0.040678					0.294897	0.883249	-0.0366836	-0.0735895	0.185275	0.000506732
0.0241806	0.488152	1.04891	0.915877	-0.263992	0.0355052	-0.11189	0.170015	0.407684	0.171105	0.411164	0.46	0.343808	0.283246	-0.00562843	0.167356	0.180641	0.892691			-0.17458	0.19923	-0.605233	-0.0282664	0.705047	0.398104	0.0225178	0.14748	0.194032	-0.0360226	0.464423	-0.303171	0.284318	0.123692	0.155693	0.611247	0.0710211	0.385282	0.582917	0.0369256					0.280848	0.906569	-0.0305625	-0.076975	0.186947	-0.000212486
0.0134224	0.51963	1.06891	0.911436	-0.251153	0.0287381	-0.165461	0.181203	0.404504	0.160572	0.402511	0.415437	0.336187	0.24932	-0.00794716	0.166532	0.184173	0.877708			-0.161846	0.189423	-0.651704	-0.0210209	0.675551	0.416207	0.0867758	0.104587	0.372544	-0.0345901	0.517231	-0.316899	0.265758	0.102386	0.158664	0.617521	0.0641271	0.391525	0.549104	0.0316355					0.328833	0.922444	-0.0236712	-0.0778232	0.185374	0.000944549
0.0105617	0.532738	1.07242	0.921149	-0.23956	0.0314864	-0.206896	0.186845	0.421567	0.153698	0.329119	0.377855	0.321538	0.225953	0.00875856	0.173036	0.170057	0.872676			-0.168565	0.179358	-0.596687	-0.0236459	0.651104	0.422447	0.127986	0.265228	0.367287	-0.0332293	0.570517	-0.315316	0.258544	0.0601743	0.170321	0.596873	0.0531692	0.391658	0.520869	0.0310213					0.319371	0.95201	-0.00851823	-0.085536	0.181195	0.00252893
0.00710938	0.527824	1.08313	0.901935	-0.22564	0.0309078	-0.191043	0.167561	0.429849	0.160451	0.278901	0.364152	0.331628	0.0426477	0.00606694	0.175502	0.0210979	0.858546			-0.154839	0.190931	-0.469893	-0.0195824	0.648296	0.428788	0.189102	0.226275	0.434246	-0.032656	0.53421	-0.326863	0.261893	0.0649456	0.162692	0.582643	0.0645152	0.386634	0.520068	0.0328174					0.327082	0.958219	0.00105465	-0.0974982	0.177605	0.000583132
0.000170022	0.474215	1.06856	0.918807	-0.215612	0.0251689	-0.161398	0.175874	0.465618	0.169455	0.360869	0.370513	0.321907	0.236956	0.00189604	0.179113	0.0464464	0.850197			-0.198663	0.188277	-0.51198	-0.0266732	0.642233	0.410652	0.188944	0.206021	0.459146	-0.0285029	0.510244	-0.311693	0.261626	0.0865425	0.166231	0.611818	0.053196	0.38373	0.533813	0.0360517					0.381148	0.949181	0.0114076	-0.095209	0.175732	0.00324161
0.0111867	0.519522	1.04212	0.953487	-0.220217	0.0295829	-0.15661	0.165065	0.432073	0.177483	0.370252	0.381914	0.325684	0.399305	0.00713358	0.181687	0.0938145	0.836423			-0.175629	0.187604	-0.618209	-0.0238224	0.614748	0.382821	0.0948894	0.277259	0.487457	-0.0303405	0.47743	-0.296946	0.287346	0.104265	0.134422	0.593311	0.0471711	0.380629	0.551996	0.0321829					0.33174	1.00494	0.029354	-0.0997121	0.173388	0.00417007
0.0123751	0.514775	1.02457	0.975223	-0.230914	0.0397132	-0.161841	0.159832	0.427111	0.206186	0.366681	0.401957	0.322952	0.398022	0.0115213	0.172742	0.0335514	0.830126			-0.233691	0.118468	-0.79664	-0.0190433	0.583569	0.36875	0.0467173	0.225071	0.281837	-0.0363435	0.542565	-0.325473	0.282341	0.061538	0.148512	0.587863	0.0527689	0.379209	0.569743	0.0332225					0.318572	0.999523	0.0321132	-0.10676	0.169677	0.00347062
0.0168305	0.527915	1.0009	0.976171	-0.237718	0.0572945	-0.175409	0.160105	0.402689	0.234912	0.275284	0.411477	0.325395	0.235297	0.0124691	0.155278	0.229177	0.814262			-0.337942	0.110679	-0.676056	-0.0221495	0.531777	0.346879	0.00113215	0.110552	0.461101	-0.0341771	0.563121	-0.353116	0.277617	0.0803089	0.151325	0.57965	0.0462323	0.372401	0.567135	0.0318066					0.354823	0.97114	0.0342436	-0.102102	0.168313	0.00629998
0.0179505	0.526804	0.978569	0.98626	-0.249981	0.077996	-0.161243	0.16313	0.387549	0.257204	0.240322	0.410566	0.320011	0.496273	0.0193838	0.161381	0.236552	0.796895			-0.318049	0.0942592	-0.593364	-0.00545913	0.523944	0.33411	0.0212855	-0.0131828	0.449395	-0.0236801	0.548921	-0.373914	0.293909	0.062808	0.123393	0.558138	0.0343986	0.368576	0.583012	0.0352977					0.340623	0.941821	0.0370054	-0.103088	0.16395	0.00630995
0.0326646	0.473062	0.988848	0.996998	-0.258925	0.106652	-0.118568	0.160068	0.406619	0.277867	0.221669	0.400882	0.315502	0.291378	0.022625	0.150392	0.246687	0.792206			-0.326835	0.110694	-0.591819	0.00103156	0.508417	0.327681	0.131959	0.015475	0.242095	-0.0365054	0.516726	-0.364679	0.297893	0.0465299	0.129682	0.542857	0.0298975	0.357911	0.609443	0.0341119					0.299818	0.942861	0.0434208	-0.105115	0.160293	0.00804205
0.0269181	0.410434	0.992607	1.00334	-0.259428	0.0936339	-0.128626	0.157997	0.353261	0.336841	0.277426	0.393495	0.316754	0.0661607	0.00764883	0.134982	0.211194	0.781929			-0.314727	0.123125	-0.461389	0.00829838	0.514029	0.336726	0.142234	-0.257569	0.166829	-0.0317781	0.471793	-0.369924	0.306342	0.0352427	0.0666001	0.538898	0.0366217	0.347136	0.634819	0.0332571					0.294694	0.919528	0.0442804	-0.101974	0.154929	0.00875507
0.0259217	0.379855	1.02289	1.01838	-0.261749	0.0804721	-0.152436	0.154914	0.293929	0.402048	0.368119	0.389712	0.300338	0.0690255	0.012136	0.119666	0.0765727	0.779857			-0.336844	0.10346	-0.324519	0.00959337	0.499602	0.332253	0.160135	-0.133111	0.00871518	-0.0344684	0.518047	-0.347129	0.294115	0.0210202	0.0934355	0.548426	0.0256755	0.341908	0.63485	0.0328312					0.32243	0.927214	0.0444901	-0.0916326	0.151813	0.0127479
0.0345461	0.369459	1.06641	0.974528	-0.266211	0.0646599	-0.197545	0.153122	0.252109	0.398973	0.373938	0.378069	0.299818	-0.103125	0.0160009	0.106763	0.050225	0.767771			-0.28317	0.100691	-0.112845	0.0157905	0.477682	0.333797	0.114336	-0.133958	0.161653	-0.0384218	0.50876	-0.362066	0.286992	-0.0102394	0.143089	0.503125	0.0314143	0.33451	0.631393	0.0330641					0.270336	0.931418	0.0413004	-0.0918312	0.153256	0.011921
0.047204	0.335191	1.09262	0.894723	-0.262628	0.0408424	-0.217769	0.162251	0.261198	0.411205	0.315561	0.361722	0.294803	-0.249654	0.0186884	0.0994574	0.159505	0.766465			-0.306797	0.0936253	-0.175873	0.00804234	0.456275	0.346891	0.144356	-0.0967076	0.0397834	-0.0410373	0.540366	-0.362684	0.278612	-0.0377538	0.198121	0.48953	0.0420222	0.321324	0.612775	0.0313956					0.25738	0.893963	0.0304813	-0.0838938	0.154904	0.0109133
0.0541848	0.357984	1.08613	0.822356	-0.250688	0.0199973	-0.245929	0.164212	0.261235	0.403976	0.258886	0.340423	0.295461	-0.206087	0.0239403	0.10399	0.375784	0.761556			-0.248978	0.0864427	0.204982	-0.0108617	0.459254	0.371641	0.202876	-0.0689724	0.163558	-0.0428054	0.478782	-0.354998	0.271411	-0.00696832	0.27007	0.443051	0.0384078	0.313456	0.591729	0.0290031					0.203558	0.875949	0.0323155	-0.0915855	0.154866	0.01043
0.0514906	0.334671	1.10921	0.768165	-0.243835	-0.0126701	-0.287036	0.161188	0.276013	0.392387	0.350507	0.335529	0.287488	-0.261429	0.0274312	0.0981087	0.133435	0.759736			-0.233289	0.0833198	0.270409	-0.0142122	0.491095	0.39833	0.22373	-0.0617144	0.146552	-0.0425391	0.467544	-0.327381	0.266618	-0.0317301	0.280975	0.41408	0.0366098	0.301773	0.588337	0.027353					0.145209	0.896652	0.0310821	-0.0990709	0.150362	0.00805323
0.0450821	0.28089	1.12785	0.705456	-0.226209	-0.0424578	-0.285249	0.158672	0.293877	0.390033	0.448973	0.312394	0.2797	-0.496072	0.0316481	0.0768939	0.179531	0.750525			-0.237443	0.124449	0.165558	-0.02866	0.504436	0.432894	0.198391	0.0941627	0.0825496	-0.0464085	0.538157	-0.320052	0.263185	-0.0218211	0.298868	0.425211	0.0351059	0.296532	0.571531	0.0244891					0.189375	0.893814	0.0263753	-0.102447	0.146811	0.00830384
0.0402607	0.298805	1.09025	0.637306	-0.207605	-0.0791084	-0.332965	0.156917	0.306082	0.361736	0.415162	0.296999	0.279535	-0.505247	0.0341264	0.064546	0.161825	0.742641			-0.204392	0.122952	0.478553	-0.0438393	0.501897	0.461504	0.11118	0.047984	0.238222	-0.0296916	0.530372	-0.322191	0.272537	-0.000454742	0.376599	0.378009	0.0322146	0.296277	0.567058	0.0225696					0.176264	0.949191	0.0145672	-0.104392	0.144084	0.0062395
0.0455049	0.322713	1.06218	0.549643	-0.194028	-0.0847749	-0.311452	0.166295	0.347995	0.320927	0.388707	0.287132	0.280195	-0.287774	0.0778142	0.0608844	0.337122	0.729579			-0.225468	0.170939	0.707606	-0.0398426	0.487944	0.462922	0.0340082	0.0121278	0.280291	-0.033084	0.537576	-0.336009	0.256028	0.0118024	0.399178	0.354484	0.0355529	0.294346	0.565114	0.0241229					0.167055	0.998771	0.00810575	-0.107695	0.145799	0.00473099
0.0363514	0.305035	1.06372	0.489325	-0.187155	-0.0841146	-0.300867	0.175304	0.435206	0.260832	0.317312	0.270388	0.286564	-0.06886	0.0793977	0.0619472	0.322959	0.700221			-0.18989	0.179654	0.517752	-0.0432362	0.490369	0.467227	-0.00628944	-0.0959167	0.316332	-0.0414629	0.491722	-0.339976	0.260191	0.0516744	0.40119	0.34981	0.036557	0.296734	0.579558	0.0233862					0.13453	1.00865	0.00799576	-0.113944	0.142906	0.0014546
0.0341168	0.320565	1.00846	0.466615	-0.173985	-0.0838647	-0.293882	0.18326	0.462114	0.268084	0.24212	0.24703	0.274961	-0.0640128	0.085784	0.0497896	0.363632	0.679396			-0.198433	0.191919	0.65742	-0.0542071	0.487959	0.47605	-0.0512269	-0.0918333	0.2591	-0.0284209	0.496182	-0.333692	0.25274	0.0495837	0.333929	0.375849	0.0298179	0.302915	0.580181	0.02281					0.171477	1.01093	0.00767043	-0.119831	0.136335	0.00131409
0.0339071	0.343142	0.967651	0.469513	-0.163931	-0.0850753	-0.303574	0.17944	0.510905	0.254963	0.30214	0.230702	0.271528	0.116678	0.0876469	0.0535301	0.340397	0.658657			-0.208266	0.142148	0.645687	-0.0551654	0.480014	0.48243	-0.070478	-0.127623	0.289137	-0.0229066	0.46084	-0.347757	0.253814	0.0759342	0.28016	0.358465	0.0132101	0.299021	0.596147	0.0223121					0.170494	1.01869	-0.00191059	-0.139544	0.132064	0.00178159
0.0261643	0.293188	1.00763	0.47397	-0.159361	-0.079318	-0.296088	0.179736	0.554835	0.251026	0.284898	0.242454	0.263847	0.125597	0.0891444	0.0395113	0.151023	0.636783			-0.24918	0.152345	0.598461	-0.0390894	0.468247	0.474925	-0.152904	-0.130922	0.158537	-0.0194402	0.51437	-0.345109	0.265273	0.0660087	0.201856	0.372455	0.00573939	0.304262	0.591318	0.0242402					0.219093	1.0645	0.00104291	-0.144325	0.129183	0.00658722
0.0270392	0.315751	0.956493	0.473556	-0.163391	-0.0739699	-0.254043	0.195383	0.617579	0.239218	0.27528	0.247606	0.260765	0.110022	0.0893242	0.0388234	0.295756	0.619243			-0.235532	0.161396	0.392867	-0.0255406	0.421075	0.480136	0.117188	0.0126648	0.201141	-0.0190361	0.51223	-0.335492	0.274044	0.028904	0.214419	0.381017	0.0129922	0.30191	0.587285	0.024974					0.216246	1.07358	-0.0148815	-0.145407	0.127966	0.00835523
0.0361493	0.303119	0.958049	0.476924	-0.176966	-0.0722363	-0.225021	0.213684	0.623242	0.223561	0.255548	0.278809	0.262537	0.123669	0.0893043	0.0383219	0.541974	0.608474			-0.185945	0.123201	0.38795	-0.00524877	0.383214	0.470514	0.178038	0.0131826	0.280876	-0.0211159	0.458916	-0.332237	0.272749	0.0316267	0.240841	0.372447	0.0256373	0.302262	0.59908	0.0256758					0.179415	1.10433	-0.00931958	-0.149973	0.124633	0.00823634
0.0441503	0.289317	0.969324	0.485766	-0.192646	-0.0684572	-0.196582	0.227675	0.632555	0.24823	0.264234	0.289821	0.262516	0.162261	0.0885595	0.043127	0.798991	0.59775			-0.207459	0.11241	0.55119	0.00615352	0.364375	0.448608	0.128482	0.123536	0.15385	-0.0321378	0.455929	-0.354818	0.255427	0.00243385	0.152548	0.394632	0.0327972	0.303802	0.617936	0.0294914					0.220273	1.06625	-0.0181285	-0.150265	0.126235	0.00883428
0.0427858	0.260119	0.948508	0.548932	-0.205563	-0.0572487	-0.194839	0.237511	0.661981	0.240992	0.289144	0.297449	0.254361	0.167415	0.053413	0.048988	0.824269	0.593426			-0.153678	0.0589439	0.590023	0.0176584	0.327696	0.456296	0.136207	0.23213	0.168517	-0.0340372	0.442382	-0.345635	0.266452	0.00548783	0.118848	0.394877	0.0199485	0.308403	0.637502	0.0323809					0.209336	1.0864	-0.0223517	-0.149854	0.125687	0.00914512
0.0555263	0.281751	0.900371	0.541288	-0.212483	-0.0518951	-0.212412	0.237548	0.675836	0.217637	0.312085	0.302605	0.238628	0.154713	0.0558463	0.0522528	0.867954	0.604087			-0.156271	0.0523026	0.704908	0.0180906	0.299603	0.462791	0.0987639	0.267382	0.262225	-0.0194578	0.442073	-0.355572	0.260325	-0.0396062	0.146491	0.374293	0.0121718	0.30906	0.622199	0.0316611					0.205272	1.12432	-0.0371951	-0.158955	0.12215	0.00827245
0.0516496	0.254452	0.901104	0.548183	-0.221755	-0.0462118	-0.206735	0.248217	0.729218	0.196035	0.335159	0.320623	0.24991	0.192612	0.0564306	0.0589311	0.881964	0.606077			-0.155795	0.037295	0.831326	0.0205942	0.297383	0.460377	0.083762	0.190777	0.180593	-0.0326917	0.437385	-0.353873	0.278881	-0.0317947	0.118729	0.374926	0.0153845	0.287959	0.620754	0.0292538					0.168661	1.10159	-0.0332045	-0.168295	0.121778	0.00792545
0.0516829	0.215942	0.899247	0.552469	-0.225862	-0.0401105	-0.210357	0.247692	0.75122	0.181999	0.298352	0.338195	0.257887	0.24727	0.0542201	0.052112	1.0335	0.607696			-0.159378	0.0991986	1.07764	0.0167636	0.3349	0.434737	0.0201172	0.165206	0.193673	-0.0306556	0.412589	-0.346815	0.273287	-0.021091	0.134637	0.358091	0.0368365	0.292948	0.602699	0.0282608					0.212658	1.069	-0.0155978	-0.161545	0.118689	0.00743661
0.059857	0.239114	0.872057	0.558625	-0.223775	-0.0381099	-0.23251	0.258817	0.744781	0.165664	0.345243	0.331958	0.259022	0.0862744	0.0521248	0.049837	1.18934	0.60125			-0.12733	0.10578	1.15817	-0.000694492	0.314258	0.437683	0.0628915	0.161533	0.419255	-0.023412	0.356716	-0.341414	0.274567	-0.00529675	0.190911	0.366046	0.0462842	0.28809	0.623158	0.0278655					0.213164	0.980925	-0.0358175	-0.158426	0.117563	0.00234569
0.0505032	0.211829	0.883647	0.556103	-0.210181	-0.0294168	-0.224572	0.250458	0.743483	0.168113	0.325717	0.323738	0.267936	0.120783	0.0581563	0.0439101	1.09149	0.590773			-0.118144	0.158709	1.39144	-0.015484	0.300913	0.432921	-0.189682	0.0486395	0.377479	-0.0233708	0.361308	-0.363779	0.271349	0.0386235	0.165855	0.364049	0.0464601	0.270823	0.625634	0.0292019					0.229391	0.917455	-0.0313861	-0.155426	0.119267	0.00341608
0.0367957	0.196595	0.897718	0.553021	-0.193219	-0.0234688	-0.244502	0.237218	0.746221	0.179057	0.29201	0.301306	0.266302	0.165124	0.0535525	0.0500699	0.859727	0.579607			-0.149066	0.158059	1.48646	-0.0318277	0.290394	0.423972	-0.252402	0.126862	0.387086	-0.0192007	0.364045	-0.366516	0.262602	0.031016	0.119983	0.359043	0.0405812	0.246354	0.62528	0.0301094					0.227228	0.860978	-0.0351759	-0.151864	0.120125	0.00384932
0.0256799	0.19588	0.907696	0.590873	-0.179164	-0.0180866	-0.242028	0.233052	0.731701	0.154095	0.286297	0.286103	0.264416	0.11485	0.0576601	0.0482787	0.663036	0.564807			-0.135805	0.164619	1.27229	-0.0463408	0.306943	0.441553	-0.242839	0.0420218	0.578754	-0.0204643	0.340941	-0.348549	0.261536	0.046953	0.163268	0.363618	0.0410105	0.218799	0.62361	0.0279041					0.241348	0.825576	-0.021291	-0.165471	0.116919	0.00677967
0.0316082	0.173531	0.917823	0.530143	-0.163304	-0.0218692	-0.313283	0.224891	0.740607	0.135762	0.27326	0.274853	0.245606	-0.113161	0.0558616	0.0444751	0.505294	0.547852			-0.1655	0.219077	1.2862	-0.0527311	0.307743	0.451514	-0.264033	0.140548	0.649514	-0.0260051	0.343618	-0.359848	0.243465	0.0301715	0.179821	0.362716	0.063339	0.193236	0.625397	0.0282483					0.311135	0.729027	-0.0329459	-0.170094	0.11602	0.00527283
0.0347067	0.152722	0.918062	0.511413	-0.151021	-0.0271639	-0.277127	0.231654	0.705715	0.146313	0.275696	0.247206	0.220388	-0.260131	0.0973721	0.0449969	0.53766	0.530737			-0.106133	0.291952	1.28416	-0.0546997	0.298776	0.47269	-0.235124	0.243613	0.438599	-0.0297089	0.352906	-0.354893	0.246359	0.0583494	0.159156	0.352378	0.0633928	0.184636	0.642169	0.0294072					0.370821	0.652071	-0.0237858	-0.173712	0.116211	0.00627931
0.0470525	0.161291	0.92846	0.480957	-0.14078	-0.0283481	-0.267112	0.231694	0.66314	0.157456	0.303179	0.218228	0.203594	-0.327833	0.0994829	0.0436029	0.805111	0.523859			-0.0924865	0.294387	0.884622	-0.0465835	0.27342	0.484947	-0.241888	0.440271	0.417807	-0.0348028	0.353533	-0.344333	0.228604	0.053556	0.180411	0.368044	0.0651597	0.196776	0.625552	0.0331783					0.419629	0.649042	-0.0365085	-0.171297	0.116185	0.0055206
0.0524517	0.151163	0.938147	0.455925	-0.13017	-0.0320246	-0.268488	0.239954	0.660139	0.159121	0.310029	0.210477	0.198799	-0.334813	0.103123	0.0512867	0.590812	0.517118			-0.0175945	0.282361	0.75985	-0.0339801	0.229709	0.526054	-0.237963	0.557599	0.235583	-0.035346	0.370295	-0.335099	0.241542	0.0389695	0.152463	0.408075	0.0610138	0.193163	0.642265	0.035086					0.403756	0.649381	-0.0438429	-0.172577	0.116496	0.00915022
0.059471	0.0933359	0.924759	0.419952	-0.12075	-0.0373999	-0.265025	0.233357	0.687844	0.147688	0.323026	0.203724	0.197498	-0.289812	0.110745	0.0600022	0.47268	0.518641			0.0154934	0.281694	0.773327	-0.0247568	0.211629	0.541055	-0.28975	0.581832	0.0635624	-0.0396604	0.377471	-0.32548	0.230082	0.0121604	0.154408	0.404823	0.0539967	0.172637	0.62274	0.0356432					0.377203	0.660346	-0.0362489	-0.172744	0.114713	0.0102208
0.0768636	0.0821287	0.962172	0.441439	-0.118735	-0.0430176	-0.275397	0.231043	0.663486	0.14443	0.300237	0.18094	0.191006	-0.3417	0.10701	0.0703705	0.539287	0.517577			0.0201019	0.28009	0.417067	-0.013117	0.228532	0.553046	-0.250048	0.631997	-0.0667501	-0.0396375	0.372278	-0.31924	0.216038	-0.0185527	0.200438	0.410901	0.0524221	0.190774	0.641275	0.0312461					0.390508	0.654399	-0.0348768	-0.179064	0.113854	0.00704552
0.0952682	0.11626	0.915813	0.411033	-0.111161	-0.0436086	-0.295716	0.233898	0.670694	0.121948	0.304591	0.192727	0.198166	-0.331942	0.111463	0.0697762	0.711244	0.523314			0.0990675	0.285223	0.236973	-0.00829148	0.225558	0.572019	-0.231919	0.558212	0.0354352	-0.0442128	0.371638	-0.31353	0.217903	-0.0235047	0.261563	0.397416	0.0530931	0.21253	0.64463	0.0298432					0.402222	0.66534	-0.0426072	-0.182443	0.113251	0.00579814
0.110498	0.146399	0.836542	0.372439	-0.107633	-0.0445525	-0.297351	0.229782	0.685211	0.122618	0.314185	0.206744	0.191579	-0.328106	0.116805	0.0707257	0.784577	0.529973			0.196631	0.288017	0.533204	0.00807303	0.207544	0.574426	-0.21469	0.628858	0.133404	-0.0417757	0.375631	-0.302144	0.233156	-0.024435	0.23076	0.407044	0.0581491	0.211603	0.625439	0.0297572					0.378051	0.663294	-0.0524344	-0.178531	0.111344	0.00129441
0.114505	0.187443	0.782657	0.33831	-0.10934	-0.0446315	-0.255307	0.225657	0.663181	0.13226	0.326245	0.181475	0.21122	-0.144871	0.119576	0.0713534	0.871757	0.531607			0.31427	0.301318	0.456768	0.00692252	0.205102	0.585366	-0.210423	0.515557	0.164435	-0.0313947	0.35022	-0.28687	0.245352	-0.00505962	0.270014	0.407145	0.0490237	0.225182	0.616599	0.0251738					0.387387	0.664296	-0.03787	-0.178994	0.108314	0.00215519
0.124842	0.192927	0.708711	0.364738	-0.117235	-0.0410964	-0.290829	0.216658	0.66846	0.131469	0.322192	0.175589	0.243291	-0.130465	0.12246	0.0665954	0.871694	0.528061			0.268444	0.288501	0.465263	0.0127433	0.207469	0.579449	-0.192778	0.409654	0.413848	-0.0306436	0.331687	-0.294614	0.25915	-0.0155198	0.238014	0.436317	0.0577482	0.225094	0.612181	0.0243077					0.35056	0.657287	-0.0409529	-0.178572	0.106983	0.000914531
0.113699	0.218575	0.642661	0.387172	-0.128159	-0.042176	-0.285931	0.208891	0.666681	0.126697	0.312349	0.171491	0.246792	0.0362359	0.128361	0.0664275	0.692629	0.528521			0.260066	0.332264	0.806469	0.0173451	0.20779	0.581664	-0.13957	0.289326	0.439902	-0.0278638	0.302002	-0.303257	0.267068	0.00433076	0.30063	0.420502	0.0511202	0.203745	0.626441	0.0204296					0.309607	0.651931	-0.0406175	-0.176526	0.102141	-9.24761e-05
0.10473	0.241715	0.562722	0.408252	-0.132487	-0.0339643	-0.258887	0.177178	0.60753	0.180298	0.314169	0.177506	0.24046	-0.0391753	0.129821	0.0611202	0.789605	0.535167			0.191557	0.401349	0.817629	0.00493925	0.206685	0.56551	-0.153982	0.178578	0.432904	-0.0405512	0.283067	-0.305338	0.252367	0.00705296	0.298305	0.401779	0.0479947	0.184936	0.621708	0.017062					0.34832	0.646231	-0.0526318	-0.18005	0.0981984	-0.00317129
0.102521	0.318006	0.475436	0.389894	-0.132657	-0.0268296	-0.25135	0.160947	0.555426	0.228189	0.318415	0.181513	0.242652	-0.177847	0.127496	0.0561759	0.871162	0.522965			0.164276	0.391986	0.512919	0.00160676	0.202641	0.564375	-0.153332	0.127116	0.604512	-0.0438967	0.255999	-0.322814	0.252427	0.00546356	0.302585	0.420277	0.0540236	0.182131	0.640481	0.0147858					0.349229	0.62531	-0.0595362	-0.181763	0.0967976	0.00229789
0.103064	0.360302	0.368185	0.324561	-0.131575	-0.0289569	-0.245002	0.146559	0.551619	0.221437	0.337486	0.183895	0.239018	-0.192057	0.132849	0.0517035	0.862913	0.526346			0.113059	0.339945	0.575244	0.00387473	0.180986	0.571108	-0.263526	0.0905569	0.617274	-0.0535739	0.227797	-0.323956	0.267455	0.0373793	0.256407	0.373888	0.053557	0.177861	0.62014	0.0148329					0.338878	0.630196	-0.0600154	-0.179566	0.0910707	0.0024682
0.100345	0.367392	0.284198	0.344116	-0.128196	-0.0297019	-0.214946	0.136568	0.55694	0.221447	0.342486	0.165593	0.229186	-0.224687	0.136048	0.047851	0.750127	0.516969			0.0190288	0.368106	0.808127	0.00578743	0.166001	0.572869	-0.25183	0.0595257	0.348834	-0.0485914	0.198102	-0.315174	0.260989	0.0559048	0.218776	0.369144	0.0561011	0.155685	0.61344	0.0155323					0.344915	0.624387	-0.0626157	-0.179118	0.0869687	0.00417601
0.0998764	0.349087	0.244827	0.316331	-0.117111	-0.0327596	-0.236002	0.131409	0.551086	0.202543	0.346635	0.170901	0.229962	-0.121664	0.135038	0.0456899	0.756666	0.512356			-0.0886249	0.356594	0.656575	0.00831317	0.158811	0.573583	-0.162205	0.0644024	0.290315	-0.0488682	0.212446	-0.317571	0.275762	0.0720093	0.205948	0.350416	0.0488835	0.169856	0.629128	0.0174004					0.326868	0.627525	-0.065494	-0.182288	0.0829641	0.00555219
0.0986911	0.350754	0.219997	0.337297	-0.117522	-0.0298087	-0.214082	0.130879	0.519802	0.228741	0.349779	0.207571	0.196175	-0.27693	0.172267	0.0441307	0.745541	0.507711			-0.170003	0.266055	0.375459	0.0106478	0.163214	0.551395	-0.0765272	-0.0034236	0.282406	-0.0552688	0.226454	-0.320187	0.280548	0.0447092	0.208559	0.356769	0.0401834	0.169812	0.629187	0.0186499					0.271256	0.624939	-0.077191	-0.183581	0.0800284	0.00453749
0.0969597	0.377983	0.19333	0.303589	-0.109001	-0.0242025	-0.191244	0.131833	0.508895	0.228738	0.364986	0.244732	0.193329	-0.16417	0.134262	0.0439746	0.802485	0.510251			-0.120142	0.265958	0.647501	0.005758	0.164092	0.55283	0.0311888	-0.0397079	0.2645	-0.0534526	0.207912	-0.314798	0.283206	0.0328184	0.279458	0.333526	0.0419305	0.145849	0.629075	0.0201452					0.256899	0.619378	-0.0863481	-0.176997	0.077506	0.0055072
0.106209	0.369168	0.160899	0.281767	-0.0953977	-0.0133887	-0.190342	0.125875	0.482667	0.21864	0.367714	0.254788	0.191453	-0.317867	0.130528	0.0462897	0.775452	0.507026			-0.118919	0.211638	0.448545	-0.00024727	0.169953	0.553622	0.0426126	-0.00925989	0.507041	-0.0549297	0.222419	-0.311879	0.277144	0.0206976	0.237878	0.311941	0.0355467	0.143045	0.627777	0.0215303					0.268079	0.619358	-0.0813767	-0.179843	0.0750123	0.00639798
0.111725	0.388024	0.135711	0.265078	-0.0741826	-0.011481	-0.219698	0.146037	0.445575	0.206139	0.383328	0.243318	0.182507	-0.47917	0.129539	0.0457763	0.760558	0.487837			-0.113358	0.1539	0.423196	0.0031997	0.170933	0.555105	0.145798	0.0353219	0.536149	-0.0419466	0.235603	-0.295231	0.277251	-0.00364416	0.257921	0.300771	0.0337186	0.139151	0.624776	0.0255867					0.274203	0.617191	-0.0704505	-0.17682	0.0740519	0.00796321
0.106708	0.379272	0.123393	0.299298	-0.0656328	-0.00269732	-0.231358	0.158616	0.46591	0.164725	0.377159	0.226662	0.174854	-0.478675	0.130109	0.0476674	0.730642	0.495249			-0.0867089	0.193602	0.455965	0.00193157	0.183024	0.532377	0.290883	0.130701	0.391148	-0.0382814	0.256309	-0.275253	0.271425	0.00294239	0.230802	0.26189	0.0307594	0.132957	0.619784	0.0260112					0.272448	0.617392	-0.0685258	-0.175223	0.0703405	0.0023213
0.101209	0.345431	0.100912	0.334532	-0.0553381	0.00783775	-0.22636	0.175884	0.428776	0.205492	0.363489	0.221542	0.14739	-0.402924	0.131613	0.0415944	0.731703	0.486662			-0.0249589	0.18913	0.454915	0.00998051	0.191444	0.509	0.418071	0.130786	0.418843	-0.0348783	0.262096	-0.286127	0.256448	-0.0123027	0.313752	0.270837	0.0258551	0.114527	0.63657	0.0279262					0.283944	0.609676	-0.0678909	-0.178659	0.0674358	0.00197198
0.100846	0.328818	0.0864947	0.333295	-0.0410939	0.0106237	-0.269845	0.198422	0.413066	0.203793	0.345446	0.234426	0.12492	-0.398016	0.170781	0.0416043	0.659906	0.476291			-0.0267352	0.150655	0.170625	0.0211116	0.177375	0.498189	0.420586	0.157361	0.409103	-0.0334132	0.257475	-0.285982	0.271074	0.0191216	0.309643	0.262807	0.020566	0.111553	0.636722	0.0281186					0.289385	0.609589	-0.0687827	-0.176989	0.0650395	0.0016514
0.102197	0.299425	0.0637309	0.346977	-0.0333851	0.0154089	-0.255946	0.211141	0.415093	0.213549	0.35433	0.206035	0.118059	-0.450012	0.169367	0.0425818	0.696639	0.466915			-0.0144193	0.207712	-0.017171	0.0232978	0.183306	0.481031	0.314052	0.154848	0.471623	-0.0277267	0.24422	-0.283619	0.257219	-0.00154565	0.306537	0.248564	0.0230555	0.0949628	0.640101	0.0254302					0.306079	0.596906	-0.06843	-0.176284	0.0616249	0.00105794
0.103485	0.26443	0.0274522	0.363357	-0.0156286	0.0206682	-0.265332	0.220088	0.460222	0.170248	0.339956	0.178961	0.139872	-0.358303	0.168134	0.0447403	0.72561	0.460225			-0.0317959	0.217313	0.01795	0.0204579	0.179847	0.472255	0.360589	0.215806	0.266459	-0.0207102	0.226996	-0.275088	0.243298	-0.0016175	0.267605	0.213385	0.0233437	0.0823989	0.642927	0.0246905					0.355466	0.596711	-0.0668423	-0.179263	0.0565328	0.00265503
0.0950756	0.250993	0.0332389	0.391847	-0.00522293	0.0224186	-0.317508	0.231298	0.425115	0.22016	0.344887	0.149579	0.135756	-0.477566	0.168097	0.0439336	0.696619	0.449107			0.00925651	0.209643	-0.296445	0.0250198	0.204231	0.441139	0.329417	0.217349	0.468465	-0.0263941	0.241366	-0.262824	0.229789	0.0357108	0.198255	0.181455	0.0222287	0.0883012	0.638018	0.0216515					0.36503	0.6021	-0.0589059	-0.185585	0.053946	0.00284731
0.0932082	0.241826	0.00863444	0.417048	0.00287789	0.0232746	-0.354187	0.24892	0.411779	0.274504	0.356036	0.135285	0.135052	-0.364833	0.166168	0.0444486	0.834429	0.43755			0.0168827	0.253708	-0.387027	0.0344672	0.188714	0.434383	0.468307	0.258156	0.257993	-0.0202601	0.223723	-0.258782	0.229715	0.078964	0.203522	0.15505	0.0328083	0.0970663	0.635406	0.0207976					0.368632	0.594683	-0.0699416	-0.179584	0.0529897	0.00237473
0.094083	0.222183	0.01291	0.429635	-0.036216	0.0273128	-0.347246	0.265819	0.458602	0.259032	0.335007	0.0739547	0.114261	-0.140294	0.168881	0.0442029	0.79107	0.432724			0.0357247	0.305176	-0.400436	0.0404048	0.167484	0.436969	0.606854	0.298666	0.23024	-0.0202035	0.224439	-0.2782	0.220822	0.129622	0.190495	0.148836	0.0367066	0.108758	0.617056	0.0196894					0.329595	0.598418	-0.0811682	-0.180814	0.0487734	0.000175628
0.0961157	0.197767	0.0066084	0.429701	-0.0389803	0.0303622	-0.338756	0.279487	0.395364	0.291653	0.346013	-0.158592	0.120699	-0.0967813	0.164909	0.0466645	0.865514	0.419233			0.0419262	0.295113	-0.477929	0.050943	0.172082	0.428415	0.621175	0.243864	0.201645	-0.0279837	0.219293	-0.296918	0.224228	0.152224	0.149939	0.123867	0.0257772	0.130128	0.614338	0.0181168					0.32802	0.611515	-0.0920037	-0.18775	0.0449532	-0.000550268
0.0968383	0.183369	-0.00423	0.426033	-0.0525342	0.0317338	-0.352965	0.285179	0.427003	0.23698	0.350846	-0.158592	0.14737	-0.0855107	0.160763	0.0459926	0.844628	0.413438			0.19457	0.287296	-0.294157	0.0370058	0.180678	0.41244	0.665819	0.315873	0.161049	-0.0192876	0.218103	-0.289447	0.224047	0.222712	0.0792042	0.10298	0.0282637	0.148477	0.607811	0.0208145					0.327742	0.613012	-0.0967924	-0.18967	0.0428731	-0.000200661
0.0962666	0.186056	-0.0174673	0.414356	-0.0731614	0.0598917	-0.319313	0.277976	0.413138	0.235808	0.385431	-0.158592	0.172827	-0.0321623	0.152829	0.0441802	1.04455	0.414406			0.232578	0.273348	-0.379533	0.0179613	0.203182	0.401143	0.736845	0.291824	0.541917	-0.016442	0.255627	-0.285507	0.207485	0.232055	0.0586861	0.0699644	0.0231213	0.17178	0.604956	0.0194017					0.329431	0.614481	-0.0966021	-0.19439	0.0376862	0.00215008
0.0930397	0.214416	-0.0073407	0.403895	-0.0844697	0.0895466	-0.313217	0.275161	0.353953	0.292851	0.349375	-0.158592	0.18245	0.00193199	0.153252	0.0479991	1.16887	0.40653			0.244234	0.218527	-0.382419	0.0104079	0.207123	0.407336	0.887895	0.325162	0.27223	-0.0257497	0.257691	-0.277029	0.204204	0.287177	0.0687417	0.0624717	0.017706	0.191564	0.597905	0.0205887					0.32858	0.626658	-0.0990055	-0.190077	0.0374351	0.00191814
0.0917227	0.230961	-0.00925553	0.397482	-0.0943675	0.113406	-0.298452	0.271799	0.3469	0.29396	0.37158	-0.158592	0.196341	0.145146	0.115534	0.0491671	1.35604	0.389596			0.343238	0.209727	-0.394178	0.0169066	0.201633	0.43177	0.940857	0.384582	0.260365	-0.0386051	0.267454	-0.286266	0.21789	0.348662	0.044866	0.0623072	0.0295994	0.214948	0.592714	0.0216181					0.28018	0.64245	-0.0969809	-0.187409	0.0374739	0.000233257
0.0963796	0.209534	-0.0319167	0.384804	-0.102505	0.143703	-0.254137	0.270699	0.407105	0.23184	0.387998	-0.158592	0.215547	0.140843	0.114273	0.0489512	1.53053	0.386681			0.247266	0.158711	-0.403707	0.014868	0.176118	0.466431	1.03935	0.412136	-0.125112	-0.0321871	0.273257	-0.302287	0.222105	0.343643	0.0703614	0.0495785	0.0223523	0.237445	0.591188	0.0216163					0.319318	0.649588	-0.0991584	-0.191964	0.0339622	-5.02787e-06
0.101271	0.222877	-0.0307164	0.386379	-0.109265	0.172941	-0.219115	0.264774	0.431883	0.177205	0.404639	-0.158592	0.216718	0.0340492	0.113615	0.0404076	1.38419	0.378194			0.235676	0.125188	0.203277	0.00146456	0.186061	0.47987	0.957812	0.387618	0.107069	-0.0293794	0.305213	-0.304685	0.217441	0.302127	0.0311261	0.0526548	0.0182895	0.263524	0.588662	0.023269					0.318524	0.664567	-0.1004	-0.203664	0.0295718	-0.000124768
0.0943812	0.234438	-0.065843	0.382193	-0.0814932	0.199481	-0.218314	0.258946	0.468747	0.135616	0.427532	-0.158592	0.251931	-0.197975	0.147497	0.0416096	1.43386	0.373484			0.303721	0.0637146	0.283291	0.0171986	0.207591	0.480147	0.824662	0.261777	0.146059	-0.028509	0.310968	-0.305651	0.244521	0.246823	0.0235577	0.0547028	0.0090648	0.290936	0.60425	0.0246102					0.318557	0.670935	-0.104885	-0.210841	0.0291985	-0.00123889
0.0868943	0.252656	-0.0616947	0.38433	-0.0827622	0.218768	-0.197142	0.253619	0.593569	0.0903171	0.420989	-0.158592	0.26744	-0.185611	0.189902	0.0421446	1.3634	0.371365			0.300608	0.0361512	0.361256	0.0204596	0.217958	0.508001	0.749341	0.249866	0.215378	-0.0161699	0.329302	-0.318596	0.251449	0.242988	0.0638767	0.0642717	0.0181447	0.311795	0.582799	0.0245786					0.313104	0.673787	-0.103226	-0.206616	0.0295521	0.00174941
0.0804879	0.283253	-0.0428813	0.379928	-0.0686003	0.241328	-0.199711	0.246515	0.577459	0.09188	0.465764	-0.158592	0.2798	-0.17986	0.190036	0.0445893	1.56407	0.365889			0.231337	0.0552429	0.181789	0.0268641	0.233913	0.536771	0.648717	0.203535	0.235436	-0.0215269	0.352451	-0.315352	0.263511	0.167231	0.111218	0.0972481	0.00539258	0.327752	0.579725	0.0215813					0.345496	0.68699	-0.112457	-0.208905	0.0282331	0.000974269
0.0773906	0.310474	-0.0177194	0.379991	-0.0523044	0.24344	-0.199753	0.247323	0.623981	0.0888961	0.483278	-0.158592	0.290094	-0.287229	0.15901	0.046399	1.70433	0.3631			0.194715	0.111941	0.220042	0.0469261	0.223366	0.555384	0.583343	0.22901	-0.11038	-0.0298901	0.345784	-0.337014	0.264167	0.123852	0.138666	0.115705	0.00672278	0.340366	0.578024	0.0184458					0.3343	0.696783	-0.123127	-0.216203	0.0283259	0.00510013
0.0813832	0.310609	-0.00296219	0.368663	-0.0359803	0.246071	-0.210081	0.251116	0.728448	0.0227338	0.545113	-0.158592	0.277587	-0.088867	0.198007	0.0404443	1.48735	0.367774			0.291434	0.166206	0.134991	0.0618341	0.218571	0.564775	0.487399	0.160709	-0.0559673	-0.0306535	0.367185	-0.347501	0.257612	0.0922015	0.139997	0.1188	0.00977871	0.357905	0.572235	0.019067					0.353524	0.710558	-0.12563	-0.223728	0.0250922	0.00841149
0.0797693	0.306248	0.002847	0.352762	-0.0576517	0.239701	-0.226408	0.254836	0.764464	0.0288462	0.503671	-0.158592	0.278863	-0.352132	0.196241	0.03458	1.24687	0.372463			0.20282	0.180743	0.447572	0.0719658	0.250922	0.548835	0.40595	0.125317	-0.0111441	-0.020865	0.387761	-0.345988	0.253777	0.104301	0.16918	0.108539	-0.0111051	0.368702	0.566441	0.0172421					0.396189	0.703265	-0.125891	-0.23446	0.0231338	0.00946035
0.0741701	0.306373	0.00612339	0.342112	-0.0372285	0.234204	-0.248489	0.250359	0.714196	0.0255688	0.463767	-0.158592	0.275645	-0.345913	0.193489	0.0330427	1.16366	0.368968			0.294957	0.176027	0.794095	0.0789404	0.262163	0.524473	0.296679	0.0846956	0.00717877	-0.0201408	0.399198	-0.334496	0.259636	0.104135	0.168619	0.15	-0.00751327	0.37754	0.560657	0.0199465					0.348515	0.711553	-0.13648	-0.236303	0.0256259	0.00974218
0.0581497	0.298446	0.0194632	0.315532	-0.0512174	0.224282	-0.24987	0.24546	0.748573	0.0156727	0.410428	-0.158592	0.277239	-0.271828	0.193885	0.032548	1.20818	0.373164			0.316787	0.192998	0.593353	0.0894215	0.288579	0.519858	0.318024	0.0181242	-0.171997	-0.0197962	0.38786	-0.333515	0.271535	0.0798886	0.198056	0.175461	-0.00988133	0.384527	0.554633	0.0190241					0.369469	0.711995	-0.137319	-0.239316	0.0283307	0.0108826
0.054599	0.29548	0.0452784	0.303084	-0.0626159	0.215105	-0.24557	0.244773	0.711283	0.0195169	0.393328	-0.158592	0.27521	-0.0452614	0.154922	0.0232297	1.15885	0.379077			0.312546	0.19921	0.536844	0.0796309	0.308515	0.538619	0.253807	0.156229	-0.0924195	-0.0163212	0.394341	-0.330882	0.265327	0.108631	0.227498	0.180698	-0.00248741	0.389389	0.550092	0.0167136					0.387263	0.710936	-0.139606	-0.242472	0.0265697	0.0127919
0.05965	0.293857	0.0330772	0.284388	-0.0749938	0.202036	-0.280592	0.287586	0.623185	0.0528649	0.413227	-0.158592	0.26241	0.15123	0.110639	0.0168942	1.22043	0.382174			0.439103	0.244656	0.539626	0.0761668	0.301564	0.52886	0.368763	0.0917706	-0.0491757	-0.025846	0.391511	-0.320597	0.266109	0.114189	0.196902	0.193793	-0.0149138	0.392455	0.545021	0.0175808					0.427955	0.699241	-0.139304	-0.253377	0.0281314	0.0111772
0.0598663	0.277292	0.0268091	0.27832	-0.0913673	0.18515	-0.296371	0.284115	0.655602	0.0523078	0.420684	-0.158592	0.257991	0.343625	0.110235	0.0143448	1.03183	0.382098			0.375241	0.267939	0.76384	0.0785313	0.290729	0.521773	0.565869	0.166259	0.0021035	-0.0298569	0.401675	-0.323162	0.247967	0.103121	0.138068	0.214879	-0.000635568	0.397044	0.543935	0.0206407					0.418574	0.684361	-0.136568	-0.257063	0.0283932	0.0136695
0.0562343	0.256935	0.0319351	0.271957	-0.113352	0.169234	-0.321479	0.323664	0.63972	0.0532435	0.41731	-0.158592	0.250927	0.429518	0.105616	0.0129544	0.797151	0.384802			0.419876	0.232731	0.827294	0.0734206	0.313202	0.513747	0.858025	0.156911	0.0229561	-0.0307955	0.406026	-0.313502	0.260811	0.0923286	0.126671	0.224992	-0.012663	0.398907	0.536972	0.0222772					0.418515	0.669674	-0.126954	-0.253651	0.0303273	0.00807427
0.0445919	0.242572	0.0290742	0.266234	-0.140709	0.151622	-0.320297	0.362294	0.565626	0.0693501	0.429763	-0.158592	0.260642	0.141233	0.0615756	0.0124866	1.06173	0.378192			0.429054	0.180129	0.965852	0.0688152	0.323563	0.511532	1.10379	0.213795	0.0154866	-0.0180858	0.398657	-0.322966	0.263521	0.0762126	0.134763	0.184491	-0.00873185	0.395623	0.533433	0.0198888					0.422252	0.653016	-0.119197	-0.253549	0.0311116	0.00415583
0.0383182	0.239739	0.0395564	0.263857	-0.131936	0.144313	-0.324924	0.359601	0.543082	0.0553432	0.444943	-0.158592	0.263942	0.368814	0.0601644	0.00843055	1.21554	0.378492			0.515478	0.17678	0.682996	0.0647725	0.317335	0.507451	1.18961	0.240733	-0.00556174	-0.0118808	0.387847	-0.326628	0.266431	0.0185774	0.184677	0.210678	-0.00213326	0.393982	0.530818	0.0189094					0.409577	0.637435	-0.123792	-0.250508	0.032768	0.00445615
0.0341261	0.244249	0.0474332	0.261933	-0.15726	0.123936	-0.323485	0.367529	0.513731	0.0942325	0.479293	-0.158592	0.255533	0.587341	0.0581269	0.00219779	1.33968	0.375784			0.495758	0.185341	0.697952	0.06388	0.316505	0.521424	1.21123	0.316114	0.022923	-0.0174142	0.374054	-0.328076	0.257148	0.00706295	0.153688	0.206611	-0.00262214	0.400674	0.525011	0.017827					0.436658	0.623598	-0.114923	-0.248941	0.0334104	0.00360422
0.0411241	0.229406	0.0474676	0.258868	-0.143907	0.111008	-0.365465	0.381385	0.517731	0.0973078	0.519365	-0.158592	0.258491	0.610062	0.0925813	-0.00335216	1.32659	0.370252			0.50271	0.19889	0.624246	0.0603151	0.305275	0.503655	1.16923	0.335943	0.00765267	-0.0294513	0.371732	-0.317183	0.260224	0.0424073	0.239854	0.196084	-0.000206071	0.404441	0.524096	0.0201479					0.403948	0.611436	-0.104208	-0.247634	0.0321697	0.00356924
0.0471636	0.220323	0.0513434	0.254836	-0.135778	0.100786	-0.364665	0.431052	0.547696	0.0946402	0.546835	-0.158592	0.249834	0.662304	0.0938641	-0.00294819	1.26096	0.364712			0.436517	0.219643	0.687243	0.0646519	0.306343	0.484442	1.23455	0.242859	-0.0452622	-0.0367719	0.357868	-0.313498	0.245522	0.029813	0.240744	0.200351	-0.00806428	0.408874	0.522141	0.0202357					0.407205	0.600461	-0.0961019	-0.248574	0.0321517	0.00404674
0.0409039	0.203092	0.0640243	0.256504	-0.122456	0.0881095	-0.364013	0.387801	0.565722	0.120115	0.523604	-0.158592	0.245055	0.55191	0.0921377	-0.00474055	1.36211	0.360758			0.427635	0.164149	0.723467	0.0650881	0.316293	0.485574	1.05187	0.189409	-0.0439809	-0.0318313	0.337365	-0.300455	0.247427	0.0305589	0.298297	0.21063	0.0140287	0.41126	0.538878	0.02084					0.411273	0.595718	-0.0874139	-0.249302	0.0288773	0.00383138
0.0344943	0.207125	0.0649629	0.240175	-0.113778	0.0785707	-0.349629	0.391576	0.524255	0.178148	0.483236	-0.158592	0.239392	0.581435	0.0906793	-0.000556269	1.35454	0.364457			0.490322	0.132336	0.531939	0.0757064	0.326506	0.471671	0.899675	0.0933602	0.0199708	-0.022715	0.324113	-0.304961	0.268522	0.0508281	0.306624	0.17979	0.00355789	0.413927	0.535404	0.0204681					0.425532	0.591308	-0.0806617	-0.249124	0.0270291	0.00244761
0.0239046	0.205051	0.0591655	0.228706	-0.0956877	0.070192	-0.360483	0.350256	0.498726	0.188308	0.46688	-0.158592	0.227949	0.781401	0.0891772	0.0083734	1.39907	0.364058			0.44486	0.171422	0.498824	0.0640005	0.343533	0.462893	0.608167	0.147389	0.0644307	-0.0154438	0.305969	-0.294502	0.264362	0.062886	0.325707	0.176742	0.0237524	0.42251	0.536935	0.0212812					0.434272	0.586659	-0.0809438	-0.255174	0.0255727	0.00218631
0.0234743	0.201564	0.0569461	0.218622	-0.103504	0.0614993	-0.371142	0.362687	0.527467	0.177953	0.451706	-0.158592	0.225735	0.994676	0.0881429	0.0144132	1.13706	0.366189			0.408191	0.216253	0.41259	0.0620075	0.360606	0.444159	0.348091	0.132661	0.138743	-0.0180908	0.3095	-0.278472	0.25788	0.0765097	0.329975	0.214283	0.0211589	0.41637	0.537333	0.0237768					0.445867	0.576404	-0.0852761	-0.262996	0.0257388	0.00218464
0.0233191	0.198147	0.0606495	0.214983	-0.0937809	0.0538905	-0.363097	0.41856	0.513584	0.185827	0.431205	-0.158592	0.217196	0.82933	0.0850238	0.0231169	1.01748	0.372166			0.38372	0.229105	0.353599	0.0618808	0.354061	0.438473	0.259941	0.103244	0.182534	-0.026332	0.29946	-0.273737	0.248077	0.0843532	0.286629	0.226476	0.0203401	0.420981	0.536308	0.0232202					0.455983	0.573925	-0.0752991	-0.266045	0.0226199	0.0028124
0.0202648	0.195743	0.0618435	0.205997	-0.0853956	0.0620686	-0.356101	0.422449	0.572323	0.14882	0.427579	-0.158592	0.150119	0.763885	0.0847717	0.0334556	0.903986	0.377739			0.424068	0.253494	0.401282	0.0529862	0.360691	0.419374	0.284265	0.123467	0.182428	-0.0264631	0.293797	-0.27325	0.261751	0.0828416	0.3091	0.232761	0.0220949	0.422019	0.537029	0.0236691					0.44505	0.564024	-0.0668305	-0.26853	0.0168064	0.00305883
0.00764044	0.187004	0.067896	0.196281	-0.0656657	0.0626585	-0.316226	0.420981	0.574644	0.159818	0.454382	-0.158592	0.140057	0.845765	0.0454573	0.0552176	0.918553	0.384702			0.482837	0.242161	0.159484	0.0599478	0.375316	0.42792	0.271698	0.170008	0.192018	-0.0140674	0.303728	-0.292278	0.243438	0.074693	0.231739	0.254619	0.0265737	0.421101	0.538599	0.0198637					0.464414	0.550149	-0.0667287	-0.270984	0.0134987	0.00229485
-0.0057229	0.162782	0.0689455	0.180354	-0.0363446	0.0609562	-0.360105	0.370304	0.553339	0.216146	0.42175	-0.158592	0.141544	0.590621	0.042509	0.0660946	1.05119	0.383023			0.524235	0.210098	0.181323	0.0593229	0.382827	0.442478	0.290457	0.226013	0.173389	-0.0178317	0.294625	-0.285063	0.260652	0.102678	0.216803	0.241519	0.0265254	0.412339	0.536085	0.0203504					0.447264	0.542103	-0.0648071	-0.275936	0.0133318	0.00131719
-0.0153496	0.16757	0.0665882	0.168313	-0.00789306	0.0743438	-0.382937	0.36913	0.527519	0.204688	0.463203	-0.158592	0.133718	0.447203	0.0411128	0.0730618	0.887192	0.382811			0.435219	0.225741	0.130049	0.0461015	0.407919	0.46041	0.340416	0.248061	0.144529	-0.0225204	0.30269	-0.277619	0.260693	0.0885299	0.192562	0.245827	0.0226573	0.411125	0.538562	0.0191736					0.42729	0.530188	-0.0630946	-0.276668	0.0110107	0.001001
-0.0120736	0.151518	0.0694553	0.178594	-0.017739	0.0905278	-0.372796	0.370105	0.574632	0.160392	0.477261	-0.158592	0.117241	0.393043	0.0370646	0.0739439	0.897839	0.383651			0.390709	0.253024	0.443552	0.0356491	0.432762	0.480232	0.30989	0.332696	0.110347	-0.0237302	0.306357	-0.252455	0.242543	0.0585384	0.273474	0.262502	0.0293728	0.415182	0.538883	0.0163					0.428426	0.515019	-0.0602781	-0.280557	0.00870279	0.00157377
-0.011628	0.127355	0.039031	0.192222	-0.0272855	0.102405	-0.348546	0.364598	0.557785	0.195952	0.464076	-0.158592	0.116073	0.305895	0.0554694	0.0704832	0.750494	0.389154			0.475043	0.205966	0.607257	0.0403124	0.426601	0.503889	0.352125	0.205048	0.0812122	-0.0302122	0.302318	-0.25294	0.260376	0.0530498	0.25203	0.282177	0.0169556	0.394165	0.535352	0.017784					0.469497	0.511931	-0.0565117	-0.278102	0.00558566	0.00183801
-0.0157786	0.112068	0.0252343	0.217286	-0.00786218	0.11378	-0.337636	0.302875	0.490503	0.250086	0.457043	-0.158592	0.109629	0.32185	0.0562508	0.0713687	0.778949	0.395423			0.465612	0.174257	0.681066	0.029575	0.430214	0.525357	0.353667	0.262025	0.0364149	-0.0403117	0.277988	-0.249562	0.276914	0.0689712	0.22269	0.304059	0.00639625	0.388772	0.534786	0.0157295					0.480847	0.498907	-0.0454165	-0.277997	0.00307533	0.00378594
-0.0255977	0.0922915	-0.0138633	0.238756	-0.00833386	0.119117	-0.344108	0.289531	0.503129	0.245079	0.446771	-0.158592	0.0868221	0.547578	0.0574627	0.0734788	0.774697	0.404587			0.416187	0.185262	0.770269	0.00770154	0.439897	0.532925	0.338046	0.233817	0.0339096	-0.0299564	0.27555	-0.238045	0.271126	0.0814936	0.243144	0.295627	0.0178218	0.391145	0.531376	0.0188565					0.459646	0.482137	-0.0250937	-0.278091	0.00087335	0.00367314
-0.0371828	0.0622198	-0.0464288	0.263521	-0.00754544	0.112734	-0.346264	0.321347	0.516819	0.243544	0.465717	-0.158592	0.147004	0.355866	0.0860464	0.0818145	0.788936	0.410163			0.362217	0.158249	0.353695	0.0110984	0.483535	0.545486	0.231835	0.181178	0.0265348	-0.0291134	0.264056	-0.232197	0.250333	0.0835466	0.239454	0.307482	0.0118944	0.372673	0.531016	0.0183883					0.494846	0.471638	-0.00876766	-0.283087	0.00153547	0.00401661
-0.0392323	0.0476278	-0.0924724	0.295975	-0.0219739	0.111247	-0.348198	0.33402	0.481207	0.274957	0.414194	-0.158592	0.140372	0.218084	0.0786191	0.0890247	0.753322	0.421005			0.336488	0.12997	0.441165	0.0102717	0.506097	0.556532	0.239653	0.155706	0.0394316	-0.027963	0.258351	-0.217166	0.254534	0.0894315	0.253171	0.326345	0.0129365	0.37243	0.524119	0.0168133					0.526777	0.465472	0.0140904	-0.286798	0.000842734	0.00360704
-0.0424942	0.0254999	-0.141482	0.328393	-0.0397919	0.111971	-0.325702	0.354473	0.474872	0.225146	0.410337	-0.158592	0.117923	0.493085	0.0952804	0.0904177	0.834846	0.432965			0.354169	0.160138	0.513624	0.00670907	0.517848	0.553316	0.156549	0.136681	0.0583398	-0.0162397	0.271466	-0.237349	0.246566	0.0735777	0.268568	0.353142	0.0105845	0.351422	0.521763	0.0159759					0.509161	0.462091	0.0215728	-0.28875	-0.00264779	0.00434744
-0.0394599	-0.0171846	-0.221436	0.345431	-0.0665669	0.104017	-0.316926	0.374664	0.505611	0.180209	0.340894	-0.158592	0.114928	0.794331	0.116463	0.0971593	0.814404	0.445778			0.338744	0.18769	0.604694	0.00916932	0.508404	0.545881	0.194366	0.263194	0.0601887	-0.00203909	0.250676	-0.23432	0.236095	0.0940337	0.266099	0.356575	0.0118238	0.326238	0.514662	0.0182139					0.540993	0.450632	0.0359958	-0.293728	-0.0036155	0.0055535
-0.0444434	0.0405932	-0.317829	0.340208	-0.0485163	0.0911438	-0.32351	0.397028	0.447441	0.209656	0.356918	-0.158592	0.104266	0.623122	0.112264	0.0949391	0.78071	0.45087			0.370017	0.181676	0.315859	0.00290006	0.500715	0.543501	0.173737	0.27758	-0.0865775	-0.00362267	0.198765	-0.234417	0.250551	0.116158	0.210578	0.378636	0.0181574	0.316612	0.508427	0.0197134					0.511956	0.457663	0.0664666	-0.293579	-0.00454069	0.00591384
-0.0459476	0.0191783	-0.337176	0.334402	-0.0376201	0.0804761	-0.308072	0.436036	0.517993	0.158377	0.348948	-0.158592	0.0798675	0.536443	0.0892058	0.0969652	1.01779	0.450214			0.43138	0.220234	0.203331	-0.00276903	0.518111	0.524705	0.207981	0.37709	-0.0444177	-0.00160571	0.191717	-0.237299	0.22682	0.108684	0.260146	0.383674	0.0276348	0.327575	0.503212	0.0208082					0.477373	0.441601	0.0899722	-0.288962	-0.00727841	0.00424603
-0.0540505	0.051899	-0.423026	0.313289	-0.0255493	0.0679499	-0.359356	0.47814	0.593486	0.0969281	0.355029	-0.158592	0.0694082	0.330014	0.122281	0.111216	1.20718	0.446123			0.427977	0.23037	0.19273	-0.00563458	0.534824	0.511159	0.275556	0.434627	-0.0464811	0.0105558	0.166339	-0.244629	0.221111	0.0885095	0.265673	0.398131	0.0389395	0.339313	0.496301	0.0215322					0.465639	0.436369	0.0965855	-0.246537	-0.00787967	0.00472749
-0.05724	0.0930794	-0.484534	0.283278	-0.00957217	0.062991	-0.360581	0.449271	0.546416	0.14513	0.421417	-0.158592	0.0830907	0.141787	0.120028	0.115106	1.14425	0.43656			0.5506	0.230559	0.286157	-0.00688567	0.5592	0.509701	0.287802	0.427636	-0.0769709	0.00422824	0.138079	-0.236305	0.225289	0.0680597	0.27474	0.407309	0.0386094	0.313181	0.490828	0.0223795					0.490685	0.433345	0.0929272	-0.205648	-0.00672068	0.00576393
-0.0509755	0.180718	-0.519492	0.260747	0.0112694	0.0576205	-0.380315	0.436534	0.504237	0.180594	0.426044	-0.158592	0.0591932	0.248775	0.109736	0.116353	1.17264	0.429398			0.627381	0.228626	0.349639	-0.0048184	0.531434	0.513421	0.35589	0.43463	-0.061189	0.00938746	0.116551	-0.22612	0.233841	0.0571184	0.305559	0.412366	0.034171	0.306635	0.484357	0.023552					0.483946	0.426184	0.0911446	-0.172352	-0.0099726	0.00600347
-0.0501403	0.210774	-0.585881	0.240159	0.0402453	0.0491501	-0.378705	0.443556	0.488459	0.131401	0.477792	-0.158592	0.0612661	0.211203	0.149442	0.110972	1.11116	0.411952			0.741369	0.256042	0.238585	-0.021409	0.520999	0.503127	0.420874	0.490905	-0.0962805	0.0188756	0.0908128	-0.223234	0.244611	0.0497612	0.307249	0.396491	0.0467884	0.282517	0.493716	0.0242253					0.477086	0.424285	0.0870909	-0.149197	-0.0112017	0.00632768
-0.0507996	0.253151	-0.620118	0.216026	0.0653622	0.0407182	-0.374219	0.452113	0.474238	0.165139	0.530467	-0.158592	0.0586564	0.00984957	0.15315	0.111921	0.921187	0.403355			0.738238	0.231308	0.23038	-0.0314303	0.521594	0.509541	0.59438	0.440576	-0.103351	0.02209	0.070345	-0.187492	0.232782	0.0504883	0.303929	0.39759	0.0617957	0.28351	0.488597	0.0239142					0.486171	0.417843	0.0967902	-0.123043	-0.0105116	0.00462834
-0.0597132	0.299249	-0.617583	0.202605	0.0991765	0.0375348	-0.344946	0.435661	0.442459	0.214288	0.59666	-0.158592	0.0618806	-0.152246	0.130266	0.110701	0.896499	0.38677			0.823288	0.195734	0.300669	-0.0256765	0.556859	0.509891	0.644931	0.336282	-0.0938967	0.0194018	0.0632037	-0.19723	0.236718	0.0177566	0.279985	0.386958	0.054931	0.286893	0.486184	0.0237131					0.474029	0.418303	0.0973077	-0.097546	-0.00940585	0.0025637
-0.068063	0.24421	-0.634432	0.205735	0.116456	0.0320139	-0.346607	0.453167	0.451154	0.207801	0.584582	-0.158592	0.0587189	-0.0652657	0.136804	0.126946	0.877523	0.37411			0.867106	0.181422	0.301748	-0.0221593	0.565711	0.498353	0.738422	0.197259	0.0722502	0.0182615	0.0815646	-0.179557	0.234763	0.0343484	0.279885	0.394305	0.0419819	0.272475	0.483014	0.0239113					0.496269	0.404158	0.0838199	-0.0837212	-0.00726401	0.00157163
-0.0727439	0.273779	-0.665623	0.203821	0.124365	0.0231624	-0.361167	0.452298	0.389497	0.25478	0.631854	-0.158592	0.0753167	-0.189209	0.137777	0.140573	0.831242	0.366005			0.878596	0.182878	0.202338	-0.0173458	0.577345	0.484024	0.751823	0.104995	0.0832921	0.0188804	0.0786982	-0.167342	0.243797	0.0776835	0.253531	0.38538	0.0297625	0.275434	0.482191	0.0221061					0.488145	0.398313	0.0796473	-0.0648454	-0.00692019	0.00133173
-0.0682662	0.267029	-0.661788	0.210758	0.139436	0.0484779	-0.310271	0.444391	0.343879	0.309835	0.598331	-0.158592	0.0798793	-0.0749694	0.101464	0.146063	0.764183	0.360579			0.95202	0.154342	0.166354	-0.0125411	0.578148	0.48244	0.761981	-0.0729964	0.106679	0.0234318	0.100793	-0.158772	0.235706	0.0834866	0.305428	0.366295	0.0181714	0.278594	0.49732	0.0212032					0.476848	0.400351	0.0845962	-0.0904776	-0.00709221	-0.000116421
-0.0682602	0.235547	-0.6538	0.222906	0.148141	0.0760218	-0.303133	0.454784	0.368598	0.30024	0.614607	-0.158592	0.0718545	-0.139096	0.135894	0.157491	0.950271	0.358566			0.905356	0.15789	0.0984744	-0.00448238	0.569932	0.480917	0.86392	-0.0464143	0.172987	0.021133	0.12378	-0.158022	0.235913	0.0725037	0.252433	0.367427	0.0107242	0.298059	0.497612	0.0193744					0.470877	0.412734	0.0844757	-0.107379	-0.00835641	0.000446078
-0.0614275	0.168628	-0.680224	0.217919	0.13654	0.102141	-0.271105	0.432516	0.349393	0.303037	0.624592	-0.158592	0.0875896	-0.259277	0.132923	0.175867	0.82008	0.357455			0.817859	0.171447	0.0616434	-0.0199601	0.57843	0.467557	0.953807	0.0416787	0.18736	0.0319874	0.142062	-0.160764	0.234276	0.0845613	0.223132	0.401493	0.0178692	0.325177	0.499618	0.0177169					0.436179	0.410699	0.0805373	-0.0994768	-0.00541509	0.00229297
-0.0550474	0.133867	-0.667887	0.207961	0.117132	0.134682	-0.250384	0.418821	0.377261	0.307589	0.630097	-0.158592	0.0860143	-0.247475	0.100551	0.182761	0.82025	0.360773			0.774028	0.150765	0.0701448	-0.0259114	0.609199	0.450325	0.953471	0.0451863	0.213966	0.0208527	0.157083	-0.142136	0.217351	0.0901882	0.227711	0.400684	0.00939926	0.336473	0.483265	0.02044					0.399428	0.402276	0.076434	-0.0784717	-0.00559562	0.00349836
-0.0503503	0.0972882	-0.679777	0.192487	0.0980969	0.168238	-0.274897	0.443275	0.390378	0.310566	0.626158	-0.158592	0.109083	-0.326235	0.0960534	0.211564	0.787314	0.359912			0.831658	0.189336	0.0454002	-0.0373069	0.616273	0.419558	0.848724	0.122866	0.281116	0.00932231	0.172082	-0.143572	0.225126	0.0949794	0.305214	0.424172	-0.00578998	0.344283	0.496852	0.021726					0.39776	0.388565	0.0754667	-0.0620784	-0.00422126	0.00511943
-0.024285	0.0536928	-0.703606	0.179213	0.0726346	0.200924	-0.261006	0.445821	0.371492	0.296959	0.624938	-0.158592	0.114284	-0.335799	0.119579	0.23847	0.740286	0.365663			0.821764	0.196227	-0.0632336	-0.0494218	0.600051	0.389829	0.742757	0.237699	0.350401	0.00715645	0.178369	-0.11416	0.22478	0.0755666	0.365388	0.452051	-0.0013605	0.352423	0.494618	0.0205827					0.390822	0.392517	0.0699759	-0.0498031	-0.00353072	0.0111904
-0.0251456	0.0297469	-0.702441	0.174048	0.0679507	0.241158	-0.261607	0.421954	0.38404	0.295998	0.637796	-0.158592	0.136577	-0.435401	0.133855	0.279903	0.721612	0.374343			0.766772	0.210515	-0.0982889	-0.0557921	0.61131	0.378937	0.565449	0.300731	0.385165	0.00499574	0.184889	-0.133581	0.218753	0.0963482	0.361759	0.44577	0.000155934	0.356101	0.496947	0.0196677					0.379226	0.384297	0.0651411	-0.0241993	-0.00267402	0.011992
-0.0125019	-0.00343625	-0.724943	0.168017	0.0664289	0.28656	-0.258776	0.404496	0.383524	0.253389	0.643792	-0.158592	0.143544	-0.373056	0.148965	0.338205	0.635912	0.379321			0.817878	0.176491	0.0776379	-0.0538451	0.585796	0.394618	0.408039	0.34674	0.193968	0.00802458	0.190343	-0.120967	0.204755	0.0511114	0.362478	0.458606	0.0116394	0.357228	0.506492	0.0192117					0.390213	0.376494	0.055595	-0.0128068	-0.000989954	0.0143756
-0.00889952	-0.0769912	-0.738899	0.1536	0.0535703	0.303966	-0.253536	0.397011	0.376419	0.235659	0.684622	-0.158592	0.141088	-0.469459	0.161392	0.396018	0.430456	0.39235			0.757258	0.191083	0.0751054	-0.0756179	0.631102	0.383675	0.249703	0.476384	0.227141	0.00801623	0.196889	-0.102939	0.204209	0.0496593	0.371161	0.470325	0.0238138	0.346153	0.48963	0.0178539					0.381677	0.36852	0.0462634	0.0136365	-0.00164234	0.0145217
-0.0188339	-0.0993308	-0.752924	0.137394	0.0434172	0.323942	-0.251727	0.392475	0.351248	0.230418	0.647108	-0.158592	0.147488	-0.358463	0.139358	0.436698	0.247091	0.40624			0.710261	0.182728	0.186034	-0.0741892	0.685624	0.36884	0.00616576	0.421619	0.287274	0.0130019	0.210705	-0.0939559	0.209278	0.066568	0.429164	0.47825	0.0165095	0.334831	0.50443	0.0172708					0.349814	0.34217	0.0425642	0.0316776	-0.00111151	0.0119641
-0.0393462	-0.150441	-0.755145	0.135007	0.044775	0.361036	-0.245337	0.410985	0.366311	0.232766	0.604763	-0.158592	0.14135	-0.349094	0.13204	0.440512	0.269785	0.410993			0.826562	0.194171	0.366541	-0.07089	0.728814	0.375434	-0.188531	0.291245	0.279376	0.00288676	0.237306	-0.0782355	0.213894	0.0541157	0.465803	0.432545	0.0111236	0.330581	0.518933	0.0175983					0.365963	0.330334	0.0357796	0.0261736	-0.00216487	0.00880746
-0.0453695	-0.186211	-0.763578	0.135076	0.0431604	0.381892	-0.269969	0.426414	0.364811	0.242227	0.590331	-0.158592	0.142383	-0.409186	0.14462	0.454417	0.308254	0.41756			0.861244	0.210285	0.383601	-0.051676	0.724627	0.367694	-0.37142	0.251438	0.296793	0.0049509	0.250001	-0.067838	0.228116	0.0685164	0.459077	0.495217	0.00695675	0.327641	0.53334	0.0145206					0.381092	0.32674	0.0203331	0.0171759	0.000507332	0.00789398
-0.0596565	-0.226876	-0.785037	0.143788	0.0380052	0.407005	-0.233762	0.414992	0.354017	0.190102	0.56654	-0.158592	0.138047	-0.280457	0.138173	0.449195	0.315116	0.416207			0.921378	0.188266	0.322067	-0.0437467	0.720227	0.372839	-0.482066	0.274756	0.2941	0.0137459	0.236325	-0.062723	0.217264	0.0474663	0.442822	0.487085	0.0203911	0.331176	0.517136	0.0111401					0.394347	0.317345	0.00665406	0.0294917	-0.00164444	0.0074181
-0.0791037	-0.265002	-0.791952	0.175834	0.0418376	0.43212	-0.216821	0.447323	0.381458	0.146144	0.515287	-0.158592	0.128054	-0.378916	0.126505	0.436703	0.350095	0.411567			1.03026	0.215324	0.266915	-0.0478227	0.706658	0.383938	-0.523845	0.274246	0.250275	0.0115385	0.243249	-0.0644705	0.218135	0.0830936	0.392706	0.490146	0.0188138	0.333815	0.527214	0.0130117					0.380169	0.299221	-0.0117355	0.0449523	-0.00101346	0.00134273
-0.0868278	-0.299275	-0.788919	0.18823	0.0384419	0.457153	-0.213201	0.468604	0.40526	0.107839	0.494846	-0.158592	0.126866	-0.29297	0.120533	0.411465	0.351291	0.394235			1.09221	0.209026	0.216364	-0.0509592	0.700432	0.39207	-0.442269	0.288986	0.243711	0.0234182	0.246132	-0.0273062	0.221008	0.0304136	0.365691	0.529693	0.0233827	0.353599	0.519185	0.00823231					0.371434	0.298215	-0.0269509	0.0706648	-0.00294556	0.00168083
-0.0976296	-0.311163	-0.779595	0.204891	0.0379839	0.467406	-0.191198	0.489213	0.423972	0.103443	0.483436	-0.158592	0.130734	-0.322328	0.120791	0.346307	0.222926	0.376079			1.00445	0.248566	0.0852919	-0.0722253	0.745409	0.389371	-0.341367	0.37578	0.433379	0.0335737	0.239424	-0.0079731	0.236391	0.0364251	0.402477	0.578258	0.0214528	0.362977	0.520154	0.0080515					0.367095	0.299153	-0.0485037	0.0793222	-0.00455157	-0.000591972
-0.113065	-0.296948	-0.772023	0.219014	0.0379391	0.491893	-0.188779	0.500103	0.421089	0.103215	0.498323	-0.158592	0.137053	-0.311753	0.121349	0.279267	0.363507	0.350223			1.07366	0.253907	0.23121	-0.064471	0.722943	0.399378	-0.170886	0.241452	0.44832	0.0211542	0.235421	0.00805199	0.239176	0.0385588	0.404251	0.602902	0.0247591	0.384124	0.519474	0.0111218					0.356706	0.300426	-0.0704686	0.0888052	-0.00326074	0.000929076
-0.108962	-0.309636	-0.762362	0.258488	0.0369145	0.508319	-0.193267	0.497474	0.470013	0.114685	0.504734	-0.158592	0.142473	-0.440872	0.117369	0.227223	0.45856	0.317628			1.20071	0.274011	0.192721	-0.068021	0.688615	0.413303	0.0382695	0.306622	0.240967	0.0269689	0.219102	0.0294483	0.226322	0.0450077	0.387585	0.620974	0.0311129	0.403996	0.514719	0.0128136					0.344168	0.29771	-0.0999578	0.101672	-0.00316316	0.00576564
-0.106751	-0.283936	-0.749698	0.288409	0.036727	0.507128	-0.192658	0.498531	0.458022	0.11795	0.477707	-0.158592	0.149758	-0.461978	0.137041	0.202157	0.347259	0.302228			1.1024	0.269745	0.0401665	-0.0616533	0.655301	0.39625	0.24803	0.407653	0.303974	0.0236387	0.196332	0.0456123	0.215301	0.0513251	0.345736	0.695932	0.0306323	0.407661	0.512179	0.0117856					0.321187	0.30792	-0.123757	0.117351	-0.00133475	0.00696722
-0.117114	-0.251095	-0.731569	0.293347	0.0425323	0.471867	-0.175194	0.490054	0.417034	0.158566	0.480465	-0.158592	0.159521	-0.331466	0.132876	0.168217	0.306012	0.282853			1.11298	0.271181	0.0281752	-0.0598366	0.637536	0.398657	0.771444	0.320026	0.292434	0.0249191	0.173674	0.0494058	0.222241	0.0127129	0.320332	0.679767	0.0380654	0.414212	0.511266	0.0148864					0.288463	0.305252	-0.137334	0.149786	-0.00201705	0.00691646
-0.111051	-0.232019	-0.700298	0.316271	0.0542879	0.426325	-0.204267	0.457525	0.453088	0.167199	0.495788	-0.158592	0.170446	-0.481442	0.129652	0.13414	0.301262	0.270921			1.08027	0.312916	0.088791	-0.0726416	0.625886	0.304792	0.864152	0.311245	0.284483	0.0179427	0.172192	0.0561069	0.228565	0.0260826	0.302014	0.736415	0.038513	0.42138	0.524519	0.0173129					0.316656	0.306241	-0.163011	0.13331	9.70716e-05	0.00719236
-0.119911	-0.209715	-0.675886	0.325673	0.0618459	0.381777	-0.223859	0.424741	0.474795	0.166421	0.550547	-0.158592	0.178052	-0.442696	0.128128	0.116474	0.281681	0.257419			0.932121	0.357038	0.120333	-0.0582092	0.620323	0.312416	1.04666	0.275959	0.268573	0.0169315	0.159631	0.0664894	0.229133	0.0125466	0.341925	0.753336	0.0459231	0.420142	0.52453	0.013856					0.311255	0.301422	-0.174022	0.137481	-0.00134846	0.00695458
-0.113916	-0.187002	-0.660126	0.336971	0.0760516	0.332455	-0.227004	0.398853	0.452782	0.20711	0.561478	-0.158592	0.192142	-0.476076	0.124092	0.0844561	0.310958	0.254576			0.945212	0.352346	0.140876	-0.0481132	0.5942	0.305361	1.28119	0.327862	0.214208	0.0126657	0.14619	0.0630863	0.218247	0.0264427	0.392587	0.750652	0.0368097	0.40745	0.540985	0.0176577					0.333586	0.304594	-0.192006	0.138647	0.00196812	0.00659835
-0.116737	-0.161148	-0.651374	0.332172	0.0943734	0.29365	-0.222373	0.371936	0.435434	0.204177	0.554534	-0.158592	0.186085	-0.413702	0.118581	0.069894	0.326661	0.256041			0.983391	0.33186	0.135529	-0.0353518	0.563825	0.296359	1.48202	0.296006	0.168733	0.00873784	0.140583	0.0603328	0.216605	0.0456258	0.384003	0.734451	0.0425005	0.391311	0.521197	0.0178166					0.328092	0.303177	-0.203042	0.141873	0.00592912	0.00789163
-0.0976028	-0.142336	-0.637756	0.353384	0.0969933	0.23976	-0.202337	0.362225	0.501479	0.167263	0.546095	-0.158592	0.187099	-0.33444	0.114653	0.0567587	0.456952	0.26121			0.981672	0.377529	-0.0177323	-0.0313997	0.522433	0.283886	1.53795	0.282385	0.0972638	0.0214978	0.150448	0.0552994	0.221001	0.0330176	0.346964	0.753421	0.0357336	0.37596	0.529639	0.0137124					0.292385	0.287846	-0.215218	0.141293	0.00529258	0.00844087
-0.0925153	-0.12057	-0.620759	0.347868	0.0940176	0.192222	-0.186475	0.354996	0.472186	0.178909	0.563463	-0.158592	0.196039	-0.242229	0.116488	0.0468341	0.491087	0.269134			1.00041	0.376081	-0.0799833	-0.0300577	0.472176	0.268455	1.73873	0.203102	0.196128	0.00620834	0.157982	0.0626714	0.24018	0.0169143	0.338766	0.781376	0.044911	0.37652	0.526628	0.0131099					0.302565	0.285605	-0.232221	0.14437	0.00778269	0.00304162
-0.0878763	-0.111663	-0.599107	0.323017	0.0860112	0.153396	-0.184676	0.334618	0.542414	0.135224	0.619295	-0.158592	0.207617	-0.146932	0.0962803	0.038963	0.772059	0.273968			1.08146	0.383327	-0.0774427	-0.0313192	0.455518	0.192131	1.72523	0.167416	0.145464	0.00167185	0.1579	0.0609709	0.245621	0.0441248	0.34633	0.760892	0.0507549	0.364149	0.522415	0.0152967					0.305724	0.27166	-0.239189	0.156626	0.00748555	0.00202944
-0.0808309	-0.105514	-0.570931	0.344653	0.0741331	0.161597	-0.218454	0.317888	0.61645	0.120232	0.611781	-0.158592	0.202847	-0.13091	0.0935238	0.0330985	0.783803	0.281002			1.07688	0.387945	-0.0273238	-0.0476971	0.433642	0.12249	1.35385	0.211788	0.173179	0.00313114	0.167326	0.0720909	0.231427	0.0520161	0.371554	0.789478	0.0379838	0.38076	0.479408	0.0141142					0.317771	0.266969	-0.253418	0.132428	0.00821784	0.00425916
-0.0823369	-0.0714378	-0.538206	0.345874	0.0533767	0.180145	-0.174428	0.317377	0.609569	0.155098	0.613958	-0.158592	0.192314	-0.0199535	0.097207	0.0352054	0.802368	0.288792			1.05106	0.359862	0.024678	-0.0383567	0.417584	0.202684	1.64621	0.168374	0.146573	-0.000766662	0.171129	0.0959959	0.235525	0.0529772	0.339422	0.778835	0.024193	0.390677	0.475435	0.0144681					0.27066	0.257673	-0.247614	0.129043	0.00833139	0.00283557
-0.0814283	-0.059136	-0.501357	0.317482	0.0253233	0.190345	-0.163516	0.323434	0.63699	0.156013	0.576741	-0.158592	0.185161	-0.0198322	0.100647	0.0239441	0.800746	0.314364			1.03067	0.379147	0.190715	-0.0420015	0.422998	0.109558	1.46486	0.185441	0.196575	0.00482747	0.181851	0.0987712	0.228692	0.0859794	0.335556	0.761019	0.0154542	0.406806	0.474171	0.0149116					0.258076	0.254014	-0.250233	0.118533	0.0103949	0.00335994
-0.079481	-0.0412975	-0.460462	0.294993	-0.0129145	0.201079	-0.166234	0.32933	0.682207	0.116774	0.554331	-0.158592	0.165013	-0.0433436	0.103423	0.0199227	0.766022	0.337889			0.918977	0.412031	0.328987	-0.0505031	0.419028	0.108913	1.41201	0.100138	0.185189	-0.00014152	0.197551	0.109488	0.231297	0.0900283	0.345808	0.752693	0.0314349	0.416205	0.471862	0.0173855					0.283322	0.24455	-0.242053	0.0977417	0.0117296	0.00274881
-0.0772789	-0.0343709	-0.425858	0.278014	-0.0497829	0.215868	-0.191854	0.333202	0.693889	0.168284	0.532243	-0.158592	0.162302	-0.0567083	0.108012	0.0121473	0.868399	0.359282			0.895108	0.419674	0.299043	-0.0599799	0.402489	0.0287832	1.12683	0.135521	0.139485	-0.00287491	0.208721	0.110202	0.221944	0.0927067	0.302175	0.736888	0.0172924	0.420415	0.471782	0.0163162					0.273661	0.242788	-0.23016	0.117038	0.0104259	0.00145253
-0.0887835	-0.0316926	-0.391312	0.279796	-0.0728297	0.230417	-0.196871	0.320915	0.677106	0.211985	0.513503	-0.158592	0.164515	-0.11918	0.114869	0.00246656	0.749574	0.374129			0.91198	0.404224	0.34105	-0.0668701	0.395344	0.0231166	1.31846	0.121035	0.12051	-0.0104525	0.200684	0.12804	0.219993	0.0708554	0.304785	0.739391	0.0208701	0.437113	0.471998	0.0182173					0.290717	0.241614	-0.2095	0.110656	0.00964091	0.00163885
-0.0718013	-0.0275363	-0.367931	0.267682	-0.0855687	0.24135	-0.212007	0.317389	0.723414	0.19398	0.485063	-0.158592	0.157045	-0.16452	0.121864	-0.000303361	0.58587	0.394944			0.826549	0.394475	0.274271	-0.0739733	0.412719	0.011575	1.31946	0.165623	0.0838484	0.000128893	0.191277	0.120498	0.217106	0.061026	0.345497	0.747126	0.00416074	0.431913	0.472779	0.0188635					0.285438	0.244645	-0.188692	0.0978755	0.0094393	0.0033834
-0.0749178	-0.0194106	-0.361887	0.244628	-0.0932537	0.249425	-0.211277	0.321109	0.692557	0.246267	0.473643	-0.158592	0.13662	-0.222203	0.107766	-0.00328428	0.343882	0.41085			0.791394	0.378004	0.414661	-0.0839763	0.388962	0.00647156	1.14751	0.0152019	0.0722564	0.00997852	0.186498	0.131646	0.222719	0.0223154	0.385419	0.736515	0.00558999	0.444209	0.468283	0.0176622					0.270392	0.249168	-0.165932	0.0871515	0.0122087	0.00522498
-0.0804733	-0.0296849	-0.282274	0.222075	-0.0975289	0.251895	-0.198124	0.322123	0.661207	0.254372	0.483804	-0.158592	0.121216	-0.280745	0.0985173	-0.00599396	0.341502	0.436738			0.766818	0.410545	0.39499	-0.0739362	0.383894	0.0804957	1.201	0.0322012	0.0928329	-0.000380337	0.173574	0.143701	0.213862	0.0518237	0.416081	0.704657	-3.87958e-05	0.43485	0.504782	0.0160139					0.257462	0.247267	-0.137331	0.0954032	0.0136444	0.00299203
-0.0338578	-0.0319149	-0.307762	0.204271	-0.0933078	0.241381	-0.232315	0.318224	0.644232	0.220404	0.451997	-0.158592	0.102923	-0.344632	0.0793164	-0.00595149	0.310477	0.463118			0.672837	0.458929	0.357682	-0.0772986	0.384159	0.0750939	1.03553	0.0838538	0.149818	0.00220253	0.165095	0.125996	0.224858	0.032052	0.454799	0.661814	0.00200144	0.426831	0.50368	0.0181858					0.243631	0.252213	-0.118558	0.124752	0.0145408	0.00819564
-0.0333575	-0.0162535	-0.332702	0.208023	-0.0842458	0.247929	-0.232019	0.309978	0.612231	0.220033	0.450044	-0.158592	0.0933504	-0.273541	0.0576508	-0.00291418	0.307036	0.468409			0.767956	0.389629	0.177262	-0.0736072	0.384106	0.0741246	1.03198	0.0765517	0.118647	-0.00204191	0.175442	0.140218	0.22754	0.00658636	0.473836	0.658454	-0.00361919	0.420183	0.497251	0.0229141					0.240388	0.264167	-0.0892912	0.124986	0.0136269	0.00841017
0.00964466	-0.00869991	-0.27757	0.212311	-0.068975	0.256685	-0.279647	0.298543	0.604197	0.223118	0.444416	-0.158592	0.0711594	-0.264371	0.0395369	-0.00361474	0.308938	0.474328			0.841998	0.414	0.0125062	-0.0855826	0.387962	-0.00558872	0.865328	0.0707846	0.0317045	0.00140765	0.149593	0.13881	0.239253	0.0256965	0.476923	0.663599	-0.00962965	0.417082	0.493651	0.0218989					0.14454	0.259165	-0.0655038	0.167305	0.011362	0.0113029
0.000706567	0.00159538	-0.211974	0.214916	-0.0593191	0.266723	-0.294223	0.294811	0.592411	0.17985	0.450688	-0.158592	0.0367807	-0.268	0.017997	-0.001736	0.195436	0.488437			0.832841	0.472489	0.0916464	-0.0804429	0.385474	0.073754	1.17424	0.0560473	0.106322	0.00136812	0.13826	0.154557	0.245355	0.0124602	0.529956	0.696614	0.00938598	0.419931	0.505666	0.0228059					0.136274	0.253809	-0.0419021	0.145508	0.0118632	0.0140637
-0.00161866	0.0176215	-0.2268	0.173118	-0.0453001	0.270815	-0.335218	0.292002	0.562578	0.208473	0.446706	-0.158592	0.00092124	-0.169162	-0.00436124	-1.44976e-06	0.0535469	0.494609			0.758085	0.450947	0.180716	-0.0838588	0.391687	0.0837618	1.18157	0.130118	0.191318	-0.00477491	0.135401	0.157681	0.252445	0.0392399	0.572137	0.692631	-0.00203276	0.41703	0.504899	0.025847					0.126069	0.257072	-0.021331	0.139288	0.0135452	0.0130963
-0.0271612	0.0312453	-0.241197	0.159498	-0.0376579	0.275028	-0.333049	0.28775	0.511921	0.263297	0.460638	-0.158592	-0.0478179	-0.182173	-0.0273095	-0.00223892	0.0424331	0.490204			0.790365	0.457251	0.274871	-0.0914246	0.388825	0.0443966	0.85251	0.118525	0.243831	-0.00615899	0.117763	0.161524	0.25404	0.0682354	0.575365	0.650114	0.00729407	0.417543	0.500045	0.0265767					0.118487	0.258752	0.0069235	0.139604	0.0121606	0.0109292
-0.0221685	0.0566072	-0.253316	0.174684	-0.025649	0.278842	-0.375204	0.278108	0.509671	0.293107	0.452239	0.228351	-0.0645371	-0.170251	-0.0298856	-0.00736404	0.0043572	0.481329			0.80014	0.482021	0.248993	-0.0933697	0.401669	0.134487	1.12734	0.195387	0.247878	-0.00602601	0.116192	0.154559	0.246068	0.0941632	0.572194	0.646071	-0.00104183	0.41689	0.498417	0.0240702					0.146193	0.248112	0.0223655	0.131779	0.00843946	0.00920508
-0.0228948	0.0901287	-0.333601	0.178917	-0.0194293	0.293825	-0.353976	0.265768	0.515899	0.278588	0.432918	0.282315	-0.0825586	-0.051002	-0.0297677	-0.00723991	-0.0151999	0.469797			0.695491	0.516085	0.325974	-0.10173	0.414945	0.0613442	1.01329	0.228823	0.215695	-0.006429	0.101465	0.141329	0.263239	0.0759094	0.52754	0.642705	0.00718846	0.414795	0.496649	0.0238964					0.144573	0.249998	0.038147	0.13017	0.00658826	0.0105718
-0.078654	0.0954088	-0.229538	0.184541	-0.00911459	0.312505	-0.311683	0.258805	0.553418	0.298914	0.461831	0.347011	-0.0891947	-0.0212975	-0.0290957	-0.00978862	-0.0122914	0.451184			0.782831	0.513375	0.346615	-0.105647	0.421074	-0.00483167	0.821497	0.137738	0.251793	-0.00563384	0.0936192	0.176754	0.252503	0.0823884	0.523016	0.616033	0.0103935	0.4136	0.495547	0.021782					0.128313	0.249029	0.0612736	0.110484	0.00571321	0.00626154
-0.0799161	0.103408	-0.136104	0.188301	-0.00144203	0.330331	-0.315049	0.268292	0.574355	0.399573	0.501539	0.366936	-0.0953722	-0.0601808	-0.024823	-0.0109948	-0.0195483	0.445553			0.692461	0.542882	0.481211	-0.11913	0.409964	-0.0111626	0.852166	0.0695269	0.263674	-0.00293343	0.0847786	0.184884	0.252848	0.0864195	0.528128	0.640452	0.0179602	0.41996	0.501079	0.0169282					0.118854	0.245131	0.0684112	0.120923	9.41302e-05	0.00552768
-0.129139	0.115145	-0.107379	0.19013	-0.00200506	0.335636	-0.274866	0.263709	0.572321	0.420528	0.484984	0.425493	-0.0934133	-0.0770632	-0.0250835	-0.0130061	-0.0339503	0.44178			0.725178	0.500225	0.64466	-0.11996	0.40486	-0.0160085	0.795404	0.0912114	0.427935	0.00348301	0.0951118	0.183074	0.242597	0.0703863	0.527224	0.620757	0.0268175	0.421222	0.505937	0.0166676					0.130415	0.241827	0.0751195	0.0740392	-0.00296943	0.00292013
-0.128783	0.125005	-0.087951	0.202929	-0.00276446	0.342872	-0.263923	0.247867	0.558686	0.532056	0.486793	0.39898	-0.0878338	-0.0813044	-0.0252019	-0.0128686	-0.0144807	0.4279			0.750195	0.478482	0.66292	-0.118479	0.391264	-0.0951664	0.526143	0.130557	0.462606	-0.00330607	0.0981139	0.189362	0.233283	0.0677701	0.540136	0.547702	0.0199592	0.434523	0.505982	0.0165081					0.121528	0.236722	0.0791935	0.0625676	-0.00411218	0.000386916
-0.133626	0.134263	-0.0882917	0.219217	-0.00764813	0.359378	-0.226481	0.239897	0.568464	0.493775	0.466496	0.464299	-0.0945011	-0.160503	0.0083323	-0.0134043	-0.0209316	0.43213			0.79179	0.513027	0.67131	-0.0989017	0.368644	-0.172371	0.179849	0.254863	0.425898	0.0121676	0.0799929	0.202365	0.219043	0.0718784	0.541814	0.54308	0.0285114	0.425796	0.501828	0.013333					0.108037	0.239155	0.0812718	0.0593617	-0.0064678	-0.00187048
-0.0900525	0.135997	-0.0890657	0.21939	-0.00619326	0.359193	-0.215118	0.233591	0.551841	0.502412	0.464428	0.444573	-0.081843	-0.190886	0.0281136	-0.0131343	-0.014747	0.437942			0.784102	0.547851	0.679194	-0.0945014	0.349314	-0.19913	0.24205	0.417178	0.383856	0.014051	0.127836	0.209115	0.208712	0.0622747	0.475659	0.546911	0.0340898	0.421642	0.50053	0.00957998					0.105732	0.232527	0.0866471	0.0488133	-0.00772874	-0.00232853
-0.0912714	0.0844902	-0.0252695	0.221982	-0.00721758	0.36392	-0.187414	0.225152	0.526767	0.516413	0.460665	0.432666	-0.0821106	-0.154669	0.0559731	-0.00843425	-0.0264411	0.449823			0.789298	0.600876	0.706832	-0.0880162	0.36173	-0.285773	0.0063018	0.388251	0.351277	0.0199402	0.11996	0.211842	0.203229	0.0514613	0.48879	0.546197	0.033161	0.414498	0.501357	0.00960764					0.0565996	0.239431	0.0911179	0.0546893	-0.00895416	-0.00213456
-0.0913478	0.0876265	-0.0228451	0.214644	-0.00193136	0.359865	-0.210056	0.222318	0.500011	0.519503	0.449332	0.436817	-0.0834393	-0.150292	0.0732823	-0.00533761	-0.0339542	0.451717			0.790231	0.598267	0.66923	-0.0900306	0.357172	-0.294251	0.0532213	0.23541	0.230127	0.0404744	0.121759	0.232977	0.188353	0.0684417	0.499226	0.546301	0.0311047	0.416747	0.501844	0.0090777					0.0343818	0.231447	0.0933738	0.0489669	-0.0108503	-0.00178578
-0.0877746	0.101356	-0.0936887	0.198867	-0.00766809	0.358446	-0.247759	0.218607	0.449781	0.600611	0.420506	0.416428	-0.0783068	-0.218847	0.0686437	-0.00603393	-0.042724	0.460068			0.722489	0.583032	0.697626	-0.0862144	0.365913	-0.277934	0.0363845	0.199276	0.186392	0.0467435	0.148351	0.223295	0.173339	0.101922	0.479208	0.564217	0.0263866	0.418312	0.498921	0.00837753					0.0423844	0.227914	0.0856999	0.0578386	-0.0135235	-0.00172046
-0.0910571	0.126097	-0.151133	0.184023	-0.0135828	0.337442	-0.250436	0.180196	0.406932	0.539252	0.379044	0.434172	-0.0642211	-0.114184	0.0617479	-0.00871709	-0.0286134	0.460062			0.822195	0.58911	0.823462	-0.0642201	0.374883	-0.269004	0.0669965	0.184365	0.0699609	0.0461984	0.131517	0.217386	0.16466	0.108814	0.478913	0.54148	0.0194734	0.403875	0.49575	0.0111811					0.0386095	0.216909	0.0880471	0.036239	-0.0108063	-0.00109557
-0.0871474	0.130871	-0.23173	0.171059	-0.0213851	0.336713	-0.228403	0.173726	0.385819	0.542684	0.427411	0.410334	-0.0292296	-0.108878	0.0889513	-0.00825202	-0.000802258	0.458597			0.805653	0.62303	0.758854	-0.0439111	0.3678	-0.266147	0.095988	0.164109	0.0169728	0.0269917	0.125212	0.234024	0.160622	0.1018	0.477195	0.534182	0.0207635	0.383786	0.489482	0.0113488					0.015292	0.219838	0.09093	0.0427286	-0.0130942	-0.00106108
-0.0806084	0.14078	-0.312744	0.159416	-0.0148702	0.319203	-0.223986	0.155468	0.425421	0.44835	0.415447	0.465442	0.00848506	-0.0213848	0.116122	-0.0026604	-0.0405308	0.458435			0.820277	0.615979	0.778582	-0.046412	0.397028	-0.273349	0.102045	-0.0421443	-0.11954	0.0286955	0.11659	0.235556	0.154635	0.131648	0.424264	0.577404	0.0118283	0.356618	0.485896	0.0117349					0.00738688	0.220909	0.095985	0.036294	-0.0143393	0.000891029
-0.0749295	0.148743	-0.204403	0.14811	-0.00800508	0.300615	-0.28398	0.152153	0.388959	0.518217	0.469227	0.477708	0.06326	-0.0226882	0.102076	8.79559e-05	-0.0269521	0.447227			0.81612	0.608565	0.71409	-0.0540207	0.406528	-0.279935	0.147689	-0.182274	-0.120107	0.0241742	0.118	0.222188	0.149561	0.146948	0.365875	0.562354	0.018648	0.33283	0.483762	0.0130966					0.0354084	0.208273	0.101991	0.0242888	-0.0160247	0.00102963
-0.112519	0.164383	-0.0875775	0.140116	-0.000642116	0.300608	-0.297938	0.152428	0.394968	0.510729	0.503354	0.447567	0.0665146	0.0380666	0.106255	0.00303655	-0.0310661	0.43792			0.710146	0.59357	0.639986	-0.0409324	0.426696	-0.277501	0.0703375	-0.325828	-0.0928172	0.028993	0.0704276	0.220606	0.148812	0.157775	0.414379	0.568828	0.0060897	0.307013	0.485096	0.0151759					0.0122642	0.204536	0.104371	0.0364957	-0.0171622	0.00167551
-0.118047	0.235088	-0.122631	0.131637	0.00383067	0.297189	-0.274902	0.159	0.399095	0.503163	0.489859	0.471191	0.0588109	0.00421217	0.129201	0.0010047	-0.0160506	0.425731			0.684112	0.544884	0.569582	-0.0405516	0.424026	-0.27307	0.00699873	-0.244522	-0.108753	0.0171312	0.0615432	0.232975	0.152289	0.170579	0.36804	0.547203	0.0138447	0.281674	0.483282	0.0160036					0.00269791	0.197499	0.108953	-0.0113679	-0.0172209	0.00136897
-0.0736549	0.247878	-0.102051	0.0920337	0.00399405	0.289981	-0.261502	0.157783	0.364921	0.568292	0.534083	0.477823	0.109811	-0.0952294	0.128489	-0.00172844	-0.0415152	0.421589			0.729352	0.552167	0.502564	-0.0219973	0.413027	-0.253068	-0.114606	-0.117339	-0.039592	0.00735832	0.0624428	0.224445	0.168967	0.177081	0.356447	0.530455	0.0164241	0.254044	0.480417	0.019127					0.00806372	0.197716	0.111694	-0.0113517	-0.0198759	0.00354782
-0.0698171	0.265716	-0.00855383	0.0839561	0.00926072	0.284543	-0.240696	0.153984	0.399257	0.49182	0.576213	0.563668	0.0971077	-0.0208205	0.127514	-0.00515141	0.019536	0.415772			0.808274	0.540172	0.516104	-0.0227482	0.404408	-0.255523	-0.128231	-0.0889443	-0.114373	-0.00412649	0.0266203	0.211188	0.180639	0.149338	0.340122	0.532047	0.0215878	0.224437	0.478631	0.0221502					-0.00379103	0.193082	0.12571	-0.0317303	-0.021951	0.0036541
-0.0575676	0.2627	-0.0172959	0.0775169	0.0170973	0.293069	-0.28157	0.172309	0.436877	0.486911	0.60752	0.603545	0.0574458	-0.142459	0.148662	-0.00428491	-0.00150884	0.412652			0.791023	0.526615	0.333269	-0.0195098	0.389894	-0.249057	-0.222577	-0.0814858	0.0431243	-0.00417524	0.00708207	0.220877	0.18944	0.140433	0.329574	0.5453	0.0237021	0.202478	0.474586	0.0223169					-0.0122999	0.191453	0.13202	-0.0220101	-0.0277815	0.00666194
-0.0565469	0.278915	-0.0227773	0.0739737	0.0293151	0.296606	-0.268993	0.169111	0.414812	0.549888	0.569321	0.614491	0.00153948	-0.212274	0.114502	-0.0112427	-0.00925282	0.415771			0.790708	0.554963	0.34022	-0.0266093	0.391517	-0.249856	-0.239328	-0.143343	0.120412	0.019755	0.00681455	0.208486	0.196665	0.162619	0.334343	0.548134	0.019165	0.179802	0.471478	0.0218394					0.00973124	0.183216	0.138655	-0.0404113	-0.0298073	0.00634674
-0.0549467	0.287585	-0.0231188	0.0648733	0.0316189	0.298872	-0.255387	0.192514	0.382323	0.560459	0.621652	0.628763	-0.0433922	-0.17486	0.112102	-0.0227372	0.0100363	0.408913			0.692213	0.547777	0.423341	-0.0186872	0.39601	-0.259694	-0.285854	-0.0894724	0.117287	0.0282955	0.00375509	0.197089	0.209468	0.117497	0.368645	0.555899	0.0166951	0.150452	0.466124	0.0221438					-0.0113948	0.179848	0.13966	-0.0211084	-0.0342637	0.0049155
-0.0624345	0.293456	-0.0383804	0.0614165	0.032855	0.301037	-0.177024	0.169026	0.426943	0.493927	0.622026	0.63029	-0.0962136	-0.162507	0.103474	-0.0306269	-0.00823633	0.410434			0.64333	0.550245	0.400944	-0.0133316	0.415689	-0.255931	-0.371134	-0.0757225	0.0529301	0.0310597	-0.00354453	0.191033	0.211814	0.1001	0.425602	0.559001	0.0120903	0.145855	0.463564	0.0223624					-0.041744	0.188652	0.148469	-0.0365439	-0.0372127	0.0105354
-0.065902	0.298899	-0.0525104	0.0303826	0.0301413	0.289692	-0.136153	0.178341	0.421565	0.436611	0.629748	0.639948	-0.103252	-0.00682207	0.0917948	-0.030845	-0.010708	0.411444			0.770301	0.588809	0.473759	-0.0137005	0.41985	-0.258541	-0.360686	-0.142919	0.194689	0.0270587	-0.00980145	0.196259	0.205323	0.0861453	0.453684	0.560949	0.0416163	0.131775	0.459071	0.022757					-0.0349658	0.18193	0.15672	-0.0786198	-0.039917	0.0111593
-0.0710813	0.291383	0.00501023	0.0233364	0.0297405	0.289574	-0.132727	0.180952	0.424932	0.385022	0.678136	0.665122	-0.0967405	-0.0248093	0.0472606	-0.0263291	0.020322	0.410065			0.798949	0.615786	0.485237	-0.000197767	0.39504	-0.263218	-0.302009	-0.046461	0.138206	0.0384272	-0.0198171	0.188757	0.21346	0.0915366	0.498726	0.573421	0.0533518	0.119907	0.457128	0.0244301					-0.0206744	0.173689	0.163927	-0.0778549	-0.0449565	0.0114548
-0.111514	0.287029	0.0523699	0.047391	0.030226	0.287456	-0.106216	0.161416	0.464463	0.316934	0.673568	0.638521	-0.160747	-0.0305206	0.0390178	-0.022681	0.114852	0.410466			0.795532	0.568828	0.525429	-0.00655606	0.402589	-0.281743	-0.214974	-0.112823	0.0648063	0.0349984	-0.0244848	0.186303	0.193291	0.081141	0.542713	0.571557	0.0598201	0.121806	0.457296	0.0234028					-0.0199817	0.170387	0.175916	-0.0726265	-0.0468365	0.00856004
-0.102094	0.279484	0.0116362	0.0531056	0.0306067	0.296314	-0.0726449	0.147649	0.440537	0.372243	0.650726	0.543717	-0.161568	0.173498	0.0516167	-0.0159374	0.0619416	0.408543			0.784363	0.606822	0.513957	0.00217177	0.400457	-0.290591	-0.103637	-0.137579	0.149209	0.0394071	-0.0290156	0.205408	0.198905	0.116017	0.577497	0.562308	0.0665034	0.127517	0.458464	0.020833					-0.0177101	0.162315	0.177661	-0.0621693	-0.0509842	0.00874818
-0.105189	0.222949	0.0944555	0.0495227	0.032021	0.293699	-0.0229232	0.139345	0.411287	0.365719	0.656612	0.542872	-0.16981	0.161594	0.0438642	-0.0102127	0.0723288	0.409604			0.747984	0.648986	0.53532	-0.00716481	0.400918	-0.303789	0.0386204	-0.109989	0.120171	0.0372023	0.00512272	0.19068	0.197144	0.106927	0.543134	0.547576	0.0629388	0.127411	0.456885	0.0183377					-0.0271825	0.158074	0.187797	-0.0990012	-0.0486095	0.00724333
-0.102564	0.228063	0.0885478	0.0350662	0.034948	0.282533	-0.0254467	0.154627	0.431156	0.354024	0.708762	0.53099	-0.155382	0.208967	0.0630268	0.000166892	0.176606	0.405291			0.76844	0.633809	0.499121	-0.00851324	0.405657	-0.306537	0.1379	-0.0428515	-0.0755049	0.0252283	-0.00544055	0.192291	0.197495	0.0972274	0.540813	0.518607	0.0512303	0.129979	0.451991	0.018781					-0.0375892	0.159553	0.196234	-0.125428	-0.0486871	0.00931512
-0.106981	0.224337	0.155057	0.0137193	0.0381691	0.288321	0.0114291	0.149374	0.433528	0.350761	0.676253	0.558403	-0.142633	0.0874614	0.0482838	0.00766249	0.191373	0.412017			0.800918	0.626314	0.483345	-0.00706848	0.36837	-0.294534	0.351376	-0.0174294	0.149487	0.0193698	-0.0239216	0.193999	0.198366	0.114621	0.555356	0.502292	0.0612564	0.151526	0.451455	0.0174617					-0.0221436	0.162788	0.210594	-0.147305	-0.0461137	0.0108179
-0.0988567	0.212651	0.135803	-0.0049683	0.0401611	0.289755	0.0248227	0.170444	0.402379	0.336522	0.64517	0.57271	-0.144236	0.0746467	0.0436385	0.0197327	0.19992	0.414207			0.813627	0.659912	0.482917	-0.000657442	0.335356	-0.298133	0.470537	-0.0953392	0.117338	0.00521124	-0.0229543	0.197342	0.204566	0.128531	0.528328	0.445458	0.0621419	0.160575	0.448166	0.0169763					-0.0231176	0.154416	0.222137	-0.121735	-0.0486921	0.00644815
-0.092453	0.208084	0.115256	-0.000873504	0.0462807	0.307699	0.0386843	0.157392	0.4603	0.326808	0.592794	0.62723	-0.140679	-0.0152287	0.0360822	0.0223007	0.21122	0.414225			0.708357	0.648169	0.521972	0.00177207	0.319704	-0.300957	0.50101	-0.0481895	0.0746094	-0.00334727	-0.0342922	0.197785	0.215414	0.14303	0.515312	0.424723	0.0342855	0.179442	0.423044	0.0172424					-0.0338714	0.15505	0.220391	-0.106703	-0.0512478	0.00673268
-0.0790385	0.213043	0.107757	-0.0174376	0.0480355	0.308077	0.0411611	0.154616	0.458591	0.304507	0.590327	0.598234	-0.141127	0.0992023	0.0395254	0.0240703	0.157753	0.41769			0.663616	0.663578	0.548314	-0.0103853	0.318954	-0.291035	0.558471	-0.218838	0.0959287	-0.00948556	-0.028391	0.198354	0.202033	0.12267	0.471208	0.400918	0.0116621	0.196332	0.415995	0.0150979					-0.0382449	0.163287	0.221518	-0.0853392	-0.0517308	0.00708482
-0.0805437	0.166212	0.123001	-0.0350897	0.0467378	0.307423	0.0539876	0.189834	0.427035	0.299684	0.559043	0.659013	-0.131293	0.156377	0.0304028	0.0267517	0.184724	0.413216			0.701229	0.659067	0.550729	-0.0130217	0.314126	-0.286796	0.56759	-0.134355	0.132579	0.00136264	-0.0379489	0.196722	0.216546	0.151299	0.460824	0.345181	-0.00419163	0.182322	0.405254	0.0141701					-0.046463	0.17056	0.22168	-0.109248	-0.0480204	0.00716044
-0.0840003	0.183736	0.115476	-0.0531368	0.0473151	0.297173	0.0939322	0.231325	0.466059	0.239394	0.58088	0.660154	-0.0883942	-0.0802579	0.0317306	0.0264514	0.185227	0.411288			0.676672	0.659115	0.532888	-0.000776101	0.317022	-0.280384	0.609937	-0.145	0.00930899	0.00522587	-0.0434058	0.191081	0.204859	0.122823	0.473358	0.348594	-0.0202803	0.178845	0.396428	0.0157853					-0.0474348	0.184445	0.227253	-0.124331	-0.0471041	0.00624774
-0.0868164	0.24893	0.0867079	-0.0632574	0.0495217	0.302663	0.155621	0.259822	0.445642	0.289332	0.541143	0.606039	-0.0688244	-0.0783585	0.0265473	0.0160959	0.263358	0.403281			0.71766	0.639836	0.574698	0.00441465	0.310905	-0.253175	0.567527	-0.117236	-0.0823121	0.00756533	-0.0817083	0.209346	0.218611	0.134501	0.526477	0.329483	-0.0152542	0.179774	0.389646	0.0170019					-0.0461975	0.188005	0.231165	-0.0929127	-0.0482868	0.00674541
-0.0893713	0.18122	0.170074	-0.0640217	0.052292	0.296836	0.199927	0.264618	0.445787	0.227555	0.49949	0.639248	-0.0754579	-0.0295172	0.0227399	0.0159632	0.153508	0.397908			0.711474	0.668038	0.549767	0.0129649	0.298806	-0.227527	0.532008	-0.113892	0.16399	0.012462	-0.0961915	0.209801	0.232485	0.119947	0.497369	0.330894	-0.00494547	0.190647	0.399381	0.0167181					-0.04869	0.194647	0.236496	-0.0788749	-0.047084	0.00634422
-0.0884929	0.181113	0.149138	-0.0617966	0.0615754	0.288026	0.220514	0.279983	0.455481	0.225309	0.51854	0.600328	-0.087618	0.0148595	0.021643	0.0179876	0.236054	0.389083			0.723382	0.716951	0.448896	0.0122598	0.307981	-0.208964	0.354191	-0.183862	-0.0716041	0.0155548	-0.0944225	0.197747	0.225485	0.120777	0.446081	0.301626	-0.00739434	0.169821	0.408802	0.0174476					-0.0616233	0.19314	0.227257	-0.104113	-0.0509839	0.00923114
-0.0850821	0.189588	0.142918	-0.0536335	0.0736318	0.276516	0.206314	0.300921	0.469072	0.287577	0.54878	0.557423	-0.0893801	0.0202381	0.0214967	0.0157907	0.246061	0.379711			0.784297	0.681115	0.495034	0.0145795	0.31877	-0.203066	0.320716	-0.136416	-0.0715001	0.0235948	-0.0949033	0.197295	0.230993	0.0859251	0.486059	0.310874	0.00237422	0.162509	0.400956	0.0144182					-0.0654416	0.186172	0.215167	-0.0816453	-0.0469071	0.00749354
-0.0843521	0.18665	0.12389	-0.0559539	0.0793652	0.260024	0.175544	0.298217	0.428334	0.286329	0.538435	0.506978	-0.0927702	-0.0478676	0.0167697	0.0118974	0.338553	0.378418			0.838948	0.681723	0.41422	0.020877	0.316569	-0.203318	0.407492	-0.175584	-0.110906	0.0308512	-0.084441	0.194155	0.229679	0.0945014	0.45241	0.286405	0.0107855	0.14709	0.429862	0.0143049					-0.0739808	0.192277	0.213906	-0.0656424	-0.0442098	0.0065
-0.0910305	0.130875	0.145248	-0.0487868	0.0872606	0.251227	0.184187	0.315799	0.436833	0.295949	0.530754	0.511011	-0.10279	-0.199783	0.0119581	0.00513379	0.366306	0.370079			0.881927	0.681634	0.378022	0.0304452	0.323094	-0.212118	0.42922	-0.164845	-0.0120093	0.0259129	-0.0906093	0.210712	0.230247	0.0981934	0.502102	0.273602	0.0163772	0.130558	0.426092	0.0142269					-0.0840346	0.182433	0.213217	-0.0643291	-0.0404684	0.00748003
-0.0995583	0.181896	0.105386	-0.0488351	0.0981237	0.256774	0.1746	0.339007	0.47396	0.301888	0.554069	0.464526	-0.0976501	-0.233801	0.015252	0.00176095	0.248035	0.365267			0.910974	0.71688	0.448604	0.0320238	0.309619	-0.196537	0.449642	-0.0944684	0.144769	0.0156904	-0.0946797	0.209915	0.233699	0.0766304	0.513578	0.251015	0.0213155	0.132842	0.439966	0.014364					-0.0843998	0.170758	0.208888	-0.0802975	-0.0415874	0.00592545
-0.100314	0.123833	0.126072	-0.0496381	0.110103	0.250638	0.133673	0.340887	0.461783	0.30328	0.528758	0.466065	-0.0930386	-0.221796	0.0169142	0.00409384	0.249846	0.364166			0.933978	0.71478	0.454226	0.0337432	0.29417	-0.195594	0.736543	-0.0514617	0.133153	0.00703197	-0.103088	0.201841	0.234489	0.0914123	0.520223	0.233033	0.030776	0.130657	0.448122	0.0145946					-0.102126	0.160934	0.204134	-0.0757322	-0.0368252	0.0093412
-0.094156	0.0557302	0.132423	-0.0521878	0.115203	0.236252	0.0745737	0.347411	0.495228	0.302353	0.581275	0.524946	-0.0931889	-0.231834	0.0222345	0.0126855	0.228138	0.365133			0.944671	0.704956	0.485469	0.0366034	0.286765	-0.214036	0.752175	-0.127909	0.0805549	0.00438072	-0.105223	0.179707	0.223788	0.111295	0.45126	0.225618	0.0325729	0.129568	0.458032	0.014471					-0.0968318	0.158952	0.195818	-0.0811675	-0.0335104	0.00738224
-0.0829132	0.11522	0.0784957	-0.0551783	0.117604	0.236748	0.0418551	0.356582	0.525052	0.305236	0.615983	0.512923	-0.0914485	-0.20966	0.0216911	0.00980978	0.281164	0.365842			0.920834	0.633701	0.665906	0.0487288	0.262645	-0.226957	0.799657	-0.092973	-0.151581	0.000844812	-0.0878693	0.171379	0.212543	0.139232	0.506306	0.226383	0.0460158	0.12004	0.440081	0.0150677					-0.1047	0.145429	0.186962	-0.0602625	-0.0291008	0.00568612
-0.0783476	0.0699419	0.101375	-0.0649714	0.117664	0.241817	-0.0161951	0.387375	0.530747	0.298306	0.543647	0.481201	-0.0392334	-0.200595	0.0247453	0.00931659	0.186521	0.362681			0.935495	0.621319	0.752875	0.0604617	0.273078	-0.229688	0.827627	-0.0102259	-0.152595	0.000638669	-0.0866063	0.184879	0.213059	0.169618	0.583512	0.225245	0.0387513	0.122569	0.433591	0.0135755					-0.115577	0.140584	0.204855	-0.0246054	-0.0207931	0.00144981
-0.0788561	0.0333786	0.115901	-0.0730191	0.110853	0.242775	-0.0360197	0.401046	0.554453	0.295281	0.553515	0.442201	0.0176481	-0.177697	0.00996067	0.0118668	0.191953	0.362728			0.854305	0.630625	0.770507	0.0590206	0.283592	-0.20977	0.795639	0.00510162	-0.166055	0.00888851	-0.0888284	0.178141	0.199194	0.223581	0.613144	0.238967	0.0271574	0.119989	0.446317	0.018239					-0.112595	0.152744	0.208355	-0.0785653	-0.0109215	0.00709686
-0.0772311	-0.00208463	0.133253	-0.0550194	0.113297	0.242128	-0.0184318	0.446588	0.586604	0.292952	0.593685	0.45397	0.0696048	-0.164504	-0.00225225	0.0139286	0.0869037	0.360372			0.872039	0.624793	0.844263	0.0602467	0.29412	-0.191519	0.7806	0.084852	-0.327189	-0.00074721	-0.0989568	0.189292	0.200689	0.253393	0.610382	0.233128	0.0187699	0.130501	0.44094	0.019285					-0.0939642	0.149159	0.209145	-0.0845148	0.00269899	0.00773982
-0.0725568	0.00824926	0.112695	-0.0277339	0.110751	0.24514	-0.025135	0.465877	0.625925	0.28744	0.611168	0.462441	0.126797	-0.0826884	-0.0166513	0.0200235	0.0776586	0.365626			0.848594	0.594523	0.867546	0.0643197	0.281476	-0.167279	0.775091	0.12876	-0.235269	-0.00253361	-0.0904684	0.168138	0.206221	0.310286	0.571812	0.208486	0.0185363	0.138802	0.436193	0.0219928					-0.0885537	0.148367	0.218484	-0.102692	0.019558	0.00768681
-0.0574083	-0.0332675	0.130888	0.00931919	0.107572	0.243674	-0.0264738	0.437518	0.649549	0.2866	0.60413	0.473207	0.181111	-0.057938	-0.000737023	0.0223891	0.0744996	0.367794			0.821612	0.574805	0.817814	0.0769948	0.260833	-0.169084	0.777811	0.0207467	-0.408345	-0.00476722	-0.0762968	0.163284	0.189737	0.338561	0.534763	0.244848	0.0115295	0.150454	0.431092	0.0235605					-0.0877002	0.157328	0.223561	-0.110623	0.0427419	0.00840861
-0.0539061	0.0162196	0.126324	0.0485714	0.0986756	0.244444	-0.011323	0.455769	0.650138	0.283976	0.618102	0.452341	0.12653	-0.00297743	-0.0204948	0.0152446	0.0837394	0.364693			0.80081	0.546016	0.865911	0.0676862	0.255688	-0.177595	0.379154	-0.0485891	-0.410073	0.00850575	-0.0642448	0.173646	0.1863	0.349397	0.52862	0.223892	0.015017	0.155401	0.395341	0.0237386					-0.0727242	0.157575	0.221352	-0.0983595	0.0688237	0.0100537
-0.0572191	0.0144597	0.146046	0.0914304	0.0884143	0.248255	0.00532439	0.471635	0.660974	0.231038	0.637862	0.411851	0.178305	0.0513405	-0.0379043	0.0152311	0.0406614	0.365791			0.774334	0.539184	0.835616	0.0766389	0.253151	-0.177447	0.314025	-0.00771409	-0.355462	0.007462	-0.0652473	0.187443	0.180405	0.373233	0.591357	0.214956	0.0312581	0.16347	0.378983	0.0228626					-0.0752822	0.158614	0.223668	-0.087404	0.101171	0.0110872
-0.0643667	-0.0543786	0.206654	0.125214	0.0882514	0.25249	0.0121337	0.48527	0.615322	0.281591	0.662816	0.397466	0.232921	0.0408228	-0.0325047	0.0188627	-0.0268878	0.365714			0.815801	0.543598	0.775934	0.0641395	0.259518	-0.177126	0.248603	-0.0209088	-0.317486	0.0123733	-0.0779692	0.209145	0.183986	0.397664	0.570921	0.181651	0.0232921	0.167315	0.393895	0.0191598					-0.0238405	0.158579	0.227798	-0.0936576	0.137014	0.0104393
-0.0697583	-0.0504219	0.183662	0.173738	0.0885103	0.255778	0.0317498	0.4793	0.625655	0.28421	0.761993	0.422326	0.241399	0.071719	-0.0167519	0.0209264	-0.0327301	0.368202			0.786063	0.497273	0.772981	0.0622589	0.235877	-0.179458	0.225689	0.0310165	-0.11656	0.0036239	-0.0769083	0.190642	0.192142	0.362018	0.496758	0.142614	0.0258405	0.184599	0.380904	0.0175288					-0.0108892	0.156936	0.229786	-0.100768	0.173606	0.00995744
-0.064486	-0.0918494	0.193456	0.223252	0.0970671	0.263462	0.0448664	0.483467	0.657605	0.226855	0.762596	0.452809	0.180235	-0.0258275	-0.0112954	0.0199261	-0.0592384	0.371912			0.823122	0.494204	0.788257	0.0715778	0.214182	-0.196902	0.166185	0.0641636	0.0813653	-0.00980286	-0.0577381	0.183538	0.194742	0.354569	0.390008	0.11629	0.0377406	0.183108	0.363876	0.015486					-0.0185678	0.150154	0.232605	-0.0729843	0.208432	0.00582199
-0.0599998	-0.134074	0.214476	0.257386	0.0920448	0.26155	0.0529811	0.481634	0.659872	0.232418	0.792352	0.442642	0.179658	-0.0359893	0.0208346	0.0222129	0.0156956	0.377303			0.838482	0.500148	0.720494	0.0720886	0.190671	-0.205875	0.0565691	-0.00372333	0.268392	-0.000676586	-0.0480016	0.156065	0.188924	0.340054	0.431587	0.0976524	0.0439538	0.179612	0.367497	0.0112929					-0.0435836	0.144026	0.238403	-0.0668839	0.240874	0.00564441
-0.053	-0.169518	0.23579	0.27112	0.101386	0.267896	0.0578755	0.521017	0.627155	0.244572	0.820273	0.439295	0.178193	-0.0218455	0.0205895	0.0169637	0.00626469	0.379615			0.825782	0.510045	0.675452	0.0719503	0.178629	-0.241766	-0.0154934	0.0302016	0.222461	0.00779312	-0.0595249	0.152754	0.195565	0.318346	0.430674	0.0986603	0.048256	0.191934	0.384086	0.0100127					-0.0479329	0.142366	0.231354	-0.0390428	0.272066	0.00559413
-0.0554242	-0.122132	0.247213	0.276762	0.113899	0.272263	0.0599109	0.552467	0.6433	0.23395	0.830631	0.43456	0.168193	-0.0604426	0.00968221	0.0170917	0.0432811	0.38447			0.804302	0.515475	0.676198	0.0612221	0.188581	-0.271292	-0.0113635	0.0805887	0.461819	0.00812991	-0.0646074	0.144659	0.196354	0.386412	0.433074	0.0747623	0.0716545	0.197583	0.370158	0.00795364					-0.050806	0.131548	0.231849	-0.0388677	0.295553	0.0058469
-0.0587303	-0.185222	0.260968	0.276761	0.131968	0.288853	0.0276925	0.549261	0.663284	0.232599	0.841318	0.460921	0.157934	-0.1477	0.0367062	0.0253495	0.0484641	0.390831			0.831962	0.529918	0.403836	0.0684585	0.177641	-0.276808	0.139452	0.207419	0.636715	0.00468196	-0.0720198	0.15805	0.194089	0.396709	0.424043	0.053327	0.0682254	0.191713	0.40274	0.00451454					-0.0530367	0.127032	0.2357	-0.0485499	0.317916	0.00232621
-0.0587406	-0.200826	0.256799	0.277319	0.151686	0.290684	0.03169	0.580082	0.657559	0.2432	0.798242	0.44836	0.16393	-0.233139	0.0583949	0.0286594	0.0365686	0.392735			0.821107	0.538388	0.394226	0.0612201	0.175418	-0.289863	0.212259	0.333539	0.567718	0.00712597	-0.071982	0.145535	0.2037	0.365288	0.438458	0.0364277	0.0489222	0.193004	0.399371	0.00471253					-0.0724919	0.114245	0.243007	-0.0448034	0.335461	0.00171595
-0.0572547	-0.210091	0.246702	0.284781	0.12983	0.301901	0.0223397	0.611663	0.701721	0.193329	0.767238	0.439142	0.173467	-0.238665	0.0585976	0.029463	0.055072	0.395094			0.760641	0.568532	0.426036	0.0692035	0.194699	-0.297296	0.245499	0.281259	0.723675	0.00121526	-0.0629057	0.11363	0.185249	0.333018	0.434221	0.0305109	0.0233518	0.194816	0.392843	0.00908084					-0.141701	0.112494	0.239742	-0.0691656	0.34602	0.00828993
-0.0524834	-0.241547	0.269302	0.288181	0.102916	0.307085	0.0211577	0.614882	0.695501	0.198726	0.736533	0.466339	0.168001	-0.252286	0.0453781	0.0349558	0.121667	0.399797			0.741396	0.571979	0.379732	0.0678327	0.184669	-0.310195	0.350885	0.1387	0.755667	0.00820323	-0.0667273	0.121798	0.186204	0.353792	0.451716	0.0429669	0.0202191	0.194973	0.407986	0.0100164					-0.140464	0.107645	0.23848	-0.075604	0.352002	0.00850202
-0.0233113	-0.235756	0.26075	0.277659	0.0767761	0.318521	0.0435735	0.620348	0.699295	0.202261	0.673287	0.484903	0.227042	-0.175481	0.0571735	0.0355059	0.13278	0.395796			0.784247	0.56014	0.347875	0.0547227	0.191897	-0.311828	0.484351	0.107163	0.747307	0.00856794	-0.0800236	0.139216	0.181768	0.356837	0.495665	0.0353064	0.0193567	0.192514	0.42325	0.00914622					-0.145741	0.0917319	0.234435	-0.0804504	0.353095	0.0084176
-0.0294317	-0.224134	0.248627	0.266652	0.0632706	0.331743	0.0352894	0.657537	0.658294	0.236988	0.613084	0.496072	0.163878	-0.143651	0.0306691	0.0421035	0.104261	0.39335			0.798384	0.541025	0.398057	0.0413933	0.193903	-0.322353	0.623239	0.0729624	0.761452	0.00790435	-0.076606	0.171548	0.174441	0.332622	0.444666	0.0252491	0.0187174	0.187031	0.403736	0.00930362					-0.134	0.0903797	0.233919	-0.114	0.356017	0.0104962
-0.0472073	-0.219894	0.242555	0.259903	0.0439287	0.335601	0.0310597	0.614466	0.686486	0.226205	0.565707	0.492616	0.157761	-0.153138	0.0545211	0.0502679	0.103736	0.389971			0.807462	0.546651	0.43723	0.0373235	0.208676	-0.324378	0.73689	-0.00558093	0.782957	0.00385414	-0.0630177	0.175086	0.158	0.294748	0.460679	0.024526	0.0289389	0.167143	0.381711	0.00950605					-0.139007	0.100526	0.23317	-0.119397	0.35266	0.0101093
-0.0486081	-0.29567	0.252091	0.255746	0.0235532	0.340553	0.0318108	0.646834	0.649866	0.222403	0.577403	0.493583	0.105502	-0.129469	0.0622874	0.0541327	0.0884197	0.382219			0.808767	0.537716	0.519479	0.0395265	0.206863	-0.31874	0.714142	-0.0977716	0.546699	0.00171188	-0.0815889	0.181453	0.153554	0.185947	0.489465	-0.00385348	0.0226473	0.14708	0.391606	0.00720374					-0.145655	0.0945255	0.239535	-0.0891333	0.353806	0.00993548
-0.0502278	-0.309864	0.241059	0.262563	-0.00166876	0.346184	0.0351271	0.687413	0.648494	0.226653	0.582866	0.50473	0.110646	-0.0402859	0.0647093	0.0550887	0.201072	0.376642			0.75392	0.523657	0.785137	0.031684	0.211977	-0.312415	0.618048	-0.160751	0.378392	-0.00458506	-0.0696011	0.138198	0.161759	0.153637	0.43849	-0.000641001	0.0272363	0.146624	0.388498	0.00765517					-0.164954	0.10049	0.238448	-0.10417	0.347059	0.00858873
-0.055936	-0.301567	0.239881	0.270671	-0.0273285	0.356717	0.0286321	0.650089	0.675077	0.217688	0.556958	0.535421	0.0878065	0.026253	0.0693605	0.0588221	0.205061	0.365612			0.720273	0.505235	0.824769	0.0217744	0.196551	-0.298816	0.533358	-0.226071	0.391806	0.00627459	-0.0473953	0.125715	0.141039	0.133545	0.373207	-0.0165312	0.0397361	0.136433	0.400306	0.00741696					-0.1579	0.110302	0.231853	-0.110685	0.338042	0.00809384
-0.0680617	-0.303864	0.230296	0.266796	-0.0214658	0.363736	0.0183939	0.660656	0.699612	0.218235	0.521268	0.579565	0.0684439	0.0479719	0.0752506	0.0662611	0.351533	0.361227			0.71208	0.494741	0.819039	0.00486669	0.180975	-0.297335	0.496688	-0.228404	0.213409	0.0101716	-0.0574063	0.15134	0.146907	0.119568	0.362805	-0.0513092	0.0628617	0.139296	0.382727	0.00434455					-0.149418	0.112815	0.229331	-0.120317	0.329159	0.00249282
-0.0770171	-0.303044	0.223782	0.269027	-0.0131288	0.366123	0.0283702	0.702802	0.687974	0.25469	0.526851	0.584038	-0.00581406	0.0330664	0.08127	0.0717421	0.288777	0.35727			0.770605	0.506399	0.730349	0.00469542	0.195761	-0.297976	0.432844	-0.147407	-0.00843625	0.00807073	-0.0537413	0.155498	0.136907	0.146661	0.408176	-0.0530247	0.0735329	0.121359	0.361646	0.00454832					-0.170364	0.108734	0.213535	-0.143203	0.32169	0.00250921
-0.0735358	-0.301729	0.215247	0.276653	-0.00632585	0.360533	-0.00105462	0.686141	0.669795	0.24401	0.568355	0.591828	-0.0116473	-0.0211388	0.0920014	0.0786404	0.291086	0.360753			0.729871	0.533594	0.719378	0.00809079	0.169667	-0.292972	0.348691	-0.174602	-0.175669	0.00887526	-0.0532076	0.151281	0.150231	0.139192	0.385256	-0.0710085	0.0565561	0.114902	0.358044	0.00474015					-0.18692	0.114318	0.208253	-0.16111	0.317392	0.0081313
-0.0676787	-0.30285	0.216639	0.285578	-0.00915549	0.366881	-0.000613048	0.636419	0.704866	0.198031	0.563541	0.605525	-0.0151788	-0.0366665	0.115508	0.0755035	0.259872	0.353381			0.688473	0.523505	0.806577	0.0179971	0.154116	-0.285165	0.253159	-0.146082	-0.317602	0.0068312	-0.0515607	0.146188	0.167842	0.129339	0.385622	-0.0646747	0.0615486	0.120671	0.369663	0.00358964					-0.191919	0.110623	0.201958	-0.164401	0.308255	0.00847841
-0.0602511	-0.271595	0.160639	0.290972	-0.015758	0.361536	0.00253368	0.630839	0.673562	0.259817	0.516057	0.627162	-0.075098	0.00868848	0.11734	0.0718049	0.262103	0.350425			0.728627	0.504517	0.763063	0.0024783	0.148742	-0.259907	0.128543	-0.110826	-0.479107	0.00845192	-0.0594877	0.14643	0.173547	0.154778	0.376599	-0.057202	0.0626936	0.126016	0.369495	0.00202593					-0.198819	0.0925189	0.199802	-0.164417	0.30536	0.010259
-0.0634057	-0.276032	0.162869	0.282977	-0.0221595	0.359525	-0.00434048	0.5921	0.72306	0.262129	0.507334	0.639375	-0.0266162	0.0274978	0.117768	0.0697883	0.25856	0.351564			0.75261	0.484292	0.610893	-0.00361542	0.139347	-0.249176	0.0813861	-0.0738363	-0.475156	0.0125235	-0.0678682	0.140135	0.194686	0.162112	0.408628	-0.00615516	0.0603625	0.143298	0.370153	0.00648994					-0.213629	0.0933704	0.178754	-0.172637	0.295157	0.0132505
-0.0657591	-0.285925	0.165106	0.265873	-0.0333457	0.341518	-0.000784319	0.553809	0.714097	0.260875	0.514386	0.65568	0.0390915	-0.0591737	0.113718	0.0704183	0.119384	0.348689			0.77674	0.483391	0.481732	-0.0148482	0.122606	-0.237872	0.0970642	-0.0357104	-0.279645	0.0183907	-0.0670622	0.163243	0.200462	0.164992	0.432959	-0.00414534	0.0682822	0.131237	0.367583	0.00749537					-0.217896	0.0849913	0.170061	-0.158692	0.288081	0.0137293
-0.0660935	-0.285921	0.165198	0.249433	-0.0432588	0.339754	-0.00510107	0.550873	0.720274	0.259599	0.54421	0.635355	-0.0200897	-0.070217	0.112195	0.0660577	0.101667	0.351857			0.788043	0.492505	0.335179	-0.00968151	0.114011	-0.230684	0.0750472	-0.0598406	-0.293976	0.0131606	-0.0733156	0.177539	0.20823	0.167493	0.431523	0.0147677	0.0592663	0.120539	0.365601	0.00677688					-0.216073	0.0761643	0.164071	-0.184884	0.283254	0.0132347
-0.0590985	-0.281321	0.168719	0.244092	-0.0487238	0.33152	0.0236245	0.501679	0.723658	0.259541	0.571804	0.617153	-0.0138544	-0.109941	0.110753	0.0610977	-0.047644	0.347954			0.807209	0.497869	0.347385	-0.0127962	0.108792	-0.215549	0.048153	-0.0175972	-0.231247	0.0062578	-0.0650034	0.160656	0.199597	0.175376	0.481334	0.0397564	0.0582808	0.117361	0.379582	0.00740274					-0.210805	0.0644854	0.157322	-0.154385	0.278615	0.0125352
-0.0528427	-0.279356	0.176631	0.22956	-0.0532584	0.335307	0.0235851	0.451412	0.757205	0.213462	0.564669	0.58575	-0.00992571	-0.142888	0.103831	0.0521442	-0.0546389	0.343595			0.790533	0.497093	0.461057	-0.0156557	0.0955243	-0.181379	0.049894	-0.0258322	-0.229983	0.0156416	-0.0372761	0.162274	0.197867	0.129114	0.481648	0.0435907	0.0587038	0.127727	0.392968	0.00908272					-0.194676	0.0577556	0.151083	-0.143141	0.271928	0.0170938
-0.0788554	-0.276401	0.196934	0.218877	-0.0580756	0.332437	0.0325509	0.477118	0.749629	0.220937	0.517546	0.532838	-0.00630562	-0.0544526	0.105233	0.0477264	0.122382	0.342189			0.797608	0.448309	0.291329	-0.0303239	0.103659	-0.176896	0.124949	-0.0546143	-0.236372	0.0213598	-0.0399242	0.146748	0.185465	0.0822699	0.494296	0.0615616	0.067751	0.139055	0.390134	0.0087486					-0.177795	0.0528187	0.149804	-0.140081	0.271469	0.0106562
-0.0826434	-0.276121	0.201208	0.200124	-0.0634034	0.332794	0.0460551	0.522011	0.819112	0.225457	0.532351	0.471919	-0.0106317	-0.044868	0.0994619	0.0465987	0.113263	0.344559			0.807885	0.450209	-0.00464317	-0.0383888	0.110281	-0.169511	0.139697	0.0181527	-0.0456282	0.0197568	-0.0284153	0.141945	0.170486	0.0732359	0.564375	0.0553347	0.0672096	0.132511	0.38963	0.0115313					-0.176514	0.0483803	0.145772	-0.10832	0.26378	0.0084398
-0.0765639	-0.315255	0.266615	0.181933	-0.063952	0.34708	0.0613374	0.567707	0.88877	0.160751	0.539675	0.425507	0.04613	-0.0531126	0.0909345	0.0491631	0.187486	0.347078			0.751883	0.458263	-0.00981101	-0.0310871	0.101957	-0.175229	0.194725	0.0124335	-0.00750414	0.0153118	-0.0213301	0.153075	0.173978	0.0279495	0.626451	0.0316573	0.0602545	0.138759	0.398742	0.0121254					-0.174413	0.0473304	0.13494	-0.106417	0.252739	0.00633668
-0.0768889	-0.255699	0.260895	0.178137	-0.0642394	0.360216	0.0906548	0.588484	0.839131	0.212165	0.53367	0.366075	-0.0178723	-0.168575	0.0909223	0.0449266	0.273909	0.342367			0.714897	0.476697	-0.122878	-0.034511	0.0853726	-0.174726	0.189241	0.0561296	0.0569538	0.0184138	0.00412965	0.169802	0.151924	0.0166392	0.631767	0.0204062	0.0644117	0.132814	0.394702	0.0123642					-0.174672	0.0431084	0.140776	-0.101066	0.245914	0.0037204
-0.0776366	-0.245119	0.270142	0.172921	-0.0548022	0.377399	0.122357	0.603098	0.837241	0.219224	0.485789	0.301371	-0.0261551	-0.17779	0.0912504	0.041027	0.28875	0.344247			0.675847	0.480049	-0.134112	-0.0202377	0.0905444	-0.174971	0.160777	0.00515837	-0.0866133	0.005992	-0.012011	0.169697	0.141128	0.0265535	0.68452	0.0158005	0.0568803	0.150879	0.396035	0.0114672					-0.164713	0.0440471	0.133204	-0.123664	0.241034	0.00336625
-0.0294207	-0.237455	0.273714	0.160824	-0.0454298	0.361547	0.128633	0.652619	0.823011	0.229212	0.503262	0.269275	-0.0198708	-0.244452	0.0922038	0.0420876	0.29324	0.342461			0.724196	0.489924	-0.0609997	-0.0171252	0.096475	-0.169047	0.218436	-0.0228924	0.0168406	0.00425795	-0.0153736	0.169692	0.141669	0.0051957	0.699209	-0.0148118	0.0688207	0.15668	0.394207	0.00868567					-0.167188	0.0482897	0.136314	-0.117581	0.233524	0.00364906
-0.0267041	-0.229012	0.284492	0.153293	-0.0358196	0.357654	0.112844	0.675705	0.792799	0.237137	0.458437	0.205429	-0.0291639	-0.194186	0.0863569	0.042508	0.285893	0.347401			0.711481	0.479828	-0.301889	0.00156116	0.106841	-0.160175	0.327971	-0.0595849	0.00466867	0.013694	-0.00424803	0.177887	0.14983	-0.0232397	0.646529	-0.0043648	0.0788329	0.151971	0.392002	0.00947212					-0.18512	0.0526183	0.131946	-0.13979	0.229122	0.00930839
-0.0320655	-0.238596	0.280094	0.155257	-0.0279332	0.355381	0.128955	0.668574	0.80242	0.24493	0.460285	0.145813	0.0313636	-0.157934	0.0879102	0.0435484	0.346338	0.355567			0.696313	0.481793	-0.338155	-0.0120563	0.103282	-0.170721	0.379807	-0.0756763	0.0789614	0.0105237	-0.0157272	0.175288	0.140604	-0.054592	0.578386	-0.0093027	0.0869839	0.145006	0.369816	0.0070416					-0.190706	0.0539641	0.127439	-0.145735	0.22352	0.00422665
-0.00993732	-0.24957	0.273506	0.156704	-0.0208478	0.309341	0.150056	0.711721	0.770536	0.302974	0.499538	0.116662	0.0256517	-0.168694	0.0749755	0.0437307	0.15974	0.362276			0.683209	0.506095	-0.178148	-0.00742287	0.100773	-0.147122	0.340012	-0.0834973	0.144221	0.00968834	-0.0087348	0.183853	0.141015	-0.0377018	0.604722	-0.0262118	0.0978126	0.136289	0.362002	0.00756155					-0.210738	0.0573686	0.120957	-0.156959	0.208641	0.00401722
-0.0176219	-0.262417	0.265105	0.169958	-0.0105509	0.266077	0.127213	0.691563	0.711538	0.315139	0.51607	0.0816559	0.0924113	-0.174408	0.0718229	0.0490418	0.160142	0.366419			0.65889	0.499166	0.0332751	-0.00604397	0.112291	-0.12539	0.341153	-0.124229	0.0429605	0.0199032	-0.0185559	0.193357	0.134371	-0.0417659	0.55588	-0.0304597	0.0943695	0.135569	0.353872	0.00758051					-0.215952	0.0646442	0.114648	-0.179374	0.208431	0.00505522
-0.0241229	-0.26349	0.255024	0.187036	-0.000322023	0.216939	0.134448	0.653703	0.687028	0.321424	0.513448	0.0336713	0.0375483	-0.205067	0.0749285	0.0555649	0.0877441	0.377874			0.642266	0.487822	-0.01061	-0.0114616	0.116027	-0.112268	0.325134	-0.133911	0.0804403	0.0286812	-0.0259168	0.193271	0.139173	-0.0107967	0.507543	-0.0342745	0.109497	0.136223	0.350821	0.0092988					-0.214807	0.0679317	0.112103	-0.191843	0.204993	0.00552767
0.015986	-0.329172	0.252681	0.195899	0.00830714	0.163075	0.129421	0.629203	0.704757	0.280274	0.476557	0.0304641	0.0457788	-0.084325	0.0745814	0.0566514	0.055156	0.390632			0.631822	0.473877	0.247866	-0.0143365	0.134823	-0.093485	0.346487	-0.150225	0.196371	0.0229889	-0.0173211	0.187218	0.135997	0.00385397	0.440406	-0.0473208	0.0967696	0.137095	0.344869	0.00907245					-0.206157	0.07745	0.101948	-0.218354	0.201381	0.00552944
0.0164295	-0.344797	0.247662	0.192752	0.00985062	0.115315	0.103947	0.600629	0.667816	0.325735	0.510245	0.0124191	-0.0204547	0.0106012	0.071168	0.0600633	0.0398435	0.399253			0.655003	0.470598	0.280736	-0.0168944	0.129938	-0.0807964	0.364592	-0.0563855	0.309027	0.037302	0.0166783	0.184341	0.128664	-0.0121813	0.465526	-0.0557768	0.1087	0.125215	0.340264	0.0110253					-0.222001	0.0757015	0.0986722	-0.223712	0.198086	0.00647897
-0.0242133	-0.332585	0.213148	0.194699	0.0127976	0.0905006	0.0914141	0.581073	0.675007	0.318846	0.495097	-0.00809773	0.0308697	0.00710724	0.097794	0.0664807	0.0876816	0.410704			0.6085	0.448586	0.304323	-0.0326587	0.13793	-0.0861913	0.431377	0.029465	0.33818	0.0378664	0.0402781	0.189271	0.122808	0.0289869	0.461927	-0.0429459	0.093489	0.143261	0.339383	0.0131646					-0.217164	0.0639678	0.0849922	-0.211011	0.195389	0.010257
-0.0290953	-0.320098	0.181279	0.193383	0.0140353	0.0603934	0.124933	0.58771	0.67064	0.319857	0.540989	-0.0152621	0.0236159	0.00316262	0.0971217	0.0740994	0.0813454	0.415168			0.599241	0.459164	0.293259	-0.0469074	0.140099	-0.100957	0.355837	0.0435891	0.406525	0.0226833	0.0347472	0.202532	0.11401	0.0720212	0.520138	-0.053968	0.0824451	0.146935	0.332791	0.0106885					-0.207912	0.0609395	0.0832139	-0.214387	0.189434	0.00998247
-0.0250681	-0.281711	0.165824	0.179634	0.0154639	0.0243901	0.102038	0.617269	0.666442	0.327306	0.540905	-0.0222304	0.0258679	-0.00221784	0.10051	0.0973865	0.0473313	0.413106			0.556502	0.443106	0.340312	-0.0404666	0.145345	-0.106642	0.277499	0.0413059	0.472548	0.0196033	0.0307878	0.200533	0.124012	0.119638	0.592685	-0.0438019	0.0865462	0.155864	0.350571	0.0119853					-0.207535	0.0606172	0.0894282	-0.200386	0.191003	0.0112627
-0.064955	-0.277183	0.180411	0.160956	0.0163983	0.043618	0.0948605	0.56886	0.688863	0.285724	0.550235	-0.0328127	-0.0420494	-0.0882169	0.107847	0.116547	0.0600206	0.404446			0.57232	0.437039	0.284441	-0.0479749	0.141173	-0.131941	0.196394	0.134047	0.55581	0.0166377	0.0257925	0.211868	0.120835	0.0965665	0.617753	-0.0507943	0.0730126	0.169509	0.35207	0.0121162					-0.199262	0.0647872	0.0914901	-0.190533	0.190449	0.0120897
-0.0621686	-0.246219	0.147772	0.148756	0.0125461	0.0571911	0.138416	0.559575	0.662597	0.305243	0.521309	-0.0424854	-0.108908	-0.166405	0.140643	0.133513	0.0550154	0.404673			0.580959	0.433909	0.289423	-0.0483962	0.123661	-0.145628	0.146782	0.149758	0.582244	0.0148771	0.0278727	0.179484	0.132921	0.116084	0.609244	-0.0642902	0.0681017	0.187656	0.367789	0.0101444					-0.19972	0.0644908	0.103099	-0.181316	0.18682	0.0141354
-0.0612154	-0.244085	0.147598	0.127418	0.00274266	0.0797954	0.142087	0.547464	0.621595	0.314381	0.526183	-0.0481892	-0.10946	-0.140734	0.140487	0.146708	0.0906971	0.395966			0.622515	0.420659	0.29505	-0.0501064	0.123747	-0.147601	0.11302	0.125368	0.606928	0.00977928	0.0350326	0.157031	0.119971	0.0945841	0.632923	-0.0923234	0.0528858	0.185341	0.385791	0.0112525					-0.204816	0.0628763	0.102417	-0.187144	0.182741	0.0131191
-0.102063	-0.254105	0.14199	0.120168	-0.00757465	0.0975113	0.169071	0.581242	0.618349	0.320708	0.593142	-0.0747176	-0.118427	-0.177079	0.136646	0.191409	0.0411438	0.380437			0.617819	0.432651	0.237353	-0.0461026	0.132748	-0.16325	0.116255	0.107689	0.470927	0.0122864	0.0330043	0.15669	0.12292	0.0755657	0.709104	-0.112901	0.0457259	0.184871	0.386261	0.00873454					-0.206804	0.053441	0.10742	-0.16499	0.178281	0.0124366
-0.099443	-0.242599	0.108669	0.137564	-0.0166433	0.127145	0.194103	0.614664	0.630558	0.278333	0.609118	-0.0755376	-0.11533	-0.187051	0.138508	0.224074	0.0628518	0.371348			0.583427	0.42607	0.317275	-0.049586	0.12971	-0.184545	0.0991709	0.0558423	0.411002	-0.00144295	0.0172012	0.14824	0.121029	0.0543895	0.635753	-0.134022	0.0402669	0.189269	0.380943	0.00838487					-0.195317	0.0513444	0.114303	-0.145475	0.174877	0.0128475
-0.064072	-0.259824	0.125737	0.150675	-0.026015	0.159397	0.243411	0.632437	0.587825	0.343249	0.635134	-0.0846314	-0.138981	0.0361729	0.105868	0.254124	0.0524844	0.361316			0.553823	0.427599	0.206534	-0.0468179	0.128749	-0.185354	-0.0311853	-0.0812946	0.43759	0.00296896	0.00609426	0.135402	0.121228	0.024072	0.692793	-0.130784	0.0535599	0.183612	0.39356	0.00956517					-0.218453	0.0572923	0.118069	-0.152823	0.172176	0.010816
-0.016412	-0.260768	0.133326	0.157363	-0.0368608	0.197158	0.238217	0.5975	0.56261	0.336314	0.671138	-0.109119	-0.18872	0.0110376	0.11183	0.300422	0.0576311	0.352124			0.53054	0.416136	0.215719	-0.0373088	0.107012	-0.187762	-0.0933412	-0.0758948	0.447452	0.00846627	0.0129061	0.12887	0.122281	0.00564646	0.616589	-0.127938	0.053388	0.190886	0.398657	0.0115857					-0.220472	0.0575186	0.122891	-0.135272	0.168241	0.00594981
0.0330713	-0.29025	0.146922	0.187973	-0.0530305	0.195256	0.263278	0.567455	0.581973	0.318405	0.688274	-0.130592	-0.246935	-0.0875364	0.110307	0.336407	0.0710543	0.344328			0.547936	0.433016	0.23959	-0.0373921	0.0882179	-0.190061	-0.137901	-0.0821645	0.417528	-0.00193197	0.0172853	0.129944	0.118523	-0.011144	0.56666	-0.150484	0.0537662	0.185366	0.409991	0.0120142					-0.224305	0.0645708	0.112414	-0.121633	0.160699	0.00634855
0.0756521	-0.270879	0.115744	0.21376	-0.0723599	0.1997	0.271413	0.547209	0.591307	0.297954	0.703517	-0.152951	-0.22275	-0.0412475	0.113074	0.390912	0.0638832	0.343692			0.487464	0.420104	0.321554	-0.0366455	0.0955032	-0.196274	-0.151404	-0.128478	0.365531	-0.00546424	0.0218984	0.116473	0.12599	0.0213998	0.518773	-0.17837	0.0583111	0.172133	0.423992	0.00969047					-0.226569	0.0614124	0.105382	-0.106956	0.157662	0.00586409
0.0767637	-0.25248	0.141854	0.228283	-0.0863751	0.198823	0.245262	0.558738	0.605976	0.265322	0.756387	-0.164965	-0.167512	0.0076882	0.0796927	0.527083	0.0804672	0.33775			0.481913	0.411274	0.202216	-0.0480767	0.0879355	-0.212259	-0.139731	-0.0526841	0.367852	-0.00979621	0.0207374	0.13018	0.122782	0.00788045	0.577609	-0.169391	0.0669043	0.153139	0.406895	0.00894492					-0.22808	0.0572072	0.0945389	-0.118434	0.150926	0.00383055
0.074411	-0.230107	0.12377	0.24947	-0.099509	0.193871	0.243735	0.551158	0.63535	0.246647	0.824092	-0.183448	-0.179067	-0.0312333	0.0845776	0.687968	0.0768084	0.328078			0.477642	0.423128	0.277808	-0.0501421	0.0829102	-0.215011	-0.094983	0.0301765	0.343841	-0.00960486	0.0301951	0.148982	0.13831	0.0162043	0.545278	-0.136915	0.0735912	0.150002	0.388692	0.00772336					-0.230484	0.0603594	0.0934022	-0.126011	0.14735	0.00356931
0.0692019	-0.106288	0.130619	0.257653	-0.109829	0.200949	0.201474	0.537497	0.61211	0.288859	0.813896	-0.201292	-0.182764	-0.10933	0.0866481	0.788559	0.0970595	0.327046			0.470913	0.428158	0.272327	-0.0523171	0.0739907	-0.203942	-0.0818845	0.00148324	0.386429	-0.00691828	0.0382483	0.156526	0.132736	0.00525738	0.527868	-0.125167	0.0973392	0.138694	0.399071	0.00987117					-0.235295	0.0699431	0.0885805	-0.117809	0.144377	0.00779255
0.065339	-0.0783931	0.149435	0.246625	-0.117315	0.207511	0.192992	0.520261	0.599158	0.265073	0.828597	-0.236978	-0.189375	-0.0708349	0.0903468	0.887212	0.126296	0.325443			0.503283	0.414881	0.233442	-0.051124	0.0800166	-0.173576	-0.0548235	-0.0562923	0.352118	0.00773254	0.0539251	0.185083	0.139701	0.00803674	0.530306	-0.111413	0.100127	0.137487	0.400288	0.00710806					-0.236547	0.0816744	0.0815008	-0.120206	0.140427	0.00613867
0.0270349	-0.0196214	0.173599	0.239651	-0.124979	0.215774	0.169909	0.488575	0.632117	0.197319	0.836466	-0.266388	-0.222568	-0.198612	0.097547	0.997358	0.106776	0.325587			0.498818	0.420959	0.289591	-0.049047	0.0744801	-0.165336	0.0862826	0.0203767	0.30611	-0.00475372	0.0452099	0.199469	0.139272	0.00981781	0.478662	-0.147442	0.0928511	0.127795	0.393547	0.00621814					-0.227199	0.104336	0.0780318	-0.128162	0.134712	0.00497866
-0.012576	0.0171507	0.206612	0.233598	-0.129484	0.209816	0.162428	0.505304	0.675326	0.200613	0.837252	-0.264849	-0.228877	-0.283401	0.0986946	1.05393	0.127269	0.324816			0.558167	0.41393	0.532496	-0.0622498	0.0788043	-0.15358	0.190173	0.0517917	0.297211	0.000327499	0.047142	0.197251	0.140673	0.0215319	0.497866	-0.141285	0.0974922	0.129904	0.399958	0.00666742					-0.232123	0.131667	0.0714771	-0.143072	0.13036	0.00732482
-0.0172911	0.0731573	0.243188	0.208863	-0.132124	0.25159	0.166586	0.518596	0.60096	0.250535	0.849219	-0.253109	-0.189061	-0.180143	0.0974035	1.15155	0.115633	0.323796			0.56222	0.414283	0.490135	-0.0702685	0.082625	-0.144905	0.347416	0.1243	0.282784	0.00627964	0.0460604	0.216318	0.137822	-0.000727839	0.502388	-0.153066	0.0866233	0.129846	0.38539	0.00694091					-0.237273	0.155555	0.0703128	-0.167741	0.124468	0.00692339
-0.0140736	0.132078	0.28016	0.185139	-0.133626	0.262043	0.173402	0.530448	0.598007	0.256164	0.797573	-0.232984	-0.212778	-0.154588	0.122302	1.16053	0.127777	0.319477			0.574818	0.422043	0.514341	-0.0702449	0.0719148	-0.132013	0.454177	0.160763	0.29732	0.0136902	0.0485325	0.239598	0.12832	-0.00077209	0.569806	-0.117668	0.0888559	0.135482	0.382425	0.00919723					-0.234847	0.194622	0.0720916	-0.191823	0.123443	0.0105861
-0.0164898	0.142063	0.299424	0.160172	-0.135961	0.267984	0.188557	0.512149	0.609369	0.252965	0.807662	-0.21155	-0.268912	-0.0777418	0.103833	1.08122	0.125607	0.313698			0.543827	0.431785	0.463242	-0.0725836	0.0685734	-0.0943052	0.600573	-0.00730109	0.236204	0.0143853	0.0505104	0.254482	0.124574	0.00570212	0.50492	-0.133234	0.0954915	0.152967	0.38062	0.0122877					-0.249142	0.235505	0.067694	-0.174282	0.120872	0.009454
0.0328998	0.177264	0.313215	0.133579	-0.135913	0.273755	0.190021	0.515702	0.574483	0.303528	0.804395	-0.171232	-0.243104	-0.0582063	0.105845	0.966192	0.0868598	0.307875			0.569974	0.436597	0.49708	-0.0693375	0.0471812	-0.0803991	0.583373	-0.0540909	0.276497	0.0187961	0.0480057	0.273798	0.10554	0.0219732	0.516486	-0.120529	0.0897017	0.15118	0.376483	0.0104297					-0.255546	0.264344	0.0693814	-0.164089	0.117915	0.00942242
0.0833991	0.0865243	0.345514	0.111572	-0.114205	0.269303	0.196651	0.48474	0.596053	0.238595	0.806395	-0.129253	-0.224562	0.0371818	0.134257	0.893333	0.0513919	0.302715			0.56498	0.438616	0.325018	-0.0647707	0.0504564	-0.0589482	0.705942	-0.0353668	0.317865	0.00787763	0.0430373	0.285312	0.117348	0.0571146	0.522175	-0.127011	0.0797779	0.157288	0.374383	0.00885154					-0.26548	0.28326	0.0675926	-0.183354	0.114962	0.00676732
0.137792	0.178749	0.366167	0.0920005	-0.0973097	0.248823	0.183588	0.481976	0.636345	0.243336	0.799904	-0.0850959	-0.222492	0.07653	0.124385	0.814432	0.0125076	0.292019			0.565327	0.441176	0.295831	-0.0716676	0.0459725	-0.0616023	0.740203	0.0167397	0.427132	0.00507817	0.0160704	0.267331	0.109061	0.0804049	0.551034	-0.107046	0.0790626	0.156967	0.385117	0.00953417					-0.271419	0.297811	0.0755442	-0.190566	0.113284	0.00797219
0.13778	0.171464	0.344283	0.0801013	-0.0881734	0.226367	0.19437	0.445229	0.600664	0.235443	0.802197	-0.0253981	-0.17522	0.0686529	0.115522	0.736464	0.00399086	0.282797			0.55689	0.430023	0.327538	-0.0822352	0.0421637	-0.0547582	0.748726	-0.0075863	0.444868	0.0161113	0.0261045	0.271975	0.114796	0.0913774	0.603644	-0.0945637	0.0707553	0.167992	0.383799	0.00877337					-0.273449	0.307423	0.0836627	-0.198052	0.109819	0.00703075
0.177472	0.215769	0.330228	0.0773564	-0.0729671	0.204954	0.183349	0.415042	0.584986	0.218865	0.801895	0.0222404	-0.17575	0.150594	0.11297	0.683733	0.000500452	0.271588			0.495042	0.421516	0.311317	-0.0888904	0.0391799	-0.0483685	0.800458	0.0128444	0.525407	0.0124867	0.0462746	0.277006	0.112487	0.0742897	0.587958	-0.139618	0.0645524	0.161144	0.387285	0.00760936					-0.272539	0.322127	0.0795457	-0.185852	0.109518	0.00528251
0.180601	0.203622	0.318644	0.084576	-0.0639439	0.177238	0.174879	0.418097	0.606142	0.163074	0.827141	0.0556269	-0.205277	0.114405	0.115213	0.563095	-0.0382108	0.264243			0.498775	0.41623	0.327729	-0.0883062	0.0426427	-0.0408707	0.783637	-0.0329903	0.413019	0.0190842	0.0462165	0.269998	0.112767	0.120049	0.634889	-0.1261	0.0703104	0.160006	0.397553	0.00803374					-0.283071	0.336654	0.0913567	-0.18616	0.111726	0.00796135
0.182294	0.150519	0.296155	0.090138	-0.0534541	0.17161	0.158528	0.441057	0.568691	0.151713	0.907796	0.0835968	-0.207471	0.0478302	0.0882085	0.489125	-0.0481568	0.260018			0.504879	0.429623	0.27817	-0.0870587	0.0447321	-0.0237629	0.828928	-0.0224387	0.286862	0.011425	0.0457461	0.264474	0.109594	0.119895	0.623881	-0.111985	0.0549138	0.165977	0.400044	0.00821935					-0.296892	0.325125	0.089395	-0.157467	0.11041	0.0036836
0.224122	0.112533	0.287999	0.100906	-0.0323343	0.171666	0.152836	0.446229	0.562392	0.148736	0.898956	0.108333	-0.153563	-0.00665985	0.10552	0.433657	-0.059185	0.255016			0.474865	0.433294	0.340968	-0.0917137	0.0536291	-0.0277953	0.815274	0.0157818	0.305258	0.0133404	0.0386352	0.261079	0.102545	0.125553	0.683581	-0.137135	0.0438075	0.164709	0.41121	0.0126557					-0.285242	0.308178	0.0912518	-0.156393	0.109523	0.00403341
0.222299	0.0791044	0.268953	0.112442	-0.0115716	0.171036	0.136395	0.456452	0.557753	0.0899682	0.913697	0.113561	-0.124713	0.0118188	0.102678	0.41021	-0.0390729	0.251208			0.480416	0.426358	0.355328	-0.0957548	0.0628925	-0.0249894	0.83345	0.0133629	0.164797	0.00929056	0.0586471	0.243374	0.107684	0.13826	0.677713	-0.176624	0.0457668	0.176103	0.423937	0.0140811					-0.281973	0.309205	0.0855491	-0.15024	0.105965	0.0044434
0.176993	0.085383	0.215792	0.126349	-0.0117804	0.168891	0.161836	0.440434	0.55045	0.0965535	0.929282	0.113328	-0.0858893	0.0224029	0.0661451	0.389547	-0.0365515	0.2454			0.485715	0.41006	0.605432	-0.0973843	0.0479674	-0.0382028	0.755038	0.0659506	-0.000914483	0.0189769	0.0787886	0.232355	0.117625	0.120426	0.621569	-0.181168	0.0554863	0.176754	0.419586	0.0158424					-0.253537	0.304441	0.0875072	-0.159444	0.104731	0.00373549
0.130742	-0.0066866	0.180977	0.140587	-0.012073	0.177611	0.200238	0.430536	0.523451	0.101012	0.940224	0.118179	-0.0277913	0.0239039	0.0739205	0.364372	-0.0242392	0.237467			0.45842	0.414086	0.458252	-0.104622	0.0498482	-0.0432235	0.790741	0.060469	0.0864268	0.0244158	0.0977335	0.235075	0.1251	0.116711	0.624475	-0.225928	0.0508681	0.177687	0.414182	0.0157924					-0.253416	0.297965	0.0802685	-0.155766	0.0996512	0.00331565
0.171944	-0.0724669	0.206927	0.142741	-0.00290166	0.183615	0.202042	0.427166	0.547228	0.101131	0.947763	0.110471	-0.0289092	0.00459069	0.0824562	0.328698	-0.0223825	0.235974			0.468272	0.412323	0.426035	-0.0893834	0.0558977	-0.0390904	0.744047	0.0350983	0.234092	0.0167783	0.111389	0.249817	0.114953	0.117729	0.578149	-0.237069	0.0477352	0.167502	0.415909	0.0174327					-0.253877	0.287824	0.0685412	-0.157238	0.101117	0.00334186
0.130105	-0.165482	0.222216	0.142481	-0.0036681	0.187508	0.185064	0.419422	0.560671	0.108471	0.961957	0.100364	0.0316896	0.0127793	0.0868082	0.291558	-0.0453763	0.237375			0.466733	0.421554	0.433946	-0.0890525	0.0552483	-0.0333854	0.640444	-0.00290892	0.00587337	0.0128657	0.0922023	0.268053	0.113759	0.141802	0.643378	-0.213515	0.0536829	0.174686	0.406954	0.0185764					-0.229248	0.27376	0.0752764	-0.166051	0.100698	0.0020618
0.14224	-0.194338	0.221024	0.13835	0.0044479	0.19112	0.177727	0.381106	0.54176	0.115071	0.967915	0.091435	0.0691206	-0.0359026	0.0803621	0.292597	-0.0168414	0.240264			0.490995	0.41296	0.476494	-0.0818646	0.0454672	-0.0210414	0.467137	-0.0359195	0.0182036	0.0116477	0.089651	0.27156	0.115042	0.15566	0.672709	-0.238267	0.0507917	0.179194	0.401145	0.0180698					-0.226123	0.252395	0.06271	-0.153162	0.0988954	-0.00130116
0.097605	-0.192016	0.232189	0.145853	0.00993934	0.198876	0.184532	0.325478	0.571216	0.119585	0.955829	0.0696877	0.073665	0.0465524	0.0746846	0.312392	-0.0230063	0.245895			0.466443	0.398627	0.309863	-0.0809026	0.0396909	-0.0209011	0.305614	-0.10081	-0.0005596	0.0174473	0.0950478	0.26687	0.119389	0.154565	0.688819	-0.278894	0.0614701	0.185251	0.391823	0.0174306					-0.198357	0.239906	0.0615484	-0.178336	0.095205	-0.00144295
0.113942	-0.184343	0.240162	0.158588	0.00726199	0.208611	0.208582	0.302903	0.541042	0.127679	0.989292	0.0495201	0.0712881	0.0252592	0.0734321	0.327469	-0.00695243	0.259044			0.47674	0.398425	0.399155	-0.0715331	0.0254421	-0.028792	0.140211	0.00237661	0.00365804	0.0229614	0.111268	0.270266	0.123292	0.157024	0.688995	-0.228623	0.0816716	0.185269	0.387413	0.0123518					-0.182265	0.232457	0.0568503	-0.204288	0.0940568	-0.00167388
0.112351	-0.222955	0.260199	0.173309	0.00316263	0.216167	0.201996	0.302107	0.583716	0.132966	1.00089	0.0414828	0.0648307	-0.0183979	0.0782449	0.339427	-0.00116092	0.274313			0.397199	0.395524	0.406457	-0.0750232	0.0318753	-0.0349031	0.0706169	-0.024398	0.00886759	0.0338433	0.0959933	0.290165	0.120237	0.139947	0.671856	-0.229728	0.0820522	0.176969	0.377976	0.0121209					-0.137063	0.221894	0.0603146	-0.227784	0.0951249	-0.00145928
0.115069	-0.234393	0.281711	0.192646	-0.00387127	0.228272	0.17265	0.334346	0.552844	0.187813	1.01138	0.0332601	0.0564119	-0.138577	0.0844898	0.328902	0.00766133	0.29441			0.39626	0.386647	0.368039	-0.0833576	0.0359873	-0.0395877	0.0295967	-0.067912	0.166223	0.0354526	0.0796154	0.298106	0.108915	0.155927	0.732694	-0.25135	0.0762113	0.186477	0.358549	0.0104744					-0.133371	0.219075	0.0562732	-0.230967	0.0967546	-0.000697733
0.15878	-0.250157	0.304715	0.219672	-0.0281085	0.241967	0.130998	0.354404	0.543092	0.185774	1.02436	0.0285407	0.0412771	-0.226379	0.084834	0.347952	-0.0049032	0.318108			0.402332	0.362273	0.610399	-0.0818335	0.0332189	-0.0259597	-0.103354	-0.0823786	0.0722665	0.0257023	0.0760717	0.312207	0.10265	0.184812	0.673696	-0.26228	0.0696973	0.188822	0.356076	0.0131778					-0.0765818	0.221549	0.0537887	-0.238355	0.0995008	-0.00200357
0.115231	-0.227631	0.281948	0.253879	-0.049968	0.253311	0.100152	0.350084	0.521798	0.191887	1.03657	0.0168358	0.0363004	-0.149874	0.07598	0.358158	0.0278263	0.334037			0.398003	0.37062	0.787356	-0.0949846	0.0169451	-0.0188639	-0.181885	-0.0550247	-0.0406797	0.0355522	0.0524974	0.303719	0.117061	0.213849	0.738857	-0.282494	0.0963202	0.202058	0.330377	0.0139329					-0.0244538	0.219011	0.0479015	-0.220977	0.0985412	-0.000357739
0.159924	-0.219792	0.260988	0.288123	-0.0429107	0.268455	0.131668	0.35052	0.465826	0.197778	1.03331	0.0032146	0.0232521	-0.191672	0.071789	0.375456	0.0333443	0.353704			0.368991	0.355185	0.774519	-0.0986337	0.00763516	-0.00743053	-0.205676	-0.0345753	-0.0017331	0.0446663	0.0429785	0.282641	0.12575	0.217565	0.652529	-0.278237	0.0799504	0.206079	0.329795	0.0150171					-0.0233224	0.206969	0.0434807	-0.225065	0.0961068	-0.000674507
0.104046	-0.224043	0.233242	0.330095	-0.0355546	0.283754	0.125763	0.350884	0.503499	0.207782	0.964251	-0.00530214	0.0130786	-0.15816	0.0747338	0.369744	0.0102003	0.37248			0.31237	0.355755	0.732749	-0.104615	0.0141166	-0.0147545	-0.0426811	-0.00155188	0.154916	0.0432457	0.0660126	0.286308	0.127997	0.209831	0.571227	-0.252379	0.0731646	0.206517	0.325355	0.0134988					0.0121985	0.194341	0.0416007	-0.25222	0.0971387	-0.001331
0.11155	-0.245435	0.216124	0.365269	-0.0218108	0.290119	0.0974209	0.350301	0.497543	0.207517	0.9837	0.0119649	0.0101605	-0.246653	0.0829773	0.379627	0.0137938	0.392208			0.297535	0.353798	0.741527	-0.098747	0.0229827	-0.0218664	0.125462	0.0271581	0.313031	0.051987	0.0588545	0.302278	0.1338	0.226692	0.533026	-0.242402	0.0817994	0.203886	0.324808	0.0145705					0.0522647	0.190258	0.0353161	-0.253423	0.0951657	-0.000666909
0.0565814	-0.285309	0.200919	0.392639	-0.0366215	0.304534	0.0672659	0.364898	0.493774	0.203695	0.929749	0.0463389	0.0118066	-0.19467	0.0946416	0.370464	0.00559678	0.40784			0.310848	0.338591	0.590432	-0.101869	0.032373	-0.029919	0.306928	-0.0578132	0.178581	0.0435452	0.0488297	0.310927	0.134192	0.225262	0.502153	-0.259103	0.0607036	0.192758	0.320477	0.0155828					0.0617609	0.183111	0.0261127	-0.257679	0.0947732	0.00387805
0.0143328	-0.273897	0.200903	0.418176	-0.030649	0.309991	0.0843391	0.369489	0.452625	0.207506	0.962301	0.0708802	-0.0043947	-0.258732	0.0848053	0.347402	-0.0205773	0.419351			0.327264	0.337322	0.646279	-0.093311	0.0250881	-0.0266681	0.34504	0.0695079	0.1806	0.0274144	0.0621126	0.290633	0.135589	0.249781	0.575135	-0.23714	0.0678374	0.198344	0.320201	0.0166133					0.0725644	0.17512	0.0191745	-0.260983	0.0927649	0.00426943
0.0181465	-0.290413	0.201969	0.438484	-0.0414348	0.312924	0.0608709	0.381403	0.472046	0.147622	0.908909	0.109663	-0.002428	-0.177091	0.083533	0.345095	-0.0126993	0.424958			0.360906	0.33186	0.456145	-0.0812979	0.000826899	-0.0126272	0.332317	0.108905	0.0494667	0.0260174	0.053023	0.288355	0.12686	0.242187	0.59633	-0.197181	0.0822381	0.196932	0.333809	0.0186895					0.0849367	0.16408	0.0181672	-0.260326	0.0864512	0.0033915
-0.0262697	-0.298225	0.196395	0.456259	-0.0308955	0.309133	0.0478539	0.355089	0.481616	0.151406	0.867933	0.138345	0.000557894	-0.160624	0.0809443	0.322775	-0.0241782	0.436048			0.400315	0.358837	0.480243	-0.075543	-0.00631361	-0.0164202	0.327167	0.061484	-0.163364	0.0317617	0.046942	0.275714	0.134992	0.218189	0.631113	-0.196263	0.0748651	0.203022	0.332655	0.0169959					0.113526	0.150017	0.0253005	-0.235496	0.0842654	0.00407943
0.0151905	-0.313706	0.190777	0.46937	-0.0254409	0.307663	0.0341901	0.382211	0.512132	0.152463	0.884971	0.178859	-0.00539334	-0.219352	0.0906706	0.335343	-0.0701665	0.454321			0.450992	0.351836	0.180532	-0.0783938	-0.0124433	-0.0231773	0.354942	0.113739	-0.0875008	0.0398485	0.0468236	0.283075	0.139887	0.190732	0.635068	-0.157394	0.0538254	0.187156	0.349139	0.0176315					0.0913822	0.154167	0.0302714	-0.237972	0.0823964	0.0031938
-0.027482	-0.340291	0.182671	0.489877	-0.0481745	0.311082	0.00170482	0.382407	0.538664	0.14913	0.835225	0.224727	-0.00732558	-0.191114	0.0908686	0.337846	-0.070325	0.466315			0.513549	0.356327	-0.000249796	-0.0713053	-0.0116801	-0.0308918	0.35505	0.0955	0.0387515	0.0373763	0.0527274	0.288763	0.131548	0.146755	0.673619	-0.164038	0.0670603	0.172065	0.345525	0.0153924					0.0811281	0.163617	0.0237532	-0.238122	0.0804126	0.0038402
0.011193	-0.365888	0.176038	0.509006	-0.0672166	0.300522	0.000429026	0.39547	0.522364	0.155351	0.812211	0.266548	-0.0513855	-0.144633	0.08636	0.336465	-0.0717573	0.476727			0.54537	0.352598	0.104323	-0.0725123	-0.01915	-0.0271649	0.275052	0.112885	0.00446894	0.0394584	0.0306375	0.308003	0.124772	0.110576	0.695619	-0.157787	0.0688003	0.175664	0.345118	0.0173312					0.0871091	0.184301	0.0262115	-0.206039	0.0756578	0.00922406
0.00546675	-0.374373	0.159048	0.529017	-0.0955554	0.311348	-0.00719182	0.407026	0.503586	0.14269	0.714658	0.289286	-0.0163746	-0.0535822	0.0812981	0.329214	-0.0693116	0.481311			0.635524	0.361075	0.129185	-0.0779602	-0.0262575	-0.0110265	0.148368	0.110929	-0.131192	0.0379036	0.0514958	0.304081	0.13417	0.0923384	0.684318	-0.139417	0.0690162	0.161037	0.339155	0.0185726					0.0618966	0.200032	0.0414445	-0.187298	0.0749252	0.00909395
0.00787121	-0.375371	0.139153	0.549404	-0.0824367	0.309067	-0.0257332	0.42544	0.539396	0.150812	0.71636	0.296332	-0.0734595	-0.0479747	0.0792738	0.336321	-0.0744758	0.488455			0.638902	0.366807	0.291788	-0.0727163	-0.0306093	0.0223055	0.0254116	0.136008	0.0218995	0.0481835	0.0949731	0.297955	0.136412	0.0785363	0.68211	-0.162479	0.0745906	0.156326	0.353967	0.0178868					0.0601357	0.219618	0.0468928	-0.149711	0.0728225	0.00642762
0.00762133	-0.386626	0.113017	0.576029	-0.107722	0.311275	-0.0495925	0.402024	0.557744	0.157904	0.628763	0.313672	-0.0675986	0.188528	0.0845384	0.349208	-0.0559834	0.496394			0.620714	0.363848	0.0582474	-0.0760088	-0.0399585	0.0374732	0.0220676	0.0133044	-0.00349402	0.0475242	0.0994446	0.303761	0.153567	0.0309745	0.633626	-0.167262	0.0701607	0.151522	0.351631	0.015371					0.0320253	0.240039	0.0496559	-0.143342	0.0709447	0.0063764
0.0105238	-0.405429	0.0906298	0.611381	-0.105624	0.314499	-0.0383832	0.375486	0.541545	0.163844	0.677046	0.317468	-0.0826952	0.323998	0.107323	0.344271	-0.0759776	0.50533			0.578718	0.369636	0.071533	-0.0860936	-0.0157037	0.0444564	0.0217118	-0.0585129	0.101408	0.0601614	0.165281	0.308495	0.171548	0.0321273	0.639586	-0.205381	0.0479832	0.133673	0.362603	0.0147169					0.0342132	0.276715	0.0471669	-0.143473	0.0708037	0.00518284
0.043468	-0.434237	0.0653635	0.644422	-0.107671	0.312615	-0.0399658	0.370203	0.528858	0.161467	0.70352	0.32324	-0.0819757	0.245309	0.10536	0.348909	-0.0557498	0.518578			0.569863	0.362903	-0.140628	-0.0899251	-0.00944952	0.0568686	0.0849883	0.0410881	0.284216	0.049989	0.191729	0.316221	0.169229	0.0457904	0.648887	-0.174549	0.0704409	0.135796	0.357625	0.0139225					-0.0131521	0.319869	0.0333949	-0.152815	0.0688992	0.00585143
0.00579273	-0.457151	0.0434045	0.674094	-0.10966	0.318473	-0.0467881	0.348964	0.497675	0.163339	0.667439	0.320739	-0.124807	0.257811	0.100406	0.322688	-0.0523835	0.509676			0.504779	0.364085	0.11494	-0.0811787	-0.000322261	0.0604028	0.108518	0.00296785	0.257648	0.0422594	0.229965	0.313957	0.147458	0.0539372	0.591037	-0.173852	0.0793757	0.126839	0.353796	0.0145241					-0.0103688	0.343362	0.0304319	-0.168142	0.0672252	0.00534964
-0.000405069	-0.455261	0.0379178	0.687559	-0.115589	0.313912	-0.0584941	0.348313	0.469131	0.13883	0.729249	0.321101	-0.103537	0.175422	0.0942961	0.313405	-0.0489861	0.514748			0.462009	0.371556	0.37893	-0.0787708	-0.007332	0.0810263	0.116528	-0.030598	0.143734	0.0413656	0.258135	0.320843	0.144309	0.095903	0.584221	-0.207923	0.0866577	0.125799	0.346332	0.0190128					0.00276305	0.379725	0.0295512	-0.134656	0.0686663	0.00598798
-0.0373611	-0.453047	0.0403853	0.693751	-0.118546	0.322094	-0.0884139	0.339673	0.438903	0.111783	0.738516	0.331187	-0.105352	0.253703	0.0940786	0.316529	-0.0486457	0.518003			0.438667	0.383512	0.112278	-0.0711516	-0.0152759	0.0984914	0.0733945	-0.0768863	0.0120117	0.0424283	0.278508	0.302869	0.152013	0.129818	0.566937	-0.22374	0.0924105	0.114839	0.358526	0.0184986					0.00463517	0.417986	0.0285613	-0.137569	0.0652254	0.00580857
-0.0323596	-0.460562	0.0450352	0.693765	-0.12029	0.313883	-0.0887391	0.331758	0.459211	0.125603	0.83182	0.326656	-0.100139	0.21487	0.096977	0.327872	-0.0636489	0.519602			0.394814	0.377252	0.148569	-0.0684924	-0.0198661	0.104374	0.123746	-0.0818479	0.0305176	0.0332448	0.271842	0.288582	0.136053	0.124139	0.556316	-0.233917	0.0835505	0.108504	0.35441	0.017669					0.0129859	0.44831	0.0164196	-0.146614	0.0616923	0.00626445
-0.0337329	-0.454514	0.038658	0.685155	-0.1327	0.304236	-0.0788157	0.277861	0.451936	0.12104	0.846017	0.327668	-0.0448165	0.202143	0.0983891	0.340357	-0.0522475	0.520744			0.411833	0.379844	0.259027	-0.0731861	-0.0198456	0.0942335	0.208387	-0.115685	-0.0875925	0.0213677	0.245533	0.294433	0.127209	0.115986	0.552773	-0.212557	0.0690247	0.103447	0.346539	0.0183516					0.0311905	0.484189	0.01951	-0.159579	0.0587352	0.00557525
-0.0346534	-0.445245	0.0256489	0.662872	-0.132254	0.294084	-0.0633159	0.297473	0.415843	0.117984	0.862532	0.320198	-0.0269201	0.120612	0.103651	0.321766	-0.0670301	0.522326			0.411332	0.390413	0.209298	-0.0646388	-0.0217131	0.0905804	0.330881	-0.100408	0.0243167	0.0228944	0.240829	0.305982	0.10558	0.125057	0.539016	-0.245863	0.0731097	0.114099	0.344474	0.0219035					0.0539588	0.526562	0.0301569	-0.13732	0.0619759	0.00464881
-0.0405673	-0.439741	0.00455761	0.630961	-0.143987	0.280349	-0.0457302	0.315996	0.430893	0.132014	0.852297	0.314834	0.00163585	0.0213795	0.0733952	0.313617	-0.0510568	0.523919			0.432834	0.381861	0.432059	-0.0644893	-0.0446583	0.0844319	0.332881	-0.0460249	-0.0581419	0.00717805	0.195582	0.309579	0.104029	0.127963	0.536206	-0.241283	0.0814274	0.126552	0.326739	0.022508					0.0980175	0.557882	0.0437649	-0.121514	0.0620797	0.0119175
-0.0246365	-0.435649	-0.0102138	0.59223	-0.152451	0.265268	-0.0437598	0.322152	0.406512	0.140279	0.816219	0.310919	0.0205538	0.108608	0.0787275	0.336334	-0.06313	0.511157			0.369213	0.396927	0.421773	-0.0628161	-0.044436	0.0838894	0.273813	-0.0227925	-0.190392	0.0138508	0.175782	0.310307	0.119535	0.0833009	0.535888	-0.243856	0.0699798	0.120434	0.321292	0.0260013					0.113375	0.572782	0.0487106	-0.121671	0.0625953	0.0113533
0.025878	-0.417161	-0.00815263	0.547938	-0.159828	0.237549	-0.00506364	0.30851	0.401383	0.146303	0.836471	0.30571	0.0936509	0.0792407	0.0843067	0.334878	-0.0574367	0.509716			0.385906	0.389399	0.192036	-0.0589255	-0.0362936	0.0946374	0.22761	-0.0449375	-0.360773	0.0102169	0.159595	0.295681	0.133485	0.0709639	0.565997	-0.248023	0.0771585	0.132455	0.329691	0.0237181					0.125288	0.595579	0.0563114	-0.109547	0.0630258	0.0117112
0.0782469	-0.427108	-0.0168896	0.505228	-0.162451	0.218537	0.0359328	0.295316	0.413322	0.171048	0.813813	0.296002	0.0977933	0.172326	0.0913177	0.329143	-0.0633512	0.493785			0.393948	0.374493	-0.0459019	-0.0613091	-0.0208009	0.0815581	0.280518	-0.0458067	-0.370256	0.0185028	0.14008	0.283804	0.143789	0.0263622	0.569955	-0.214414	0.0758313	0.151035	0.34685	0.022485					0.14815	0.601776	0.0708203	-0.128241	0.0622139	0.0116733
0.0746284	-0.436381	-0.0259824	0.464847	-0.163283	0.197037	0.0714348	0.276172	0.423389	0.16388	0.889747	0.28443	0.156445	0.091287	0.0903443	0.342296	-0.0644229	0.479307			0.358415	0.367359	0.16716	-0.0634421	-0.0336206	0.0737353	0.360161	-0.0338758	-0.307862	0.0155671	0.111838	0.286325	0.138147	0.00233377	0.582815	-0.246858	0.0735995	0.157654	0.328694	0.0241577					0.16546	0.602804	0.0652185	-0.131014	0.0659658	0.00834779
0.112139	-0.440365	-0.0201232	0.428768	-0.165572	0.180244	0.108319	0.287108	0.3837	0.182455	0.869947	0.290692	0.188886	0.119768	0.096841	0.339956	-0.0623561	0.466313			0.338391	0.358228	0.164181	-0.0644675	-0.0299459	0.0703582	0.419035	-0.033078	-0.320128	0.0266092	0.0938421	0.313454	0.134288	0.0203141	0.647799	-0.27021	0.0728599	0.183858	0.342609	0.02484					0.189661	0.623297	0.0689206	-0.114167	0.0671308	0.0126677
0.154028	-0.442605	-0.00680511	0.397736	-0.166508	0.169759	0.112441	0.269757	0.411403	0.189332	0.886148	0.277619	0.19049	0.0954166	0.0856985	0.331611	-0.0485107	0.449313			0.322621	0.353066	-0.0992834	-0.0434967	-0.0222411	0.0718208	0.42143	0.0035736	-0.299867	0.0333278	0.0704457	0.331119	0.134953	0.0207432	0.645751	-0.273559	0.086602	0.198118	0.328737	0.0258441					0.202075	0.623164	0.0832602	-0.110944	0.067545	0.0135078
0.159266	-0.45765	0.00439306	0.387969	-0.158293	0.162822	0.0811053	0.252736	0.440677	0.195017	0.918351	0.278956	0.198315	0.0989706	0.0706539	0.335047	-0.0367457	0.43012			0.334364	0.343895	-0.0593665	-0.0401769	-0.0053598	0.0871327	0.345704	0.00172489	-0.227817	0.0417866	0.0592753	0.343472	0.136288	0.0386877	0.677286	-0.246446	0.0784117	0.187177	0.325292	0.0249234					0.20469	0.609089	0.0763214	-0.10942	0.0676899	0.0137619
0.16464	-0.468719	0.00865688	0.377448	-0.143205	0.16357	0.075861	0.231484	0.41953	0.16098	0.921145	0.277211	0.197593	0.153305	0.0711813	0.361519	-0.0505035	0.413967			0.313425	0.36416	-0.249851	-0.031211	0.0054572	0.101898	0.418515	-0.0210642	-0.258051	0.0403213	0.0390278	0.341269	0.119747	0.0443739	0.634763	-0.240748	0.0722733	0.177103	0.322879	0.0239721					0.158391	0.592134	0.0678239	-0.107547	0.0670408	0.00671184
0.118765	-0.481113	0.0156943	0.369988	-0.125766	0.166828	0.0864472	0.215088	0.424613	0.157225	0.947147	0.281262	0.197064	0.205054	0.0610211	0.359253	-0.050896	0.39619			0.326001	0.337074	-0.244038	-0.0267293	-0.00716765	0.0903568	0.559413	-0.11746	-0.16981	0.0509172	0.0408084	0.340104	0.108614	0.0683256	0.598246	-0.253262	0.0716959	0.185103	0.318857	0.0252131					0.167903	0.591048	0.0796831	-0.106418	0.0672272	0.00634376
0.0675492	-0.494535	0.00864146	0.377066	-0.114229	0.17617	0.0704672	0.244952	0.435234	0.120865	0.914359	0.284768	0.194384	0.274394	0.0509835	0.384276	-0.0506314	0.377312			0.304513	0.321303	-0.250139	-0.0179801	-0.0205802	0.0792207	0.703126	-0.0793134	-0.183634	0.0532185	0.0162299	0.353	0.100282	0.0578615	0.556879	-0.25595	0.0568714	0.197832	0.302363	0.0292671					0.181783	0.587397	0.0762233	-0.114339	0.070466	0.00582914
0.0146955	-0.50181	-0.00193095	0.42035	-0.106691	0.186245	0.0547749	0.282193	0.431217	0.0928851	0.904534	0.28441	0.181707	0.273451	0.0521322	0.38193	-0.039807	0.363294			0.292667	0.312394	-0.149945	0.00016773	-0.0237942	0.0712872	0.777133	-0.108966	-0.190117	0.0518957	0.00422136	0.370619	0.0913106	0.0761008	0.565688	-0.26225	0.0522198	0.197227	0.298021	0.0306353					0.197455	0.585461	0.0727102	-0.105597	0.0733471	0.00558937
0.0120599	-0.502857	-0.0199539	0.467846	-0.0981047	0.189118	0.0457004	0.275337	0.43227	0.115695	0.878312	0.294792	0.183224	0.276231	0.0639874	0.354558	-0.025439	0.345253			0.340257	0.297872	-0.346493	0.0141402	-0.00570155	0.0809788	0.886631	-0.0995585	-0.225214	0.0516657	0.023426	0.374083	0.0894217	0.0638089	0.593501	-0.243172	0.052163	0.206096	0.308181	0.032249					0.198455	0.595397	0.0828644	-0.117853	0.0812238	0.0036716
-0.0288345	-0.527195	-0.0108007	0.505521	-0.0914727	0.186903	0.0337859	0.25797	0.445973	0.0815901	0.861515	0.292409	0.179913	0.278054	0.0479506	0.330911	-0.018707	0.329707			0.32493	0.293337	-0.188522	0.0329872	-0.00395223	0.0907898	0.826168	0.0255916	-0.199043	0.047906	0.01908	0.368977	0.119656	0.0518154	0.587771	-0.244608	0.0566328	0.20363	0.303319	0.0323111					0.236823	0.580337	0.0780533	-0.129192	0.0969874	0.00180887
-0.0217755	-0.546362	-0.0132833	0.552369	-0.0858195	0.185666	0.0354877	0.292903	0.427939	0.068882	0.846265	0.3092	0.195588	0.356332	0.0485227	0.314268	-0.0433172	0.310323			0.295394	0.280711	0.0117334	0.041587	-0.0135806	0.104358	0.791422	0.0414955	-0.215355	0.037543	0.0148071	0.353287	0.114846	0.0406173	0.601259	-0.249377	0.0619983	0.21123	0.314721	0.0334788					0.254322	0.576978	0.0622553	-0.157599	0.1174	0.00132919
-0.0198028	-0.550797	0.00347506	0.590831	-0.0748796	0.179775	0.0476746	0.290662	0.421327	0.0404697	0.810049	0.314432	0.202502	0.373248	0.0480799	0.303467	-0.0584421	0.29502			0.321344	0.276127	0.00116441	0.052255	-0.0403977	0.0972133	0.779727	0.089956	-0.358336	0.0388947	0.00710379	0.33984	0.116679	0.00994601	0.594023	-0.288943	0.0583142	0.220366	0.310609	0.0328142					0.283532	0.581174	0.0577621	-0.165828	0.139627	0.00196024
-0.0261366	-0.554272	0.0120388	0.593074	-0.0603686	0.181263	0.0261182	0.292877	0.402201	0.0697437	0.776632	0.318776	0.204839	0.225519	0.0496809	0.269929	-0.0394994	0.281903			0.314831	0.260838	-0.0375999	0.0775872	-0.0379376	0.0525303	0.653728	0.105235	-0.316339	0.0471774	0.0147861	0.344471	0.119734	0.020684	0.579566	-0.324073	0.0657184	0.240298	0.320084	0.0339302					0.329321	0.578261	0.0541282	-0.172845	0.166711	0.00198695
0.0170911	-0.539471	0.0319173	0.632257	-0.0390813	0.178423	0.0341908	0.297544	0.419593	0.0509232	0.718228	0.322323	0.138618	0.264632	0.0479052	0.240664	-0.0195942	0.278375			0.35678	0.26419	-0.047613	0.105937	-0.0490666	0.0517	0.559162	0.142907	-0.400945	0.0351632	0.0149322	0.356359	0.130103	0.0229016	0.595498	-0.359581	0.0804174	0.23822	0.332978	0.0312342					0.391721	0.572403	0.0503888	-0.19832	0.199274	0.00331758
0.021885	-0.538688	0.0338141	0.661476	-0.00297633	0.182804	-0.0126002	0.312181	0.42754	0.0848506	0.693891	0.312719	0.130213	0.141282	0.0445003	0.199557	-0.027789	0.276731			0.372645	0.28355	-0.0287775	0.112834	-0.0533479	0.0626841	0.475666	0.12246	-0.187755	0.0250255	0.0149217	0.366268	0.142039	0.0360772	0.595289	-0.38998	0.0938081	0.234585	0.342686	0.0305838					0.39883	0.56375	0.0512044	-0.192815	0.235791	0.00540212
0.0731403	-0.540562	0.032643	0.671445	0.0454025	0.180048	-0.0142469	0.298904	0.457176	0.111466	0.668337	0.320157	0.133363	0.235172	0.0300877	0.198963	-0.021011	0.272428			0.387163	0.293371	-0.148407	0.110792	-0.0739615	0.0879336	0.324859	0.137276	-0.188119	0.0236603	0.0223014	0.371904	0.146986	0.0793226	0.674196	-0.42839	0.106054	0.230613	0.336103	0.0279321					0.385712	0.557794	0.0426915	-0.207708	0.270842	0.00469994
0.0833525	-0.548597	0.0350489	0.656451	0.0825925	0.186032	-0.0220802	0.3306	0.435488	0.119422	0.640841	0.307379	0.129987	0.154846	0.0531065	0.201857	-0.0296841	0.27093			0.400086	0.294894	-0.174532	0.1262	-0.0897307	0.0840039	0.169218	0.231494	-0.2083	0.0225762	-0.00186028	0.36487	0.164388	0.0879813	0.649009	-0.460701	0.120347	0.206372	0.331514	0.0286917					0.417586	0.537719	0.038961	-0.196159	0.306091	0.00464933
0.087702	-0.542034	0.00480226	0.640455	0.127716	0.200953	-0.0225266	0.396624	0.437597	0.115432	0.601578	0.306136	0.0601721	0.244779	0.0507551	0.209852	-0.0274532	0.271008			0.399458	0.296342	-0.296718	0.1405	-0.120046	0.0455008	0.0991773	0.173196	-0.173487	0.022147	0.00896081	0.370676	0.141428	0.104739	0.595645	-0.484282	0.125373	0.181978	0.337899	0.0300138					0.368163	0.528743	0.0406224	-0.18972	0.33851	0.00224937
0.0379385	-0.543554	-0.00594488	0.618131	0.170577	0.204989	-0.00445678	0.397068	0.443779	0.125713	0.578397	0.301629	0.0479327	0.110791	0.0481855	0.207756	-0.0157749	0.27345			0.442532	0.297644	-0.45261	0.14018	-0.132317	0.023762	0.0869954	0.158297	-0.173773	0.0273116	0.0183592	0.365411	0.161156	0.139437	0.642466	-0.525197	0.124158	0.157984	0.35009	0.0302148					0.38126	0.51641	0.0382272	-0.167091	0.367691	0.0102687
0.0366705	-0.541853	-0.0145143	0.590164	0.199996	0.219391	0.0141321	0.369927	0.458302	0.150311	0.548358	0.292653	0.0308826	0.0151977	0.0495142	0.20585	-0.0025479	0.276934			0.440928	0.288815	-0.47209	0.146693	-0.129412	0.0261711	0.182836	0.120888	-0.167719	0.0209984	0.0179599	0.38049	0.164121	0.162114	0.676556	-0.526119	0.126384	0.157483	0.372836	0.032542					0.357388	0.496656	0.0421195	-0.171064	0.392162	0.00940927
0.0379734	-0.530273	-0.0102496	0.599974	0.220377	0.217286	0.0199067	0.338163	0.484162	0.122064	0.525933	0.286644	0.0272045	0.0251283	0.0450301	0.221546	-0.0100896	0.277056			0.468141	0.285481	-0.44968	0.139815	-0.155496	0.0377618	0.231252	0.166991	-0.0688986	0.00918619	0.0214377	0.383658	0.166249	0.132759	0.721881	-0.520346	0.131128	0.133797	0.381402	0.0320619					0.321852	0.488944	0.0427477	-0.181966	0.41411	0.00968867
0.0443335	-0.531431	-0.0251602	0.581879	0.225082	0.222517	0.0259129	0.332922	0.450982	0.126288	0.537934	0.274255	0.0256016	-0.0958159	0.0445862	0.218876	-0.0169353	0.268301			0.476258	0.275651	-0.342251	0.136215	-0.164292	0.0580674	0.261525	0.179731	-0.0535563	0.0105667	0.0041983	0.382283	0.145034	0.12122	0.761237	-0.511371	0.126119	0.1335	0.376049	0.0330603					0.27723	0.486853	0.0388257	-0.189163	0.428304	0.00789451
0.0469679	-0.5349	-0.0248177	0.568791	0.222622	0.220362	0.0936411	0.285688	0.429991	0.129595	0.551097	0.279606	0.0258095	-0.114961	0.0415095	0.218108	-0.0013632	0.261768			0.498865	0.258357	-0.316393	0.140998	-0.178907	0.0662438	0.369765	0.194312	-0.234902	0.00907479	-0.00297517	0.364997	0.129454	0.112369	0.812649	-0.522012	0.102164	0.131061	0.385477	0.0321338					0.290237	0.473005	0.0330912	-0.207036	0.437298	0.0102519
0.000892013	-0.533497	-0.015239	0.543001	0.216008	0.223389	0.0992907	0.262851	0.391414	0.137649	0.556761	0.285648	-0.0351464	-0.18978	0.0439571	0.220937	-0.00181525	0.254474			0.475637	0.254239	-0.249021	0.153248	-0.183424	0.0507325	0.522025	0.232478	-0.212806	0.0112476	-0.00715751	0.345876	0.129575	0.0989932	0.770349	-0.504861	0.0861304	0.126132	0.394885	0.0352152					0.315067	0.464093	0.0301811	-0.209114	0.447488	0.0108582
0.0387341	-0.528333	-0.0075675	0.527058	0.21415	0.22975	0.12984	0.235613	0.417472	0.117812	0.558538	0.28112	-0.0360923	-0.19044	0.00800378	0.213568	-0.00231425	0.249343			0.458358	0.240682	-0.26198	0.149296	-0.18265	0.0498318	0.600758	0.138887	-0.191481	0.0108363	-0.00713978	0.353128	0.118882	0.130247	0.805232	-0.481337	0.0723826	0.142341	0.390956	0.0344116					0.30014	0.44809	0.027573	-0.22934	0.449478	0.0111771
0.0321234	-0.521524	-0.0141116	0.544817	0.217946	0.223236	0.142525	0.198982	0.412914	0.137275	0.56448	0.276629	-0.0324605	-0.258331	0.0111922	0.205248	-0.000454613	0.24254			0.458492	0.23579	-0.330813	0.139896	-0.164229	0.0429345	0.640534	0.113792	-0.215238	0.0104598	-0.00694838	0.348061	0.112271	0.112811	0.846037	-0.452905	0.0625968	0.160367	0.375968	0.033233					0.323078	0.436712	0.0277524	-0.242843	0.447901	0.0111259
0.0348308	-0.500731	-0.0257111	0.570194	0.202254	0.233028	0.129456	0.191598	0.361794	0.115899	0.553445	0.271779	-0.0952982	-0.102404	0.0118352	0.194106	-0.00735159	0.236778			0.459329	0.220673	-0.340555	0.141382	-0.164143	0.0452311	0.697023	0.154726	-0.174816	0.00511445	-0.0192192	0.351476	0.104233	0.10291	0.835493	-0.412891	0.0612851	0.178256	0.368461	0.0310271					0.356595	0.427095	0.029762	-0.2569	0.448309	0.00151855
0.0384015	-0.49844	-0.0591259	0.603509	0.198089	0.233441	0.11011	0.216141	0.382274	0.113018	0.558624	0.267108	-0.0993292	-0.0930763	0.0085023	0.196534	-0.013174	0.232647			0.457295	0.21976	-0.329921	0.140028	-0.151613	0.0341225	0.61564	0.196773	-0.180276	0.00858642	-0.0236478	0.342135	0.0994762	0.107896	0.816297	-0.390101	0.0612587	0.173165	0.365981	0.0295445					0.3785	0.418674	0.024304	-0.255664	0.444755	0.0062526
0.0417154	-0.485047	-0.0834268	0.630173	0.190318	0.241698	0.126524	0.264576	0.394154	0.146825	0.557569	0.25938	-0.158451	-0.0123315	0.00588406	0.17309	-0.0154232	0.23098			0.457781	0.222297	-0.328234	0.138963	-0.145583	0.034225	0.57299	0.16755	-0.229346	0.0184743	-0.0470938	0.339703	0.0911994	0.105487	0.820432	-0.354137	0.0581211	0.189863	0.365629	0.0314795					0.460756	0.402578	0.0275489	-0.243341	0.442017	0.00619822
-0.0075209	-0.48125	-0.110951	0.64614	0.195139	0.251532	0.128106	0.251053	0.406904	0.165564	0.563237	0.259143	-0.102875	0.0459254	0.0470333	0.16501	-0.0306336	0.232137			0.403362	0.227624	-0.411908	0.140469	-0.130493	0.0242773	0.540919	0.135276	-0.281245	0.0296618	-0.0548366	0.335648	0.0882254	0.108912	0.781598	-0.323076	0.0561346	0.184482	0.377716	0.0338416					0.469548	0.376549	0.0376365	-0.222911	0.436456	0.0166786
-0.00853326	-0.470126	-0.132317	0.66462	0.200299	0.259441	0.116626	0.231018	0.409892	0.137243	0.530382	0.254394	-0.155632	0.127846	0.0840784	0.164262	-0.0163441	0.233202			0.380574	0.226149	-0.4168	0.143717	-0.114942	0.0112533	0.487138	0.110003	-0.298169	0.0372233	-0.0595929	0.343606	0.0868448	0.106508	0.780415	-0.274066	0.0826676	0.180582	0.362774	0.032918					0.530272	0.359516	0.0496312	-0.211578	0.428866	0.0132105
-0.000728014	-0.45415	-0.153396	0.684195	0.198968	0.26237	0.112104	0.243246	0.408463	0.105531	0.506074	0.226719	-0.151589	0.0765032	0.0829644	0.173514	-0.0250326	0.232477			0.387475	0.221759	-0.494992	0.145263	-0.108845	0.0130179	0.410229	0.0735626	-0.301447	0.0311468	-0.065651	0.365918	0.0823808	0.0671468	0.763434	-0.255884	0.0831604	0.18008	0.361776	0.0318545					0.588631	0.336145	0.068275	-0.210948	0.422125	0.0126855
-0.0372012	-0.449797	-0.174939	0.716524	0.195222	0.25974	0.0753514	0.279962	0.398304	0.112529	0.493385	0.217195	-0.204115	0.172353	0.0764695	0.17489	0.0135985	0.230747			0.413578	0.221956	-0.480229	0.143569	-0.0984255	0.014094	0.474016	0.102792	-0.298646	0.0311114	-0.061441	0.36667	0.0778127	0.0443116	0.749576	-0.246356	0.0816539	0.181676	0.372382	0.0294883					0.635862	0.321678	0.0692955	-0.201038	0.41725	0.0124641
-0.0213992	-0.439905	-0.185185	0.732862	0.182996	0.259607	0.0774547	0.252788	0.384024	0.0995628	0.502257	0.210088	-0.200351	0.153049	0.0662305	0.167967	0.0144359	0.224042			0.422245	0.230248	-0.287704	0.148857	-0.10823	0.0636517	0.580624	0.102868	-0.102201	0.0288732	-0.0674529	0.323412	0.0818294	0.0317947	0.703822	-0.220059	0.08127	0.183473	0.382709	0.0301174					0.677886	0.301351	0.0674779	-0.209966	0.415433	0.0129116
-0.00906339	-0.439325	-0.193394	0.739256	0.186402	0.256218	0.0846689	0.252039	0.410103	0.0930409	0.500266	0.197592	-0.19109	0.085998	0.0614108	0.162736	0.00902206	0.224609			0.392793	0.236436	-0.189459	0.148355	-0.116954	0.0745197	0.527432	0.0811368	-0.145687	0.0344872	-0.0664527	0.289319	0.0762961	0.0308475	0.696633	-0.210979	0.0866165	0.186008	0.36579	0.0304964					0.683094	0.28414	0.070269	-0.201429	0.407968	0.0146903
-0.00552549	-0.414644	-0.18404	0.733812	0.186333	0.25582	0.0818528	0.246808	0.350057	0.0747675	0.4942	0.183357	-0.207668	0.0856527	0.059892	0.150922	0.0112268	0.22162			0.354384	0.234084	-0.185259	0.142298	-0.125788	0.0969989	0.574894	0.055788	0.0651013	0.0350614	-0.0746179	0.257101	0.0739225	0.0272221	0.708441	-0.202293	0.0921555	0.185541	0.349528	0.0321393					0.7216	0.269714	0.0666977	-0.207643	0.399477	0.0102809
0.0426532	-0.445774	-0.153721	0.726665	0.189267	0.244488	0.0556936	0.218455	0.31084	0.0757142	0.502304	0.168579	-0.209111	0.000821035	0.0572218	0.145984	0.015714	0.219054			0.321028	0.232959	-0.192013	0.146525	-0.115356	0.138389	0.639964	0.0748385	-0.00274326	0.0395775	-0.0642365	0.235693	0.0880906	0.0167018	0.682529	-0.213096	0.100549	0.185704	0.344872	0.0327667					0.692077	0.262926	0.0598572	-0.212581	0.390823	0.0107558
0.0894181	-0.43468	-0.146614	0.708812	0.18174	0.230853	0.0277218	0.22789	0.330307	0.0542864	0.500643	0.149686	-0.218662	0.102067	0.00978411	0.147543	0.0211145	0.217652			0.334497	0.237463	-0.191877	0.152663	-0.110691	0.126324	0.540654	0.0705586	0.0456557	0.0215321	-0.0402023	0.219453	0.0962639	0.0323299	0.787927	-0.217059	0.106447	0.189228	0.340936	0.029772					0.73139	0.254081	0.0424309	-0.224822	0.386192	0.00204333
0.133681	-0.425426	-0.147783	0.68947	0.166881	0.224743	0.00909727	0.230673	0.375907	0.0747232	0.497319	0.138729	-0.217447	0.0475375	-0.0274014	0.15061	-0.00222403	0.216411			0.31603	0.236224	-0.241394	0.148041	-0.112844	0.122727	0.3741	0.0835886	0.0261643	0.0158877	-0.0220007	0.238753	0.102868	0.0391191	0.772825	-0.254528	0.0996529	0.173414	0.336562	0.0326014					0.724517	0.238086	0.0262456	-0.23739	0.379585	0.00342889
0.136773	-0.464537	-0.116549	0.664338	0.154109	0.219497	-0.0141308	0.198772	0.400007	0.0939477	0.498264	0.135084	-0.221945	0.0738033	-0.0289535	0.12748	-0.0068831	0.218423			0.33454	0.254905	-0.223631	0.154751	-0.107785	0.142133	0.323873	0.105276	-0.0210569	0.0179016	-0.0415011	0.245989	0.111786	0.0729971	0.765567	-0.243965	0.0925439	0.18144	0.330555	0.0332317					0.743826	0.231426	0.0229984	-0.251797	0.371599	0.00390506
0.139106	-0.459151	-0.117651	0.624508	0.151922	0.214571	-0.010835	0.162583	0.382251	0.0771625	0.516695	0.13129	-0.169005	0.0622322	-0.0278151	0.121056	-0.0347917	0.220452			0.299351	0.26512	-0.21813	0.158837	-0.122969	0.133782	0.0859338	0.060278	-0.00415267	0.0156335	-0.0404963	0.257557	0.131687	0.0864508	0.766328	-0.234575	0.0922029	0.189315	0.313563	0.0352537					0.77541	0.219192	0.0234006	-0.268238	0.366808	0.00620325
0.129862	-0.488922	-0.0805674	0.565164	0.156263	0.213444	-0.027842	0.150926	0.379266	0.0711724	0.507195	0.12414	-0.176514	0.11976	-0.0195628	0.124517	-0.0370229	0.226833			0.30839	0.270826	-0.377985	0.144003	-0.117855	0.102248	-0.114599	0.021703	-0.254395	0.0192787	-0.0405185	0.272	0.136276	0.115536	0.806449	-0.229505	0.0877791	0.193259	0.312367	0.0353659					0.782615	0.211131	0.0307292	-0.26166	0.361681	0.00487068
0.124046	-0.490571	-0.0690168	0.509108	0.166693	0.202099	-0.0874537	0.1358	0.340422	0.104455	0.509311	0.116604	-0.176307	0.14863	-0.0112583	0.130179	-0.0359717	0.227642			0.294467	0.269935	-0.461568	0.134508	-0.0922367	0.0861494	-0.265056	0.00849293	-0.0760471	0.0241306	-0.0297563	0.291653	0.131876	0.105235	0.800497	-0.222791	0.0538005	0.202433	0.321946	0.0370589					0.787513	0.204064	0.0327324	-0.258701	0.356433	0.00333996
0.125706	-0.543199	-0.0361593	0.462252	0.166163	0.191211	-0.119144	0.150626	0.387129	0.123462	0.530369	0.114306	-0.211654	0.139489	-0.00458254	0.133172	-0.0307234	0.225552			0.298877	0.266556	-0.414086	0.140406	-0.0911771	0.0453004	-0.457145	0.00834525	-0.331639	0.0213433	-0.0235184	0.315494	0.136689	0.0991782	0.804725	-0.190059	0.049967	0.209117	0.330609	0.0347806					0.791654	0.192234	0.0344184	-0.249673	0.354143	0.00429179
0.0903499	-0.521706	-0.0607114	0.425644	0.155672	0.194081	-0.0881265	0.163922	0.413532	0.0882539	0.527988	0.11326	-0.212152	0.183631	0.00458841	0.148608	-0.0420559	0.227064			0.282474	0.257632	-0.352056	0.135742	-0.0889667	0.00441641	-0.549287	0.0354464	-0.209961	0.0139544	-0.0180612	0.329842	0.128014	0.108926	0.837187	-0.160566	0.0327152	0.212941	0.327304	0.0336961					0.799209	0.184197	0.034569	-0.250096	0.350301	0.0139425
0.123822	-0.532181	-0.0539323	0.410078	0.151687	0.194104	-0.110099	0.141417	0.42054	0.101988	0.540991	0.106087	-0.256799	-0.0104028	0.0197033	0.151456	-0.0425279	0.225672			0.269465	0.257936	-0.342416	0.121545	-0.0816798	0.000363466	-0.531066	0.104969	-0.121568	0.0360663	-0.0156952	0.348971	0.148793	0.106406	0.779074	-0.114635	0.0150063	0.210392	0.334672	0.0356196					0.78107	0.176675	0.0363813	-0.239514	0.342447	0.0134336
0.0949027	-0.546486	-0.0418394	0.400091	0.148853	0.186219	-0.118493	0.154712	0.376287	0.101008	0.542128	0.0878355	-0.26589	0.0288253	0.0255228	0.15157	-0.0425882	0.219062			0.266646	0.260274	-0.298982	0.112263	-0.0786339	0.00183372	-0.498868	0.164178	0.00368608	0.0430197	-0.0221964	0.328244	0.153462	0.100313	0.77866	-0.0463092	0.0121363	0.228154	0.343437	0.0329507					0.751916	0.182881	0.0440041	-0.225281	0.342412	0.0118315
0.10134	-0.538027	-0.0316687	0.395058	0.148417	0.177633	-0.105523	0.200196	0.361996	0.101062	0.559228	0.0755164	-0.257602	0.0148489	0.0540468	0.147263	-0.0387195	0.217386			0.249971	0.244132	-0.258292	0.109386	-0.0977664	-0.0322564	-0.542682	0.214291	-0.00880753	0.0470938	-0.00159276	0.285395	0.146299	0.0788939	0.802291	-0.0131127	0.0235109	0.221598	0.340744	0.0336311					0.710401	0.17241	0.0330833	-0.217755	0.340321	0.0121291
0.104453	-0.546741	-0.0186803	0.400342	0.133134	0.170995	-0.134832	0.187521	0.382087	0.113253	0.540362	0.0582267	-0.310806	0.0384279	0.0444098	0.156107	-0.0408023	0.21456			0.242147	0.237781	-0.176458	0.104906	-0.0878381	-0.0434342	-0.473966	0.269647	0.0318529	0.0504367	0.0152408	0.249184	0.13035	0.0695763	0.811461	0.0421937	0.0348608	0.211505	0.362922	0.0309317					0.720895	0.166319	0.0288294	-0.217396	0.333836	0.0102529
0.115334	-0.505035	-0.0441744	0.420043	0.109527	0.167894	-0.164167	0.21745	0.40541	0.128174	0.547025	0.0476983	-0.253811	0.00672985	0.0298261	0.149931	-0.0378816	0.209647			0.235663	0.235417	-0.176715	0.105921	-0.084077	-0.0505598	-0.328226	0.284336	0.153844	0.0465538	0.0243906	0.26265	0.129948	0.079136	0.80632	0.0360727	0.0411904	0.203913	0.360064	0.0312449					0.740163	0.158804	0.0153509	-0.22655	0.327037	0.0110242
0.127472	-0.511347	-0.0562485	0.440769	0.0785616	0.166282	-0.163426	0.210979	0.391118	0.0953553	0.566048	0.0330778	-0.25483	-0.0766839	0.0361952	0.147112	-0.0352939	0.20227			0.249207	0.247132	-0.199811	0.105764	-0.0962172	-0.018473	-0.179496	0.349996	0.10175	0.037947	0.0162119	0.255683	0.148844	0.117219	0.81421	0.0740812	0.0668263	0.188031	0.358157	0.0331771					0.757343	0.155483	0.0131049	-0.241998	0.323618	0.0107649
0.137925	-0.501769	-0.108794	0.459282	0.0521733	0.164532	-0.125034	0.173795	0.347163	0.0820535	0.548635	0.0259305	-0.198297	-0.123207	0.0504122	0.142377	-0.0181804	0.201004			0.266646	0.250249	-0.180086	0.105633	-0.0908752	-0.0148315	-0.12903	0.36941	0.225198	0.0380403	-0.000796689	0.243169	0.145442	0.110214	0.799976	0.073089	0.0630485	0.175494	0.35446	0.035219					0.728046	0.152557	0.0162039	-0.261948	0.319303	0.0104365
0.146648	-0.524023	-0.134135	0.474001	0.0414629	0.157004	-0.15314	0.164658	0.350951	0.0992664	0.567071	0.0203478	-0.148803	-0.132818	0.0337562	0.126973	0.0114668	0.195881			0.278111	0.258317	-0.170182	0.115567	-0.103314	0.00137557	-0.0993189	0.314753	0.181736	0.0514898	-0.000991922	0.227853	0.161181	0.121114	0.78223	0.103667	0.0583186	0.162153	0.350461	0.0386591					0.733784	0.144786	0.0149147	-0.265282	0.316911	0.00131285
0.0901464	-0.539864	-0.152326	0.479905	0.0257918	0.159473	-0.123924	0.191226	0.315144	0.0798135	0.583288	0.026297	-0.121303	-0.110375	0.0443772	0.12855	0.115459	0.190648			0.288012	0.253645	-0.198113	0.115448	-0.119707	0.0049647	-0.0686515	0.329353	0.12711	0.0471408	-0.013327	0.198772	0.141857	0.108061	0.738518	0.0777279	0.0738569	0.154207	0.341366	0.039072					0.771353	0.136528	0.0169237	-0.279445	0.313717	0.00308699
0.101156	-0.555265	-0.18245	0.481418	0.0195796	0.167281	-0.14008	0.185365	0.330236	0.0780573	0.614261	0.0351293	-0.120797	-0.0227246	0.0585543	0.129503	0.169829	0.193833			0.312114	0.248812	-0.25417	0.12239	-0.119467	0.0260578	-0.0288302	0.264043	0.0759242	0.0474511	-0.0207445	0.183088	0.156132	0.110667	0.763466	0.0395943	0.0712834	0.144895	0.340869	0.0411251					0.78367	0.126016	0.012083	-0.294601	0.308931	0.00263193
0.123196	-0.553969	-0.242207	0.485296	0.0129221	0.184365	-0.155014	0.139512	0.323659	0.0748703	0.630018	0.0348174	-0.127778	0.0492749	0.0534823	0.147697	0.177385	0.187465			0.326821	0.24976	-0.238352	0.115581	-0.0964931	0.0240366	-0.0199641	0.251525	0.21133	0.0414222	-0.0185796	0.197567	0.168864	0.0961729	0.751878	0.0535922	0.0641942	0.133948	0.340389	0.0384285					0.765917	0.125249	0.00909491	-0.284531	0.301514	0.00247069
0.154073	-0.546601	-0.302199	0.49235	0.016536	0.196039	-0.160424	0.17464	0.33769	0.0542244	0.641738	0.0413129	-0.0789633	0.0330149	0.0832627	0.144689	0.169825	0.183306			0.338702	0.243015	-0.265305	0.126676	-0.0972051	0.0638583	-0.0131396	0.290015	0.206999	0.0422864	-0.0343749	0.214728	0.176774	0.124519	0.701817	0.0306209	0.064233	0.126045	0.326368	0.0417341					0.703919	0.121534	0.0122242	-0.2681	0.300073	0.00458413
0.186018	-0.567036	-0.363748	0.481025	0.027956	0.208621	-0.16456	0.153167	0.329785	0.0552656	0.623845	0.0408402	-0.135054	0.0460891	0.114233	0.152918	0.172867	0.176204			0.341551	0.219165	-0.242821	0.149721	-0.0973476	0.0739998	-0.0498992	0.271257	0.192904	0.0482931	-0.0477062	0.206524	0.178858	0.101124	0.693855	0.0774149	0.0539468	0.116359	0.322998	0.0415146					0.670577	0.12063	0.0198906	-0.252993	0.29447	0.00849962
0.217739	-0.520936	-0.4057	0.468705	0.0489142	0.233485	-0.131445	0.176054	0.394002	0.0530464	0.611491	0.0484991	-0.138305	0.0239472	0.119469	0.167164	0.188452	0.172381			0.349381	0.212385	-0.248118	0.164568	-0.103169	0.0482134	-0.112889	0.246927	0.118857	0.0597937	-0.0414949	0.226428	0.174143	0.0803293	0.674413	0.0691574	0.0554738	0.109323	0.319588	0.0389942					0.634546	0.119283	0.0142604	-0.257297	0.287412	0.0117861
0.24435	-0.4399	-0.432862	0.45268	0.0761906	0.225276	-0.180496	0.175971	0.392067	0.0606961	0.587918	0.0504886	-0.167064	-0.0240768	0.10744	0.170934	0.165336	0.167926			0.318086	0.221996	-0.269146	0.190297	-0.11566	0.0601222	-0.08708	0.217628	0.106412	0.0689063	-0.0254986	0.234281	0.174852	0.071472	0.713312	0.049961	0.0453403	0.101943	0.320722	0.0402343					0.650839	0.118202	0.0123613	-0.233877	0.278614	0.0106959
0.265793	-0.374753	-0.463617	0.440021	0.104696	0.220233	-0.203758	0.136084	0.370141	0.0546867	0.551596	0.0552522	-0.161755	0.0472165	0.107916	0.194238	0.132938	0.166365			0.360989	0.205969	-0.335448	0.195282	-0.110178	0.0534082	-0.0618157	0.201013	0.0884917	0.0556509	-0.0327711	0.260352	0.159791	0.0386115	0.734092	0.0186194	0.0529998	0.0953674	0.335115	0.0365506					0.733701	0.113988	0.0139915	-0.225391	0.270342	0.00975466
0.291415	-0.3178	-0.502882	0.417514	0.118986	0.207104	-0.188281	0.136226	0.379111	0.0685797	0.498596	0.054864	-0.19024	0.0720432	0.101904	0.198305	0.0317846	0.163695			0.514778	0.200011	-0.343275	0.224834	-0.100413	0.0592791	0.00781371	0.162671	0.114797	0.0487848	-0.0374176	0.27704	0.163779	0.0485129	0.782802	0.0522037	0.0381436	0.0891448	0.341421	0.0353637					0.698488	0.112349	0.0154901	-0.201857	0.268293	0.00963141
0.314565	-0.256063	-0.537706	0.394817	0.139485	0.191612	-0.198596	0.15166	0.343461	0.0656927	0.48337	0.0582902	-0.159933	-0.00136392	0.0973215	0.212725	-0.0168225	0.16049			0.537155	0.201892	-0.249526	0.254641	-0.114769	0.0466294	0.0613295	0.143749	0.0977332	0.0440065	-0.0346107	0.297732	0.142644	0.0514441	0.726384	0.0896217	0.0413245	0.0829015	0.340069	0.0338696					0.671154	0.107674	0.0188088	-0.191812	0.261547	0.010504
0.334527	-0.198958	-0.580215	0.374326	0.146523	0.176828	-0.20898	0.186344	0.328359	0.0618583	0.462821	0.0649623	-0.125834	-0.07658	0.0885685	0.219421	0.0354563	0.163011			0.54455	0.210626	-0.269845	0.263807	-0.11755	0.0598791	0.0906942	0.145193	0.0749235	0.0494888	-0.0441409	0.288764	0.137296	0.0615257	0.697817	0.0712642	0.0414074	0.0763323	0.340328	0.0386509					0.674733	0.103589	0.0171477	-0.195243	0.256254	0.0155792
0.352245	-0.169231	-0.589146	0.347986	0.154587	0.15936	-0.157636	0.186593	0.256841	0.0976732	0.437678	0.0670247	-0.126991	-0.116339	0.0828188	0.223142	0.0430009	0.163664			0.578321	0.225907	-0.31756	0.276048	-0.126159	0.0242172	0.101658	0.0847655	0.0445855	0.0542934	-0.0464474	0.271802	0.125254	0.0497149	0.742215	0.0723573	0.0161253	0.0735548	0.340927	0.0354645					0.659341	0.102261	0.0178985	-0.180692	0.249358	0.0145707
0.363097	-0.119713	-0.597983	0.340946	0.174665	0.145661	-0.103964	0.202244	0.272108	0.072131	0.442591	0.0709073	-0.0747137	-0.0312821	0.0814944	0.22172	0.0420374	0.168628			0.557748	0.240795	-0.435956	0.271337	-0.143917	0.0217309	0.108722	0.0763294	-0.0657898	0.0460267	-0.0525582	0.277451	0.119743	0.0306216	0.747157	0.0659186	0.0286075	0.0677492	0.348871	0.0357892					0.6278	0.09911	0.0190934	-0.186878	0.239628	0.0109313
0.371309	-0.116206	-0.610329	0.342892	0.18543	0.12722	-0.0726989	0.203733	0.227975	0.0935447	0.406901	0.0724021	-0.0683672	0.114807	0.0766735	0.213054	0.0284276	0.172964			0.578159	0.238313	-0.373475	0.276652	-0.142557	0.00887521	0.0928046	0.0158512	-0.0430705	0.0420261	-0.0606422	0.278346	0.115343	0.0296786	0.771947	0.0412453	0.0167474	0.0646846	0.359944	0.0373442					0.615223	0.0881603	0.0209022	-0.174923	0.234205	0.00771151
0.378596	-0.153198	-0.626656	0.373956	0.176767	0.139026	0.01314	0.228533	0.247287	0.0873021	0.449456	0.0769801	-0.06191	0.186621	0.0833783	0.218344	0.0366445	0.17378			0.630573	0.223795	-0.394813	0.272787	-0.139954	0.00450775	0.0516821	0.0320713	-0.0705983	0.0410938	-0.0680052	0.264077	0.144588	0.0244594	0.769691	0.062181	0.0237784	0.0609102	0.356772	0.0355217					0.625808	0.0824876	0.0233727	-0.171703	0.23253	0.0082678
0.391185	-0.181618	-0.634837	0.411826	0.170753	0.15917	0.0886852	0.273699	0.244557	0.0943296	0.466891	0.0804568	-0.0844034	0.116847	0.107992	0.214469	0.0883203	0.172666			0.61832	0.233133	-0.341043	0.285705	-0.149562	0.0083894	0.0525714	0.0450756	-0.0577311	0.0463406	-0.072629	0.254071	0.141875	0.0378038	0.756711	0.0518689	0.0227152	0.0592892	0.337883	0.0372204					0.525742	0.0781057	0.0231667	-0.159579	0.226557	0.0118299
0.396064	-0.192495	-0.643017	0.449791	0.178756	0.184282	0.0654982	0.239727	0.244547	0.0899384	0.491763	0.0893141	-0.08061	0.0668947	0.105507	0.216973	0.119351	0.173496			0.502728	0.229683	-0.281789	0.278936	-0.158987	-0.000766347	-0.00724597	0.0932995	-0.0533738	0.0462503	-0.0751774	0.258271	0.136795	0.0306359	0.699565	0.0509139	0.0229212	0.0533876	0.322505	0.0384771					0.50483	0.0761926	0.020706	-0.170215	0.220677	0.0107431
0.400271	-0.205668	-0.643925	0.496965	0.174666	0.212178	0.1227	0.251561	0.246093	0.0938167	0.472454	0.0920354	-0.0748956	0.0815567	0.100179	0.212823	0.115209	0.171552			0.504532	0.225335	-0.359688	0.269908	-0.152721	-0.0087981	-0.0500072	0.118985	0.00638444	0.0634044	-0.0783641	0.249812	0.153937	0.00886801	0.757802	0.0585276	0.0255655	0.0478712	0.330591	0.0368677					0.48821	0.0743392	0.0174756	-0.174377	0.215409	0.0124864
0.395673	-0.226056	-0.642839	0.533883	0.18856	0.23946	0.165201	0.258469	0.292092	0.068795	0.481758	0.0908249	-0.0808581	0.127255	0.10215	0.197622	0.0585693	0.168374			0.492588	0.212745	-0.376868	0.279925	-0.156841	-0.0134699	0.0338342	0.117575	-0.00256691	0.0557275	-0.081434	0.270813	0.150498	0.00891022	0.815583	0.0696135	0.0369018	0.0452125	0.333419	0.037293					0.495197	0.0718478	0.0176897	-0.176145	0.212862	0.00716186
0.38294	-0.230895	-0.645182	0.57236	0.194386	0.27265	0.164745	0.219935	0.357776	0.0295382	0.484362	0.112284	-0.0947679	0.0553199	0.103662	0.199474	0.0759174	0.166771			0.482936	0.200499	-0.350651	0.263617	-0.157612	-0.00932872	0.0642984	0.116548	0.0905032	0.0486279	-0.0947064	0.294102	0.151025	-0.0312978	0.827155	0.0849172	0.0580419	0.0383254	0.329199	0.0354738					0.483945	0.0715165	0.012975	-0.184437	0.208194	0.00982305
0.3918	-0.251976	-0.649895	0.604367	0.181154	0.298893	0.155522	0.212264	0.342477	0.0292916	0.475908	0.126031	-0.109842	-0.113716	0.0942196	0.199079	0.0868176	0.161833			0.52713	0.186127	-0.20618	0.259359	-0.149714	5.71773e-05	0.115573	0.111533	0.191881	0.054276	-0.0969566	0.311077	0.154802	-0.01581	0.842489	0.0608879	0.0702457	0.0307832	0.326193	0.0335842					0.473206	0.0639456	0.00540872	-0.174859	0.206478	0.00975186
0.504055	-0.273544	-0.656444	0.627713	0.177282	0.323746	0.136241	0.175389	0.338386	0.00377077	0.478678	0.152136	-0.0704306	-0.203943	0.085312	0.206236	0.0946676	0.158256			0.502211	0.192738	-0.250108	0.26062	-0.140028	0.0138781	0.193071	0.0750316	0.211302	0.0555897	-0.100031	0.321674	0.15343	0.00159551	0.817206	0.0692497	0.0754973	0.0225952	0.312301	0.0320608					0.485489	0.0624535	0.00411013	-0.17466	0.202705	0.0101466
0.623163	-0.266686	-0.662007	0.611212	0.173938	0.349214	0.115818	0.180478	0.320351	-0.0197477	0.439059	0.193376	-0.0710176	-0.12849	0.086671	0.211966	0.0963562	0.157191			0.454494	0.196549	-0.236221	0.258691	-0.137801	0.0247117	0.275386	0.0722107	0.221857	0.0491814	-0.101716	0.336454	0.135195	0.03508	0.866612	0.0802828	0.0748397	0.0180864	0.310661	0.0324618					0.446966	0.0564168	-0.00404002	-0.18419	0.196231	0.0120226
0.738433	-0.274446	-0.664011	0.578549	0.169978	0.359047	0.0930179	0.181623	0.30279	-0.0287273	0.399703	0.241902	-0.0780627	0.0495958	0.0847968	0.202986	0.0839555	0.151719			0.45999	0.19133	-0.241265	0.24726	-0.138157	0.037344	0.309722	0.112251	0.188251	0.0516657	-0.110284	0.34511	0.140653	0.0339222	0.889965	0.129295	0.085454	0.010362	0.309724	0.0321592					0.430978	0.0535942	-0.00620939	-0.201105	0.192728	0.00862079
0.858317	-0.307593	-0.660994	0.575411	0.167301	0.373874	0.116444	0.214453	0.292121	-0.0288642	0.377577	0.293401	-0.0494521	0.135319	0.08344	0.199812	0.0591666	0.153393			0.424783	0.195138	-0.23641	0.240155	-0.137365	0.0373052	0.379079	0.0959471	0.0402287	0.0599753	-0.117761	0.344184	0.150825	0.0633182	0.922435	0.119095	0.0868755	0.0066834	0.310737	0.0301789					0.433751	0.0462505	-0.00266495	-0.196674	0.187053	0.0127079
0.861946	-0.335191	-0.659897	0.529205	0.166485	0.383631	0.107651	0.208839	0.293162	-0.0334288	0.371817	0.324303	-0.0519639	0.134823	0.0895945	0.184338	0.061957	0.152114			0.395876	0.201033	-0.307668	0.232326	-0.144951	0.028429	0.339083	0.0754564	0.0546606	0.0525531	-0.121051	0.349647	0.140517	0.0898338	0.96158	0.0981572	0.082907	0.0041495	0.297625	0.0335615					0.421149	0.0477282	-9.34454e-05	-0.180773	0.180125	0.0107828
0.981622	-0.350079	-0.665196	0.510843	0.16934	0.390343	0.104342	0.195428	0.23678	-0.00321923	0.321448	0.355606	-0.0795264	0.0793537	0.078616	0.177943	0.0855047	0.153139			0.379137	0.198282	-0.29115	0.23125	-0.147713	0.0123997	0.270065	0.0518711	0.0739483	0.0585382	-0.123361	0.366551	0.14502	0.0881257	0.917967	0.0836808	0.0755394	-0.00496266	0.284857	0.0296199					0.410308	0.0461555	-0.000134182	-0.156729	0.176706	0.0109652
1.11315	-0.373542	-0.667244	0.496642	0.156312	0.386557	0.0934464	0.228745	0.257288	-0.00491187	0.338017	0.370888	-0.0953403	0.179276	0.0764523	0.182879	0.0804638	0.153966			0.373985	0.204415	-0.295525	0.237805	-0.141104	0.00919129	0.234801	0.0700732	0.0322786	0.0603807	-0.118988	0.378771	0.151244	0.116756	0.892606	0.0824541	0.0727361	-0.0107773	0.2917	0.0320705					0.401303	0.0375535	-0.00134374	-0.14877	0.170241	0.00884011
1.22543	-0.375172	-0.662325	0.48516	0.149053	0.389967	0.0963497	0.199829	0.277358	-0.00835546	0.370207	0.390792	-0.107796	0.210961	0.0825425	0.208786	0.117053	0.158633			0.445168	0.221881	-0.323981	0.244009	-0.133748	-0.00389938	0.145984	0.133682	0.0634259	0.0584824	-0.123349	0.383236	0.143057	0.111312	0.869301	0.0911785	0.0654867	-0.01245	0.278836	0.0342699					0.415447	0.039406	0.00320557	-0.131636	0.164835	0.00961227
1.24476	-0.387625	-0.649692	0.451942	0.145857	0.385183	0.0982718	0.194889	0.257301	0.0144194	0.406557	0.393768	-0.123849	0.198314	0.0871692	0.194766	0.112281	0.16123			0.461415	0.220935	-0.433389	0.236707	-0.15777	-0.0218698	0.0414601	0.223552	-0.0244482	0.0631715	-0.124795	0.397707	0.140261	0.113143	0.951537	0.10578	0.0723655	-0.0136841	0.284631	0.035328					0.388191	0.0413688	0.0107788	-0.111357	0.158074	0.00941058
1.26422	-0.387662	-0.637952	0.455377	0.157014	0.379524	0.0904311	0.166211	0.251436	0.0465215	0.428924	0.414542	-0.155868	0.296278	0.0748705	0.196789	0.118628	0.163516			0.466454	0.231877	-0.418474	0.223854	-0.16635	-0.0349526	-0.0516721	0.242697	-0.0734253	0.0634685	-0.124911	0.409392	0.131882	0.109314	0.844308	0.122895	0.0720278	-0.012708	0.292735	0.0378295					0.373732	0.0435236	0.0109874	-0.103005	0.153206	0.00839052
1.28522	-0.368301	-0.635959	0.447802	0.161604	0.387333	0.0318803	0.131659	0.27268	0.0313064	0.426165	0.416836	-0.154847	0.0934365	0.0788371	0.196	0.0910818	0.16937			0.411747	0.22435	-0.436721	0.224587	-0.156856	-0.053802	-0.122067	0.153304	-0.0633472	0.0618088	-0.120135	0.411368	0.127558	0.136254	0.759725	0.0933892	0.0593491	-0.0101967	0.291436	0.0368493					0.359582	0.0378658	0.00880936	-0.0906824	0.148707	0.00672661
1.27428	-0.326718	-0.637135	0.412524	0.161767	0.384661	0.0231306	0.126273	0.282721	0.0152721	0.466459	0.412363	-0.19227	0.204661	0.0550859	0.18518	0.0867372	0.171679			0.430827	0.21119	-0.396026	0.216124	-0.14965	-0.0592236	-0.220813	0.107827	0.124705	0.0627567	-0.105578	0.431841	0.118901	0.13811	0.729918	0.0996311	0.0606799	-0.0119795	0.288244	0.0375759					0.333666	0.0379626	0.000301691	-0.0907016	0.146051	0.00412232
1.37958	-0.300114	-0.635906	0.422278	0.169047	0.377022	0.0270466	0.104184	0.292745	-0.0132301	0.481175	0.431818	-0.194469	0.307656	0.0426928	0.192736	0.0935126	0.174897			0.42005	0.198188	-0.254644	0.224586	-0.147151	-0.0584978	-0.225068	0.131356	0.0771911	0.060453	-0.107067	0.447189	0.118819	0.129524	0.671806	0.0875181	0.0636483	-0.0113082	0.285905	0.0386477					0.33471	0.0384394	-0.00452161	-0.0845458	0.142551	0.00501383
1.40033	-0.260765	-0.625198	0.387455	0.168376	0.364953	0.0073336	0.107064	0.316159	-0.0329502	0.517834	0.455029	-0.179545	0.325325	0.0386659	0.191135	0.109371	0.177838			0.418188	0.200996	-0.29246	0.216615	-0.143809	-0.0487032	-0.263161	0.160978	-0.0396036	0.0648232	-0.111578	0.431953	0.119817	0.136704	0.646844	0.102766	0.0665243	-0.0101644	0.284628	0.0367149					0.342162	0.0445586	0.00173656	-0.0891081	0.137199	0.00487722
1.41244	-0.218911	-0.602006	0.309733	0.180346	0.364311	-0.0144199	0.101123	0.275792	-0.0293668	0.517083	0.475807	-0.175925	0.304841	0.03972	0.17403	0.147299	0.177607			0.414644	0.207037	-0.309539	0.204523	-0.143875	-0.0520842	-0.267184	0.236657	-0.0278258	0.0749019	-0.114357	0.419612	0.12212	0.123022	0.67269	0.104949	0.0681368	-0.0116664	0.282877	0.0396706					0.353051	0.0579474	0.00186699	-0.0994619	0.13427	0.00377842
1.42342	-0.194125	-0.579656	0.286839	0.183771	0.352444	-0.0453907	0.102001	0.254469	-0.0210098	0.496204	0.478039	-0.158308	0.314016	0.0379558	0.142459	0.129294	0.175204			0.339706	0.18915	-0.283822	0.200566	-0.131973	-0.043586	-0.258157	0.188059	-0.0555738	0.0823118	-0.115752	0.41146	0.133767	0.14353	0.658474	0.112381	0.0636287	-0.0121605	0.299115	0.0391505					0.346943	0.0724632	-0.00618809	-0.104286	0.131327	0.00302679
1.30722	-0.159535	-0.570058	0.231993	0.175643	0.349516	-0.0430778	0.107329	0.284806	-0.0459484	0.476184	0.500372	-0.162229	0.503802	0.0350108	0.143079	0.174979	0.172872			0.313068	0.178421	-0.092783	0.204303	-0.113431	-0.0361825	-0.16558	0.0945637	-0.0627105	0.0842703	-0.108014	0.397721	0.132546	0.124069	0.584746	0.111502	0.0712442	-0.0145307	0.285882	0.0379997					0.323009	0.0893948	-0.0095576	-0.103269	0.128475	0.00349669
1.17001	-0.129311	-0.563608	0.214138	0.167715	0.349818	-0.0401825	0.087714	0.268783	-0.0407628	0.480672	0.479401	-0.163428	0.314711	0.0352644	0.137833	0.172667	0.171807			0.321641	0.164062	-0.035398	0.211651	-0.113795	-0.0422967	-0.0511555	0.0795518	0.0533695	0.0891562	-0.107579	0.427938	0.138398	0.094882	0.577899	0.0898534	0.0820133	-0.0181797	0.287876	0.0288722					0.328781	0.110513	-0.00703289	-0.0961724	0.127664	0.00780193
1.03888	-0.111219	-0.552306	0.149408	0.164008	0.32966	0.000654354	0.117465	0.235004	-0.0193022	0.520636	0.486341	-0.145396	0.393776	0.0259672	0.134234	0.226094	0.167163			0.336681	0.167709	0.0136733	0.205568	-0.121148	-0.0353732	0.0396157	0.101472	0.0848229	0.0806303	-0.107991	0.439647	0.14267	0.0532108	0.597299	0.11966	0.0821845	-0.021975	0.301901	0.0287598					0.334839	0.141234	-0.00757809	-0.0856286	0.125885	0.0119653
0.991721	-0.0966667	-0.537253	0.133318	0.164449	0.319526	0.0118571	0.0868089	0.256357	-0.0209332	0.495441	0.501313	-0.115518	0.26044	0.040832	0.136464	0.234799	0.161523			0.326519	0.17704	0.00775564	0.201238	-0.124208	-0.0190129	0.0804187	0.119749	0.0332971	0.0802747	-0.105299	0.444258	0.145476	0.0470035	0.626009	0.108327	0.088881	-0.0240997	0.313921	0.0300853					0.314328	0.181101	0.000548476	-0.0836358	0.121748	0.00977995
0.89252	-0.0752321	-0.524859	0.0591386	0.156256	0.308314	0.00628427	0.120905	0.260534	-0.0171981	0.499153	0.483276	-0.0970091	0.156293	0.0482808	0.135312	0.254642	0.159446			0.35282	0.181955	0.0139865	0.187089	-0.115696	-0.0101417	0.150722	0.137361	0.0596149	0.0792525	-0.105272	0.447375	0.140248	0.0410231	0.679296	0.138217	0.0804494	-0.026778	0.325778	0.027959					0.319668	0.21129	0.0049308	-0.104206	0.12374	0.00806284
0.874789	-0.0574142	-0.51521	0.00571287	0.156754	0.300666	0.0238317	0.0859516	0.258408	-0.0187144	0.448721	0.470875	-0.0902877	0.147206	0.0548495	0.145341	0.243509	0.154244			0.372896	0.176401	0.0914449	0.181493	-0.108686	-0.0114833	0.267692	0.110611	0.184596	0.0803616	-0.0929234	0.448808	0.134575	0.0223947	0.699131	0.127024	0.0796475	-0.0249396	0.334285	0.0294633					0.268828	0.23227	0.00226674	-0.128378	0.123002	0.00775547
0.859189	-0.0501066	-0.52072	-0.00685757	0.166799	0.297825	0.0133707	0.0602897	0.263556	-0.0203319	0.44062	0.44846	-0.0898328	0.151421	0.0560993	0.136635	0.216685	0.152569			0.300809	0.153503	0.102475	0.182543	-0.107963	-0.00760189	0.3081	-0.0118988	0.130662	0.0706273	-0.0932897	0.455017	0.128552	0.00909927	0.705956	0.0902933	0.0636557	-0.0219839	0.333508	0.0267747					0.253569	0.256131	0.00156953	-0.139742	0.12415	0.00691571
0.847519	-0.0476193	-0.533749	-0.0677594	0.176536	0.30233	0.0348498	0.0495457	0.258073	-0.0180482	0.436607	0.462693	-0.142073	0.177031	0.0573512	0.140973	0.210413	0.15126			0.280033	0.142744	-0.0168769	0.174103	-0.129793	-0.0103992	0.385996	-0.0447137	0.111768	0.0755345	-0.0928131	0.477969	0.115902	0.0261101	0.795604	0.0830182	0.0448891	-0.0210922	0.323385	0.0289813					0.246415	0.277261	0.000699626	-0.165669	0.12375	0.00620534
0.950476	-0.0329485	-0.543984	-0.0551495	0.183655	0.292476	-0.0112526	0.0911147	0.268816	-0.0154413	0.436103	0.456442	-0.137027	0.0165117	0.0660767	0.136763	0.177847	0.151683			0.284558	0.138585	-0.0887702	0.174597	-0.120635	0.00380328	0.327795	0.023351	0.192822	0.0708214	-0.0994582	0.487289	0.12671	0.0705388	0.817584	0.0814179	0.0181039	-0.0179023	0.33223	0.028376					0.255716	0.290152	-0.00663656	-0.191402	0.122425	0.0069837
0.940077	-0.0336107	-0.547941	-0.139013	0.185561	0.282566	-0.00506076	0.112027	0.294167	-0.0427857	0.4237	0.453181	-0.0876707	0.0787218	0.0788485	0.125114	0.184477	0.150028			0.275639	0.130344	-0.249854	0.160905	-0.124559	0.0265775	0.239465	0.0845209	0.119048	0.0732265	-0.106085	0.466475	0.118844	0.0910383	0.818334	0.0729035	0.00603487	-0.021402	0.323287	0.0327639					0.230986	0.305207	-0.00180955	-0.216004	0.121347	0.00412862
0.987617	-0.0271252	-0.496569	-0.108324	0.182991	0.289518	0.0160642	0.0683316	0.303222	-0.0275746	0.42483	0.426375	-0.0927771	0.0759974	0.08348	0.124898	0.144939	0.150934			0.311473	0.123193	-0.217706	0.148984	-0.116107	0.0352516	0.17563	0.0811238	0.106674	0.0804604	-0.107314	0.470218	0.11906	0.126711	0.824819	0.0481907	0.0155183	-0.0202899	0.313342	0.0293565					0.226059	0.307813	0.003086	-0.239725	0.12391	0.000762479
0.920819	-0.0248699	-0.500955	-0.11647	0.188695	0.285028	0.00872444	0.0755533	0.263192	-0.0173824	0.43791	0.399878	-0.0734577	0.0699509	0.0945042	0.122547	0.165163	0.153901			0.434782	0.120282	-0.195284	0.147684	-0.119437	0.0354696	0.15252	0.0799541	0.0958357	0.0768713	-0.122968	0.481907	0.120792	0.0921213	0.851192	0.0445294	0.0171579	-0.0151694	0.302888	0.0269134					0.233905	0.302458	0.000823358	-0.252009	0.124797	0.000612384
0.904467	-0.0199393	-0.500688	-0.0838459	0.191481	0.286721	-0.00331526	0.0389178	0.247071	-0.0138337	0.395289	0.418385	-0.0987794	0.0307706	0.0958177	0.117515	0.15128	0.154552			0.546109	0.110998	-0.203575	0.148679	-0.134521	0.023618	0.142586	0.0472141	0.0424859	0.0800964	-0.124228	0.477928	0.119902	0.0910499	0.768657	0.0315378	0.0188087	-0.0119491	0.296559	0.0261025					0.225983	0.304357	-0.00389915	-0.24832	0.123248	0.00124652
0.787178	-0.0231395	-0.504675	-0.0462938	0.184459	0.292132	-0.0280656	0.0536915	0.212127	0.0165706	0.444536	0.424965	-0.0952631	0.0810317	0.0954833	0.128728	0.143901	0.15435			0.567956	0.102822	-0.233737	0.145959	-0.148132	0.0226808	0.0616218	0.0248034	0.0122587	0.0821705	-0.137994	0.504122	0.117272	0.107069	0.789246	0.0476178	0.0142319	-0.00902742	0.303955	0.0261052					0.265426	0.298716	0.00272567	-0.251987	0.121787	0.00372211
0.664533	-0.015476	-0.499573	-0.00538783	0.173584	0.288566	-0.0110281	0.0485037	0.197128	0.0289969	0.449107	0.409533	-0.0931158	0.0980808	0.0918481	0.136551	0.137913	0.152038			0.570908	0.108288	-0.189985	0.141387	-0.152152	0.0196463	0.0640295	0.0967367	-0.00151258	0.0768538	-0.137645	0.520521	0.118175	0.118799	0.752648	0.0477902	0.00925687	-0.00705599	0.293115	0.0265575					0.245775	0.294746	0.00120542	-0.250939	0.120541	0.00470316
0.546984	0.00575717	-0.485923	0.0297872	0.163549	0.279019	-0.00518436	0.0460965	0.191311	0.0362449	0.460735	0.375849	-0.0468773	0.0496927	0.0873388	0.133086	0.129368	0.150407			0.570367	0.115992	-0.190251	0.1328	-0.145048	0.0203283	-0.163475	0.160908	-0.052079	0.068799	-0.139523	0.508923	0.130546	0.0950584	0.688597	0.050611	0.00367438	-0.00478237	0.29952	0.0239089					0.236312	0.28103	0.0127509	-0.251941	0.121247	0.00515176
0.429639	-0.0463528	-0.429959	0.0467182	0.148525	0.287143	0.0307842	-0.00526412	0.165724	0.0415216	0.46344	0.354989	-0.080421	0.0478908	0.117636	0.152856	0.154107	0.146666			0.615188	0.125977	-0.196013	0.118215	-0.157246	0.00325944	-0.074591	0.13456	-0.0945835	0.0670877	-0.133831	0.5079	0.129624	0.0398803	0.640887	0.0524576	0.0221052	-0.00246752	0.30852	0.0243358					0.257063	0.270652	0.0236255	-0.254523	0.124802	0.00392638
0.442854	-0.0922868	-0.371845	0.0988119	0.152365	0.292738	0.0481738	-0.011906	0.137578	0.0654507	0.479252	0.34047	-0.0966316	0.0130477	0.107305	0.157889	0.150426	0.145338			0.654054	0.130516	-0.162802	0.114066	-0.142252	-0.0154901	0.0437883	0.035958	-0.126594	0.0553925	-0.133755	0.506802	0.139746	0.0567944	0.720213	0.065615	0.0347268	0.00285356	0.318149	0.0231279					0.271602	0.261963	0.0184036	-0.253722	0.122992	0.0024324
0.391179	-0.0715759	-0.377385	0.102095	0.145375	0.294179	0.0556551	-0.0126451	0.16438	0.0275069	0.465147	0.333381	-0.113305	-0.049755	0.134914	0.175658	0.139587	0.143126			0.641025	0.141709	-0.325437	0.110554	-0.13691	-0.0313791	0.102301	0.0380437	-0.125855	0.0570581	-0.13713	0.505921	0.140244	0.0900905	0.681973	0.0648834	0.0294522	0.00919797	0.3242	0.02576					0.264279	0.249584	0.00993088	-0.256511	0.120746	0.00495167
0.393591	-0.0722497	-0.378138	0.109489	0.143466	0.303118	0.0224373	-0.00828488	0.158214	0.0546227	0.459386	0.31975	-0.141634	-0.0473165	0.137316	0.181888	0.118192	0.144059			0.506136	0.133492	-0.332116	0.111785	-0.141151	-0.0551501	0.214851	0.0497325	-0.146896	0.0521503	-0.135414	0.455569	0.129623	0.0836467	0.705693	0.085364	0.0074611	0.00956966	0.330992	0.0272602					0.261714	0.237051	0.00100958	-0.255705	0.118478	0.00678735
0.40297	-0.0680037	-0.378158	0.120489	0.135577	0.307373	0.0362775	-0.0191384	0.137036	0.0543076	0.480698	0.289487	-0.138908	-0.0101154	0.14065	0.204062	0.124949	0.146265			0.422515	0.1365	-0.338381	0.0940169	-0.144304	-0.0530767	0.255354	0.106197	-0.175101	0.050864	-0.139097	0.421545	0.146287	0.0956651	0.754384	0.0858318	0.00613069	0.0118887	0.334998	0.0278934					0.258949	0.219701	0.00736431	-0.261343	0.11722	0.00695109
0.40847	-0.0497293	-0.315894	0.135042	0.139893	0.313545	0.0631764	-0.0355535	0.139237	0.0544834	0.456297	0.258423	-0.136005	-0.0563767	0.17512	0.191893	0.151189	0.149429			0.417104	0.149698	-0.433523	0.0904958	-0.146772	-0.0457301	0.36673	0.129244	-0.240726	0.0408478	-0.13912	0.359641	0.150696	0.111833	0.815596	0.0691392	0.0098112	0.0159139	0.330117	0.0253014					0.210359	0.214333	0.00647208	-0.259053	0.118222	0.00648451
0.413631	-0.0342613	-0.311013	0.153775	0.130077	0.31593	0.0606581	-0.0370763	0.140019	0.0509198	0.436044	0.256485	-0.17539	-0.118946	0.178006	0.209465	0.153661	0.155227			0.468059	0.144593	-0.540833	0.0870431	-0.155778	-0.0497887	0.466863	0.0849327	-0.282694	0.0560081	-0.142503	0.307907	0.154295	0.141654	0.824721	0.106754	0.0202508	0.0176074	0.340861	0.0249307					0.226967	0.209509	0.00363728	-0.258959	0.117654	0.00651509
0.40946	-0.0356436	-0.251401	0.173927	0.130399	0.328161	0.038717	-0.0240628	0.107368	0.0749246	0.414889	0.256729	-0.189201	-0.0833939	0.183071	0.218935	0.158655	0.157931			0.457575	0.154335	-0.436605	0.102921	-0.175886	-0.060871	0.768479	0.105271	-0.200106	0.0663485	-0.134745	0.261003	0.155772	0.143794	0.88225	0.113175	0.037305	0.0195155	0.336109	0.0251664					0.209767	0.205683	-0.00511989	-0.256992	0.119849	0.00663816
0.400347	0.0221117	-0.24163	0.173558	0.135638	0.334454	0.0174741	-0.0106154	0.10301	0.0811788	0.382402	0.268677	-0.165729	-0.0863834	0.184254	0.2175	0.153335	0.162286			0.507595	0.147802	-0.346469	0.0982427	-0.180093	-0.0663233	0.775598	0.123076	-0.105234	0.0713188	-0.147827	0.215379	0.147924	0.144672	0.910151	0.0992937	0.0335216	0.0184963	0.328315	0.0226236					0.200312	0.20022	-0.0123352	-0.257975	0.118147	0.00613982
0.397439	0.0371179	-0.251999	0.141665	0.130147	0.340228	-0.0286482	-0.0116947	0.10951	0.0551511	0.384599	0.276261	-0.203483	-0.0811612	0.190928	0.228592	0.152409	0.165692			0.428143	0.140988	-0.210188	0.109962	-0.194489	-0.0615242	0.751624	0.125871	0.0099403	0.0753188	-0.143663	0.182383	0.136555	0.13017	0.866138	0.122043	0.026136	0.0226076	0.318912	0.024576					0.218314	0.184025	-0.0136673	-0.260348	0.124376	0.00576099
0.396663	0.000238192	-0.24522	0.169702	0.130903	0.341171	-0.0861118	-0.00145058	0.0979692	0.0622893	0.403524	0.267312	-0.202886	-0.0558554	0.156861	0.223033	0.163509	0.171529			0.440783	0.144787	-0.0546138	0.116854	-0.207905	-0.0510266	0.719647	0.171112	-0.0454575	0.0752342	-0.143951	0.134809	0.159123	0.0711061	0.905033	0.132917	0.028407	0.0216624	0.310973	0.0240647					0.210296	0.181618	-0.0108743	-0.25982	0.130478	0.00507995
0.403355	-0.0303726	-0.182957	0.162219	0.122003	0.340503	-0.0711861	-0.0108708	0.119501	0.0261685	0.342683	0.268239	-0.180198	-0.0852697	0.154432	0.232504	0.190007	0.170649			0.549937	0.14715	-0.196492	0.120707	-0.207697	-0.0346013	0.69544	0.117952	-0.0839149	0.0768677	-0.148848	0.136818	0.171677	0.0992766	0.844744	0.112238	0.0448356	0.0266657	0.306295	0.0238216					0.213144	0.182319	-0.0116929	-0.265865	0.134329	0.00252964
0.399208	-0.0562938	-0.131869	0.141361	0.11843	0.344764	-0.0950932	-0.00102822	0.136526	0.0283058	0.36908	0.285806	-0.186221	-0.114025	0.181058	0.225952	0.18681	0.168042			0.525514	0.149874	-0.270509	0.142442	-0.204111	-0.0362139	0.698255	0.125578	0.0350676	0.0776496	-0.139235	0.139953	0.174753	0.115378	0.862247	0.117111	0.0378823	0.0261484	0.299593	0.0228342					0.208298	0.176172	-0.0170628	-0.265644	0.139618	0.0129938
0.388822	-0.091429	-0.128894	0.103058	0.109706	0.349173	-0.1187	-0.0053822	0.142731	-0.00520399	0.393562	0.312351	-0.197406	-0.0959052	0.150738	0.225056	0.16085	0.16822			0.495368	0.137863	-0.261983	0.143634	-0.200652	-0.0354822	0.701589	0.130028	0.16531	0.0808691	-0.139373	0.151644	0.180874	0.112591	0.785193	0.116366	0.0326715	0.0243104	0.294358	0.0221771					0.236849	0.173201	-0.0344876	-0.265312	0.150527	0.0123428
0.38918	-0.130342	-0.0657346	0.0488278	0.111265	0.351433	-0.123764	0.0277539	0.1487	-0.00568716	0.394933	0.332063	-0.157059	-0.100903	0.150346	0.217947	0.155501	0.16806			0.514929	0.138833	-0.121294	0.149353	-0.189219	-0.0369283	0.653749	0.101564	0.300634	0.0841531	-0.132049	0.165847	0.188966	0.0756816	0.830367	0.0721658	0.0318553	0.0244296	0.288905	0.0239777					0.21888	0.162431	-0.0289735	-0.26628	0.166907	0.0114487
0.384994	-0.15542	-0.0626132	-0.0173722	0.0983643	0.345653	-0.120468	0.0088356	0.163266	-0.0354702	0.401444	0.353591	-0.190277	-0.139199	0.140877	0.231231	0.150852	0.169283			0.607466	0.138753	-0.0328116	0.156732	-0.172739	-0.0256107	0.619659	0.0336808	0.192786	0.0688008	-0.141004	0.17994	0.186284	0.0956847	0.784056	0.085714	0.0311336	0.0256819	0.283923	0.0242162					0.244591	0.156866	-0.030275	-0.269765	0.184579	0.0154347
0.393967	-0.172225	-0.0407753	-0.0604418	0.100316	0.340327	-0.113153	0.0187839	0.147316	-0.0135037	0.433234	0.341237	-0.184075	-0.0175898	0.108115	0.230821	0.126514	0.173718			0.549222	0.145211	-0.196394	0.167545	-0.177913	-0.0173225	0.665351	0.00635378	0.182061	0.0686281	-0.142035	0.18825	0.188825	0.139701	0.805493	0.0886024	0.0160372	0.0261044	0.282098	0.0278506					0.200686	0.15264	-0.030762	-0.266327	0.206927	0.0167432
0.393974	-0.164195	0.00272968	-0.0769784	0.100562	0.34139	-0.0995462	0.0111974	0.148764	-0.0148998	0.37905	0.33489	-0.148343	-0.00327093	0.102557	0.230985	0.132399	0.176612			0.696119	0.14947	-0.195382	0.171005	-0.177696	-0.0155095	0.676664	0.023673	0.11689	0.0750655	-0.147028	0.177751	0.194402	0.164812	0.804924	0.0535873	0.0226117	0.0230483	0.280801	0.0296446					0.187106	0.156086	-0.0256894	-0.269327	0.233399	0.0153154
0.391654	-0.157337	0.0403173	-0.15485	0.0995127	0.344927	-0.0538231	-0.00753754	0.163997	-0.0190194	0.358009	0.351928	-0.134429	-0.00194691	0.10384	0.232288	0.14737	0.182845			0.690306	0.134149	-0.251587	0.166683	-0.179048	0.0148067	0.797037	-0.00050684	0.147487	0.0823709	-0.152011	0.183	0.177617	0.197894	0.794192	0.0864051	0.0172249	0.0216582	0.280586	0.0313065					0.203794	0.153175	-0.0225662	-0.272203	0.261171	0.0158218
0.390173	-0.140095	0.0908101	-0.197036	0.0972236	0.339882	-0.0422669	-0.0158886	0.157617	-0.0191168	0.398981	0.362998	-0.145771	-0.038692	0.105643	0.229944	0.12589	0.190291			0.531564	0.134348	-0.0974843	0.157707	-0.174582	0.0170488	0.735939	0.0148844	0.250259	0.0863435	-0.155853	0.175238	0.167782	0.188876	0.864952	0.118264	0.0140656	0.0189727	0.279593	0.0336461					0.198495	0.137467	-0.0197118	-0.268416	0.292762	0.01685
0.392006	-0.128065	0.158191	-0.209837	0.0994444	0.338803	-0.0171281	-0.0362118	0.175953	-0.0181515	0.345864	0.340439	-0.145594	-0.0215414	0.0768931	0.224123	0.127724	0.199671			0.57953	0.13457	-0.0323057	0.152805	-0.163653	0.0230245	0.693581	-0.0888438	0.176087	0.0889392	-0.170806	0.18024	0.147747	0.15617	0.836557	0.169206	0.0286471	0.0208133	0.280917	0.0361713					0.196606	0.133636	-0.0191867	-0.274974	0.318184	0.0065368
0.395622	-0.118164	0.230819	-0.194962	0.0969554	0.331799	-0.00581561	-0.0306912	0.182881	-0.0121854	0.321751	0.325322	-0.126959	-0.0372515	0.0691693	0.224668	0.124067	0.200353			0.610456	0.135259	-0.0185994	0.165111	-0.152707	0.0203746	0.570697	-0.0994637	0.10726	0.0931058	-0.174054	0.191723	0.141251	0.161499	0.894978	0.204821	0.0325894	0.0219927	0.281325	0.0370958					0.171053	0.126036	-0.0166443	-0.277854	0.348168	0.00682688
0.399719	-0.111203	0.282292	-0.164599	0.0975973	0.336254	0.0179618	-0.0736474	0.179695	-0.0106061	0.313937	0.319476	-0.138184	-0.0108599	0.0700857	0.22728	0.126664	0.200819			0.610218	0.138007	-0.138514	0.17348	-0.160334	0.0193523	0.538963	-0.00347492	0.0416884	0.0814918	-0.172195	0.182896	0.132057	0.216046	0.919957	0.249874	0.038176	0.0203325	0.280543	0.0363382					0.170247	0.117885	-0.0210995	-0.275443	0.375857	0.00796542
0.413089	-0.108213	0.324429	-0.111502	0.107933	0.342313	0.0185044	-0.0675248	0.205714	-0.0166303	0.269152	0.315458	-0.105334	-0.0117611	0.0664982	0.219588	0.141176	0.203229			0.552391	0.127903	-0.29036	0.154457	-0.16642	0.0188413	0.460064	0.0464018	0.171908	0.0942778	-0.175886	0.18918	0.128926	0.191439	0.911121	0.259	0.0339321	0.0204529	0.280665	0.035487					0.170051	0.115884	-0.024398	-0.272638	0.399596	0.00386556
0.41889	-0.0588588	0.362941	-0.054795	0.0974485	0.341119	0.0347546	-0.0971577	0.23306	-0.0439258	0.259234	0.308426	-0.115427	-0.197786	0.0700287	0.225936	0.150912	0.202446			0.52274	0.116431	-0.263328	0.149936	-0.165081	0.0185877	0.369731	0.082806	0.165323	0.0992279	-0.179386	0.189355	0.125236	0.169811	0.934456	0.285906	0.0494943	0.019576	0.277007	0.0350346					0.201909	0.109688	-0.0302643	-0.269511	0.42934	0.00448736
0.420298	-0.0619506	0.445915	-0.0576266	0.100444	0.328676	0.0530427	-0.0951504	0.226013	-0.004964	0.259885	0.30267	-0.126939	-0.270327	0.0736109	0.227348	0.153333	0.20241			0.395471	0.11597	-0.399555	0.153625	-0.147708	0.0164835	0.322267	0.117995	0.172715	0.09685	-0.182365	0.207658	0.112928	0.146756	0.927378	0.34709	0.0418519	0.0234006	0.274377	0.0332135					0.200485	0.0987124	-0.0336182	-0.268668	0.446838	0.00507328
0.4467	-0.03354	0.457745	-0.0556864	0.0963111	0.327134	0.0603523	-0.0848476	0.18369	0.0403487	0.234707	0.288442	-0.141124	-0.308467	0.108092	0.223557	0.132061	0.198766			0.405551	0.123449	-0.477679	0.172223	-0.134268	-0.0245802	0.243443	0.128735	0.102034	0.0876286	-0.182145	0.223889	0.119565	0.135175	0.951451	0.348898	0.0378096	0.025361	0.27207	0.0327304					0.167847	0.0925596	-0.0330782	-0.264558	0.455038	0.00503242
0.557963	-0.0213073	0.455467	-0.0436413	0.106487	0.335771	0.0692137	-0.0607621	0.185145	0.045948	0.213025	0.291593	-0.145599	-0.303258	0.104507	0.226592	0.141487	0.194936			0.504701	0.110311	-0.62859	0.198888	-0.138091	-0.00687297	0.28273	0.0735482	0.053249	0.0877248	-0.172599	0.243546	0.126314	0.145414	0.893266	0.381552	0.0351659	0.0245356	0.282899	0.0309493					0.196066	0.0872492	-0.032829	-0.262876	0.461794	0.00684692
0.695711	-0.0430056	0.502112	-0.0180257	0.104095	0.329046	0.0598954	-0.0505502	0.170723	0.0505095	0.2177	0.303341	-0.149283	-0.214865	0.0957097	0.242693	0.138127	0.188366			0.463517	0.109115	-0.703302	0.211786	-0.141541	-0.0067571	0.290781	0.109601	0.0207972	0.0871793	-0.169448	0.246758	0.136301	0.172859	0.941754	0.356455	0.0309373	0.0219583	0.277979	0.0282808					0.197772	0.0804124	-0.0402129	-0.254617	0.46901	0.007092
0.829615	-0.0640435	0.525581	0.0271557	0.111903	0.323951	0.0905927	-0.0475996	0.184222	0.051633	0.2159	0.30139	-0.151219	-0.262161	0.0938526	0.246528	0.139125	0.190226			0.452427	0.104305	-0.683615	0.219421	-0.151706	-0.00287933	0.376485	0.142149	0.029947	0.0935371	-0.167452	0.238501	0.139573	0.211051	0.912789	0.341324	0.0357962	0.0227087	0.270885	0.0327879					0.215984	0.0766466	-0.0386234	-0.254793	0.471751	0.00769026
0.954914	-0.0869843	0.54263	0.00502445	0.10324	0.314174	0.056716	-0.0423368	0.183452	0.0518868	0.220702	0.297463	-0.145662	-0.263378	0.0933187	0.241203	0.13441	0.192116			0.42975	0.0979305	-0.658364	0.218913	-0.144791	0.021354	0.398732	0.00376366	0.0253122	0.108052	-0.180228	0.239484	0.134068	0.158678	0.882112	0.378527	0.0319826	0.0246029	0.267733	0.0314242					0.222544	0.0758497	-0.0393872	-0.253892	0.47464	0.00605904
1.07012	-0.104236	0.578468	0.00743558	0.107679	0.304097	0.0761856	-0.0478943	0.169963	0.0656784	0.262675	0.291889	-0.144464	-0.276961	0.110746	0.229908	0.113627	0.191136			0.431634	0.0913279	-0.64794	0.223036	-0.125752	0.0117348	0.363118	-0.0269928	-0.0186989	0.10976	-0.172485	0.248516	0.125733	0.132325	0.938601	0.375747	0.0309029	0.0255856	0.261389	0.0314933					0.271765	0.0661137	-0.0356831	-0.243191	0.47628	0.00618634
1.1831	-0.171751	0.617759	0.0125554	0.114379	0.297071	0.0935121	-0.0380606	0.182438	0.0716819	0.265247	0.31523	-0.127078	-0.22412	0.100952	0.223692	0.112897	0.190437			0.464862	0.0906824	-0.63663	0.235489	-0.101638	0.0326873	0.377424	-0.012671	-0.0567788	0.106839	-0.175357	0.260758	0.126198	0.102771	0.926985	0.404878	0.0269463	0.0256097	0.258758	0.0311095					0.275638	0.0633289	-0.0363402	-0.247823	0.469919	0.00581857
1.29316	-0.165849	0.611211	0.0802766	0.11581	0.302096	0.0987817	-0.0432394	0.182276	0.0704156	0.259163	0.333303	-0.12364	-0.193627	0.103156	0.233249	0.10579	0.19282			0.508457	0.0889829	-0.630196	0.22641	-0.104114	0.0392876	0.237178	-0.0176573	-0.0879992	0.101112	-0.175159	0.268675	0.141816	0.100452	0.915904	0.407153	0.031517	0.0247322	0.267604	0.0308564					0.281552	0.0563203	-0.0404265	-0.250799	0.461614	0.00646298
1.37728	-0.210252	0.661594	0.171093	0.116089	0.298852	0.103707	-0.00393978	0.210656	0.027338	0.261759	0.349817	-0.110836	-0.165964	0.0635987	0.244547	0.105717	0.193801			0.46048	0.0775036	-0.605826	0.218376	-0.118044	0.051753	0.191513	-0.061224	0.0316792	0.117943	-0.169228	0.261718	0.133363	0.093215	0.954815	0.441943	0.0121251	0.0260109	0.273815	0.0327209					0.318288	0.0497382	-0.041178	-0.252902	0.456655	0.00583182
1.26312	-0.237795	0.699309	0.240559	0.107445	0.292749	0.112666	-0.0238085	0.199897	0.0284044	0.270831	0.327955	-0.113303	-0.0516123	0.0567748	0.243866	0.0923581	0.195872			0.368215	0.0864918	-0.586565	0.213481	-0.118246	0.0549795	0.230277	-0.0286195	0.0438987	0.115839	-0.184632	0.249901	0.139583	0.0730687	0.967637	0.466139	0.00294186	0.0280297	0.263736	0.0331662					0.308135	0.0551791	-0.0458796	-0.241535	0.455246	0.00489274
1.11614	-0.232851	0.682092	0.255794	0.11101	0.300926	0.120076	0.0195314	0.200878	0.0273231	0.246404	0.322386	-0.0905988	-0.0732241	0.0637137	0.273856	0.0874153	0.197326			0.352011	0.086918	-0.587565	0.207309	-0.119134	0.0853539	0.265076	-0.0766581	0.0666709	0.124075	-0.180301	0.245406	0.138971	0.0648937	0.977785	0.518468	0.00962486	0.0306813	0.271533	0.0347726					0.307654	0.0475383	-0.0404	-0.246987	0.454881	0.00466117
0.97005	-0.235085	0.684316	0.236734	0.104309	0.298329	0.113773	0.0210703	0.16942	0.0659679	0.25161	0.336236	-0.134198	-0.0223728	0.076886	0.315435	0.116712	0.195635			0.287886	0.0921907	-0.529909	0.198154	-0.121626	0.103721	0.295878	-0.154484	0.0896495	0.117832	-0.180362	0.254413	0.133795	0.0205031	0.986907	0.581285	0.0034356	0.0341676	0.277908	0.0287205					0.306276	0.0475705	-0.0392022	-0.246695	0.445305	0.00408667
0.8267	-0.20514	0.642861	0.292208	0.110524	0.297874	0.16634	0.0693502	0.175577	0.0631616	0.2545	0.340787	-0.17222	-0.0451024	0.0758493	0.379932	0.135431	0.195383			0.364825	0.0915511	-0.54728	0.207215	-0.107701	0.107357	0.279162	-0.151771	0.114204	0.112179	-0.189531	0.27106	0.131765	0.0498322	0.991758	0.617904	0.000664428	0.0388585	0.283713	0.0317682					0.328823	0.0375538	-0.0395505	-0.250872	0.430983	0.00657735
0.700937	-0.178987	0.604583	0.308414	0.104797	0.299384	0.166678	0.118349	0.203648	0.0605707	0.210159	0.346229	-0.151663	-0.00623089	0.0720648	0.422537	0.139939	0.197044			0.359572	0.103316	-0.517896	0.21363	-0.111431	0.124321	0.33889	-0.102368	0.110322	0.106025	-0.206571	0.27448	0.151341	0.0647263	0.956064	0.64836	0.0110337	0.0420834	0.292098	0.0329895					0.278179	0.0417126	-0.0409887	-0.270435	0.425886	0.00701141
0.579852	-0.187616	0.609474	0.311272	0.108795	0.308974	0.178989	0.14084	0.181862	0.056842	0.210009	0.323325	-0.194338	0.10508	0.0794607	0.4452	0.138203	0.1975			0.457146	0.110461	-0.538873	0.211124	-0.123034	0.131899	0.339812	-0.168056	0.0880144	0.107305	-0.210891	0.273429	0.156702	0.0849753	0.897753	0.692161	-0.00384195	0.0498642	0.288348	0.0307252					0.295712	0.0382751	-0.0406907	-0.26132	0.409257	0.00601861
0.455759	-0.168632	0.552792	0.311258	0.10095	0.310289	0.114956	0.148344	0.237459	0.0241006	0.217308	0.30279	-0.176807	0.277906	0.0802729	0.460887	0.142284	0.195735			0.39467	0.117441	-0.492512	0.212562	-0.123125	0.14896	0.487148	-0.252875	0.0599758	0.126725	-0.221691	0.265501	0.148448	0.0722526	0.992111	0.72423	-0.0106318	0.052602	0.272183	0.0323246					0.285854	0.04179	-0.040405	-0.250173	0.401493	0.00602822
0.32853	-0.141614	0.511823	0.286153	0.100873	0.3172	0.110214	0.161629	0.265009	0.0295431	0.232574	0.281613	-0.187888	0.239581	0.0944926	0.447143	0.14293	0.194149			0.481372	0.117043	-0.476154	0.206493	-0.101132	0.163246	0.514188	-0.213038	0.0595879	0.118756	-0.236001	0.273259	0.140906	0.0918151	0.940133	0.73863	0.0131744	0.0556745	0.272115	0.0320497					0.2521	0.0390781	-0.0449454	-0.233882	0.398829	0.00540007
0.373276	-0.116723	0.478923	0.274802	0.0990867	0.324467	0.135197	0.178857	0.326317	0.0311363	0.220946	0.278953	-0.214963	0.114789	0.10665	0.443064	0.139151	0.190796			0.598836	0.119657	-0.413263	0.204514	-0.0876317	0.131709	0.462003	-0.178372	0.0342989	0.123202	-0.237835	0.28641	0.130939	0.132446	0.999678	0.722559	0.0284885	0.058046	0.272838	0.0324085					0.247173	0.0270187	-0.0456483	-0.237981	0.391896	0.00503879
0.426302	-0.130102	0.496576	0.278126	0.10371	0.323938	0.165079	0.1748	0.331354	0.0402851	0.222517	0.27323	-0.257117	0.183865	0.109899	0.390205	0.145637	0.191333			0.617529	0.12848	-0.380278	0.214992	-0.0677869	0.122127	0.431443	-0.0957038	0.00160827	0.110773	-0.251289	0.299985	0.1302	0.130568	0.92514	0.702053	0.0231261	0.0619436	0.258361	0.0320162					0.241872	0.023678	-0.0502906	-0.240526	0.385729	0.00465559
0.423078	-0.132025	0.501069	0.27593	0.107401	0.330996	0.172861	0.236018	0.350535	0.0122625	0.220372	0.252958	-0.211458	0.199646	0.114406	0.337438	0.108058	0.190441			0.687685	0.130485	-0.429773	0.224455	-0.0620415	0.116183	0.332287	-0.0630062	-0.0205608	0.112437	-0.260347	0.304302	0.137899	0.133595	0.910285	0.686852	0.0179136	0.0590846	0.260448	0.0355913					0.263414	0.0188763	-0.0544741	-0.234023	0.382608	0.00332366
0.418907	-0.16021	0.565199	0.268959	0.109572	0.335974	0.185675	0.252089	0.36376	0.0225473	0.172766	0.240238	-0.161759	0.270129	0.114668	0.257715	0.0867186	0.189384			0.641954	0.135138	-0.426084	0.222752	-0.0730798	0.119421	0.291025	-0.0097902	-0.055755	0.116041	-0.257281	0.29383	0.155813	0.127528	0.873163	0.63641	0.0257341	0.0586414	0.258681	0.036112					0.236291	0.0206688	-0.0539313	-0.239314	0.380231	0.00386539
0.40677	-0.195864	0.613216	0.268648	0.0999694	0.336965	0.150487	0.229963	0.388773	0.0198577	0.191424	0.227319	-0.157268	0.2949	0.115704	0.196696	0.0846517	0.18566			0.672389	0.119347	-0.434774	0.222012	-0.0747074	0.138243	0.254624	-0.0417033	-0.0240621	0.113933	-0.254674	0.279439	0.154447	0.149186	0.911483	0.639224	0.0256938	0.057755	0.260157	0.0364969					0.226097	0.00743639	-0.0543428	-0.238084	0.369653	0.00514384
0.380139	-0.198619	0.605689	0.268563	0.101231	0.333305	0.126311	0.228258	0.419433	0.0217701	0.146176	0.238089	-0.109499	0.198908	0.146131	0.152114	0.0781804	0.184105			0.5559	0.113816	-0.403096	0.223533	-0.0791304	0.139756	0.256359	-0.0454818	0.0375329	0.106984	-0.251401	0.27521	0.142935	0.155935	0.920301	0.618938	0.027781	0.0540204	0.267517	0.0405507					0.181137	0.00125298	-0.0456598	-0.247031	0.368516	0.00543179
0.370468	-0.186556	0.607686	0.270858	0.104658	0.335916	0.189498	0.258766	0.386953	0.0272939	0.125987	0.249181	-0.103616	0.0676424	0.147765	0.103703	0.0742603	0.182524			0.630582	0.11226	-0.404264	0.229234	-0.0767411	0.117058	0.252007	-0.0187073	0.0224996	0.0962155	-0.255087	0.288207	0.152589	0.185606	0.86057	0.610113	0.0369999	0.0538314	0.27655	0.0396088					0.160178	-0.00293954	-0.0490779	-0.255269	0.367691	0.0085422
0.411229	-0.20733	0.661042	0.27333	0.112903	0.333658	0.17445	0.228879	0.375302	0.0299523	0.0926533	0.25968	-0.124512	0.12304	0.14768	0.0847556	0.0692525	0.181214			0.534991	0.116784	-0.382708	0.239391	-0.0812767	0.121233	0.260667	-0.0581728	-0.0673522	0.0969834	-0.250012	0.291356	0.151554	0.169928	0.894645	0.595147	0.0297883	0.0506611	0.274678	0.0400522					0.197825	-0.00227017	-0.0513135	-0.278666	0.358483	0.00721804
0.393912	-0.199792	0.66581	0.268271	0.107656	0.328786	0.164774	0.249824	0.321089	0.0340433	0.0765576	0.262449	-0.0758704	0.213949	0.145356	0.0591059	0.0692711	0.178686			0.481458	0.120083	-0.449977	0.244761	-0.0872443	0.120528	0.23521	-0.0555237	-0.0685267	0.0997717	-0.248502	0.291842	0.148676	0.157291	0.824214	0.58217	0.0324714	0.0477565	0.259647	0.0387529					0.191317	-0.00353705	-0.0482323	-0.291314	0.352222	0.00680578
0.378784	-0.196672	0.657763	0.25762	0.109801	0.331312	0.173083	0.242029	0.331626	0.0264158	0.0792089	0.264406	-0.0258503	0.0474268	0.145912	0.0412213	0.0724403	0.177777			0.491211	0.109883	-0.441408	0.244922	-0.109836	0.0926166	0.240013	-0.117537	-0.0915335	0.111741	-0.24567	0.268165	0.143992	0.18049	0.8136	0.58224	0.0315227	0.0464749	0.2563	0.0380278					0.20083	0.0061063	-0.0491938	-0.288669	0.346888	0.00696162
0.368785	-0.143832	0.586926	0.271576	0.100085	0.333224	0.146234	0.222465	0.365117	0.0230343	0.0521724	0.264905	-0.0202661	0.0636361	0.135333	0.0222036	0.100839	0.178296			0.557516	0.101149	-0.430414	0.237355	-0.109684	0.0958992	0.243889	-0.155855	-0.158856	0.112207	-0.235295	0.25021	0.135011	0.186341	0.79874	0.569469	0.0382107	0.050415	0.248915	0.0404353					0.16821	0.000106541	-0.0518148	-0.30135	0.339522	0.00751794
0.405368	-0.117502	0.543224	0.269285	0.0937245	0.331672	0.151332	0.196293	0.364411	0.0257918	0.0618973	0.265256	-0.00541584	-0.0420712	0.140295	0.0159463	0.102785	0.177072			0.614333	0.0934393	-0.445131	0.237377	-0.103626	0.0972247	0.238018	-0.158033	-0.165586	0.115956	-0.231401	0.247075	0.120289	0.211847	0.81736	0.580793	0.0329046	0.0508588	0.244976	0.040431					0.186314	-0.00658467	-0.0477294	-0.295916	0.331986	0.00680086
0.44082	-0.114423	0.534066	0.256752	0.0946878	0.330465	0.213575	0.206212	0.330284	0.0328893	0.0731354	0.263873	-0.0535426	-0.104821	0.140004	0.0111348	0.109633	0.17729			0.635044	0.103176	-0.433988	0.241887	-0.100292	0.0840424	0.243808	-0.183829	-0.23123	0.118151	-0.227586	0.265486	0.107537	0.211567	0.79065	0.567764	0.0322882	0.0519013	0.237385	0.0405872					0.252642	-0.00746716	-0.0461388	-0.283966	0.324322	0.00679371
0.445111	-0.0891522	0.493269	0.254616	0.0975761	0.330602	0.248125	0.219037	0.318757	0.0360249	0.0841011	0.252581	-0.0938518	-0.158361	0.112911	0.000451091	0.122574	0.174318			0.639488	0.110514	-0.403644	0.244003	-0.101495	0.0660856	0.162367	-0.206112	-0.320578	0.119324	-0.225486	0.27125	0.107535	0.202145	0.799095	0.552208	0.0584115	0.0525084	0.233747	0.0389351					0.265613	-0.0105696	-0.0455406	-0.278585	0.318623	0.00726413
0.489008	-0.134829	0.533669	0.233142	0.103851	0.332816	0.246143	0.228459	0.33812	0.0350901	0.092145	0.233123	-0.0969272	-0.166918	0.102246	-0.0112068	0.123358	0.174097			0.647151	0.113941	-0.414329	0.241497	-0.10988	0.0725848	0.113481	-0.156288	-0.266095	0.126339	-0.214527	0.263418	0.0962375	0.195923	0.790557	0.504018	0.0590955	0.0515102	0.228487	0.0408997					0.279276	-0.0181475	-0.0465953	-0.280247	0.309917	0.00331911
0.439362	-0.119972	0.459202	0.225057	0.1151	0.330817	0.251429	0.265626	0.348769	0.035759	0.142756	0.209861	-0.0589073	-0.17767	0.127497	-0.0218184	0.12627	0.170348			0.692859	0.114923	-0.41646	0.235535	-0.127618	0.0651961	0.0496408	-0.143695	-0.264519	0.129622	-0.215322	0.240421	0.101713	0.190596	0.776284	0.47438	0.0638458	0.0505403	0.222076	0.0391597					0.258849	-0.0252237	-0.0435289	-0.278089	0.308771	0.00619947
0.423592	-0.170812	0.486162	0.218068	0.123653	0.33089	0.255356	0.27649	0.330479	0.063049	0.164674	0.192847	-0.0973009	-0.219587	0.116789	-0.0291296	0.131907	0.17036			0.74735	0.117807	-0.359691	0.226805	-0.149813	0.0895313	0.0679907	-0.13483	-0.281363	0.120213	-0.222446	0.232467	0.119748	0.194462	0.852131	0.466828	0.0544161	0.0513408	0.236064	0.0397494					0.256245	-0.0294385	-0.0439586	-0.266392	0.304293	0.00780223
0.409769	-0.171699	0.480125	0.228303	0.119387	0.330307	0.224235	0.280515	0.32518	0.067861	0.175206	0.172611	-0.13953	-0.195691	0.118284	-0.0368107	0.128705	0.167118			0.693113	0.12669	-0.324044	0.215917	-0.142083	0.113165	0.0432176	-0.113884	-0.255959	0.117859	-0.213873	0.231672	0.123614	0.195766	0.882753	0.422917	0.0638524	0.0500508	0.243499	0.0406819					0.259425	-0.0438716	-0.0368557	-0.244254	0.300369	0.0083622
0.447383	-0.227574	0.55336	0.222413	0.138794	0.335939	0.229482	0.256741	0.284707	0.0735853	0.183583	0.174332	-0.181533	-0.163076	0.156778	-0.041021	0.126582	0.164645			0.564981	0.132108	-0.311387	0.221062	-0.129279	0.106868	0.0618286	-0.0795068	-0.244557	0.121394	-0.211013	0.232237	0.122969	0.185189	0.900864	0.420495	0.0585375	0.0409229	0.24155	0.0387364					0.257803	-0.0452699	-0.0329881	-0.227553	0.294166	0.00787252
0.445822	-0.255363	0.593482	0.222478	0.162469	0.344616	0.213423	0.271902	0.255976	0.0555764	0.194527	0.153329	-0.194292	0.0363527	0.14738	-0.0473433	0.121934	0.160453			0.535524	0.133032	-0.236791	0.223327	-0.130175	0.0998366	0.0650089	-0.103878	-0.261514	0.108872	-0.2201	0.231007	0.1166	0.197821	0.86991	0.429505	0.0517835	0.039614	0.247733	0.0391585					0.242285	-0.0456161	-0.039459	-0.228315	0.292096	0.00632603
0.386301	-0.240671	0.557222	0.227699	0.255053	0.358662	0.174718	0.279613	0.248687	0.0509009	0.192494	0.130093	-0.149113	0.0147872	0.137121	-0.0494873	0.119743	0.158071			0.509998	0.13576	-0.228671	0.229285	-0.143342	0.0894144	0.0612595	-0.0938414	-0.278185	0.116782	-0.211465	0.216731	0.129687	0.194853	0.870291	0.373412	0.0506699	0.0381902	0.248344	0.0383847					0.172467	-0.0467202	-0.0445254	-0.230949	0.289192	0.0051523
0.426886	-0.24989	0.559393	0.206502	0.343159	0.369789	0.160585	0.287927	0.235644	0.0558986	0.208289	0.131646	-0.145654	0.123705	0.171985	-0.0521845	0.117276	0.159456			0.504894	0.129027	-0.237148	0.232527	-0.14907	0.108967	0.0885963	-0.0617166	-0.260837	0.124099	-0.190041	0.206254	0.152645	0.189834	0.867453	0.378161	0.0483666	0.0345618	0.254882	0.0383363					0.169665	-0.0482118	-0.0529156	-0.242533	0.286083	0.00375789
0.423509	-0.239366	0.530002	0.229462	0.453463	0.387244	0.156689	0.287581	0.24091	0.0611741	0.210743	0.143895	-0.184453	0.0549742	0.177105	-0.0549627	0.115791	0.156144			0.505809	0.126988	-0.18565	0.241603	-0.152726	0.10692	0.080736	-0.0506137	-0.315115	0.116372	-0.179526	0.194643	0.164064	0.173704	0.864445	0.398892	0.0498848	0.029701	0.253808	0.0403209					0.195068	-0.0464916	-0.0477408	-0.240521	0.278536	0.00572409
0.465612	-0.248667	0.560549	0.218887	0.584865	0.392703	0.197741	0.28653	0.21528	0.0633168	0.190506	0.160634	-0.180974	0.0839167	0.143899	-0.0579772	0.1163	0.154892			0.541437	0.130176	-0.168475	0.254218	-0.135106	0.113825	0.121621	-0.0795665	-0.313484	0.125633	-0.177149	0.200599	0.158233	0.187381	0.848723	0.382694	0.0625497	0.0288352	0.261625	0.0399887					0.230722	-0.0423512	-0.0491577	-0.242636	0.269146	0.00403877
0.46686	-0.225497	0.538006	0.216796	0.705517	0.401696	0.197737	0.280467	0.261904	0.0394032	0.217195	0.174527	-0.172348	0.189626	0.146758	-0.059504	0.115893	0.154886			0.603684	0.116173	-0.177571	0.252109	-0.092197	0.110502	0.11152	-0.155868	-0.157011	0.131639	-0.176711	0.189224	0.151859	0.168195	0.791425	0.362161	0.0743793	0.0233867	0.252909	0.039905					0.269348	-0.0397269	-0.0477537	-0.252004	0.263381	0.00252555
0.466896	-0.204375	0.525431	0.215158	0.828301	0.419686	0.206641	0.289734	0.269887	0.0386842	0.254622	0.192394	-0.130213	0.230769	0.186856	-0.0614761	0.114541	0.155142			0.707934	0.105681	-0.181252	0.256585	-0.087061	0.0893231	0.114743	-0.0778753	-0.0377427	0.126632	-0.192964	0.199553	0.141674	0.14052	0.78793	0.390363	0.0571842	0.0207104	0.253504	0.038823					0.242769	-0.0391943	-0.047384	-0.274063	0.254754	0.00239017
0.469964	-0.181746	0.483792	0.215771	0.937929	0.441665	0.23796	0.315803	0.299195	0.0322953	0.264981	0.185665	-0.0905862	0.201331	0.140336	-0.0619291	0.0868725	0.158652			0.787387	0.102252	-0.156857	0.246054	-0.0975409	0.1011	0.138188	-0.118664	-0.0249053	0.11441	-0.203818	0.19185	0.151125	0.14631	0.793543	0.359232	0.0678465	0.0228293	0.259955	0.0348407					0.263338	-0.0395759	-0.0398604	-0.282918	0.248641	0.00324469
0.472305	-0.162423	0.449984	0.197383	1.07576	0.454623	0.226678	0.34081	0.300119	0.0513083	0.277463	0.202432	-0.086681	0.126263	0.138292	-0.0638986	0.0906029	0.16242			0.779246	0.0994224	-0.171324	0.234411	-0.105813	0.11983	0.126143	-0.0624905	-0.0474071	0.124771	-0.185273	0.177563	0.161247	0.104633	0.810327	0.293427	0.0759705	0.0203914	0.256205	0.0327959					0.270885	-0.0401971	-0.0334787	-0.290488	0.240805	0.00423743
0.482497	-0.162043	0.459084	0.191917	1.12024	0.459762	0.264633	0.366682	0.298893	0.0587126	0.268391	0.220834	-0.125282	0.190237	0.140002	-0.0652442	0.0838601	0.168559			0.825478	0.08567	-0.249464	0.238171	-0.103689	0.153914	0.121687	-0.0921249	-0.0372021	0.130292	-0.194503	0.16693	0.147679	0.093994	0.805066	0.360527	0.0645554	0.0134525	0.2685	0.0323275					0.285453	-0.0431083	-0.0280014	-0.300222	0.236627	0.00473175
0.488194	-0.1515	0.473779	0.204429	1.182	0.477228	0.209735	0.394171	0.296385	0.0562945	0.274763	0.217135	-0.12417	0.126956	0.0976927	-0.0660124	0.0735441	0.172087			0.760485	0.0739511	-0.253861	0.232867	-0.0918967	0.168321	0.130266	-0.104516	-0.0478026	0.132389	-0.204337	0.165563	0.128028	0.0836693	0.807132	0.34592	0.0419836	0.0124071	0.257892	0.0339058					0.283955	-0.0444986	-0.0259503	-0.284283	0.226601	0.00490503
0.492825	-0.139792	0.486812	0.201459	1.18134	0.46322	0.200859	0.396283	0.272031	0.0546287	0.29348	0.206465	-0.087363	0.229731	0.112699	-0.0668962	0.0765374	0.178475			0.749495	0.0597277	-0.275754	0.228739	-0.0822661	0.190559	0.188558	-0.174894	-0.0192685	0.142305	-0.213799	0.165219	0.12898	0.0832547	0.817586	0.313164	0.028865	0.00957334	0.267462	0.0320265					0.253944	-0.0479359	-0.0204616	-0.276193	0.224229	0.00448412
0.455811	-0.142473	0.496394	0.217616	1.14118	0.479705	0.148317	0.377697	0.287345	0.0536065	0.301487	0.196877	-0.0905433	0.191535	0.114959	-0.0666547	0.0768971	0.185635			0.759388	0.0457669	-0.242305	0.231423	-0.0876117	0.204979	0.195656	-0.172443	0.0024158	0.13621	-0.205197	0.168273	0.127604	0.0870995	0.842116	0.329391	0.0285345	0.0248061	0.254411	0.0324264					0.211824	-0.0528041	-0.0190622	-0.259178	0.222196	0.00518599
0.41828	-0.144406	0.501907	0.218332	1.1082	0.49652	0.11596	0.379471	0.277432	0.0478524	0.300025	0.190436	-0.0985787	0.0791757	0.113348	-0.067091	0.0954681	0.186379			0.686054	0.052737	-0.225078	0.24581	-0.111529	0.205228	0.204533	-0.155099	0.0187018	0.140965	-0.188337	0.171537	0.130815	0.0911968	0.852594	0.329287	0.0193532	0.0226401	0.267459	0.0330461					0.15949	-0.0538983	-0.0155423	-0.234327	0.21896	0.00436849
0.382193	-0.16079	0.490822	0.224369	1.0728	0.492884	0.131174	0.390142	0.272457	0.0534711	0.286765	0.217067	-0.137413	0.0586584	0.0604571	-0.0680222	0.0926365	0.186			0.704603	0.043643	-0.228379	0.255722	-0.10797	0.21125	0.200065	-0.263274	-0.123153	0.147367	-0.170898	0.160637	0.141293	0.0774367	0.853237	0.288418	0.0403121	0.0362984	0.273774	0.0352064					0.176404	-0.0557032	-0.0224965	-0.221473	0.21433	0.00457361
0.344232	-0.165668	0.484052	0.227578	1.01097	0.496386	0.131385	0.429411	0.274327	0.0561551	0.292996	0.241848	-0.136978	-0.0207961	0.0875348	-0.0681538	0.0966889	0.184926			0.72209	0.0369789	-0.253409	0.254507	-0.105522	0.231142	0.145515	-0.259971	-0.0131697	0.165955	-0.167337	0.159195	0.144619	0.0630969	0.849041	0.304009	0.0364633	0.0304402	0.269982	0.0375184					0.153894	-0.0541646	-0.0254084	-0.201332	0.210571	0.0047396
0.306629	-0.172357	0.485331	0.241121	0.862934	0.497984	0.154237	0.444585	0.294655	0.0506652	0.281277	0.268616	-0.175156	-0.0648339	0.0910398	-0.0682612	0.103155	0.18576			0.718793	0.0416525	-0.218481	0.25548	-0.102498	0.227323	0.145746	-0.270975	0.0125415	0.164183	-0.174629	0.162752	0.136309	0.0539626	0.915225	0.320839	0.0364706	0.0244494	0.271201	0.0379359					0.158011	-0.0567007	-0.0245604	-0.19931	0.207998	0.00390241
0.3168	-0.165295	0.489524	0.253502	0.707818	0.504395	0.154147	0.463604	0.304049	0.0486177	0.207602	0.261109	-0.175128	-0.0926268	0.0984157	-0.069221	0.125396	0.184503			0.69381	0.04941	-0.222478	0.2557	-0.0863312	0.215147	0.16867	-0.320587	-0.004359	0.165169	-0.172543	0.166426	0.134754	0.0556062	0.885976	0.28335	0.0459153	0.0235924	0.258681	0.0382669					0.199356	-0.0552447	-0.0257741	-0.174243	0.204514	0.00284586
0.278981	-0.174182	0.485882	0.256107	0.513807	0.496575	0.228064	0.460746	0.28989	0.050472	0.123633	0.277028	-0.177924	-0.121171	0.0944583	-0.0716239	0.149774	0.178366			0.878144	0.0458	-0.176808	0.261553	-0.0976611	0.198309	0.176404	-0.295261	-0.042643	0.167179	-0.182015	0.172319	0.139022	0.0633798	0.915655	0.284149	0.0628769	0.0228728	0.26561	0.0358975					0.200259	-0.0532421	-0.0252071	-0.167947	0.204109	0.00431169
0.242281	-0.187399	0.479404	0.245915	0.362249	0.515623	0.275663	0.497264	0.291059	0.0520834	0.00630765	0.297204	-0.179189	-0.166432	0.0762597	-0.072769	0.149043	0.175874			0.903363	0.036929	-0.141644	0.26389	-0.101683	0.206552	0.16674	-0.308228	-0.0953883	0.164028	-0.182356	0.167786	0.143659	0.0749383	0.925723	0.297074	0.0746575	0.0203306	0.259978	0.0327848					0.202474	-0.0553596	-0.0275604	-0.150845	0.199023	0.00396452
0.256469	-0.187172	0.472753	0.24391	0.222672	0.524354	0.326804	0.538682	0.260256	0.0765477	-0.108803	0.316614	-0.219183	-0.134572	0.117577	-0.0743552	0.144789	0.173726			0.997198	0.0422856	-0.269108	0.25967	-0.0858328	0.179922	0.10973	-0.303576	-0.129834	0.160976	-0.187491	0.15595	0.148943	0.0835014	0.91838	0.26276	0.0653559	0.000497223	0.265703	0.0328115					0.242375	-0.0541103	-0.0240731	-0.139919	0.197062	0.00510017
0.265074	-0.180983	0.468068	0.246363	0.0889519	0.53143	0.368693	0.537312	0.242466	0.0871467	-0.238808	0.329529	-0.216274	-0.159414	0.118996	-0.075245	0.125778	0.172156			1.01674	0.0306436	-0.343264	0.257313	-0.0777493	0.200538	0.106092	-0.248604	-0.324682	0.166162	-0.194137	0.159304	0.139826	0.0898099	0.925557	0.260309	0.0652422	0.000571919	0.256262	0.0304248					0.258275	-0.0596401	-0.0207584	-0.149998	0.192314	0.00566122
0.284212	-0.177346	0.468411	0.247124	-0.0355494	0.539144	0.36561	0.529169	0.200707	0.110795	-0.343743	0.309888	-0.218036	-0.244468	0.11921	-0.0761633	0.130216	0.170434			0.968084	0.0350489	-0.430757	0.241847	-0.0796092	0.229061	0.120679	-0.192756	-0.320437	0.17468	-0.19881	0.160733	0.126122	0.101413	0.881921	0.293532	0.0420024	-0.0134188	0.250263	0.0292299					0.26316	-0.0646544	-0.0144512	-0.154982	0.190051	0.00714613
0.316007	-0.169954	0.479007	0.248528	-0.132377	0.544039	0.364619	0.487403	0.175774	0.1087	-0.462611	0.29528	-0.209486	-0.299865	0.0969137	-0.0783853	0.137478	0.166987			0.915644	0.040847	-0.507834	0.251906	-0.0675451	0.20916	0.158	-0.173003	-0.343477	0.174059	-0.193522	0.165938	0.11292	0.119588	0.867402	0.295427	0.0464085	-0.0152473	0.246755	0.0324987					0.268047	-0.071649	-0.0154778	-0.16454	0.188198	0.00600636
0.350549	-0.162728	0.480793	0.246626	-0.16568	0.557859	0.362407	0.467559	0.156823	0.116633	-0.535033	0.280411	-0.2078	-0.357536	0.0954068	-0.0781649	0.155163	0.160786			0.983471	0.0397428	-0.511524	0.266227	-0.0636788	0.217178	0.224739	-0.184734	-0.289469	0.170738	-0.18421	0.175148	0.120007	0.118608	0.830218	0.296546	0.0324319	-0.0169715	0.240718	0.0318751					0.286494	-0.0714027	-0.0133936	-0.137879	0.183929	0.00648107
0.405584	-0.167579	0.484777	0.231486	-0.154809	0.557172	0.364498	0.474119	0.141343	0.116541	-0.518525	0.30876	-0.212882	-0.44177	0.0900348	-0.0797043	0.140565	0.154804			0.900228	0.0336748	-0.37688	0.273877	-0.0854943	0.233672	0.217074	-0.162126	-0.273053	0.153213	-0.163188	0.166576	0.124088	0.133254	0.832086	0.269248	0.0443247	-0.0219466	0.237476	0.0330807					0.247743	-0.073923	-0.0104455	-0.139829	0.17725	0.00926031
0.44261	-0.16187	0.4856	0.23616	-0.137213	0.575313	0.349099	0.459945	0.122442	0.137444	-0.505302	0.291024	-0.209329	-0.520415	0.0953801	-0.079163	0.127638	0.153566			0.807357	0.0483943	-0.366293	0.284264	-0.0846976	0.253365	0.208598	-0.187109	-0.2545	0.164677	-0.146934	0.142995	0.124237	0.143266	0.827185	0.232262	0.0474731	-0.0303671	0.23335	0.0347137					0.24835	-0.0790156	-0.00142183	-0.143211	0.175839	0.00794848
0.488724	-0.147356	0.487861	0.242295	-0.112062	0.588382	0.337217	0.439841	0.0984531	0.141143	-0.447599	0.280427	-0.241191	-0.604722	0.117975	-0.0802938	0.128958	0.144477			0.807541	0.0580913	-0.365087	0.282327	-0.0768127	0.265286	0.224797	-0.155919	-0.109941	0.164489	-0.137592	0.131514	0.112342	0.128593	0.782777	0.221264	0.0577446	-0.0343817	0.239305	0.0365657					0.280893	-0.0811757	0.000854724	-0.15321	0.173534	0.00720603
0.520132	-0.140803	0.496646	0.236408	-0.0823542	0.591831	0.306104	0.421359	0.115053	0.112914	-0.372214	0.275438	-0.238504	-0.74039	0.0813121	-0.0785402	0.137209	0.134177			0.665517	0.0584264	-0.355933	0.295607	-0.0942338	0.304063	0.29364	-0.172343	-0.0996737	0.161035	-0.117442	0.140277	0.119878	0.122825	0.768643	0.202056	0.0586305	-0.0338898	0.249339	0.0354553					0.278054	-0.0876999	0.00488612	-0.162294	0.165773	0.00632801
0.568901	-0.136034	0.512464	0.232662	-0.0379958	0.598947	0.272515	0.435887	0.134546	0.101491	-0.2917	0.272145	-0.24562	-0.80052	0.0877862	-0.0776898	0.155441	0.131157			0.634082	0.0607283	-0.360817	0.290978	-0.0947487	0.307395	0.351094	-0.173883	-0.0986492	0.15567	-0.109552	0.146585	0.124466	0.111829	0.725566	0.207864	0.0621548	-0.0374383	0.244553	0.0371404					0.271704	-0.0892272	0.00672402	-0.166477	0.16221	0.00554529
0.595379	-0.119381	0.524121	0.225828	-0.00281554	0.605924	0.235748	0.465095	0.160713	0.0663193	-0.241342	0.271261	-0.206486	-0.796077	0.110855	-0.0770485	0.154278	0.128571			0.721584	0.0583242	-0.356765	0.296062	-0.0962168	0.319678	0.409458	-0.199273	-0.00163408	0.158787	-0.0978954	0.148386	0.127673	0.130167	0.780396	0.194173	0.0716902	-0.0488643	0.251027	0.0386166					0.269156	-0.0839504	0.01396	-0.157791	0.160141	0.00336002
0.595941	-0.113219	0.530134	0.213344	0.0320668	0.602488	0.223346	0.475744	0.17051	0.0636676	-0.155692	0.263237	-0.25362	-0.769049	0.119664	-0.0770439	0.148289	0.124615			0.792418	0.0473033	-0.26414	0.299444	-0.113523	0.334309	0.430142	-0.183214	-0.0870874	0.153501	-0.0952088	0.140864	0.128256	0.111397	0.801272	0.210064	0.0682444	-0.0514914	0.274034	0.0366411					0.265261	-0.0834719	0.00977055	-0.157366	0.157174	0.00500161
0.58786	-0.103505	0.532763	0.212505	0.0400547	0.606877	0.184453	0.465151	0.169964	0.0590281	-0.108109	0.249644	-0.257781	-0.759994	0.126082	-0.0778407	0.124373	0.122703			0.738184	0.0408543	-0.353877	0.297672	-0.107252	0.336119	0.390818	-0.219352	-0.164271	0.156832	-0.094636	0.126034	0.122176	0.0932537	0.78044	0.209107	0.09089	-0.0554612	0.278441	0.0376242					0.245424	-0.089347	0.00656287	-0.170958	0.156623	0.00401957
0.557984	-0.0989488	0.527083	0.215865	0.0449392	0.622388	0.12733	0.435262	0.155843	0.0563259	-0.0886098	0.235842	-0.260659	-0.597296	0.126623	-0.0781535	0.124255	0.120475			0.788326	0.041418	-0.454873	0.283379	-0.0942219	0.315558	0.367303	-0.20732	-0.141204	0.16893	-0.10588	0.120351	0.123071	0.0811601	0.802585	0.214632	0.0558753	-0.0584933	0.300873	0.0357331					0.225055	-0.0888865	0.00900394	-0.174395	0.154354	0.00346398
0.54271	-0.100381	0.534091	0.2107	0.0612685	0.624808	0.104756	0.439564	0.175011	0.0296604	-0.0647555	0.252809	-0.261594	-0.525787	0.125775	-0.0780476	0.125317	0.118792			0.728783	0.028205	-0.568382	0.269177	-0.0830092	0.311643	0.383251	-0.178945	-0.131749	0.150828	-0.111492	0.12699	0.11732	0.0695894	0.770288	0.223705	0.0457173	-0.0597453	0.295448	0.0361263					0.273838	-0.08788	0.00188783	-0.181878	0.15048	0.00310851
0.588548	-0.0977618	0.536946	0.211751	0.0797794	0.610692	0.0937536	0.432538	0.205966	0.0279053	-0.0504688	0.263802	-0.227935	-0.478051	0.121714	-0.0752034	0.140211	0.118066			0.695386	0.025473	-0.596916	0.265762	-0.0864581	0.277924	0.328065	-0.144919	-0.175942	0.152032	-0.109469	0.145957	0.117077	0.0808186	0.888423	0.222518	0.0431885	-0.0643908	0.288914	0.0356971					0.289327	-0.0873716	-0.000473481	-0.190314	0.149788	0.00298339
0.564604	-0.0999705	0.538264	0.20973	0.0935605	0.61678	0.122292	0.419921	0.209265	0.0275718	-0.0703607	0.272004	-0.189238	-0.401062	0.119812	-0.075674	0.139743	0.122561			0.652134	0.0188726	-0.456074	0.270405	-0.0841881	0.239795	0.262937	-0.0710673	-0.100395	0.159919	-0.129701	0.135881	0.111446	0.0522757	0.916477	0.250079	0.034385	-0.0745098	0.280748	0.0359923					0.25675	-0.0807602	-0.00122408	-0.18321	0.150346	0.00391917
0.634144	-0.0996157	0.538562	0.206749	0.0939394	0.61639	0.142431	0.411397	0.191884	0.0291601	-0.083182	0.281823	-0.188553	-0.300894	0.120697	-0.077277	0.129522	0.12225			0.6926	0.0187968	-0.43548	0.277829	-0.0876525	0.266582	0.18034	-0.0491243	-0.105721	0.159277	-0.13529	0.12592	0.107854	0.0685224	0.968776	0.257768	0.0310165	-0.0775733	0.286676	0.0363312					0.266716	-0.0772077	-0.00109956	-0.189314	0.147598	0.00464558
0.718698	-0.104359	0.504899	0.208986	0.0917101	0.547453	0.140871	0.389213	0.171754	0.0324548	-0.0855822	0.272007	-0.236742	-0.296891	0.103213	-0.0774408	0.127456	0.122122			0.569131	0.0122848	-0.411964	0.296758	-0.0877681	0.270685	0.0815606	-0.0522833	-0.164695	0.148703	-0.134137	0.122296	0.111178	0.0511425	0.947111	0.254573	0.030127	-0.0806769	0.281532	0.0380687					0.278693	-0.0748218	-0.00357596	-0.198246	0.14757	0.00461224
0.780673	-0.0997837	0.492192	0.214052	0.0965877	0.476543	0.137406	0.38952	0.163149	0.0364979	-0.133595	0.276423	-0.211171	-0.184361	0.104439	-0.0783401	0.126017	0.125945			0.467123	0.0174431	-0.486516	0.29398	-0.0793224	0.243919	0.00773847	-0.0350823	-0.118827	0.150941	-0.146949	0.121608	0.110289	0.0549615	1.0374	0.202165	0.0240899	-0.0826417	0.260081	0.0418479					0.302813	-0.07116	0.00572652	-0.198449	0.14687	0.00296803
0.873043	-0.0910241	0.44259	0.217304	0.113093	0.406115	0.137786	0.387258	0.160451	0.0398735	-0.140974	0.284965	-0.170105	-0.169981	0.119126	-0.0780861	0.133333	0.127432			0.435657	0.023063	-0.486431	0.295463	-0.0647952	0.208324	-0.0570976	-0.0348814	-0.047358	0.155565	-0.151408	0.129453	0.11512	0.08959	1.02671	0.190913	0.0200131	-0.0721705	0.254056	0.0432892					0.318352	-0.0691354	0.00757794	-0.198162	0.138659	0.00377815
0.969073	-0.0846308	0.417605	0.221936	0.113484	0.349277	0.193372	0.403078	0.168136	0.0357717	-0.133022	0.280826	-0.174319	-0.250819	0.123824	-0.0788078	0.138246	0.127192			0.440064	0.0304437	-0.488965	0.297539	-0.0555002	0.194802	-0.0594921	0.0453588	-0.0137086	0.162345	-0.154782	0.13034	0.112261	0.0919073	0.984948	0.223213	0.0513737	-0.0585838	0.238925	0.0438637					0.349666	-0.070816	0.00607002	-0.20321	0.137187	0.00147007
1.06295	-0.049019	0.381298	0.223155	0.121899	0.272995	0.212809	0.402684	0.138981	0.0598116	-0.161815	0.261846	-0.180284	-0.24669	0.129381	-0.0781544	0.141696	0.127808			0.535036	0.0375553	-0.47672	0.315252	-0.0607245	0.199814	-0.0615678	0.0047482	0.00886762	0.163157	-0.165007	0.139963	0.120271	0.125537	1.03072	0.228853	0.0463033	-0.0633711	0.245746	0.0454298					0.331751	-0.0696919	0.00376628	-0.20238	0.129579	0.00133953
1.01934	-0.0641245	0.390129	0.222686	0.11742	0.250039	0.18349	0.404078	0.10947	0.0433599	-0.18638	0.24968	-0.187228	-0.197339	0.117646	-0.0791714	0.134727	0.131838			0.566385	0.0427788	-0.530328	0.334663	-0.0564913	0.211814	-0.0611763	-0.0383154	-0.0243115	0.15983	-0.167266	0.124902	0.128021	0.117408	0.973139	0.254501	0.0477334	-0.0499757	0.240106	0.0479232					0.297455	-0.0647268	0.00637055	-0.189837	0.123154	0.00414553
1.13566	-0.0674078	0.369799	0.224044	0.106276	0.198945	0.154669	0.428664	0.106723	0.0459018	-0.188088	0.260638	-0.239527	-0.169321	0.11622	-0.0795454	0.141924	0.132111			0.640034	0.0551881	-0.634665	0.322422	-0.0579935	0.225729	-0.0420611	-0.0543154	-0.0663942	0.163712	-0.166706	0.116062	0.127699	0.121039	0.985976	0.266688	0.0639435	-0.0356303	0.233546	0.050043					0.331426	-0.0723576	0.00285682	-0.196856	0.116732	0.00200003
1.10063	-0.0279339	0.361476	0.221862	0.108254	0.184278	0.113767	0.449453	0.0968963	0.0455712	-0.208551	0.255703	-0.241825	-0.194634	0.127203	-0.0806735	0.143884	0.129222			0.611046	0.0640052	-0.620223	0.314406	-0.0621535	0.179077	-0.0383383	-0.116177	0.0492603	0.170759	-0.166192	0.104613	0.125351	0.108929	0.962334	0.309987	0.0839094	-0.0250751	0.238501	0.051353					0.357935	-0.0724433	-0.00103165	-0.185242	0.108269	0.00432815
1.08267	0.000884092	0.335421	0.2232	0.108578	0.273529	0.151565	0.448349	0.133856	0.0266123	-0.183245	0.256548	-0.231563	-0.144232	0.128326	-0.0810686	0.142958	0.128072			0.616619	0.0767075	-0.612224	0.308244	-0.053986	0.153809	0.0103028	-0.104527	0.103355	0.170213	-0.16631	0.099387	0.121939	0.105065	1.0002	0.354993	0.0795774	-0.0141086	0.236407	0.0493166					0.38203	-0.068776	-0.00391504	-0.177656	0.0998694	0.00444127
1.11677	0.0182947	0.284786	0.254895	0.0878696	0.367269	0.1639	0.469353	0.131742	0.0254124	-0.138296	0.252597	-0.227779	-0.202773	0.122195	-0.080004	0.159665	0.12163			0.675415	0.0861295	-0.595092	0.323293	-0.0515435	0.156638	0.0798381	-0.150064	0.0648008	0.167538	-0.152494	0.103178	0.136384	0.0885974	0.872527	0.428214	0.0874455	-0.00583722	0.242615	0.0476416					0.396748	-0.0738744	-0.0056828	-0.191311	0.0905928	0.00542112
1.12278	0.053126	0.295469	0.289289	0.0879402	0.498203	0.186463	0.469094	0.127633	0.0237805	-0.147845	0.248094	-0.245404	-0.156898	0.118792	-0.0799501	0.168061	0.122037			0.696845	0.0928305	-0.573343	0.322996	-0.0673497	0.167927	0.133109	-0.107047	0.060172	0.168811	-0.152916	0.11092	0.154492	0.106085	0.897949	0.510312	0.0791176	-0.00903329	0.251709	0.045989					0.397766	-0.0688955	-0.00654662	-0.183808	0.0888425	0.00539255
1.09349	0.0919903	0.288737	0.323112	0.0848795	0.626315	0.185329	0.45261	0.121401	0.0212272	-0.163881	0.25007	-0.216754	-0.150423	0.117853	-0.0791287	0.16316	0.121866			0.666566	0.0938934	-0.546375	0.326568	-0.0683442	0.178484	0.166907	-0.182126	0.0627909	0.153188	-0.147592	0.113481	0.161828	0.105157	0.935445	0.552288	0.0757568	-0.026854	0.240846	0.0478142					0.399175	-0.0679144	-0.00592869	-0.183002	0.082273	0.00763889
1.09798	0.0933391	0.294521	0.356576	0.0881274	0.816809	0.205327	0.452947	0.160848	-0.00571682	-0.146434	0.261187	-0.194397	-0.15388	0.125192	-0.080606	0.156482	0.120611			0.605089	0.0934701	-0.52325	0.317658	-0.0499288	0.152595	0.150088	-0.138784	0.0638021	0.166028	-0.142302	0.100972	0.165012	0.0942214	0.90986	0.604854	0.0910598	-0.0258023	0.245301	0.046932					0.381184	-0.0685016	0.00166498	-0.186013	0.0804793	0.00803326
1.15144	0.145137	0.268661	0.394437	0.0734599	0.832209	0.244439	0.445026	0.172584	-0.00904503	-0.138431	0.261409	-0.181255	-0.0683202	0.121568	-0.0807364	0.156861	0.117861			0.591204	0.0967824	-0.49718	0.303836	-0.0524194	0.1495	0.159684	-0.0956475	0.106729	0.162557	-0.141379	0.0950364	0.157288	0.0814214	0.896759	0.635873	0.083837	-0.0355	0.249229	0.0449417					0.445762	-0.0733059	0.00282932	-0.210999	0.0733585	0.00507091
1.1502	0.186466	0.264736	0.419562	0.0695106	0.880209	0.278631	0.41513	0.155209	-0.00885682	-0.122337	0.235389	-0.175823	-0.0783973	0.118658	-0.0798287	0.14677	0.116285			0.587119	0.0863072	-0.473254	0.312256	-0.0403834	0.154919	0.14896	-0.0883538	0.148728	0.144725	-0.134366	0.105988	0.154205	0.0929581	0.952553	0.67498	0.0729853	-0.054425	0.254282	0.0446702					0.447601	-0.0685039	0.00623713	-0.22602	0.0703591	0.00542667
1.16222	0.189735	0.24932	0.450072	0.0661611	0.878374	0.314405	0.425555	0.169814	-0.00583924	-0.116259	0.226024	-0.173402	0.0269447	0.105543	-0.0782056	0.145332	0.1202			0.605437	0.0865697	-0.458117	0.320879	-0.0268266	0.155002	0.168236	-0.074619	0.218579	0.133715	-0.115912	0.1149	0.149343	0.0751944	0.95092	0.69988	0.0577829	-0.0725458	0.25158	0.0361456					0.441276	-0.0696895	0.00609934	-0.242879	0.0711632	0.00511772
1.1463	0.195011	0.224224	0.473201	0.0721491	0.862689	0.308916	0.434981	0.143887	0.0197078	-0.12303	0.225537	-0.187194	0.00846619	0.109882	-0.0777591	0.148761	0.122447			0.620496	0.0776023	-0.413472	0.320664	-0.0376979	0.182744	0.134895	-0.042401	0.139132	0.138911	-0.11377	0.11092	0.158811	0.0715148	0.903446	0.736813	0.0521572	-0.0894555	0.253738	0.036664					0.500273	-0.0721009	0.00745551	-0.260549	0.0660427	0.00460186
1.11916	0.206495	0.216131	0.463659	0.102715	0.841584	0.295115	0.420695	0.131612	0.0358131	-0.130055	0.217524	-0.173723	0.0146248	0.114254	-0.0786726	0.166254	0.126466			0.62168	0.0723008	-0.39803	0.312233	-0.0467175	0.188947	0.0868289	0.0314837	0.173053	0.160306	-0.108146	0.104598	0.144377	0.0577937	0.925608	0.726362	0.0543234	-0.101605	0.24771	0.0300256					0.511871	-0.067817	0.00562682	-0.252363	0.0662908	0.00469877
1.12308	0.207962	0.194785	0.456065	0.106672	0.794692	0.259821	0.410363	0.136989	0.0319888	-0.114451	0.204552	-0.174338	0.00495026	0.0994611	-0.0791169	0.152302	0.125159			0.61052	0.0648658	-0.37586	0.302516	-0.0474566	0.197224	0.0861328	0.0669685	0.151996	0.18388	-0.0961838	0.0851615	0.1292	0.0133284	0.915009	0.714928	0.0580394	-0.114787	0.230016	0.031457					0.548081	-0.0692125	0.0101552	-0.249118	0.0657737	0.00734518
1.12167	0.207724	0.19268	0.455769	0.123974	0.734183	0.239061	0.393164	0.125415	0.0439075	-0.121318	0.192578	-0.17051	0.0215789	0.13676	-0.0790837	0.154789	0.124087			0.623074	0.0626915	-0.371696	0.293388	-0.0560111	0.231501	0.0757719	0.111055	0.117398	0.221744	-0.0918024	0.078602	0.119029	0.00925541	0.917475	0.768107	0.0695339	-0.105051	0.233341	0.0316799					0.613524	-0.0699577	0.00787045	-0.240257	0.0637997	0.00617954
1.08266	0.25869	0.19273	0.459594	0.101768	0.68667	0.21728	0.395082	0.112912	0.0540151	-0.0880782	0.174527	-0.194282	0.0503462	0.136891	-0.0781434	0.14677	0.121689			0.612285	0.0612891	-0.345317	0.274561	-0.0730772	0.255796	0.121433	0.0852426	0.179496	0.245601	-0.0820129	0.0891551	0.115288	-0.0122773	0.917258	0.816085	0.0637592	-0.101781	0.224954	0.030808					0.650345	-0.0676883	0.00390196	-0.234291	0.0619028	0.00700625
1.09789	0.270032	0.180167	0.444738	0.119695	0.761649	0.200945	0.411477	0.0958248	0.0716469	-0.0784867	0.155709	-0.210331	-0.0441369	0.136649	-0.0777576	0.140515	0.121594			0.616105	0.0477165	-0.332032	0.257574	-0.0664576	0.250845	0.117938	0.0877339	0.0617274	0.278795	-0.0759829	0.0991677	0.120017	0.00737825	0.874624	0.838588	0.0705286	-0.110077	0.220195	0.0356208					0.605208	-0.0694811	0.00402386	-0.206074	0.0620106	0.00769848
1.02004	0.340099	0.167681	0.458164	0.112818	0.819015	0.181633	0.435082	0.077034	0.0874179	-0.0721971	0.136881	-0.216504	-0.0119442	0.147224	-0.0796225	0.144534	0.119516			0.599741	0.0502801	-0.325648	0.232733	-0.0655911	0.231878	0.16263	0.104978	0.0907675	0.309056	-0.0680875	0.0987273	0.121896	0.00632449	0.817212	0.836591	0.0468909	-0.108012	0.213227	0.0314599					0.616358	-0.0701608	-0.00208961	-0.185137	0.058795	0.00722483
0.974425	0.375629	0.143857	0.46851	0.129025	0.884717	0.185837	0.407961	0.0562102	0.0839409	-0.0704166	0.114082	-0.208492	0.0589081	0.147224	-0.0809935	0.136217	0.113373			0.562727	0.0406066	-0.304381	0.209589	-0.0628927	0.257737	0.157499	0.111105	-0.0989856	0.345137	-0.0722957	0.0977585	0.12941	0.00872127	0.847129	0.833472	0.0501221	-0.110347	0.203659	0.0392876					0.682343	-0.0707153	0.000265236	-0.172763	0.0561748	0.00614897
0.96855	0.430941	0.180293	0.46188	0.115453	0.931605	0.170854	0.418281	0.0594699	0.0857134	-0.0978957	0.0939902	-0.198009	0.090087	0.152194	-0.0832606	0.159537	0.109672			0.597464	0.0440564	-0.321766	0.18371	-0.0571213	0.244883	0.185276	0.109465	-0.0779505	0.393134	-0.0745321	0.111248	0.124909	0.0392194	0.827259	0.831739	0.0521524	-0.11139	0.198878	0.0385319					0.629974	-0.0755065	0.000632994	-0.170661	0.0568674	0.0086305
0.959604	0.492122	0.217985	0.464239	0.0904082	0.961722	0.124965	0.423124	0.0407979	0.0940577	-0.120598	0.0761199	-0.218441	0.123396	0.160365	-0.0832795	0.138904	0.106898			0.564891	0.044932	-0.326622	0.158848	-0.0533989	0.273876	0.17056	0.09819	-0.0970668	0.407654	-0.078116	0.118017	0.127679	0.0750764	0.863499	0.88374	0.0421042	-0.116151	0.192928	0.0373496					0.632908	-0.0792383	0.00125868	-0.177248	0.0546302	0.00752225
0.882015	0.495357	0.251736	0.466352	0.0773672	0.958766	0.193487	0.429896	0.0546409	0.0880056	-0.130105	0.0504916	-0.241839	0.0780468	0.157175	-0.0847319	0.147027	0.106064			0.576021	0.0450484	-0.328722	0.145003	-0.0414113	0.287331	0.17218	0.0669495	-0.0765403	0.415786	-0.0872304	0.134811	0.122463	0.0831646	0.828223	0.908067	0.0513932	-0.118994	0.197633	0.0326766					0.614773	-0.0829041	-0.0029587	-0.199789	0.0506541	0.00618917
0.87544	0.558736	0.272896	0.454636	0.0654567	0.944101	0.22682	0.423682	0.072673	0.0859696	-0.118856	0.0274058	-0.242446	0.107705	0.119483	-0.0844021	0.140735	0.105068			0.579439	0.0470989	-0.307607	0.135695	-0.0353831	0.269506	0.18461	0.0660136	-0.0558088	0.411418	-0.0898219	0.151313	0.12564	0.0596802	0.822773	0.873686	0.0355384	-0.132195	0.190468	0.0317404					0.564338	-0.0828543	0.00227313	-0.221607	0.0499011	0.0062772
0.874099	0.554372	0.283827	0.4405	0.074108	0.859772	0.236144	0.416684	0.0750178	0.0885153	-0.128603	0.0035659	-0.242385	0.12576	0.14994	-0.0839885	0.143709	0.106008			0.614355	0.0481394	-0.313678	0.142204	-0.0258822	0.229375	0.111517	0.081126	-0.183605	0.401969	-0.0979718	0.152109	0.123814	0.031138	0.845929	0.808896	0.0304685	-0.13942	0.187256	0.0323441					0.564457	-0.0867984	0.00593608	-0.236769	0.0485637	0.00531618
0.804453	0.558773	0.235708	0.438486	0.0547613	0.781854	0.253201	0.392449	0.0784632	0.0954943	-0.112125	-0.0251187	-0.274408	0.0918012	0.156773	-0.085007	0.147817	0.106508			0.552664	0.0579916	-0.294515	0.144489	-0.0274053	0.250866	0.0940692	0.0197921	-0.0579822	0.391848	-0.106991	0.162004	0.114816	0.0180384	0.885793	0.815394	0.023127	-0.138349	0.184519	0.0282816					0.563893	-0.0788606	0.00608976	-0.250123	0.0503983	0.00638472
0.842728	0.52733	0.249299	0.417335	0.0599666	0.688912	0.263413	0.39899	0.0962626	0.084361	-0.135759	-0.055758	-0.244231	0.0425237	0.146934	-0.0833521	0.184672	0.105655			0.562197	0.0496109	-0.293503	0.153363	-0.0301405	0.280031	0.0286864	-0.0338966	-0.175963	0.384568	-0.118403	0.157807	0.142016	0.00596255	0.823031	0.848003	0.0637257	-0.141802	0.189488	0.0335198					0.550879	-0.0824286	0.00955537	-0.25753	0.052231	0.00705918
0.882416	0.529905	0.276372	0.40591	0.0373165	0.590073	0.29045	0.391303	0.085003	0.0861095	-0.11342	-0.0867826	-0.23022	-0.152149	0.142643	-0.0836712	0.218318	0.107193			0.556127	0.05654	-0.298146	0.1645	-0.0202686	0.24797	-0.018819	-0.0518052	-0.112105	0.370561	-0.126039	0.163672	0.142505	-0.00715006	0.788393	0.845339	0.065698	-0.139098	0.188423	0.0278285					0.556579	-0.0760822	0.0152112	-0.257982	0.0508031	0.00620817
0.916696	0.507384	0.301653	0.401256	0.0476862	0.491304	0.29892	0.366799	0.085726	0.0836736	-0.104401	-0.118004	-0.181444	-0.118129	0.133471	-0.0816711	0.199219	0.107721			0.557258	0.0527175	-0.265271	0.16539	-0.0177264	0.244694	-0.0392396	-0.0929401	-0.0980976	0.325476	-0.132422	0.150506	0.146285	-0.0218054	0.822104	0.836484	0.0940153	-0.137134	0.192911	0.0238704					0.568727	-0.0727534	0.0126492	-0.24574	0.0521243	0.00548816
0.951548	0.454989	0.265747	0.393231	0.0630081	0.408451	0.347421	0.345073	0.128184	0.0435259	-0.0977052	-0.149921	-0.168628	-0.127223	0.116851	-0.0800461	0.201492	0.105745			0.567733	0.0475283	-0.223678	0.177243	-0.00497883	0.235698	-0.0160931	-0.15502	-0.0801799	0.303337	-0.136919	0.153955	0.14781	-0.0222801	0.847606	0.775129	0.0968845	-0.137835	0.189781	0.0298159					0.54964	-0.0701732	0.0120578	-0.233807	0.0509325	0.00589184
0.992457	0.489402	0.276733	0.379395	0.0759442	0.413817	0.352919	0.364304	0.0948298	0.0375568	-0.0824553	-0.174086	-0.138548	-0.0499883	0.120592	-0.0785983	0.19733	0.103503			0.602598	0.0444275	-0.183732	0.1894	-0.0207746	0.215111	-0.0280315	-0.171245	-0.0662164	0.27732	-0.139663	0.148108	0.150628	-0.033182	0.866726	0.730118	0.0866759	-0.139704	0.196926	0.0350792					0.611261	-0.0695216	0.00843325	-0.209035	0.0536242	0.00567356
0.999515	0.467197	0.273448	0.372362	0.0852381	0.433405	0.309975	0.393147	0.0935229	0.0389085	-0.100412	-0.208921	-0.134753	-0.111531	0.125182	-0.0778502	0.198705	0.101143			0.603466	0.0370151	-0.197312	0.197285	-0.0189537	0.231343	-0.0235289	-0.221966	-0.0809027	0.248917	-0.148228	0.143853	0.152493	0.000938575	0.933961	0.689794	0.0840126	-0.126362	0.195947	0.0274643					0.604752	-0.0717314	0.00180279	-0.194615	0.0609967	0.00789189
1.00934	0.470358	0.273994	0.361348	0.0954469	0.44659	0.319245	0.382165	0.0936323	0.0344036	-0.128003	-0.238963	-0.127816	-0.108584	0.118439	-0.0783261	0.206639	0.0955075			0.547342	0.0393263	-0.161367	0.202845	-0.0197117	0.268211	0.0345984	-0.182182	-0.0156327	0.243633	-0.152488	0.128699	0.163205	0.00931435	0.911096	0.67395	0.0990274	-0.115933	0.190981	0.0264918					0.651694	-0.0729434	-0.00457206	-0.193039	0.0701761	0.00810595
1.05288	0.46099	0.280302	0.355718	0.0894579	0.463772	0.301138	0.377777	0.0941177	0.026	-0.141288	-0.264461	-0.108465	-0.0514096	0.121589	-0.0784723	0.224906	0.0892091			0.573952	0.035355	-0.172099	0.199538	-0.0158412	0.235566	0.0927872	-0.155142	-0.0374031	0.232075	-0.151703	0.12207	0.169243	0.0260396	0.879296	0.636213	0.0946645	-0.116325	0.187646	0.0272521					0.672864	-0.0765176	-0.0106497	-0.196677	0.0823924	0.0071511
1.0539	0.433139	0.229516	0.353624	0.0851653	0.480044	0.259296	0.325143	0.0943998	0.0192942	-0.139594	-0.289472	-0.0814884	-0.0354007	0.123113	-0.0784871	0.19769	0.0856622			0.573563	0.0414614	-0.1589	0.179363	-0.0126481	0.205694	0.136209	-0.159551	0.0311267	0.230619	-0.136778	0.130062	0.141751	0.0504431	0.924191	0.630191	0.0705644	-0.104657	0.179093	0.0241675					0.696088	-0.077261	-0.0150885	-0.194286	0.0984799	0.00759169
1.01427	0.387523	0.167285	0.350731	0.0810548	0.508827	0.246873	0.330174	0.0983102	0.00913054	-0.156671	-0.314317	-0.102997	0.0355595	0.169111	-0.076354	0.178849	0.0789152			0.559423	0.0349421	-0.152642	0.173807	-0.0265708	0.201976	0.165291	-0.131987	0.024327	0.217144	-0.135524	0.136535	0.131303	0.0675345	0.938594	0.631817	0.0658926	-0.10714	0.176875	0.0271853					0.636495	-0.0874625	-0.025161	-0.187861	0.12014	0.00701964
1.01304	0.377839	0.115182	0.353514	0.0693806	0.548784	0.261188	0.314228	0.0909848	0.0036465	-0.154516	-0.342881	-0.12353	0.0485025	0.206272	-0.0767602	0.182872	0.0707611			0.516701	0.0341676	-0.239783	0.178524	-0.0238936	0.210541	0.103897	-0.136526	0.0817589	0.206479	-0.123935	0.14485	0.132594	0.0482622	0.961524	0.643749	0.0428315	-0.109146	0.173631	0.0306737					0.62592	-0.0898855	-0.0301922	-0.187939	0.140214	0.00931677
0.977971	0.374609	0.121186	0.348659	0.0501223	0.593202	0.265716	0.300552	0.0542811	0.0245086	-0.157183	-0.371058	-0.126074	0.101779	0.21318	-0.0773064	0.177326	0.064942			0.553764	0.0338362	-0.247627	0.168481	-0.0280161	0.176392	0.0435439	-0.118402	0.0466158	0.201795	-0.13219	0.135693	0.137098	0.0266105	0.911974	0.705405	0.0436567	-0.0972575	0.17247	0.0324486					0.644178	-0.0923169	-0.0323932	-0.201812	0.165104	0.0100484
0.971408	0.32875	0.0723739	0.350732	0.031792	0.562334	0.216037	0.263383	0.0635432	0.0483685	-0.18353	-0.398337	-0.119004	0.071509	0.207493	-0.0773909	0.177302	0.0600337			0.497945	0.0364965	-0.280886	0.160581	-0.0215485	0.161864	0.0232324	-0.0571089	0.008236	0.207462	-0.134057	0.137129	0.140293	0.0358901	0.945915	0.764105	0.0570879	-0.084958	0.166488	0.0322564					0.591747	-0.0898662	-0.0342407	-0.215232	0.186498	0.00788108
0.930809	0.293464	0.032256	0.345747	0.0169565	0.57202	0.183498	0.228829	0.0430345	0.0539194	-0.164306	-0.419817	-0.150546	0.138579	0.210266	-0.0783895	0.183868	0.0542785			0.530416	0.0310394	-0.325539	0.153228	-0.0282389	0.125059	-0.00613188	0.0233531	0.0135477	0.215649	-0.142563	0.141984	0.138687	0.0171965	0.886	0.816083	0.062386	-0.0971717	0.172746	0.0334485					0.601973	-0.0929859	-0.0361125	-0.228525	0.207279	0.00642247
0.913764	0.268463	-0.0198291	0.344666	0.000931281	0.586214	0.151912	0.23133	0.00711223	0.0772258	-0.156723	-0.44032	-0.131293	0.188252	0.179835	-0.0773379	0.187424	0.0525489			0.58571	0.0229106	-0.336473	0.147362	-0.0162401	0.0874977	-0.0145138	-0.0393901	0.010774	0.204748	-0.140808	0.153071	0.124693	0.038078	0.867722	0.891645	0.0518411	-0.0951844	0.176683	0.0273548					0.541677	-0.0930094	-0.0349022	-0.230774	0.224518	0.00765343
0.901886	0.279251	-0.0110269	0.339768	0.0255713	0.610251	0.159881	0.217225	0.0206033	0.0817124	-0.16516	-0.460464	-0.119192	0.242743	0.179601	-0.076523	0.167163	0.0490067			0.604554	0.0199017	-0.315158	0.156839	-0.0249957	0.0845797	-0.0402724	-0.0572695	0.00927539	0.203771	-0.15187	0.155731	0.124201	0.0216847	0.877362	0.943425	0.0517132	-0.0862282	0.182604	0.0212497					0.537195	-0.0948643	-0.0328512	-0.233975	0.237583	0.00709769
0.959931	0.313677	0.0498846	0.341218	0.0265731	0.653484	0.186197	0.222874	0.0200339	0.0891368	-0.168276	-0.477854	-0.166791	0.258134	0.1874	-0.0763861	0.159137	0.0455241			0.593381	0.0188476	-0.314665	0.169889	-0.0207068	0.11127	-0.0202497	-0.0403613	-0.067446	0.198832	-0.169954	0.153791	0.127573	0.0260825	0.87458	0.980243	0.0707059	-0.100525	0.184896	0.0213097					0.528555	-0.091632	-0.0292199	-0.24668	0.247159	0.00760165
0.989529	0.331347	0.0723802	0.328996	0.0278188	0.691344	0.171222	0.202435	0.0339363	0.0836073	-0.171825	-0.494233	-0.141204	0.222121	0.155558	-0.0774075	0.164082	0.043378			0.608789	0.0203116	-0.287787	0.163115	-0.0213809	0.117728	-0.0130484	-0.0437932	-0.146851	0.196407	-0.1775	0.147887	0.132419	0.0435703	0.887632	0.98351	0.0772655	-0.0967692	0.188364	0.0246129					0.527782	-0.0898255	-0.0320075	-0.263686	0.254069	0.0081989
0.916159	0.319949	0.0889199	0.320353	0.0274677	0.721369	0.151965	0.202653	0.0197969	0.0995786	-0.165027	-0.509909	-0.146904	0.144182	0.160786	-0.0775013	0.157731	0.0425919			0.665455	0.0273552	-0.27151	0.16249	-0.0208655	0.113101	0.0519182	-0.00468533	-0.190156	0.202762	-0.194541	0.147587	0.135422	0.058194	0.888993	0.996226	0.0864877	-0.0849295	0.185948	0.0276423					0.586442	-0.0926127	-0.0296541	-0.277176	0.255475	0.0047109
0.905578	0.33846	0.100702	0.312609	0.0507975	0.737457	0.150838	0.241592	0.0333061	0.09857	-0.149223	-0.520969	-0.152483	0.0534042	0.157229	-0.078108	0.154695	0.0408004			0.624643	0.0295867	-0.247449	0.172047	-0.0246225	0.114819	0.0898922	0.00183628	-0.232982	0.211147	-0.184102	0.151138	0.130409	0.0710514	0.87224	1.00568	0.084208	-0.0835841	0.180707	0.032111					0.569161	-0.0906702	-0.031269	-0.271473	0.25281	0.00581842
0.902642	0.351613	0.11685	0.293201	0.0700762	0.766355	0.136279	0.23643	0.0231821	0.0956689	-0.157534	-0.530753	-0.165702	0.0561965	0.166533	-0.07849	0.167872	0.0393923			0.614947	0.0218184	-0.216659	0.166886	-0.0296674	0.116052	0.0788119	-0.0559659	-0.157526	0.19594	-0.18587	0.151538	0.125977	0.062641	0.911765	0.991357	0.0816442	-0.0922626	0.175358	0.0329415					0.559359	-0.0915615	-0.0285156	-0.283358	0.254109	0.00817901
0.931682	0.338117	0.138544	0.275603	0.0863054	0.756634	0.185558	0.253487	0.0262736	0.0916455	-0.151956	-0.538521	-0.156635	0.00218944	0.162814	-0.0761008	0.183823	0.0420937			0.578895	0.0225254	-0.104807	0.172644	-0.0212891	0.111064	0.0498316	-0.0867752	-0.243496	0.197217	-0.179509	0.147962	0.121449	0.0712737	0.979953	0.976351	0.0921765	-0.0840199	0.168407	0.0433892					0.554209	-0.0918716	-0.027168	-0.288303	0.253045	0.00679783
0.93825	0.349893	0.158612	0.259146	0.104907	0.723175	0.18196	0.236962	0.0581266	0.0774545	-0.155832	-0.546192	-0.173492	-0.119053	0.160811	-0.0770986	0.181557	0.0448399			0.569239	0.0278379	-0.082893	0.167954	-0.0305939	0.150099	0.0925606	-0.0357886	-0.287735	0.199085	-0.182572	0.151313	0.128304	0.0633093	0.999901	0.914399	0.0957346	-0.0980563	0.165736	0.0518597					0.566849	-0.0941126	-0.0296414	-0.278921	0.250279	0.00508179
0.932748	0.369451	0.185715	0.227715	0.108011	0.68915	0.183446	0.237614	0.054761	0.0857049	-0.137943	-0.552337	-0.202713	-0.208723	0.150115	-0.076976	0.196835	0.0506331			0.59101	0.0309003	-0.0527435	0.155366	-0.0322509	0.158027	0.0575459	-0.0224383	-0.220293	0.209826	-0.168166	0.149388	0.132811	0.084243	1.0234	0.86728	0.0970432	-0.100091	0.159699	0.052216					0.57083	-0.0908868	-0.0270426	-0.279214	0.250987	0.00703633
0.858999	0.342035	0.156843	0.179085	0.129678	0.649014	0.18364	0.235354	0.0232177	0.116862	-0.125419	-0.559112	-0.175639	-0.196884	0.181406	-0.0772934	0.237064	0.0547872			0.616987	0.0343128	-0.0124307	0.145956	-0.039838	0.126317	-0.011747	-0.0320969	-0.102267	0.220173	-0.162956	0.149608	0.131748	0.05666	1.00948	0.81577	0.0935874	-0.0859472	0.157911	0.0474251					0.616218	-0.0920274	-0.0265064	-0.286995	0.249493	0.00859907
0.929142	0.357648	0.18372	0.148882	0.150548	0.606079	0.184332	0.2327	0.0182076	0.139765	-0.10145	-0.563479	-0.172931	-0.202609	0.178463	-0.0770069	0.233515	0.0635757			0.619745	0.0354415	0.0135401	0.14525	-0.0398787	0.0975365	-0.168398	-0.0393136	-0.0564847	0.227141	-0.162127	0.143341	0.135964	0.0714946	0.968856	0.82534	0.0778744	-0.0767203	0.153587	0.0468488					0.684425	-0.0942059	-0.0195566	-0.287644	0.243219	0.00797702
0.961018	0.376376	0.202255	0.12199	0.173522	0.566806	0.151686	0.270107	0.0216064	0.132793	-0.114201	-0.565751	-0.180405	-0.228982	0.131783	-0.0741779	0.249867	0.0695834			0.581708	0.0309183	0.0990849	0.13693	-0.0405225	0.0636913	-0.234596	-0.0337715	-0.0422051	0.234036	-0.162338	0.149468	0.129272	0.102131	0.96404	0.78245	0.0687123	-0.075949	0.145958	0.0473871					0.636999	-0.0957947	-0.0183456	-0.280465	0.240495	0.0080339
1.0328	0.380467	0.222333	0.0973886	0.175028	0.536977	0.160613	0.22647	-0.00209571	0.167525	-0.115939	-0.570802	-0.186256	-0.262486	0.133058	-0.0743993	0.258637	0.0793757			0.640999	0.0326459	0.120942	0.127205	-0.0454418	0.0689649	-0.264335	-0.0310115	0.0711876	0.227725	-0.164366	0.155663	0.12772	0.0898415	0.981842	0.769706	0.0570992	-0.0854019	0.152734	0.0428656					0.659166	-0.0986485	-0.0106857	-0.289959	0.237781	0.0062522
1.01895	0.380499	0.239798	0.0755866	0.176283	0.501195	0.189549	0.224009	-0.0292672	0.194967	-0.116967	-0.572433	-0.198398	-0.169897	0.127396	-0.0699983	0.260247	0.0870311			0.629629	0.0396897	0.128321	0.130701	-0.0354859	0.0704306	-0.258448	-0.0293504	-0.071106	0.226619	-0.165846	0.152985	0.128469	0.0836518	0.902888	0.772447	0.0433241	-0.0768091	0.159494	0.0361527					0.691409	-0.102562	-0.0109152	-0.288183	0.231711	0.00539623
1.08955	0.414783	0.249941	0.0608183	0.185413	0.459393	0.170523	0.200777	-0.0305268	0.195823	-0.128935	-0.578691	-0.182318	-0.154286	0.125514	-0.0678966	0.250672	0.09514			0.630623	0.036573	0.117431	0.122429	-0.0512063	0.0725387	-0.252068	-0.0508005	0.0344	0.230769	-0.167738	0.151687	0.138506	0.0862213	0.829965	0.774676	0.0436237	-0.0846039	0.156998	0.0266708					0.713066	-0.100165	-0.00418789	-0.2878	0.226187	0.0051654
1.12005	0.367932	0.215156	0.0455535	0.167315	0.438429	0.150569	0.203248	-0.0220617	0.167047	-0.111942	-0.581156	-0.164428	-0.122241	0.124082	-0.0633755	0.251821	0.10443			0.663583	0.0341359	0.0436365	0.116585	-0.057967	0.0367901	-0.277617	-0.0631765	0.161714	0.220966	-0.160666	0.149856	0.136046	0.119042	0.843938	0.760854	0.0431106	-0.0682002	0.163067	0.0253199					0.741245	-0.094599	0.000588003	-0.29246	0.223643	0.00558737
1.11766	0.355783	0.218385	0.0646456	0.170828	0.413929	0.121695	0.219787	-0.0374895	0.169807	-0.10819	-0.583012	-0.135924	-0.0525382	0.165539	-0.0565953	0.246273	0.114994			0.652142	0.0269735	-0.0430744	0.128978	-0.0426855	0.0264286	-0.223328	-0.0212609	0.152665	0.210784	-0.162388	0.148337	0.131582	0.0953383	0.801351	0.782255	0.0439951	-0.0606113	0.17035	0.0306522					0.809968	-0.0947739	-0.00216184	-0.296066	0.220464	0.00609171
1.07435	0.361919	0.226697	0.0848302	0.171597	0.393628	0.0779305	0.259885	-0.0115663	0.142733	-0.117978	-0.582	-0.139879	-0.0531771	0.125977	-0.0517546	0.21175	0.127872			0.629522	0.0242418	-0.14165	0.131014	-0.0361483	0.0348003	-0.15358	0.0367978	0.122338	0.191237	-0.160051	0.151791	0.128685	0.116905	0.807876	0.794782	0.0305159	-0.0595494	0.175463	0.0398032					0.774894	-0.0970818	0.00079036	-0.28938	0.215831	0.00477086
1.06914	0.336769	0.213958	0.0901467	0.180041	0.370223	0.0803816	0.254563	-0.0249042	0.127255	-0.144638	-0.582644	-0.135031	-0.0270901	0.123966	-0.047207	0.205759	0.136718			0.654344	0.0272591	-0.108945	0.143847	-0.0264613	0.0756531	-0.0521284	0.0615587	0.170563	0.190184	-0.160713	0.152881	0.136029	0.0988818	0.822221	0.774384	0.0365836	-0.0559163	0.180065	0.0354636					0.742179	-0.0912787	0.00374315	-0.294132	0.213326	0.00561013
1.02798	0.31776	0.209252	0.0937021	0.161885	0.349572	0.130021	0.214112	-0.00536812	0.124149	-0.142537	-0.58352	-0.14227	0.0579138	0.130237	-0.0411095	0.194903	0.151344			0.661953	0.0259272	-0.0947845	0.153904	-0.0308369	0.078306	0.0471629	0.0291135	0.0846708	0.180601	-0.159418	0.149974	0.138665	0.0792857	0.867379	0.82913	0.0398859	-0.0529239	0.188459	0.035299					0.762633	-0.0874746	0.00837982	-0.300253	0.212068	0.00433026
1.02285	0.291437	0.196578	0.105873	0.143948	0.327702	0.0937063	0.21001	0.0160492	0.0974194	-0.158456	-0.582134	-0.133677	0.124926	0.131136	-0.0310065	0.192149	0.164731			0.597106	0.0194276	-0.175001	0.158884	-0.0335823	0.0790063	0.101101	0.00280253	0.0347023	0.181107	-0.163851	0.139184	0.135179	0.0797883	0.864089	0.806196	0.0506054	-0.0408844	0.193369	0.0353806					0.783332	-0.0794834	0.00886127	-0.294677	0.214197	0.00426359
1.02649	0.281409	0.191764	0.123334	0.129413	0.29	0.0557101	0.206347	0.0486696	0.0698183	-0.127579	-0.585423	-0.135391	-0.00687515	0.133265	-0.0252155	0.173002	0.184542			0.646212	0.0169214	-0.188331	0.150798	-0.0417612	0.0783444	0.121835	-0.0194059	0.155749	0.192309	-0.144635	0.13175	0.139096	0.0976711	0.881005	0.778148	0.0570727	-0.0362841	0.180247	0.0359265					0.848665	-0.0770474	0.0089663	-0.297504	0.213455	0.0059906
0.983089	0.246068	0.183626	0.166631	0.134059	0.249922	0.0681673	0.204342	0.0109253	0.100974	-0.117557	-0.586024	-0.127342	0.0190489	0.140853	-0.0205528	0.168726	0.200491			0.704944	0.0254223	-0.183533	0.140871	-0.00411623	0.0756751	0.151281	0.0208183	0.070532	0.18822	-0.144917	0.124586	0.137143	0.0782292	0.897309	0.775927	0.0521548	-0.0252312	0.197227	0.04259					0.855954	-0.0748413	0.00750781	-0.295301	0.212081	0.00520527
0.934109	0.255527	0.223913	0.184832	0.165119	0.218937	0.0413136	0.195733	0.0182455	0.0992819	-0.134134	-0.589389	-0.140147	-0.0122759	0.149082	-0.0172347	0.169627	0.214518			0.730164	0.031158	-0.177641	0.134645	0.00883178	0.0778238	0.119587	0.0405086	0.0876998	0.189332	-0.152014	0.126341	0.136052	0.071503	0.93743	0.803076	0.0428402	-0.0250963	0.196108	0.0442075					0.83594	-0.0735153	0.00497224	-0.299133	0.212854	0.00505508
0.926663	0.225965	0.214073	0.209281	0.167732	0.18905	0.0608364	0.204617	0.00705235	0.0905185	-0.152709	-0.592315	-0.158385	-0.0118592	0.11053	-0.0118574	0.172389	0.229336			0.76938	0.0464574	-0.175501	0.115207	0.00549257	0.0840702	0.110473	0.0160162	0.0752534	0.182871	-0.152298	0.128927	0.142532	0.0955569	0.981259	0.775026	0.0395387	-0.0391099	0.190099	0.0474459					0.779315	-0.0721403	0.00592485	-0.301055	0.21292	0.00354944
0.964886	0.207134	0.202798	0.231011	0.173921	0.158689	0.108401	0.159656	0.0204864	0.0667024	-0.139074	-0.597791	-0.170401	0.135287	0.108617	-0.00460339	0.171709	0.247503			0.799259	0.0558528	-0.154979	0.111857	0.00372531	0.065386	-0.0659367	-0.00823548	0.0129728	0.196295	-0.161786	0.125803	0.159301	0.0933608	0.977165	0.782153	0.0460539	-0.0482174	0.186341	0.0473818					0.79312	-0.0706121	0.00407971	-0.306767	0.208949	0.00270944
0.960641	0.192233	0.203282	0.261842	0.17151	0.141646	0.0999709	0.189717	0.0366947	0.0852686	-0.13642	-0.601358	-0.196541	0.104779	0.114002	0.00195666	0.167443	0.269543			0.796089	0.045589	-0.143954	0.0926538	-0.0039077	0.0415716	0.000273285	-0.00128572	-0.0410849	0.201408	-0.158344	0.125054	0.148422	0.0711579	0.965918	0.781439	0.0304863	-0.049216	0.184662	0.0482803					0.783627	-0.0713917	0.000631319	-0.306725	0.208541	0.00338529
0.996818	0.175367	0.202133	0.288861	0.194597	0.112959	0.0749811	0.207105	0.023638	0.0904729	-0.130586	-0.605827	-0.19936	0.0552922	0.124536	0.00644867	0.161432	0.28722			0.786638	0.0474182	-0.0983814	0.0767958	0.00332224	0.034291	0.00987578	-0.0220276	0.0393336	0.205617	-0.155457	0.1201	0.148483	0.0510522	0.923151	0.779478	0.0300713	-0.0466098	0.17993	0.0422104					0.771577	-0.0729666	-0.00333577	-0.3071	0.209504	0.00432009
0.973396	0.161388	0.193989	0.307043	0.220279	0.0924001	0.0834088	0.204887	0.0128548	0.0876209	-0.119104	-0.610163	-0.198597	-0.0166895	0.13651	0.00683044	0.160843	0.306016			0.847729	0.0520487	-0.0154021	0.0729606	0.0343074	0.0175143	0.0847657	0.0418518	0.0975493	0.198085	-0.150045	0.133695	0.158069	0.0588229	0.889509	0.784633	0.0341988	-0.0442417	0.175779	0.041912					0.749585	-0.0808882	-0.0024731	-0.313405	0.209364	0.00428395
0.976909	0.155884	0.18731	0.323915	0.242581	0.0796043	0.131888	0.208114	0.0275244	0.0686561	-0.129503	-0.612284	-0.203173	0.00252305	0.151525	0.009988	0.176448	0.324023			0.838465	0.054888	0.0401638	0.0736777	0.0427448	0.014199	0.091341	0.060985	0.155273	0.183045	-0.154164	0.137691	0.167742	0.0548448	0.851337	0.831719	0.0495748	-0.0434492	0.181882	0.048089					0.685813	-0.0740277	0.00069098	-0.3148	0.207414	0.00284053
0.911261	0.177181	0.18358	0.304751	0.239948	0.0673543	0.135663	0.223588	0.0670261	0.0384992	-0.123781	-0.614688	-0.228459	-0.0806643	0.155585	0.0168012	0.188216	0.347791			0.82161	0.0532667	-0.027662	0.0865893	0.0114545	0.00625157	0.141193	0.102465	0.303681	0.183955	-0.130167	0.146449	0.162295	0.0693552	0.81781	0.867237	0.0427018	-0.0377837	0.167003	0.0437363					0.680728	-0.0754939	0.000866715	-0.315264	0.204048	0.00515585
0.919061	0.16458	0.18268	0.337398	0.231948	0.0640596	0.189324	0.249842	0.0576717	0.0462193	-0.108593	-0.616015	-0.232656	-0.0691538	0.14717	0.0224936	0.186097	0.371098			0.779707	0.0476503	-0.0261439	0.0860863	0.00891478	0.00169545	0.174483	0.150907	0.279015	0.194421	-0.12612	0.138642	0.16843	0.0640587	0.759292	0.888273	0.052216	-0.0347761	0.163965	0.0452934					0.688825	-0.0791523	-0.00172165	-0.315378	0.20051	0.00627309
0.97238	0.164049	0.175092	0.327131	0.221507	0.0504068	0.197769	0.228663	0.0628109	0.0482598	-0.102294	-0.607801	-0.228581	-0.0626162	0.159529	0.0226549	0.174936	0.39089			0.726572	0.0468862	-0.00351185	0.0827543	0.00319104	0.00360725	0.182586	0.148085	0.172038	0.20314	-0.12741	0.12966	0.162968	0.0595207	0.73739	0.949994	0.0511212	-0.0168552	0.171657	0.0437954					0.699	-0.0821078	0.00086453	-0.315436	0.19443	0.00672891
0.979244	0.193915	0.194893	0.33418	0.208405	0.0274926	0.191397	0.249784	0.0191757	0.0929161	-0.111749	-0.602406	-0.21689	-0.188724	0.164017	0.0247962	0.169607	0.404961			0.72157	0.034571	0.0877025	0.0851701	-0.00736271	0.0115572	0.354296	0.125024	0.171396	0.204699	-0.122089	0.127973	0.149229	0.0333561	0.726649	0.949104	0.0436912	-0.00459978	0.164967	0.0446987					0.738949	-0.0811298	-0.00409177	-0.318078	0.193662	0.00904137
0.914997	0.182782	0.185832	0.328427	0.196839	-0.00122359	0.199543	0.229902	0.0193999	0.0661923	-0.102887	-0.603334	-0.21474	-0.176571	0.160738	0.0245613	0.174534	0.4183			0.652751	0.0396968	0.0775478	0.0856393	-0.00654693	0.00832431	0.367228	0.092057	0.299724	0.18727	-0.128746	0.124402	0.143249	0.0253011	0.708919	1.02162	0.0588115	0.000907183	0.158322	0.0451767					0.741716	-0.0843316	-0.00712398	-0.32042	0.189213	0.0103367
0.963232	0.170169	0.172271	0.322463	0.185765	-0.0240262	0.21621	0.218752	0.00624873	0.0610292	-0.108884	-0.602006	-0.17838	-0.0990315	0.15202	0.0227905	0.214137	0.438362			0.643338	0.0448571	0.0718989	0.0862929	-0.00887709	0.0023917	0.369977	0.128608	0.195334	0.184577	-0.127959	0.128658	0.130357	0.0309135	0.728263	1.01161	0.0620374	0.00237177	0.153141	0.0454304					0.732833	-0.0836023	-0.00807362	-0.322585	0.183292	0.0102205
0.952283	0.16917	0.174388	0.312147	0.18102	-0.0516023	0.258738	0.240124	0.0185794	0.0582478	-0.111518	-0.600914	-0.174742	-0.0138062	0.156245	0.028544	0.222164	0.454035			0.618676	0.0460146	0.014566	0.0801696	-0.0296922	-0.0211561	0.148111	0.138877	0.0881563	0.185826	-0.119378	0.127859	0.133882	0.0705287	0.786362	1.04431	0.0424651	0.00336485	0.147292	0.0476973					0.745987	-0.0858109	-0.00932311	-0.319777	0.178893	0.0123967
0.959373	0.159	0.168119	0.312927	0.181541	-0.0772463	0.274584	0.227541	-0.00361769	0.0782522	-0.108993	-0.599482	-0.171323	0.0451588	0.156944	0.0295917	0.227461	0.463012			0.590244	0.0423655	0.0199312	0.0783959	-0.0374829	-0.0281549	0.0946875	0.173398	-0.0477015	0.19951	-0.117568	0.134515	0.120506	0.063837	0.870875	1.04237	0.0334333	0.0037584	0.140959	0.0424404					0.737479	-0.089297	-0.00991	-0.316718	0.178491	0.0114821
1.00386	0.1252	0.161281	0.312	0.175233	-0.0916104	0.301791	0.224681	0.0046497	0.0610515	-0.119666	-0.594185	-0.169613	0.110656	0.158966	0.0297598	0.250282	0.470551			0.567212	0.0493303	0.135569	0.0650291	-0.0333775	-0.0258669	0.0112768	0.0852054	-0.121761	0.182782	-0.127756	0.132556	0.117852	0.0493832	0.896834	1.01622	0.0375201	0.00262959	0.135657	0.0404672					0.7082	-0.0809598	-0.0144595	-0.319083	0.175654	0.011087
1.01523	0.125102	0.160871	0.286698	0.17514	-0.106789	0.307173	0.215586	-0.00639948	0.0583886	-0.123477	-0.593308	-0.165505	0.146262	0.177507	0.04425	0.248013	0.484867			0.533946	0.0491145	0.145322	0.0669085	-0.0394729	-0.0310375	-0.0519148	0.0158695	-0.128904	0.184713	-0.125243	0.14741	0.11867	0.0682338	0.906951	1.08281	0.0320652	0.000349028	0.1275	0.032337					0.700473	-0.081195	-0.0166695	-0.311943	0.170442	0.0119343
0.980819	0.12611	0.168028	0.279101	0.177302	-0.116802	0.256847	0.206092	0.0105058	0.0374336	-0.124599	-0.601998	-0.139214	0.0408301	0.179673	0.0483891	0.252962	0.495913			0.558263	0.0379264	0.13541	0.0726463	-0.0361337	-0.0460305	-0.069436	0.0526191	-0.0276314	0.175075	-0.124481	0.154762	0.119122	0.0896817	0.927305	1.07425	0.030627	-0.00147648	0.121697	0.0276417					0.679488	-0.0801313	-0.0168592	-0.308059	0.165774	0.012227
0.985177	0.0967332	0.148687	0.284498	0.181334	-0.117472	0.261048	0.182789	0.0328657	0.0172291	-0.130247	-0.601585	-0.1587	0.060845	0.158416	0.0658551	0.260206	0.509201			0.537144	0.0387961	0.0636983	0.0669866	-0.0201534	-0.0512757	-0.0901808	0.0646408	0.00650422	0.165865	-0.122442	0.159957	0.121526	0.0947435	0.96554	1.13801	0.040676	7.76976e-05	0.117902	0.0276883					0.674275	-0.0775567	-0.0192442	-0.304764	0.163768	0.0108943
0.989583	0.120672	0.149084	0.298355	0.185284	-0.119707	0.261675	0.186242	-0.00517741	0.0517859	-0.130758	-0.600352	-0.131451	0.0902906	0.165102	0.0710866	0.270152	0.519307			0.575645	0.031622	-0.0256343	0.0601069	-0.0211123	-0.0482334	-0.146112	0.0823624	-0.0837516	0.167267	-0.119065	0.167858	0.132599	0.135593	1.01303	1.10292	0.0452387	0.000268332	0.122384	0.0268981					0.662496	-0.0734368	-0.0155646	-0.300796	0.165701	0.00988564
0.947923	0.14781	0.152715	0.312979	0.191736	-0.117261	0.199519	0.18697	-0.00469656	0.058964	-0.129838	-0.598871	-0.167741	0.0608772	0.177044	0.0777027	0.246791	0.525046			0.538495	0.0240081	-0.12939	0.062704	-0.0220641	-0.0520833	-0.17963	0.0689868	-0.0271865	0.165646	-0.116567	0.182218	0.153139	0.136435	1.00966	1.11542	0.0324204	-0.000431799	0.125955	0.0263606					0.655245	-0.0705007	-0.0115885	-0.295532	0.164645	0.0114508
0.964498	0.178934	0.148447	0.335025	0.187336	-0.122847	0.164513	0.174867	-0.00312563	0.0571432	-0.123638	-0.593288	-0.200665	0.0722524	0.179018	0.0800699	0.245578	0.529719			0.528605	0.0174541	-0.108142	0.068197	-0.0141902	-0.0353412	-0.00689447	0.0559488	0.0288869	0.163687	-0.115328	0.181302	0.148358	0.114805	0.95455	1.09019	0.0514123	-5.201e-05	0.130974	0.0187624					0.683205	-0.0617446	-0.017458	-0.295194	0.159603	0.00907892
0.960466	0.202125	0.153486	0.316564	0.177071	-0.122038	0.137674	0.190127	0.0146344	0.0340602	-0.118994	-0.591529	-0.201132	0.050092	0.177489	0.0874312	0.247983	0.532969			0.541335	0.0205538	-0.142873	0.0619515	-0.00797064	-0.0421113	0.0640758	0.0607434	0.0603093	0.166866	-0.129469	0.190403	0.135536	0.151325	0.919052	1.08385	0.0493505	0.00633897	0.133809	0.0255265					0.679473	-0.0572997	-0.0141488	-0.29036	0.156919	0.0106476
0.952948	0.221709	0.159035	0.306451	0.177456	-0.131356	0.118205	0.183165	0.00476623	0.0287019	-0.119541	-0.589245	-0.189662	0.0591835	0.17238	0.100796	0.221207	0.530645			0.488438	0.00961857	-0.245117	0.0710388	0.00200343	-0.0563359	0.118824	0.108527	0.0960799	0.188436	-0.134719	0.201294	0.148096	0.182406	0.855823	1.08343	0.0499034	0.00891696	0.138349	0.0344777					0.693992	-0.0520015	-0.00890253	-0.283828	0.157521	0.0111997
0.949767	0.247428	0.160683	0.295295	0.176323	-0.142531	0.111107	0.175268	-0.00275451	0.0450581	-0.120056	-0.583495	-0.174189	0.0962241	0.167318	0.0919828	0.218907	0.520809			0.485272	0.0166259	-0.130707	0.0688618	-0.00200485	-0.0736994	0.191735	0.167555	0.0145704	0.195992	-0.131807	0.201451	0.137157	0.161558	0.823296	1.03599	0.0658449	0.0139038	0.147629	0.0353807					0.6854	-0.0290549	-0.00529038	-0.310646	0.156467	0.00975657
0.940995	0.261509	0.159397	0.285393	0.177585	-0.145906	0.138975	0.183623	0.00100529	0.0467615	-0.142207	-0.582216	-0.175367	0.160343	0.164102	0.0951696	0.221437	0.516065			0.461053	0.0226846	-0.11557	0.0659645	0.00338335	-0.0907998	0.0626686	0.156008	-0.0602627	0.207033	-0.127152	0.202265	0.130022	0.142392	0.818197	1.05841	0.0615467	0.0174105	0.13952	0.03338					0.668632	-0.0161383	-0.00759717	-0.331504	0.154444	0.00987998
0.937448	0.268317	0.157434	0.264974	0.176751	-0.152473	0.134574	0.173659	0.00354311	0.0435133	-0.130293	-0.586343	-0.148141	0.121839	0.197909	0.0748108	0.212907	0.510973			0.473871	0.0205447	-0.114719	0.0574715	0.0145369	-0.111458	-0.0632186	0.231236	0.122221	0.215735	-0.124194	0.207409	0.129054	0.176826	0.816783	0.994239	0.0573074	0.0213774	0.141018	0.0259462					0.61146	0.00209189	-0.000710326	-0.349481	0.15217	0.00953629
0.960254	0.251853	0.164667	0.249803	0.17557	-0.157838	0.125552	0.185042	0.0386022	0.0118576	-0.1269	-0.579758	-0.186853	0.1155	0.185988	0.0877504	0.210325	0.502036			0.504036	0.0232816	-0.104979	0.0697446	0.0252524	-0.125815	-0.0266186	0.270639	0.195521	0.232104	-0.115974	0.212546	0.126083	0.175926	0.821038	0.997544	0.0454781	0.0229325	0.133484	0.0317218					0.605149	0.0157406	-0.00118453	-0.357804	0.151166	0.00891489
0.954026	0.240792	0.165498	0.231179	0.169696	-0.168259	0.182495	0.173089	0.0226867	0.0129933	-0.121535	-0.569262	-0.159876	0.117434	0.190104	0.0904292	0.198016	0.491569			0.516011	0.0269812	-0.072854	0.0653788	0.0264537	-0.117733	-0.00368278	0.275842	0.198424	0.245396	-0.119486	0.205319	0.107555	0.196633	0.785115	1.01175	0.0416168	0.0262813	0.126593	0.0388014					0.611181	0.0325987	0.000714178	-0.371144	0.148993	0.00900155
0.898893	0.191463	0.13782	0.204631	0.167902	-0.170028	0.165049	0.153528	0.0101082	0.0159858	-0.126869	-0.573839	-0.164778	0.128295	0.184189	0.0954666	0.197465	0.481449			0.512791	0.0203753	-0.0911239	0.058876	0.0174657	-0.120155	0.010688	0.254649	0.163626	0.254502	-0.125418	0.209232	0.109005	0.21977	0.791394	1.03651	0.0408639	0.0314578	0.117372	0.0478302					0.562999	0.0498652	0.00533937	-0.388521	0.148078	0.0118981
0.922151	0.188728	0.140517	0.207529	0.170441	-0.17989	0.176529	0.156021	0.000568278	0.0401608	-0.136877	-0.571201	-0.142321	0.0855725	0.181725	0.098659	0.183297	0.472766			0.473626	0.0152676	-0.138474	0.0758582	0.0180238	-0.111461	0.0386239	0.270471	0.181102	0.252698	-0.105973	0.207537	0.122829	0.183941	0.805483	1.02258	0.0501821	0.0337512	0.112417	0.0473926					0.595687	0.0670409	0.0063269	-0.400728	0.147301	0.0118519
0.946153	0.209631	0.137912	0.216048	0.16995	-0.179113	0.136336	0.147595	0.00171866	0.0661938	-0.136083	-0.575956	-0.12721	0.11533	0.183826	0.0995602	0.17281	0.464832			0.484539	0.0155266	-0.0805384	0.07452	0.017432	-0.0997977	0.061144	0.283941	0.130351	0.255386	-0.103748	0.206961	0.111719	0.155672	0.815429	1.02475	0.0474859	0.0393102	0.104065	0.0474279					0.582163	0.0722935	0.00917125	-0.407483	0.145631	0.0110218
0.94163	0.216939	0.134124	0.218173	0.168977	-0.17664	0.108541	0.151905	0.0290236	0.0467848	-0.129753	-0.576281	-0.118522	0.117152	0.182484	0.102999	0.170346	0.456132			0.511256	0.00210875	-0.132841	0.0755036	0.0247707	-0.0866964	0.0609476	0.236245	0.14249	0.25309	-0.102887	0.205984	0.129891	0.150394	0.814424	1.03346	0.0393775	0.0478557	0.0909301	0.0443714					0.579341	0.0749869	0.0103804	-0.398188	0.148082	0.0128199
0.983823	0.213454	0.140797	0.228151	0.167361	-0.175342	0.129856	0.155964	0.00936886	0.0494407	-0.11649	-0.575664	-0.157519	0.0509571	0.184612	0.113519	0.168427	0.441507			0.489514	-0.00431432	-0.122244	0.0746963	0.0336311	-0.062845	0.212372	0.245323	0.138844	0.266428	-0.0943032	0.207446	0.133112	0.118856	0.776092	1.01783	0.0530739	0.0560503	0.0929108	0.0506286					0.588425	0.0749658	0.00936648	-0.396287	0.145692	0.0119848
0.976834	0.19219	0.139661	0.226939	0.168156	-0.174173	0.132397	0.175395	0.00527594	0.0547549	-0.116228	-0.56825	-0.193492	0.0857166	0.185046	0.116138	0.184579	0.424625			0.49589	-0.0038342	-0.104252	0.0760531	0.0172946	-0.0477084	0.354142	0.188589	0.0372468	0.272476	-0.0941794	0.199408	0.124139	0.105508	0.774153	1.05914	0.0644615	0.0661566	0.0973921	0.0589615					0.574928	0.073829	0.0148746	-0.37202	0.147134	0.011532
0.948751	0.221481	0.138658	0.212375	0.169178	-0.172318	0.131804	0.141112	-0.00199661	0.0574568	-0.120478	-0.567276	-0.190808	0.0758989	0.227344	0.119029	0.186519	0.411241			0.462703	-0.00798551	-0.109524	0.0691267	0.00970151	-0.0450592	0.386304	0.135885	-0.0637487	0.27662	-0.0916195	0.197983	0.135898	0.090531	0.737305	0.998779	0.0853379	0.0765177	0.102522	0.061157					0.600822	0.0800943	0.0117975	-0.363337	0.146566	0.0113864
1.00123	0.206321	0.109574	0.199056	0.172994	-0.162196	0.0706711	0.128877	0.0102645	0.0607041	-0.117851	-0.571269	-0.225159	0.0904666	0.211275	0.148306	0.194922	0.396254			0.467874	-0.0103982	-0.108248	0.0709685	0.0108791	-0.0452387	0.343741	0.189396	-0.0742702	0.272679	-0.0852647	0.203135	0.156282	0.0766248	0.765987	0.950097	0.102942	0.0853211	0.0994012	0.0616455					0.58083	0.0840473	0.00985389	-0.352648	0.150548	0.0140607
1.03641	0.210156	0.110008	0.190556	0.173244	-0.156301	0.0865325	0.142786	0.00506732	0.0622344	-0.119311	-0.565469	-0.222988	0.0729713	0.219489	0.161297	0.187068	0.382646			0.480052	-0.00749082	-0.0843358	0.0741339	0.0268294	-0.0395761	0.294811	0.144593	-0.0720342	0.272277	-0.0850035	0.207104	0.147714	0.0438404	0.814524	0.920379	0.109315	0.0864843	0.10533	0.0626369					0.565691	0.0823002	0.012323	-0.336244	0.154739	0.0127054
1.00916	0.164485	0.089706	0.18162	0.17431	-0.138257	0.0158445	0.141579	0.00646538	0.0661286	-0.117864	-0.563194	-0.198789	0.113594	0.227498	0.159303	0.192186	0.369521			0.532221	-0.0048941	-0.051805	0.0592552	0.0317645	-0.0420013	0.239715	0.115183	-0.115929	0.270792	-0.0967394	0.209037	0.146255	0.0630835	0.81678	0.908837	0.0934011	0.102874	0.109368	0.0643475					0.522463	0.0755214	-0.00294594	-0.324509	0.154682	0.0137848
1.02934	0.112094	0.0720693	0.180524	0.174669	-0.128111	0.0393735	0.136376	0.00358368	0.070951	-0.120029	-0.558577	-0.192684	0.0874843	0.21912	0.149554	0.197418	0.359392			0.599269	-0.00257597	-0.0887542	0.0492843	0.0370731	-0.0447431	0.195863	0.0917379	-0.0213398	0.276505	-0.0877892	0.205262	0.146377	0.0922478	0.881929	0.902343	0.0844936	0.105771	0.115307	0.0662879					0.526079	0.075942	-0.0196403	-0.319562	0.155251	0.0132403
1.06589	0.0748481	0.0592189	0.164959	0.172965	-0.119385	0.00560233	0.115264	-0.00182947	0.0713582	-0.132392	-0.555017	-0.227361	0.0681206	0.188308	0.150251	0.204069	0.351493			0.551838	0.0034373	-0.12084	0.0480439	0.0411009	-0.0497223	-0.00235693	0.0303134	0.0460364	0.276599	-0.0871805	0.20597	0.131436	0.100033	0.892714	0.919377	0.0836205	0.107141	0.121825	0.0763598					0.50134	0.0655763	-0.0265844	-0.307808	0.156497	0.0118006
1.01829	0.0499224	0.043827	0.13316	0.172039	-0.111394	-0.032994	0.0865511	-0.0054479	0.0926388	-0.115966	-0.549082	-0.226754	0.144755	0.187145	0.140469	0.198412	0.346589			0.575994	0.00461692	-0.106757	0.046029	0.0225942	-0.0606373	-0.029325	-0.000612831	0.0346982	0.26495	-0.102797	0.213042	0.141406	0.118961	0.885606	0.929944	0.0822527	0.125351	0.111485	0.0787273					0.481358	0.0628772	-0.0243572	-0.295882	0.160237	0.0122572
1.04845	0.0320259	0.0286909	0.122342	0.175305	-0.107705	-0.0642065	0.0685136	0.013563	0.062643	-0.120306	-0.54829	-0.221702	0.147967	0.186939	0.155073	0.186818	0.342623			0.534488	0.0116558	-0.0795527	0.0459257	0.023515	-0.0707467	-0.17353	0.0174897	-0.0864045	0.25254	-0.0961486	0.225998	0.15037	0.110584	0.840172	0.879192	0.0819294	0.125618	0.105031	0.0784939					0.478808	0.0554029	-0.0372243	-0.29995	0.162919	0.0121019
1.04516	-0.000431151	-0.0151562	0.0972169	0.177931	-0.0992065	-0.0995355	0.0618466	0.0210449	0.0609817	-0.118953	-0.547346	-0.22674	0.147973	0.15791	0.143018	0.176195	0.338505			0.547619	0.0235009	-0.040284	0.0359558	0.0223935	-0.0726312	-0.238781	0.0730772	-0.0637488	0.246649	-0.0969053	0.231083	0.130788	0.103206	0.888353	0.94098	0.0759219	0.138917	0.0984622	0.0774426					0.476074	0.0485384	-0.04224	-0.302058	0.167426	0.0115423
0.985395	-0.0116966	-0.0144481	0.0511137	0.158054	-0.0960854	-0.0684753	0.0567409	0.0347065	0.0294205	-0.134619	-0.545632	-0.22428	0.136334	0.168964	0.116604	0.168195	0.333892			0.549801	0.023243	-0.0323067	0.0216596	0.0271744	-0.0796634	-0.28035	0.0314077	-0.0908727	0.235319	-0.0987585	0.234358	0.108338	0.101219	0.838008	0.973347	0.0755406	0.158797	0.102516	0.0763469					0.514572	0.0429495	-0.0519753	-0.300417	0.166523	0.00840957
0.955443	-0.00642095	0.0132055	0.042279	0.164108	-0.0884636	-0.0886804	0.0619784	0.0512374	0.0073226	-0.129235	-0.54207	-0.22493	0.120105	0.153809	0.104235	0.170646	0.33032			0.560717	0.0295133	0.0230427	0.0117779	0.00899675	-0.0828714	-0.279587	0.0825673	0.0152334	0.241939	-0.0998609	0.240572	0.120488	0.110568	0.807371	1.00341	0.0798676	0.183288	0.089072	0.0761216					0.502703	0.0340702	-0.0671224	-0.300144	0.167101	0.00968098
0.950146	-0.0121083	0.0073416	0.0238697	0.167082	-0.0857345	-0.0528167	0.0453802	0.0454	0.000554877	-0.125993	-0.53823	-0.273156	0.129554	0.138274	0.106048	0.164999	0.325452			0.517302	0.0318993	-0.0551226	0.00776393	0.000578425	-0.0899283	-0.287465	0.09387	0.124769	0.242518	-0.100585	0.244312	0.11601	0.104596	0.755422	1.01904	0.0850748	0.190344	0.0855541	0.075978					0.492499	0.0267022	-0.0680637	-0.30533	0.164811	0.00778487
0.926711	0.0138987	0.0311202	-0.0370006	0.147398	-0.0775008	-0.0558154	0.0663465	0.0656456	-0.0342605	-0.115254	-0.53273	-0.308851	0.149391	0.173239	0.110079	0.163347	0.320844			0.47183	0.0356242	-0.0252457	0.0104442	-0.0113037	-0.102272	-0.424338	0.0958178	0.0664024	0.229067	-0.109658	0.251308	0.121246	0.103375	0.726095	1.00187	0.0989051	0.20989	0.0804736	0.0748547					0.508276	0.0221085	-0.0662218	-0.307323	0.1616	0.00798507
0.910393	0.00904427	0.0176567	-0.08253	0.152285	-0.0675833	-0.00603924	0.0834466	0.0479819	-0.0288941	-0.104372	-0.52896	-0.305643	0.151703	0.193834	0.111544	0.16521	0.315082			0.487903	0.0421719	-0.013382	-0.000679745	-0.0146249	-0.100473	-0.268454	0.132328	0.0761522	0.227999	-0.114008	0.265007	0.130888	0.100841	0.71789	0.976154	0.0932168	0.225592	0.0729717	0.0777094					0.534332	0.0245374	-0.0705817	-0.309374	0.158199	0.0082431
0.908899	0.0349838	0.0258981	-0.0902685	0.158593	-0.060963	0.0228874	0.0919422	0.0592881	-0.0575356	-0.131748	-0.523141	-0.300082	0.153399	0.18075	0.10642	0.165445	0.307889			0.474046	0.0436259	-0.00140846	0.00199052	-0.0179383	-0.0929852	-0.269875	0.145104	0.0578518	0.231148	-0.10967	0.277188	0.135756	0.108203	0.725501	0.939355	0.0782291	0.225708	0.0743128	0.0793052					0.528539	0.0274602	-0.0886304	-0.303377	0.161452	0.0108614
0.879242	0.0412881	0.00945178	-0.115825	0.160022	-0.0537705	0.0358557	0.0931649	0.0388489	-0.0308039	-0.13346	-0.516753	-0.298259	0.146177	0.163462	0.0990399	0.163907	0.300465			0.473021	0.0457329	-0.0241151	0.000390642	-0.0299395	-0.0894594	-0.156167	0.150524	0.158794	0.241336	-0.118292	0.274417	0.131928	0.118323	0.723852	0.946457	0.0750229	0.239265	0.0705202	0.0805201					0.557078	0.0310038	-0.090684	-0.303297	0.160365	0.0101421
0.845621	0.0252195	0.00873918	-0.125862	0.159256	-0.048559	0.0739243	0.115889	0.0111987	-0.00881778	-0.1347	-0.507522	-0.285788	0.113107	0.148374	0.103266	0.162261	0.294287			0.443937	0.0467608	-0.106441	-0.00185732	-0.0347745	-0.0937095	-0.113894	0.114	0.118824	0.236255	-0.119459	0.273426	0.140438	0.125127	0.704491	0.922026	0.0656416	0.222102	0.0674075	0.0825253					0.518266	0.0419772	-0.0931293	-0.303778	0.156088	0.0122141
0.843685	0.0658308	0.0394918	-0.121697	0.183492	-0.0408023	0.0999341	0.121733	0.0231537	-0.00827341	-0.115776	-0.500303	-0.239543	0.108739	0.130493	0.101118	0.167407	0.288492			0.430377	0.051191	-0.104908	0.00426175	-0.037974	-0.0941161	-0.0753588	0.116262	0.133501	0.246659	-0.117451	0.26148	0.147998	0.111098	0.700945	0.921255	0.0597934	0.220411	0.0713565	0.0852022					0.464856	0.0478722	-0.0958292	-0.308406	0.153977	0.0122162
0.860613	0.0870572	0.0412821	-0.15259	0.181943	-0.0354884	0.120517	0.0989231	-0.0043872	0.0142902	-0.121742	-0.492883	-0.227386	0.143356	0.123163	0.0946168	0.162496	0.280986			0.378021	0.0539341	-0.144306	0.00816084	-0.0377856	-0.100045	-0.0980635	0.147277	0.0388058	0.225587	-0.119689	0.259829	0.141191	0.102633	0.673612	0.912998	0.060568	0.219526	0.0745788	0.0867316					0.47268	0.0589202	-0.100129	-0.304207	0.149704	0.0109275
0.857915	0.121919	0.0522177	-0.17564	0.182676	-0.0327641	0.149908	0.117025	0.0150479	-0.00801927	-0.124329	-0.483647	-0.22103	0.123044	0.111187	0.104766	0.168109	0.275539			0.381027	0.0473896	-0.069862	0.00959562	-0.0353505	-0.0985688	-0.0811059	0.134851	-0.0473739	0.215053	-0.121235	0.254853	0.140812	0.108019	0.684366	0.947042	0.0479087	0.220354	0.0786583	0.0880681					0.470549	0.0637398	-0.103122	-0.301897	0.148428	0.0123906
0.826859	0.126465	0.0401066	-0.171393	0.207175	-0.0267179	0.123135	0.0826478	-0.000137313	-0.00345304	-0.1228	-0.477128	-0.185361	0.0470649	0.0642882	0.120478	0.167095	0.269155			0.382705	0.0513719	-0.0705756	0.00127366	-0.0300497	-0.0924877	0.0393494	0.161029	-0.0956758	0.217631	-0.123171	0.256617	0.138642	0.103075	0.685344	0.960635	0.0419418	0.22061	0.0735082	0.0897539					0.479134	0.0726578	-0.099756	-0.297759	0.149268	0.0134377
0.795492	0.162411	0.059372	-0.162348	0.21007	-0.018436	0.117639	0.0572055	0.011865	-0.00578473	-0.129287	-0.472174	-0.175092	-0.0171251	0.0547506	0.137306	0.164036	0.261608			0.355984	0.0466364	-0.0731846	0.000741669	-0.0353668	-0.0973991	0.0391195	0.169891	-0.094223	0.21535	-0.121287	0.248048	0.126245	0.0866112	0.723335	0.932653	0.0355315	0.219764	0.0782491	0.089993					0.453727	0.0777798	-0.111405	-0.296803	0.148912	0.0139445
0.798715	0.119422	0.0233329	-0.184216	0.209148	-0.0183514	0.102036	0.0496823	0.0183402	-0.00415781	-0.105601	-0.470557	-0.173134	-0.0236551	0.0512182	0.146011	0.171024	0.254098			0.356149	0.0490118	-0.0562801	-0.00724234	-0.0236757	-0.108079	0.0882886	0.222228	-0.0440892	0.215793	-0.118502	0.234526	0.114399	0.0820874	0.732564	0.93042	0.0515811	0.217174	0.0847721	0.0900503					0.463622	0.0877798	-0.107318	-0.296678	0.142094	0.0104465
0.791011	0.132418	0.0514957	-0.199705	0.207282	-0.0111817	0.064041	0.0400279	0.033597	-0.0319634	-0.11848	-0.469606	-0.16771	-0.0752603	0.0507893	0.142372	0.180142	0.245842			0.353096	0.0473685	-0.0219928	-0.0102126	-0.0197323	-0.10934	0.100738	0.177517	-0.0676226	0.201218	-0.116094	0.227285	0.111937	0.0989314	0.763066	0.956094	0.05047	0.214515	0.0823226	0.0879874					0.472445	0.0887222	-0.102378	-0.297372	0.134354	0.0127798
0.814321	0.179809	0.0918697	-0.210837	0.202497	-0.00556271	0.0413417	0.0189636	0.0313817	-0.0309782	-0.120923	-0.47039	-0.163578	-0.0304542	0.0443852	0.138916	0.208726	0.238711			0.347744	0.037785	0.0828967	-0.00468168	-0.0102249	-0.104491	-0.0298794	0.165708	-0.000986852	0.211249	-0.115782	0.233473	0.123179	0.101797	0.765856	0.948398	0.0452674	0.231909	0.0756582	0.0887584					0.513035	0.0816773	-0.107075	-0.297309	0.133499	0.0125787
0.810943	0.1408	0.0488561	-0.214301	0.194184	-0.00101847	0.0313849	0.0113626	0.0193584	-0.0318848	-0.129981	-0.469738	-0.203433	-0.0618515	0.0422343	0.15085	0.202472	0.23339			0.338549	0.0349925	0.115068	-0.00266311	-0.0168152	-0.103888	-0.0182816	0.164839	0.0798371	0.20773	-0.110246	0.244182	0.119889	0.107048	0.792741	0.927554	0.0531968	0.228667	0.0714796	0.0877478					0.531615	0.0809217	-0.109879	-0.295541	0.131367	0.0135963
0.784722	0.168858	0.0532094	-0.218462	0.183028	0.00356527	-0.00756027	0.00715305	0.066255	-0.0531572	-0.131211	-0.470959	-0.205973	-0.0512791	0.0390493	0.157154	0.198454	0.229825			0.303068	0.0343409	0.0471579	-0.00921786	-0.018142	-0.101693	0.0225238	0.154384	0.152168	0.211364	-0.110069	0.245501	0.114391	0.118936	0.804481	0.937396	0.0326268	0.229232	0.0660016	0.0875226					0.547094	0.0857379	-0.109999	-0.303035	0.130041	0.0118962
0.791341	0.166709	0.0327183	-0.215106	0.170371	0.010909	-0.0318739	-0.0219251	0.0479384	-0.0339196	-0.140315	-0.474411	-0.207016	-0.0246105	0.0452646	0.160734	0.197048	0.225246			0.360546	0.0465386	0.0521755	-0.0169424	-0.0202558	-0.0997304	-0.106484	0.142404	0.157938	0.223153	-0.109103	0.250665	0.115694	0.106032	0.828068	0.914672	0.0355156	0.230894	0.0633455	0.0865987					0.549512	0.0962543	-0.111544	-0.307171	0.129288	0.0107988
0.798059	0.124742	0.0176087	-0.209341	0.156424	0.00988277	-0.0428442	-0.0208894	0.0688411	-0.0358246	-0.153141	-0.475626	-0.234015	0.0042729	0.0480681	0.14095	0.193836	0.220871			0.354188	0.0495807	0.0470115	-0.0115363	-0.0285061	-0.0960979	-0.217582	0.0983784	0.214305	0.214889	-0.114122	0.248613	0.10783	0.0835121	0.81482	0.91857	0.0419758	0.244727	0.0664078	0.0849809					0.528828	0.0946477	-0.120094	-0.312638	0.134339	0.00998661
0.773812	0.108881	0.00788922	-0.206763	0.144848	0.00775743	-0.0793882	-0.0225307	0.0517392	-0.0155659	-0.160244	-0.474883	-0.233471	0.0819469	0.0311337	0.141047	0.197344	0.221023			0.447597	0.0589501	0.0716116	-0.0140727	-0.0453393	-0.0936642	-0.214648	0.127927	0.087073	0.210924	-0.115925	0.251041	0.10982	0.119806	0.832859	0.95011	0.0493757	0.269125	0.0678567	0.0809958					0.575963	0.0947038	-0.107829	-0.313199	0.131117	0.024069
0.805279	0.124625	0.0198612	-0.207478	0.136377	0.0161858	-0.0563856	-0.0161236	0.0493527	-0.0159246	-0.170885	-0.473365	-0.232506	0.0859301	0.0347295	0.175623	0.190119	0.227502			0.466027	0.0584346	0.0756267	-0.018066	-0.0627156	-0.094928	-0.382041	0.109595	0.142308	0.211234	-0.110165	0.260833	0.109951	0.145256	0.81978	0.950868	0.0444552	0.300333	0.0531091	0.0830103					0.583845	0.0888669	-0.107938	-0.314912	0.130513	0.025143
0.848178	0.10028	0.00410386	-0.211661	0.129615	0.0157669	-0.01503	-0.024851	0.0299563	0.0103206	-0.160411	-0.471857	-0.227193	0.0974699	0.0128202	0.192793	0.204036	0.233837			0.502973	0.0610974	-0.0024061	-0.0196349	-0.0637885	-0.0954558	-0.351575	0.115611	0.0750715	0.203106	-0.104536	0.275305	0.112696	0.0945207	0.842359	0.926797	0.0276955	0.318495	0.0572321	0.086815					0.554451	0.101136	-0.119784	-0.317685	0.133459	0.0243891
0.890196	0.0690787	-0.0266406	-0.214035	0.129667	0.0166057	-0.0579835	-0.0186492	0.0425898	0.00659706	-0.156138	-0.473555	-0.230261	0.0916507	0.0396825	0.212899	0.173359	0.24303			0.523179	0.0670686	-0.0879131	-0.0263433	-0.0732165	-0.0950639	-0.187724	0.0919685	0.0779238	0.198382	-0.106434	0.276396	0.0986789	0.0864669	0.837929	0.927397	0.0219277	0.376808	0.0629822	0.0857667					0.526562	0.112039	-0.125295	-0.315852	0.131498	0.022818
0.933875	0.0931116	-0.00328847	-0.219095	0.13169	0.0226982	-0.0611703	-0.00555894	0.0607836	0.00996441	-0.153233	-0.472776	-0.228303	0.142824	0.0652459	0.204928	0.17255	0.249651			0.547548	0.069012	-0.0609977	-0.0374202	-0.0749495	-0.0960294	-0.32173	0.0812885	0.0885684	0.1969	-0.11397	0.274586	0.0977606	0.119121	0.809856	0.900545	0.029162	0.451644	0.070357	0.0869997					0.531582	0.122616	-0.128201	-0.318706	0.129542	0.0227984
0.909203	0.0593015	-0.0146526	-0.222167	0.140014	0.0270268	-0.0391681	0.00795666	0.0457432	0.00680979	-0.15654	-0.470402	-0.222759	0.112409	0.0476486	0.207796	0.200587	0.256581			0.58213	0.0724778	-0.054934	-0.0495245	-0.0739736	-0.0878217	-0.346952	0.0790673	0.088277	0.208086	-0.112466	0.265729	0.0962546	0.0996928	0.828002	0.860276	0.049039	0.539436	0.0784696	0.0868586					0.523263	0.129585	-0.134166	-0.315767	0.127529	0.0244656
0.941228	0.0258216	-0.0225859	-0.233205	0.146237	0.0273284	-0.0313279	0.00996435	0.00859725	0.0114085	-0.150123	-0.468467	-0.224067	0.0701125	0.0296623	0.195232	0.19256	0.266421			0.543843	0.0655883	-0.0551781	-0.0480434	-0.0689366	-0.0830242	-0.195634	0.0814779	0.0966646	0.212578	-0.110794	0.259748	0.103619	0.130724	0.868117	0.856649	0.0608958	0.634953	0.0810897	0.0865246					0.569923	0.134151	-0.139429	-0.31086	0.129056	0.0250878
0.972938	0.0590705	-0.0332764	-0.244796	0.152045	0.0342824	-0.0270451	0.0515619	-0.00258078	0.00909776	-0.14707	-0.464625	-0.19223	0.117714	0.0515986	0.199491	0.213388	0.277307			0.520803	0.0606654	-0.106331	-0.0508028	-0.0729944	-0.0731481	-0.200854	0.12254	0.0406883	0.210535	-0.0988459	0.265136	0.106293	0.140551	0.866982	0.853577	0.0703782	0.727764	0.0801613	0.0874297					0.601505	0.149585	-0.137009	-0.310011	0.119747	0.0256063
1.02706	0.0501418	-0.0495025	-0.254686	0.155598	0.0367023	-0.0167208	0.0417707	0.00260784	-0.0165828	-0.146903	-0.461715	-0.19442	0.0979718	0.0539797	0.187361	0.209037	0.288753			0.472478	0.054685	-0.176405	-0.0511943	-0.0546747	-0.0712119	-0.192152	0.120225	0.226405	0.199896	-0.0896251	0.261579	0.106637	0.118613	0.813209	0.79301	0.0791767	0.818432	0.0790548	0.0900463					0.568777	0.166734	-0.148166	-0.310429	0.120214	0.0120136
1.02742	0.0601681	-0.0594688	-0.252995	0.160707	0.0365145	-0.056968	0.0325785	-0.0250919	0.00529307	-0.136026	-0.459481	-0.160065	0.048314	0.0333218	0.147811	0.208857	0.293771			0.462396	0.065058	-0.258753	-0.0370825	-0.0421792	-0.0695254	-0.191978	0.0400008	0.104214	0.191577	-0.0956964	0.26052	0.0954067	0.122349	0.830985	0.811656	0.080434	0.917445	0.0857013	0.0858772					0.569247	0.187799	-0.152455	-0.313802	0.118255	0.0120534
1.02356	0.104339	-0.0491124	-0.251584	0.1658	0.0509437	-0.0951513	0.0384802	-0.0224631	0.00292111	-0.150783	-0.458485	-0.164492	0.112471	0.0400631	0.152209	0.191101	0.298473			0.429665	0.0604682	-0.17944	-0.0428092	-0.0392923	-0.0677602	-0.342219	0.0459159	0.17888	0.20358	-0.10146	0.255418	0.0937726	0.164529	0.816241	0.770729	0.105508	1.03214	0.0831827	0.0839095					0.597934	0.191342	-0.15639	-0.312479	0.119234	0.011545
1.0275	0.111388	-0.0449576	-0.24422	0.168129	0.0569046	-0.0832998	0.0217407	0.00182721	-0.0167042	-0.148733	-0.454973	-0.164242	0.12122	-0.00103455	0.140408	0.192259	0.30232			0.382553	0.0690721	-0.109355	-0.0358242	-0.0320474	-0.0675865	-0.391605	0.0643008	0.238888	0.196639	-0.100079	0.238383	0.098537	0.166163	0.867482	0.738588	0.115241	1.11535	0.0875264	0.0819171					0.584525	0.204447	-0.16229	-0.314201	0.118313	0.0142051
1.02394	0.0894201	-0.0673587	-0.223596	0.172536	0.0599363	-0.0880287	0.0037859	-0.0209672	-0.0147844	-0.146694	-0.457322	-0.160667	0.0561047	-0.0381582	0.14953	0.196383	0.308559			0.353934	0.063966	-0.125935	-0.0341649	-0.0291323	-0.0577773	-0.262206	0.099047	0.140344	0.191824	-0.0905441	0.23485	0.108723	0.141662	0.902204	0.71798	0.108978	1.13512	0.0780928	0.0821224					0.613349	0.205167	-0.163745	-0.31279	0.118553	0.0138391
1.08421	0.0781217	-0.0876478	-0.199459	0.170432	0.0560511	-0.0959917	-0.0126741	-0.0471261	0.0116624	-0.146462	-0.474228	-0.161299	0.0310246	-0.0347773	0.176364	0.185217	0.314114			0.348002	0.0619794	-0.0686765	-0.0245514	-0.0336503	-0.0630198	-0.307265	0.0783432	0.107293	0.188554	-0.0817969	0.243821	0.13145	0.136437	0.888475	0.704305	0.0900874	1.19213	0.0729913	0.0803664					0.638339	0.204074	-0.155775	-0.312875	0.11812	0.012845
1.05353	0.105636	-0.0540379	-0.168158	0.169444	0.0565809	-0.106135	-0.0163541	-0.00179764	-0.0116021	-0.153833	-0.489944	-0.160268	0.081788	0.00130701	0.178254	0.184409	0.316376			0.330978	0.0622977	-0.132459	-0.021703	-0.04704	-0.0650748	-0.34486	0.0662599	0.129015	0.175557	-0.0739369	0.253136	0.120204	0.119733	0.842549	0.665934	0.0849653	1.18886	0.0723768	0.0820967					0.605721	0.209728	-0.16017	-0.317302	0.11651	0.0119299
1.02	0.0948834	-0.0547259	-0.176548	0.168406	0.0594335	-0.093223	-0.058686	-0.00806515	-0.00288763	-0.156204	-0.508276	-0.193173	0.0704972	-0.0344982	0.187959	0.169038	0.318103			0.360261	0.0681383	-0.124462	-0.0219219	-0.052482	-0.073959	-0.352179	0.0715055	0.16375	0.17575	-0.071271	0.241616	0.126427	0.147228	0.869215	0.618932	0.0734965	1.22516	0.0811647	0.0804783					0.555997	0.208567	-0.162295	-0.317205	0.115044	0.0127441
1.02841	0.0911482	-0.0546543	-0.182886	0.168726	0.0666723	-0.0564926	-0.0502291	0.00280255	0.000957552	-0.157795	-0.527081	-0.187094	0.0859376	-0.0338513	0.178007	0.166984	0.316645			0.302272	0.0665948	-0.120676	-0.0236487	-0.0596541	-0.0720994	-0.399663	0.0569413	0.0890861	0.180689	-0.0772417	0.232208	0.128817	0.137397	0.906546	0.594131	0.0658455	1.25101	0.0769294	0.0783692					0.544	0.19955	-0.16715	-0.312334	0.114876	0.01298
1.03047	0.0877531	-0.0554049	-0.194197	0.166673	0.0410104	-0.0623961	-0.0526578	0.0217604	-0.0168115	-0.166705	-0.543257	-0.22116	0.141638	0.00284275	0.201558	0.175701	0.315324			0.294508	0.052218	-0.113397	-0.0386738	-0.0655154	-0.0628492	-0.319177	0.106655	0.105259	0.196774	-0.0718416	0.219701	0.136948	0.125702	0.893366	0.542774	0.0644351	1.26524	0.0816451	0.0803107					0.545482	0.189701	-0.168556	-0.311874	0.116644	0.0126556
1.03338	0.0674917	-0.0752249	-0.202687	0.161646	0.00723216	-0.0292838	-0.0437109	0.0317087	-0.0259864	-0.146198	-0.557293	-0.217799	0.145981	0.0411458	0.181365	0.169723	0.314521			0.273677	0.0553546	-0.0821778	-0.0386401	-0.0685864	-0.0612978	-0.20522	0.0959351	0.126245	0.203336	-0.0666019	0.219486	0.133191	0.112105	0.897743	0.547948	0.0541887	1.27811	0.0838136	0.0804622					0.49653	0.186642	-0.172275	-0.307329	0.115536	0.0114526
1.03208	0.0659039	-0.0742561	-0.212805	0.159503	-0.01659	-0.00636058	-0.0456924	0.021292	-0.0269847	-0.154034	-0.567994	-0.217677	0.142415	0.046345	0.176441	0.176288	0.311293			0.308403	0.0517149	-0.140632	-0.0502272	-0.0878324	-0.0624191	-0.190237	0.0925019	0.129464	0.204428	-0.0654457	0.233243	0.143793	0.141557	0.815255	0.540508	0.0505736	1.27466	0.0784654	0.0814317					0.488299	0.171957	-0.163793	-0.305609	0.114484	0.0125792
0.97353	0.131158	-0.033117	-0.217575	0.156484	-0.045436	-0.00144486	-0.0151834	0.026961	-0.0203209	-0.156268	-0.572305	-0.213885	0.197965	0.0780093	0.169076	0.193281	0.308471			0.315483	0.0579757	-0.225394	-0.0444202	-0.0971069	-0.075248	-0.192499	0.0481685	0.131678	0.208858	-0.072915	0.236245	0.130562	0.144565	0.786607	0.563166	0.036618	1.31638	0.084619	0.0790134					0.445159	0.168231	-0.172721	-0.303451	0.108755	0.0124869
0.946359	0.130638	-0.0316119	-0.211742	0.157254	-0.0581173	-0.0253627	-0.0200771	0.041914	-0.0428371	-0.148435	-0.561099	-0.215498	0.244896	0.114579	0.147671	0.186004	0.303616			0.320273	0.0593517	-0.200555	-0.0471806	-0.094404	-0.067926	-0.154155	0.0272429	0.200511	0.205695	-0.072608	0.229657	0.119727	0.168824	0.804386	0.568335	0.0431016	1.30676	0.0881473	0.0777438					0.391054	0.164327	-0.177782	-0.299393	0.108747	0.0133401
0.975764	0.131109	-0.0542416	-0.2104	0.159795	-0.0767181	-0.0220366	-0.0217727	0.036572	-0.0401753	-0.129371	-0.549181	-0.219243	0.263493	0.0805301	0.162949	0.224149	0.297282			0.305231	0.0654146	-0.116199	-0.0484663	-0.0918993	-0.069002	-0.156368	0.104848	0.23993	0.21136	-0.0817088	0.21676	0.123506	0.190116	0.764706	0.577884	0.0433167	1.34498	0.0795602	0.0735468					0.374086	0.158272	-0.176589	-0.297512	0.105641	0.0127468
0.99838	0.181571	-0.0253811	-0.201071	0.159377	-0.0994246	-0.0457274	-0.0132169	0.039086	-0.0407737	-0.12898	-0.534443	-0.217533	0.340339	0.116319	0.160492	0.22651	0.290839			0.258218	0.0559708	-0.118549	-0.0537992	-0.0855709	-0.0699021	-0.0592328	0.0412414	0.170685	0.215191	-0.082497	0.214915	0.121134	0.185681	0.740996	0.56969	0.0261173	1.33174	0.0705422	0.074212					0.363156	0.150025	-0.187362	-0.297656	0.103511	0.0110044
0.926709	0.21576	5.50619e-05	-0.18494	0.15973	-0.125873	-0.110074	-0.018024	0.0240374	-0.0505593	-0.116957	-0.519548	-0.223947	0.314399	0.116908	0.166838	0.23427	0.285501			0.279795	0.0468767	-0.0928563	-0.0536257	-0.0874089	-0.0744754	-0.157911	0.0275614	0.0799382	0.214376	-0.0759763	0.21111	0.12536	0.214117	0.681714	0.623163	0.0125747	1.32229	0.0662075	0.0724641					0.364077	0.142217	-0.18129	-0.299711	0.101478	0.0121611
0.853278	0.233284	0.0230263	-0.15725	0.152321	-0.117161	-0.0946933	-0.00970448	0.00850796	-0.0309049	-0.127165	-0.501738	-0.216911	0.313327	0.121331	0.142126	0.233411	0.281213			0.28186	0.0491263	-0.0884228	-0.0523756	-0.0858861	-0.0816497	-0.239968	0.109783	0.247091	0.19286	-0.0841028	0.215879	0.124925	0.183974	0.700134	0.621627	0.0232961	1.30723	0.0669653	0.0701434					0.367328	0.135356	-0.172779	-0.298768	0.0999454	0.014259
0.776314	0.247385	0.0377783	-0.12108	0.170355	-0.104645	-0.11662	-0.0153105	0.0237209	-0.041012	-0.138519	-0.486555	-0.21789	0.314855	0.119528	0.150876	0.237837	0.275508			0.297457	0.0497022	-0.17631	-0.0568604	-0.0899129	-0.0756392	-0.355433	0.147275	0.288704	0.177764	-0.0901467	0.205724	0.13492	0.223922	0.692873	0.638001	0.0371716	1.28984	0.0652374	0.0652744					0.373976	0.130163	-0.16602	-0.29918	0.0969356	0.0142061
0.730018	0.247313	0.0502029	-0.0910326	0.184172	-0.0977403	-0.102482	-0.00836344	0.0152428	-0.0374635	-0.136731	-0.475336	-0.211264	0.275135	0.149966	0.156965	0.265666	0.270302			0.27026	0.0503377	-0.154978	-0.0530403	-0.0920138	-0.0670727	-0.498872	0.130189	0.162626	0.182329	-0.0917987	0.198353	0.117969	0.213587	0.733049	0.665596	0.0373045	1.27589	0.0630008	0.0625445					0.362474	0.121829	-0.157336	-0.297945	0.0942118	0.00930147
0.821535	0.219438	0.0325897	-0.0741344	0.19012	-0.0858618	-0.0926076	-0.0294862	-0.0164444	-0.0220386	-0.13937	-0.471477	-0.212561	0.237315	0.151292	0.154365	0.249484	0.26299			0.261042	0.0484266	-0.140522	-0.0641664	-0.0922038	-0.0508414	-0.526781	0.154044	0.133173	0.187028	-0.0864746	0.187011	0.1193	0.207766	0.75149	0.642421	0.0521108	1.25491	0.0505342	0.0612917					0.379201	0.116054	-0.139175	-0.294898	0.0970776	0.0077147
0.876296	0.213746	0.0403414	-0.0765928	0.200473	-0.0812732	-0.0455962	-0.0297461	-0.00661174	-0.0220685	-0.141936	-0.472892	-0.2062	0.193185	0.15139	0.145841	0.247429	0.259194			0.247114	0.0417497	-0.248361	-0.0708577	-0.0895153	-0.0517766	-0.544278	0.16932	-0.0141904	0.196147	-0.0867122	0.174984	0.130418	0.198764	0.746585	0.646173	0.0572403	1.22854	0.0515396	0.0602725					0.4104	0.109726	-0.138186	-0.295635	0.0970992	0.00828776
0.873646	0.209541	0.0501462	-0.0720151	0.195586	-0.067766	-0.0828173	-0.0175668	0.0027136	-0.0208513	-0.150159	-0.478248	-0.19838	0.176662	0.18562	0.139953	0.217081	0.259316			0.254905	0.0368382	-0.307639	-0.0799796	-0.0924432	-0.0527665	-0.668507	0.103344	-0.0183152	0.192994	-0.0851648	0.163022	0.135831	0.164483	0.786073	0.641334	0.0657896	1.16651	0.0564792	0.0668984					0.384792	0.109521	-0.12243	-0.293526	0.0969548	0.00852975
0.844528	0.171685	0.0389058	-0.0433471	0.195646	-0.0519742	-0.0322697	-0.0180151	-0.0114925	-0.0238933	-0.144174	-0.489672	-0.194708	0.0239052	0.184028	0.13514	0.21781	0.258169			0.280372	0.0410088	-0.297041	-0.0785363	-0.0899514	-0.0449549	-0.772115	0.114494	0.100334	0.197736	-0.0927902	0.155754	0.154539	0.187259	0.796354	0.68347	0.0811053	1.14375	0.0562013	0.0706892					0.372939	0.10565	-0.0999602	-0.290455	0.0990109	0.010644
0.912183	0.172972	0.029803	-0.0107218	0.190397	-0.0374283	0.0163245	-0.00152751	-0.0186459	-0.0101705	-0.155025	-0.502866	-0.187603	-0.006956	0.216205	0.14784	0.212869	0.25513			0.284025	0.0474801	-0.302409	-0.0743733	-0.0757501	-0.0393305	-0.77676	0.168172	0.0908619	0.193346	-0.100037	0.155439	0.145546	0.16355	0.835671	0.687789	0.0754398	1.11789	0.0607063	0.0713488					0.358895	0.10379	-0.0795835	-0.286317	0.097864	0.0086316
0.980116	0.19271	0.0308764	0.00650392	0.194168	-0.0209484	-0.0209213	0.00189267	0.0148009	-0.0326383	-0.154052	-0.519932	-0.183907	-0.0811088	0.210757	0.185769	0.213028	0.252977			0.272271	0.0488174	-0.309305	-0.0704068	-0.075464	-0.0353887	-0.654307	0.0674698	-0.0662717	0.198787	-0.0952778	0.139096	0.145107	0.167255	0.84876	0.683917	0.0610668	1.09812	0.047451	0.0695385					0.354268	0.0997732	-0.0719068	-0.285551	0.0953219	0.00561113
1.02534	0.191304	0.0275521	0.0165679	0.174832	-0.00574532	-0.00353258	-0.0132128	0.0109437	-0.0303771	-0.147096	-0.53678	-0.182673	-0.0964439	0.204881	0.207428	0.210652	0.250918			0.275134	0.0452731	-0.284445	-0.0707447	-0.0687824	-0.0402602	-0.527296	0.0285391	-0.186638	0.21016	-0.0883095	0.122723	0.138746	0.122381	0.811028	0.66146	0.0413195	1.07774	0.0434647	0.0772797					0.330095	0.0929938	-0.0582774	-0.28901	0.0952036	0.00565784
1.08886	0.227944	0.0238392	0.0272772	0.161641	0.00674532	-0.00462233	-0.0269989	0.0231326	-0.0399347	-0.142098	-0.546514	-0.182954	-0.0868525	0.201421	0.201316	0.189434	0.248806			0.261097	0.0339388	-0.288852	-0.0727576	-0.0538517	-0.0448659	-0.395511	0.117768	-0.174916	0.20152	-0.0758856	0.102016	0.142771	0.103315	0.856351	0.690056	0.0517534	1.06056	0.0437416	0.0860769					0.324593	0.0884875	-0.0597159	-0.291345	0.0939547	0.00653155
1.06171	0.231049	0.0202765	0.0237076	0.154145	0.0188073	-0.00728501	-0.0329377	0.0594457	-0.0651791	-0.137216	-0.552147	-0.184998	-0.125391	0.200184	0.205369	0.195339	0.247496			0.29167	0.0324229	-0.283872	-0.0725363	-0.0549312	-0.0440407	-0.362069	0.0820153	-0.0668862	0.203612	-0.0726206	0.0970735	0.148873	0.105299	0.86361	0.736995	0.0406863	1.05005	0.0429446	0.0926015					0.299659	0.0824154	-0.0502624	-0.291893	0.0947152	0.0056196
1.01142	0.279057	0.0197595	0.0337973	0.143377	0.0282183	-0.020298	-0.0283045	0.0480089	-0.0705454	-0.1348	-0.555262	-0.195154	-0.0698547	0.197668	0.211917	0.213122	0.245097			0.29836	0.031508	-0.230108	-0.0599768	-0.0653635	-0.0371159	-0.351798	0.12667	0.110428	0.200725	-0.0778339	0.0924039	0.134988	0.111415	0.887808	0.703228	0.0316187	1.04114	0.0371155	0.10025					0.250877	0.0798829	-0.0305995	-0.292132	0.0935341	0.00491121
1.01448	0.330165	0.0182208	0.0234841	0.148959	0.0327496	0.0269305	-0.0225062	0.0308073	-0.0746987	-0.135992	-0.553221	-0.195802	-0.141998	0.197135	0.203797	0.223113	0.24095			0.309991	0.0221349	-0.179443	-0.0591279	-0.0690341	-0.0233247	-0.240213	0.204538	-0.0193418	0.210486	-0.0762935	0.0955526	0.137605	0.110385	0.893623	0.719979	0.0146499	1.0724	0.0336993	0.0947232					0.254288	0.0649278	-0.0217593	-0.291179	0.0962236	0.00644439
0.990716	0.349441	0.00940113	0.0291555	0.150228	0.0340446	0.00978513	-0.0305944	0.0152914	-0.048408	-0.130105	-0.55034	-0.197929	-0.137849	0.195741	0.207816	0.22294	0.236295			0.281554	0.018412	-0.170204	-0.0657857	-0.0710531	-0.0204291	-0.116025	0.232879	-0.140846	0.214667	-0.0738718	0.0883154	0.127284	0.0611231	0.861258	0.751179	0.018095	1.05708	0.0274371	0.0885633					0.275206	0.0630316	-0.0170087	-0.289417	0.0980306	0.0042178
1.00189	0.366457	-0.000901255	0.0159057	0.153392	0.0350669	0.014733	-0.0522351	-0.000289747	-0.0251669	-0.115975	-0.545021	-0.204461	-0.0523086	0.196985	0.192159	0.233258	0.234916			0.270662	0.0185229	-0.164192	-0.0713745	-0.0748185	-0.01237	-0.110368	0.195983	-0.143224	0.225912	-0.0731089	0.0747264	0.132222	0.0867074	0.870544	0.752624	0.0395254	1.04669	0.0257123	0.0867184					0.26975	0.0668278	-0.0187556	-0.291561	0.0989037	0.00490243
1.00392	0.412115	-0.0107318	0.00253075	0.151637	0.0354356	0.0177629	-0.0727527	-0.00590157	-0.027801	-0.098134	-0.533686	-0.209539	0.0124032	0.166655	0.182087	0.23611	0.232065			0.238302	0.0113469	-0.135671	-0.0748419	-0.0725753	-0.00781633	-0.0668577	0.21463	0.0135533	0.233797	-0.0744878	0.0793586	0.137233	0.100473	0.882488	0.773494	0.0524088	1.02279	0.0270406	0.0862525					0.226719	0.0748568	-0.0167671	-0.289781	0.10217	0.00682052
0.996693	0.465099	-0.013618	-0.00577505	0.152809	0.0279428	-0.0248669	-0.0289075	-0.0313073	-0.00681553	-0.101327	-0.508312	-0.207716	-0.0493281	0.173093	0.161549	0.248085	0.23004			0.242113	0.00607672	-0.138008	-0.0783955	-0.0776493	0.0068897	-0.187591	0.254332	0.124603	0.227894	-0.0791748	0.0967515	0.128174	0.0900803	0.999669	0.805359	0.0742675	1.01223	0.0314666	0.077625					0.234796	0.0849629	-0.00904942	-0.286492	0.101467	0.009095
0.913721	0.469758	-0.0179822	-0.0182218	0.148918	-0.00207623	-0.0589151	-0.000105811	-0.0341227	-0.000526371	-0.0959223	-0.503581	-0.206208	0.0208382	0.177934	0.167809	0.249996	0.230174			0.240679	0.0173268	-0.120629	-0.0752378	-0.0894174	0.0183756	-0.190788	0.203917	0.282567	0.240228	-0.0891093	0.111675	0.13124	0.0897928	0.943275	0.781034	0.0759392	0.99095	0.0319603	0.0693646					0.234866	0.107748	-0.00394876	-0.280609	0.101587	0.0120305
0.841062	0.500589	-0.0182609	-0.0212413	0.143959	-0.0345074	-0.0668469	-0.00264092	-0.0442405	-0.000624578	-0.09883	-0.498938	-0.204473	0.0871385	0.166074	0.157057	0.247316	0.229188			0.200606	0.0247658	-0.117809	-0.072767	-0.0895451	0.0193252	-0.207717	0.26232	0.198165	0.223578	-0.0964749	0.113294	0.126252	0.0950303	0.920835	0.728012	0.0722285	0.974361	0.0274111	0.0632135					0.229852	0.133135	-0.00377785	-0.275245	0.0999085	0.0130491
[truncated: 2,978 more rows]
[truncated: 30 more columns]

## Sheet: Fig. 6-F_Rmax wt,unc-13,unc-31
wildtype																				unc-13								unc-31
[truncated: 4,426 more rows]
