# Supplementary material for: Direct glia-to-neuron transdifferentiation gives rise to a pair of male-specific neurons that ensure nimble male mating
Source: eLife. 2020 Nov 3;9:e48361. doi: 10.7554/eLife.48361 (PMC7609048; doi:10.7554/eLife.48361)
Supplement: Figure 7—figure supplement 2—source data 1. [file elife-48361-fig7-figsupp2-data1.xlsx]

## Sheet: Fig. 7 S2A-B_Ectopic proding MM
Movie number	Treatment	Total number of Molina manouvre	Molina manouvre with ectopic prodding
27 (exp 1)	mock 1	0	0							Treatment	Total number of MM	MM with ectopic prodding		Treatment	Total number of Discontinuous MM	Discontinuous MM with ectopic prodding
28 (exp 1)	mock 2	1	0							MOCK	47	2		MOCK	10	2
34 (exp 1)	mock3	2	0							ABLATED	51	10		ABLATED	32	10
36 (exp 1)	mock4	3	0
41 (exp 1)	mock5	2	0
44 (exp 1)	mock 6	0	0							Treatment	% MM with ectopic prodding			Treatment	% Discontinuous MM with ectopic prodding
45 (exp 1)	mock 7	0	0							MOCK	4.25532			MOCK	20
1 (exp 2)	MOCK 8	0	0							ABLATED	19.6078			ABLATED	31.25
4 (exp 2)	MOCK 9	0	0
8 (exp 2)	MOCK 10	7	1
9 (exp 2)	MOCK 10	19	0
15 (exp 2)	MOCK 10	2	0
16 (exp 2)	MOCK 11	0	0
18 (exp 2)	MOCK 12	4	0						c2 test of number of Molina manoeuvres with or without ectopic prodding performed by mock ablated vs PHD ablated males.					c2 test of number of discontinious manoeuvres with or without ectopic prodding performed by mock ablated vs. PHD ablated animals
19 (exp 2)	MOCK 12	1	0						Chi-square					Chi-square
22 (exp 2)	MOCK 13	4	1						Chi-square, df	5,365, 1				Chi-square, df	0,4725, 1
23 (exp 2)	MOCK 13	0	0						z	2.316				z	0.6874
27 (exp 2)	MOCK 14	0	0						P value	0.0205				P value	0.4918
28 (exp 2)	MOCK 15	0	0						P value summary	*				P value summary	ns
32 (exp 2)	MOCK 16	2	0						One- or two-tailed	Two-tailed				One- or two-tailed	Two-tailed
33 (exp 2)	MOCK 16	0	0						Statistically significant? (alpha<0.05)	Yes				Statistically significant? (alpha<0.05)	No
34 (exp 2)	MOCK 17	0	0
2 (exp 3)	MOCK 18	0	0						Data analyzed	MM WITH ECTOPIC PRODING	MM WITHOUT ECTOPIC PRODING	Total		Data analyzed	MM WITH ECTOPIC PRODING	MM WITHOUT ECTOPIC PRODING	Total
4 (exp 3)	MOCK 19	0	0						MOCK	2	45	47		MOCK	2	8	10
6 (exp 3)	MOCK 20	0	0						ABLATED	10	41	51		ABLATED	10	22	32
7 (exp 3)	MOCK 21	0	0						Total	12	86	98		Total	12	30	42
26 (exp 1)	ablated 1	4	0
29 (exp 1)	ablated 2	0	0
31 (exp 1)	ablated 3	0	0
37 (exp 1)	ablated 4	0	0
39 (exp 1)	ablated 5	5	0
40 (exp 1)	ablated 6	0	0
42 (exp 1)	ablated 7	0	0
43 (exp 1)	ablated 7	0	0
46 (exp 1)	ablated 8	0	0
48 (exp 1)	ablated 9	0	0
50 (exp 1)	ablated 9	0	0
2 (exp 2)	ABLATED 10	1	0
3 (exp 2)	ABLATED 11	0	0
6 (exp 2)	ABLATED 12	14	8
10 (exp 2)	ABLATED 13	0	0
11 (exp 2)	ABLATED 13	1	0
12 (exp 2)	ABLATED 13	2	1
13 (exp 2)	ABLATED 12	4	1
20 (exp 2)	ABLATED 14	0	0
21 (exp 2)	ABLATED 14	0	0
24 (exp 2)	ABLATED 15	0	0
25 (exp 2)	ABLATED 16	0	0
29 (exp 2)	ABLATED 17	0	0
31 (exp 2)	ABLATED 17	0	0
9 (exp 3)	ABLATED 18	0	0
10 (exp 3)	ABLATED 19	0	0
11 (exp 3)	ABLATED 20	0	0
12 (exp 3)	ABLATED 21	2	0
16 (exp 3)	ABLATED 22	18	0

## Sheet: Fig. 7 S2C-D_Ectopic prod scans
Movie number	Treatment	Total number of scans	number of scans with ectopic prodding	Total number of pauses during scanning	Number of pauses with ectopic prodding
27 (exp 1)	mock 1	1	0	3	0					Treatment	Total number of scans	number of scans with ectopic prodding		Treatment	Total number of pauses during scanning	Number of pauses with ectopic prodding
28 (exp 1)	mock 2	1	0	0	0					MOCK	46	2		MOCK	38	3
34 (exp 1)	mock3	1	0	0	0					ABLATED	72	4		ABLATED	94	11
36 (exp 1)	mock4	2	0	4	0
41 (exp 1)	mock5	1	0	0	0
44 (exp 1)	mock 6	2	0	2	0					Treatment	% of scans with ectopic prodding			Treatment	% of pauses with ectopic prodding
45 (exp 1)	mock 7	1	0	1	0					MOCK	4.34783			MOCK	7.89474
1 (exp 2)	MOCK 8	5	1	9	2					ABLATED	5.55556			ABLATED	11.7021
4 (exp 2)	MOCK 9	1	0	1	0
8 (exp 2)	MOCK 10	4	0	5	0
9 (exp 2)	MOCK 10	2	0	0	0
15 (exp 2)	MOCK 10	1	0	0	0
16 (exp 2)	MOCK 11	1	0	0	0					* Note that scans with more than one prodding event (due to several pauses with ectopic prodding) were counted as one scan with ectopic prodding.
18 (exp 2)	MOCK 12	1	0	0	0
19 (exp 2)	MOCK 12	1	0	0	0
22 (exp 2)	MOCK 13	2	0	1	0				c2 test of number of scans with or without ectopic prodding performed by mock ablated vs. PHD ablated animals.					c2 test of number of pauses during scanning with or without ectopic prodding performed by mock ablated vs. PHD ablated animals
23 (exp 2)	MOCK 13	7	0	0	0				Chi-square					Chi-square
27 (exp 2)	MOCK 14	1	0	0	0				Chi-square, df	0,08483, 1				Chi-square, df	0,4137, 1
28 (exp 2)	MOCK 15	2	0	4	0				z	0.2913				z	0.6432
32 (exp 2)	MOCK 16	1	0	0	0				P value	0.7709				P value	0.5201
34 (exp 2)	MOCK 17	2	0	0	0				P value summary	ns				P value summary	ns
2 (exp 3)	MOCK 18	1	0	0	0				One- or two-tailed	Two-tailed				One- or two-tailed	Two-tailed
4 (exp 3)	MOCK 19	1	0	0	0				Statistically significant? (alpha<0.05)	No				Statistically significant? (alpha<0.05)	No
6 (exp 3)	MOCK 20	3	1	7	1
7 (exp 3)	MOCK 21	1	0	1	0				Data analyzed	SCANS WITH ECTOPIC PRODING	SCANS WITHOUT ECTOPIC PRODING	Total		Data analyzed	PAUSES WITH ECTOPIC PRODING	PAUSES WITHOUT ECTOPIC PRODING	Total
26 (exp 1)	ablated 1	1	0	0	0				MOCK	2	44	46		MOCK	3	35	38
29 (exp 1)	ablated 2	1	0	2	0				ABLATED	4	68	72		ABLATED	11	83	94
31 (exp 1)	ablated 3	1	0	3	0				Total	6	112	118		Total	14	118	132
39 (exp 1)	ablated 4	4	0	3	0
40 (exp 1)	ablated 5	1	0	0	0
42 (exp 1)	ablated 6	1	0	1	0
43 (exp 1)	ablated 6	6	1	15	8
46 (exp 1)	ablated 7	1	0	2	0
48 (exp 1)	ablated 8	2	0	0	0
50 (exp 1)	ablated 8	2	0	0	0
3 (exp 2)	ABLATED 9	1	0	0	0
6 (exp 2)	ABLATED 10	1	0	0	0
10 (exp 2)	ABLATED 11	1	0	2	0
11 (exp 2)	ABLATED 11	3	0	5	0
12 (exp 2)	ABLATED 11	1	0	3	0
13 (exp 2)	ABLATED 10	1	0	5	0
20 (exp 2)	ABLATED 12	3	0	6	0
21 (exp 2)	ABLATED 12	3	0	8	0
24 (exp 2)	ABLATED 13	1	0	0	0
25 (exp 2)	ABLATED 14	2	0	1	0
29 (exp 2)	ABLATED 15	6	0	10	0
31 (exp 2)	ABLATED 15	7	3	11	3
9 (exp 3)	ABLATED 16	11	0	7	0
10 (exp 3)	ABLATED 17	7	0	7	0
11 (exp 3)	ABLATED 18	1	0	0	0
12 (exp 3)	ABLATED 19	1	0	1	0
16 (exp 3)	ABLATED 20	2	0	2	0
