# Supplementary material for: Direct glia-to-neuron transdifferentiation gives rise to a pair of male-specific neurons that ensure nimble male mating
Source: eLife. 2020 Nov 3;9:e48361. doi: 10.7554/eLife.48361 (PMC7609048; doi:10.7554/eLife.48361)
Supplement: Figure 7—source data 1. [file elife-48361-fig7-data1.xlsx]

## Sheet: Fig. 7-A_Food leaving 
testDate	wormType	time	censor
2017-09-05	PHDmock	8	1					Maximum likelihood statistical analysis comparing PL (probability of leaving per worm per hour) values.
2017-09-05	PHDmock	24	1					Genotype: PHDablated
2017-09-05	PHDmock	24	1					Pooled estimates:
2017-09-05	PHDmock	24	1					lambda = 0.05630631 ( 0.03804668 , 0.08332923 )
2017-09-05	PHDmock	24	0					P(hom) = 0.0008851872
2017-09-05	PHDmock	24	0					P(gof) = 0.9541112
2017-09-05	PHDmock	24	0					N = 33
2017-09-05	PHDablated	5	1					Based on 5 reps:
2017-09-05	PHDablated	5	1					2/18/17 lambda = 0.01503759 ( 0.003760867 , 0.06012689 ) N = 7
2017-09-05	PHDablated	8	1					2/2/17 lambda = 0.02970297 ( 0.009579844 , 0.09209612 ) N = 5
2017-09-05	PHDablated	8	1					5/9/17 lambda = 0.06153846 ( 0.03077524 , 0.1230529 ) N = 9
2017-09-05	PHDablated	8	1					6/1/17 lambda = 0.109375 ( 0.05214277 , 0.2294257 ) N = 7
2017-09-05	PHDablated	24	1					7/7/17 lambda = 0.3125 ( 0.1300712 , 0.7507908 ) N = 5
2017-09-05	PHDablated	24	1
2017-09-05	PHDablated	24	1					Genotype: PHDmock
2017-09-05	PHDablated	24	0					Pooled estimates:
2/2/17	PHDmock	2	1					lambda = 0.06432749 ( 0.04573213 , 0.09048399 )
2/2/17	PHDmock	2	1					P(hom) = 0.05031157
2/2/17	PHDmock	5	1					P(gof) = 0.949292
2/2/17	PHDmock	8	1					N = 39
2/2/17	PHDmock	8	1					Based on 5 reps:
2/2/17	PHDmock	24	1					2/18/17 lambda = 0.07142857 ( 0.03572126 , 0.1428293 ) N = 9
2/2/17	PHDmock	24	1					2/2/17 lambda = 0.05517241 ( 0.02759159 , 0.1103233 ) N = 10
2/2/17	PHDmock	24	1					5/9/17 lambda = 0.02631579 ( 0.009876786 , 0.07011601 ) N = 7
2/2/17	PHDmock	24	0					6/1/17 lambda = 0.115942 ( 0.05798234 , 0.2318388 ) N = 8
2/2/17	PHDmock	24	0					7/7/17 lambda = 0.1428571 ( 0.05946112 , 0.3432186 ) N = 5
2/2/17	PHDablated	5	1
2/2/17	PHDablated	24	1
2/2/17	PHDablated	24	1					Constrast: PHDablated vs. PHDmock
2/2/17	PHDablated	24	0					P = 0.6145093
2/2/17	PHDablated	24	0
2/18/17	PHDmock	2	1
2/18/17	PHDmock	2	1
2/18/17	PHDmock	2	1
2/18/17	PHDmock	5	1
2/18/17	PHDmock	5	1
2/18/17	PHDmock	24	1
2/18/17	PHDmock	24	1
2/18/17	PHDmock	24	1
2/18/17	PHDmock	24	0
2/18/17	PHDablated	5	1
2/18/17	PHDablated	8	1
2/18/17	PHDablated	24	0
2/18/17	PHDablated	24	0
2/18/17	PHDablated	24	0
2/18/17	PHDablated	24	0
2/18/17	PHDablated	24	0
6/1/17	PHDmock	2	1
6/1/17	PHDmock	2	1
6/1/17	PHDmock	2	1
6/1/17	PHDmock	2	1
6/1/17	PHDmock	5	1
6/1/17	PHDmock	8	1
6/1/17	PHDmock	24	1
6/1/17	PHDmock	24	1
6/1/17	PHDablated	2	1
6/1/17	PHDablated	2	1
6/1/17	PHDablated	2	1
6/1/17	PHDablated	5	1
6/1/17	PHDablated	5	1
6/1/17	PHDablated	24	1
6/1/17	PHDablated	24	1
7/7/17	PHDmock	2	1
7/7/17	PHDmock	2	1
7/7/17	PHDmock	2	1
7/7/17	PHDmock	5	1
7/7/17	PHDmock	24	1
7/7/17	PHDablated	2	1
7/7/17	PHDablated	2	1
7/7/17	PHDablated	2	1
7/7/17	PHDablated	5	1
7/7/17	PHDablated	5	1

## Sheet: Fig. 7-B_Response efficiency 
Experiment	Treatment	Response efficiency	Number of contacts befores response
Exp 1	mock 1	1	1			Treatment	Average response efficiency	SEM
	mock 2	1	1			MOCK	0.673611	0.07169
	mock3	1	1			ABLATED	0.6375	0.07884
	mock4	1	1
	mock5	1	1
	mock6	0	0
	mock7	1	1
Exp 2	mock 8	0.333333	3			Mann Whitney U test comparing response efficiency between mock ablated and PHD ablated animals
	mock 9	0.25	4			Column A		mock response unc and wt
	mock 10	0.5	2			vs.		vs.
	mock 11	0.25	4			Column B		abl response unc and wt
	mock 12	1	1
	mock 13	0.25	4			Mann Whitney test
	mock 14	1	1			P value		0.4786
Exp 3	mock 15	0.5	2			Exact or approximate P value?		Exact
	mock 16	0.5				P value summary		ns
	mock 17	0.333333	3			Significantly different (P < 0.05)?		No
	mock 18	0.5	2			One- or two-tailed P value?		Two-tailed
	mock 19	1	1			Sum of ranks in column A,B		1088 , 865.5
	mock 20	1	1			Mann-Whitney U		430.5
	mock 21	0.25	4
	mock 22	1	1			Difference between medians
	mock 23	0.5	2			Median of column A		0.5, n=33
	mock 24	1	1			Median of column B		0.5, n=29
exp 1	ablated 1	1	1			Difference: Actual		0
	ablated 2	0.5	2			Difference: Hodges-Lehmann		0
	ablated 3	1	1
	ablated 4	1	1
	ablated 5	0.333333	3
	ablated 6	1	1
	ablated 7	1	1
exp 2	ablated 8	0.166667	6
	ablated 9	1	1
	ablated 10	0.25	4
	ablated 11	1	1
	ablated 12	0.166667	6
	ablated 13	1	1
	ablated 14	1	1
	ablated 15	0.5	2
exp 3	ablated 16	0.25	4
	ablated 17	0.5	2
	ablated 18	0.25	4
	ablated 19	0.333333	3
	ablated 20	0.5	2

## Sheet: Fig.7-B_Hesitation in response 
Movie number	Treatment	Switching B/F from first contact to first turn or till LOV (yes or not)
27 (exp 1)	mock 1	YES			Treatment	Number of males that hesitate	Number of males that do not hesitate
28 (exp 1)	mock 2	NO			MOCK	8	13
34 (exp 1)	mock3	NO			ABLATED	11	9
36 (exp 1)	mock4	NO
41 (exp 1)	mock5	NO
44 (exp 1)	mock 6	NO			Treatment	% males that hesitate	% males that do not hesitate
45 (exp 1)	mock 7	NO			MOCK	38.0952	61.9048
1 (exp 2)	MOCK 8	NO			ABLATED	55	45
4 (exp 2)	MOCK 9	YES
8 (exp 2)	MOCK 10	NO
9 (exp 2)	MOCK 10	NO
15 (exp 2)	MOCK 10	YES			c2 test of number of males that do hesitate vs males that do not hesitate
16 (exp 2)	MOCK 11	NO			Chi-square
18 (exp 2)	MOCK 12	NO			Chi-square, df	1,177, 1
19 (exp 2)	MOCK 12	NO			z	1.085
22 (exp 2)	MOCK 13	NO			P value	0.2779
23 (exp 2)	MOCK 13	NO			P value summary	ns
27 (exp 2)	MOCK 14	YES			One- or two-tailed	Two-tailed
28 (exp 2)	MOCK 15	YES			Statistically significant? (alpha<0.05)	No
32 (exp 2)	MOCK 16	YES
34 (exp 2)	MOCK 17	YES			Data analyzed	HESITATION	NO HESITATION	Total
2 (exp 3)	MOCK 18	NO			MOCK	8	13	21
4 (exp 3)	MOCK 19	NO			ABLATED	11	9	20
6 (exp 3)	MOCK 20	YES			Total	19	22	41
7 (exp 3)	MOCK 21	NO
26 (exp1)	ablated 1	YES
29 (exp 1)	ablated 2	NO
31 (exp 1)	ablated 3	NO
39 (exp 1)	ablated 4	NO
40 (exp 1)	ablated 5	YES
42 (exp 1)	ablated 6	NO
46 (exp 1)	ablated 7	NO
48 (exp 1)	ablated 8	YES
50 (exp 1)	ablated 8	YES
3 (exp 2)	ABLATED 9	NO
6 (exp 2)	ABLATED 10	NO
10 (exp 2)	ABLATED 11	YES
11 (exp 2)	ABLATED 11	YES
12 (exp 2)	ABLATED 11	YES
13 (exp 2)	ABLATED 10	YES
21 (exp 2)	ABLATED 12	NO
24 (exp 2)	ABLATED 13	YES
25 (exp 2)	ABLATED 14	NO
29 (exp 2)	ABLATED 15	NO
31 (exp 2)	ABLATED 15	YES
9 (exp 3)	ABLATED 16	YES
10 (exp 3)	ABLATED 17	YES
11 (exp 3)	ABLATED 18	NO
12 (exp 3)	ABLATED 19	YES
16 (exp 3)	ABLATED 20	YES

## Sheet: Fig. 7-C_Scans ablations
Movie number	Treatment	Total number of scans	number of scans with pauses	number of scans with switches	Scans with pauses and switches	Number of continous scans
27 (exp 1)	mock 1	1	0	0	1	0				Treatment	Total number of scans	number of scans with pauses	number of scans with switches	Scans with pauses and switches	Number of continous scans
28 (exp 1)	mock 2	1	0	0	0	1				MOCK	46	10	5	10	21
34 (exp 1)	mock3	1	0	0	0	1				ABLATED	72	19	11	33	9
36 (exp 1)	mock4	2	2	0	0	0
41 (exp 1)	mock5	1	0	1	0	0
44 (exp 1)	mock 6	2	1	0	0	1
45 (exp 1)	mock 7	1	1	0	0	0				Treatment	% of scans with pauses	% of scans with switches	% of scans with pauses and switches	% of continous scans
1 (exp 2)	MOCK 8	5	1	0	4	0				MOCK	21.7391	10.8696	21.7391	45.6522
4 (exp 2)	MOCK 9	1	0	0	1	0				ABLATED	26.3889	15.2778	45.8333	12.5
8 (exp 2)	MOCK 10	4	3	0	0	1
9 (exp 2)	MOCK 10	2	0	1	0	1
15 (exp 2)	MOCK 10	1	0	0	0	1
16 (exp 2)	MOCK 11	1	0	0	0	1
18 (exp 2)	MOCK 12	1	0	0	0	1				c2 test of continuous and discontinuous scans performed by mock ablated and PHD ablated animals
19 (exp 2)	MOCK 12	1	0	0	0	1				Chi-square, df	16,27, 1
22 (exp 2)	MOCK 13	2	1	0	0	1				z	4.034
23 (exp 2)	MOCK 13	7	0	0	0	7				P value	< 0,0001
27 (exp 2)	MOCK 14	1	0	1	0	0				P value summary	****
28 (exp 2)	MOCK 15	2	0	1	1	0				One- or two-tailed	Two-tailed
32 (exp 2)	MOCK 16	1	0	1	0	0				Statistically significant? (alpha<0.05)	Yes
34 (exp 2)	MOCK 17	2	0	0	0	2
2 (exp 3)	MOCK 18	1	0	0	0	1				Data analyzed	CONTINOUS	DISCONTINOUS	Total
4 (exp 3)	MOCK 19	1	0	0	0	1				MOCK	21	25	46
6 (exp 3)	MOCK 20	3	0	0	3	0				ABLATED	9	63	72
7 (exp 3)	MOCK 21	1	1	0	0	0				Total	30	88	118
26 (exp 1)	ablated 1	1	0	0	0	1
29 (exp 1)	ablated 2	1	1	0	0	0
31 (exp 1)	ablated 3	1	1	0	0	0
39 (exp 1)	ablated 4	4	1	2	1	0
40 (exp 1)	ablated 5	1	0	1	0	0
42 (exp 1)	ablated 6	1	0	0	1	0
43 (exp 1)	ablated 6	6	1	1	4	0
46 (exp 1)	ablated 7	1	1	0	0	0
48 (exp 1)	ablated 8	2	0	2	0	0
50 (exp 1)	ablated 8	2	0	1	0	1
3 (exp 2)	ABLATED 9	1	0	1	0	0
6 (exp 2)	ABLATED 10	1	0	0	0	1
10 (exp 2)	ABLATED 11	1	1	0	0	0
11 (exp 2)	ABLATED 11	3	2	0	1	0
12 (exp 2)	ABLATED 11	1	0	0	1	0
13 (exp 2)	ABLATED 10	1	0	0	1	0
20 (exp 2)	ABLATED 12	3	1	0	2	0
21 (exp 2)	ABLATED 12	3	1	0	2	0
24 (exp 2)	ABLATED 13	1	0	1	0	0
25 (exp 2)	ABLATED 14	2	0	0	1	1
29 (exp 2)	ABLATED 15	6	2	0	3	1
31 (exp 2)	ABLATED 15	7	2	0	5	0
9 (exp 3)	ABLATED 16	11	2	1	5	3
10 (exp 3)	ABLATED 17	7	2	1	4	0
11 (exp 3)	ABLATED 18	1	0	0	0	1
12 (exp 3)	ABLATED 19	1	0	0	1	0
16 (exp 3)	ABLATED 20	2	1	0	1	0

## Sheet: Fig. 7-C_Ca2+ scans
Time locked to the transtion from forward to backward during scanning																													Time locked to the transtion from backward to forward during scanning
																					Plot 7C																				Plot 7C
Ca1(158-218-278)	Ca1(722-782-842)	Ca2( 294-354- 414)	Ca2 (510-570-630)	Ca2(662-722-782)	Ca2 (818-878-938)	Ca2(1234-1294-1354)	Ca2(1312-1372-1432)	Ca2(1769-1829-1889)	Ca21(146-206-266)	Ca23 (56-116-176)	Ca24b(616-676-736)	Ca24b(951-1011-1071)	Ca24b(1420-1480-1540)	14-Dec-16_2(927-987-1047)	14-Dec-16_2(1184-1244-1304)						average	SEM	plus	minus					Ca2(241-301-361)	Ca2 (433-493-553)	Ca2 (728-788-848)	Ca2 (910-970-1030)	Ca8(313-373-433)	Ca16(1112-1172-1232)	Ca24b(735-795-855)	Ca24b(983-1043-1103)					average	SEM	plus	minus
-0.353188	0.102151	0.594176	0.0379915	0.00942294	-0.354637	0.887563	0.311451	0.182262	0.72951	-0.807667	0.0420629	-0.00988321	-2.58423	0.0644646	0.189378	0.22329					-0.043287	0.181314	0.138027	-0.224601					0.601468	-0.0639664	-1.33268	-0.217091	-1.02379	0.49295	0.0704664	-0.0857473					-0.194798	0.224983	0.0301852	-0.419781
-0.295293	0.165791	0.659502	-0.00562463	0.0836572	-0.382919	0.903431	0.284246	0.252714	0.636135	-0.73911	0.0456407	0.016988	-2.53797	0.113223	0.288025	0.184905					-0.0192155	0.178671	0.159455	-0.197886					0.756613	-0.0265229	-1.31292	-0.176633	-0.961013	0.462008	0.0681704	-0.120689					-0.163874	0.227809	0.0639354	-0.391682
-0.211154	0.107129	0.600726	-0.025714	0.0925994	-0.417706	0.888456	0.308132	0.200369	0.640323	-0.687761	0.0521148	0.0147007	-2.43737	0.129597	0.380971	0.112702					-0.0148169	0.172133	0.157316	-0.18695					0.804612	-0.00814891	-1.28769	-0.151685	-0.957959	0.401478	0.0229185	-0.153729					-0.166276	0.225743	0.0594672	-0.392019
-0.156199	0.102258	0.564463	-0.0302	0.102092	-0.44162	0.823248	0.331107	0.252693	0.56236	-0.399426	0.0816435	0.0108411	-2.31672	0.135103	0.140341	0.0547084					-0.0107829	0.159305	0.148522	-0.170088					0.755628	0.00580694	-1.25445	-0.0357538	-0.889298	0.319388	0.0301684	-0.156976					-0.153185	0.213683	0.0604977	-0.366868
-0.200447	-0.0367311	0.572729	-0.041505	0.0628193	-0.392449	0.776158	0.310467	0.321833	0.603344	-0.307217	0.104912	0.024357	-2.13637	0.0896987	0.0275914	0.00261727					-0.0128347	0.148834	0.135999	-0.161669					0.769773	0.0144826	-1.25534	0.0494378	-0.895877	0.263861	0.0434295	-0.162729					-0.14662	0.214538	0.0679183	-0.361159
-0.131152	-0.129807	0.49121	-0.031251	0.104955	-0.33764	0.742062	0.313199	0.282089	0.592805	-0.0708893	0.0896192	0.0474231	-1.92352	0.0385661	-0.0490365	-0.0366248					-0.000470049	0.134474	0.134004	-0.134944					0.681533	0.0721132	-1.21938	0.105768	-0.875075	0.284766	0.00686946	-0.153158					-0.137071	0.206552	0.0694811	-0.343623
-0.0998198	-0.270471	0.393612	-0.0588502	0.0916726	-0.307885	0.645904	0.322429	0.231752	0.630611	0.0872136	0.0964956	0.0551151	-1.67818	-0.0026177	-0.228436	-0.106874					-0.0116663	0.121049	0.109383	-0.132715					0.630173	0.0691213	-1.24867	0.227648	-0.923885	0.271698	0.0431853	-0.157827					-0.13607	0.21153	0.0754601	-0.347601
-0.0142724	-0.329841	0.26783	-0.0471857	0.119021	-0.312241	0.392268	0.31769	0.218876	0.707699	0.231702	0.11914	0.073467	-1.42503	0.0132098	-0.406818	-0.0849027					-0.00937564	0.108297	0.0989214	-0.117673					0.521393	0.116672	-1.28948	0.388835	-0.983526	0.216155	0.0182739	-0.142394					-0.144259	0.217036	0.0727769	-0.361295
0.0092841	-0.344823	0.163589	-0.0193532	0.0992247	-0.316804	0.319264	0.315274	0.219065	0.697996	0.317826	0.132388	0.0961477	-1.19723	-0.0301231	-0.530092	-0.041303					-0.00645092	0.0993105	0.0928596	-0.105761					0.371897	0.158274	-1.30417	0.323508	-1.01735	0.22442	0.0265625	-0.117986					-0.166855	0.212548	0.0456931	-0.379403
-0.111872	-0.453847	0.183599	0.0294175	0.119916	-0.195823	0.251276	0.38521	0.145001	0.706747		0.107725	0.0560937	-1.02095	-0.0631785	-0.697197	-0.0618752					-0.0387347	0.0975252	0.0587905	-0.13626					0.187985	0.0817065	-1.32102	0.448721	-1.0159	0.22329	0.043161	-0.0737132					-0.178221	0.211704	0.0334826	-0.389925
-0.307144	-0.500783	0.164163	0.0033721	0.087349	-0.118776	0.267479	0.35565	0.235588	0.645904		0.0845771	0.0828316	-0.909754	-0.116536	-0.840897	-0.0170014					-0.0552486	0.0977821	0.0425336	-0.153031					0.0856646	0.0601786	-1.27237	0.462972	-1.01704	0.203607	0.0856956	-0.0401156					-0.178927	0.205978	0.0270515	-0.384905
-0.179216	-0.540532	0.185726	0.0166683	0.0811003	-0.0361709	0.247262	0.306475	0.207607	0.622906		0.0660163	0.0995207	-0.778268	-0.147372	-0.843634	0.0148633					-0.0423156	0.0919126	0.049597	-0.134228					0.0271434	0.0107776	-1.25013	0.611264	-0.979358	0.259354	0.0676618	-0.0594057					-0.164087	0.209172	0.0450855	-0.373259
-0.169826	-0.560328	0.177531	0.060547	0.162736	0.100784	0.258974	0.333674	0.255008	0.599531		0.0417623	0.0876009	-0.648367	-0.129473	-0.874184	0.070538					-0.0145932	0.0909336	0.0763405	-0.105527					-0.104059	-0.030179	-1.23528	0.720795	-0.902125	0.344087	0.0569759	-0.0517445					-0.150191	0.211378	0.0611872	-0.36157
-0.26533	-0.532314	0.194294	0.0657016	0.257308	0.150878	0.22682	0.368752	0.357054	0.556862		0.0466283	0.0883774	-0.542215	-0.107104	-0.838908	0.110334					0.00857119	0.0890836	0.0976548	-0.0805124					-0.173229	-0.0693202	-1.15907	0.761668	-0.904937	0.322539	0.0394751	-0.026352					-0.151153	0.207051	0.0558975	-0.358204
-0.203716	-0.517169	0.163155	0.0857312	0.330594	0.209352	0.152757	0.368305	0.446913	0.515011		0.0598261	0.0920676	-0.51357	-0.0791371	-0.70467	0.181565					0.0366885	0.0841613	0.12085	-0.0474729					-0.220819	-0.089006	-1.07957	0.961304	-0.844272	0.371877	0.0143648	-0.0482561					-0.116797	0.214207	0.0974105	-0.331004
-0.290699	-0.472851	0.181055	0.0990095	0.443565	0.296282	0.107561	0.346057	0.660523	0.463817		0.0334695	0.0863706	-0.525242	-0.103989	-0.627635	0.1782					0.0547183	0.0880573	0.142776	-0.033339					-0.222926	-0.12817	-1.00608	1.01478	-0.810349	0.408779	0.0102279	-0.0399525					-0.096711	0.213019	0.116308	-0.30973
-0.195952	-0.498179	0.131628	0.107203	0.488541	0.457902	0.108049	0.347629	0.806502	0.422236		0.0277085	0.0841112	-0.447488	-0.0733146	-0.526122	0.10629					0.0841714	0.0885235	0.172695	-0.00435211					-0.226262	-0.14694	-0.940519	1.05914	-0.823795	0.429826	0.0104778	-0.0261507					-0.0830277	0.214112	0.131084	-0.29714
-0.188377	-0.488219	0.101958	0.0844783	0.5213	0.54307	0.0353339	0.234021	0.908156	0.409752		0.0606637	0.0745646	-0.39328	-0.067377	-0.554696	0.0834432					0.0852994	0.0918176	0.177117	-0.00651824					-0.196597	-0.130873	-0.832476	1.13584	-0.876754	0.443885	0.0218382	-0.0396494					-0.0593482	0.217436	0.158088	-0.276784
-0.141985	-0.561427	0.104919	0.107392	0.618494	0.601584	-0.0235882	0.249471	0.904577	0.353009		0.0874157	0.0538166	-0.345739	-0.04578	-0.415091	0.0306421					0.098607	0.091503	0.19011	0.00710396					-0.221218	-0.0998555	-0.845885	1.0691	-0.869943	0.516654	0.00333714	-0.0597256					-0.0634425	0.215012	0.15157	-0.278455
-0.310626	-0.551104	0.091247	0.107653	0.565143	0.530928	0.0453986	0.263381	0.879696	0.365817		0.0995821	0.036961	-0.296694	-0.0416542	-0.338878	-0.0290178					0.0886146	0.0880698	0.176684	0.000544758					-0.207229	-0.0833849	-0.753726	0.942483	-0.926132	0.529197	0.0084086	-0.0550623					-0.0681808	0.203538	0.135358	-0.271719
-0.25534	-0.432816	0.0898619	0.0733896	0.491361	0.452525	0.0246204	0.225861	0.894102	0.299737		0.12249	0.0509649	-0.290677	-0.0295634	-0.251474	-0.0844671					0.086286	0.079569	0.165855	0.00671701					-0.202095	-0.0440729	-0.658055	0.756832	-0.959045	0.591936	0.024765	-0.051747					-0.0676851	0.190464	0.122778	-0.258149
-0.151566	-0.418954	0.0891056	0.0961097	0.393617	0.420683	0.0432137	0.213465	0.855339	0.468786		0.119976	0.0676488	-0.350096	-0.0251907	-0.187389	-0.139822					0.0934329	0.0771132	0.170546	0.0163198					-0.200216	-0.0196381	-0.652595	0.709569	-0.969623	0.626251	0.0478462	-0.0464639					-0.0631086	0.19002	0.126912	-0.253129
-0.0992646	-0.423941	0.0873073	0.108834	0.305222	0.436126	0.0508314	0.168467	0.828227	0.637793		0.103027	0.0752038	-0.300438	-0.0584142	-0.311957	-0.172252					0.0896732	0.0799662	0.169639	0.00970704					-0.211898	0.0491628	-0.608804	0.462587	-1.03557	0.612178	0.0463285	-0.0258041					-0.0889778	0.179001	0.0900228	-0.267978
-0.166614	-0.472314	0.147614	0.115821	0.23821	0.320102	0.0881594	0.184778	0.630509	0.674219		0.130838	0.083617	-0.156998	-0.0674127	-0.399742	-0.243921					0.069179	0.0754546	0.144634	-0.00627557					-0.155636	0.0570188	-0.491736	0.399155	-1.0068	0.674522	0.0593722	-0.0272138					-0.0614142	0.172347	0.110932	-0.233761
-0.250127	-0.360678	0.173656	0.0901984	0.185112	0.187544	0.0492895	0.182389	0.477812	0.817135		0.130677	0.0944061	-0.219509	-0.05179	-0.496556	-0.253162					0.0472749	0.0766382	0.123913	-0.0293633					-0.121514	0.122595	-0.349016	0.336633	-0.970027	0.626333	0.0499101	-0.0283367					-0.041678	0.158744	0.117066	-0.200422
-0.315051	-0.365929	0.163406	0.101509	0.156423	0.0737579	0.0731862	0.166899	0.372736	0.844747		0.106721	0.109086	-0.204042	-0.0282767	-0.0570742	-0.238047					0.0600032	0.0681887	0.128192	-0.00818546					-0.167281	0.120912	-0.204319	0.169578	-0.901397	0.623736	0.0181487	-0.0251896					-0.0457265	0.143588	0.0978616	-0.189315
-0.366709	-0.250293	0.243947	0.0903597	0.138819	-0.0755777	0.0628296	0.168575	0.265526	0.856615		0.0771197	0.123655	-0.135799	0.00279367	-0.192879	-0.242624					0.0478973	0.0674129	0.11531	-0.0195155					-0.160343	0.137873	-0.0339219	0.212742	-0.835906	0.574831	0.0227204	-0.0331524					-0.0143946	0.133349	0.118954	-0.147743
-0.0611895	-0.380122	0.258617	0.0743236	0.174735	-0.0821209	0.0967035	0.141547	0.229483	0.794113		0.0547224	0.12139	-0.0362882	0.0407169	-0.134798	-0.229883					0.0663718	0.0606465	0.127018	0.00572533					-0.120473	0.120196	0.0792494	0.232298	-0.7702	0.517147	0.0206212	-0.0219623					0.00710965	0.122821	0.129931	-0.115711
-0.0785429	-0.424644	0.264415	0.0820115	0.179698	-0.178056	0.161022	0.157517	0.110077	0.778239		0.029695	0.118602	-0.00416332	0.0586144	-0.044394	-0.213613					0.0622798	0.0608832	0.123163	0.00139653					-0.132996	0.106496	0.144425	0.332952	-0.7108	0.392099	0.0137751	-0.0326914					0.0141574	0.114044	0.128201	-0.0998865
-0.103858	-0.37513	0.279758	0.0272785	0.228878	-0.1617	0.148226	0.0939141	0.0169922	0.540976		0.029399	0.0793215	0.093053	0.0844087	-0.0377856	-0.257543					0.0428868	0.0507323	0.0936191	-0.0078455					-0.0874479	0.0931398	0.232288	0.270563	-0.618693	0.397496	-0.00546775	-0.0524693					0.0286762	0.103929	0.132605	-0.0752524
-0.153158	-0.327206	0.333876	-0.0192664	0.218335	-0.210946	0.109728	0.0819942	-0.0636897	0.309184		0.0213502	0.0881258	0.115937	0.0910028	0.0569491	-0.274948					0.0235792	0.045278	0.0688572	-0.0216988					-0.0453775	0.0364879	0.221293	0.223681	-0.497261	0.384338	-0.000357597	-0.0450195					0.0347231	0.0881701	0.122893	-0.0534469
-0.0998621	-0.335048	0.302658	-0.024575	0.114109	-0.203401	0.0295062	0.0627115	-0.123237	0.221579		-0.00596135	0.0622064	0.0918022	0.0794966	0.154325	-0.250515					0.00473715	0.0405214	0.0452586	-0.0357843					-0.098801	0.0540492	0.203265	0.138445	-0.407701	0.295319	-0.00176161	-0.0610247					0.0152236	0.0722071	0.0874307	-0.0569835
-0.113063	-0.411604	0.292244	-0.0362015	0.15209	-0.197434	0.0299988	0.0283098	-0.059635	0.0337176		-0.0106529	0.032239	0.185235	0.033724	0.27725	-0.163658					0.00453505	0.0420733	0.0466084	-0.0375383					-0.0726685	0.0270092	0.193958	0.0985261	-0.290471	0.251698	0.00636293	-0.0956674					0.0148434	0.0575275	0.0723709	-0.0426841
0.0470787	-0.279679	0.250711	-0.0378014	0.12615	-0.255074	0.0431677	0.0590443	-0.0940566	-0.0744543		-0.00335015	-0.00270278	0.218491	-0.00807329	-0.0178179	-0.142858					-0.0107015	0.034023	0.0233215	-0.0447246					-0.0253673	0.0781694	0.156926	0.104394	-0.221032	0.249477	0.00911413	-0.115503					0.0295222	0.0503674	0.0798897	-0.0208452
0.162552	-0.260684	0.174113	-0.0478469	0.0949948	-0.176424	0.075326	0.022787	-0.0630729	-0.100423		0.00101951	-0.035743	0.22183	-0.0567326	0.0274165	-0.0882441					-0.0030708	0.0304165	0.0273457	-0.0334873					0.0714548	0.0562232	0.0920672	0.108458	-0.112405	0.226196	0.0106158	-0.0751231					0.0471859	0.0356905	0.0828763	0.0114954
-0.0652734	-0.108465	0.128845	-0.0459709	0.123929	-0.160856	-0.0502345	0.0424613	-0.0271136	-0.0723261	0.0851115	-0.00104225	-0.0389896	0.162451	-0.103764	-0.0148152	-0.0974142					-0.0143215	0.021936	0.00761454	-0.0362575					0.0127422	0.0902081	0.018616	0.0263447	-0.0868288	0.217189	0.00558235	-0.0673169					0.0270671	0.0315606	0.0586277	-0.00449351
-0.0452083	-0.209908	0.0740766	-0.049111	0.0862546	-0.0990617	-0.0501219	-0.0338412	0.0375511	-0.0682456	0.0798374	-0.0201914	-0.0447431	0.103767	-0.149258	-0.141246	-0.107843					-0.0374877	0.0213001	-0.0161876	-0.0587878					-0.00613766	0.0670825	0.0514152	-0.0426731	-0.0641343	0.226676	-0.0397749	-0.0692611					0.015399	0.0330894	0.0484885	-0.0176904
0.00346261	-0.232378	-0.0113288	-0.00717755	-0.0153642	-0.139436	-0.0448842	0.00401106	0.0616819	-0.0441475	0.0716921	-0.0105322	-0.0351713	0.101473	-0.147254	-0.266902	-0.0876093					-0.0470508	0.0236879	-0.0233629	-0.0707387					0.00618756	0.067771	0.070562	-0.0574162	-0.0162024	0.138093	-0.0365446	-0.0577274					0.0143404	0.0236582	0.0379987	-0.00931781
-0.143982	-0.273096	0.00737755	0.0196215	-0.0075426	-0.0979911	-0.0360545	0.00874059	0.110969	-0.0288435	0.0477145	0.00424653	-0.0398407	0.0926597	-0.104717	-0.0824852	-0.0460276					-0.0334854	0.0215214	-0.011964	-0.0550068					-0.00323486	0.0935025	0.0962112	0.0404125	-0.0417982	0.0654189	-0.026854	-0.0583115					0.0206683	0.0204604	0.0411287	0.000207898
-0.0709689	-0.0994027	-0.011536	-0.00857579	0.0104727	-0.0318482	-0.0489015	-0.0101537	0.115228	-0.00633373	0.0301822	0.00968108	-0.0244079	0.0701774	-0.0500929	-0.0632163	-0.0252034					-0.0126411	0.0122281	-0.00041306	-0.0248692					0.0544894	0.022609	0.0610851	0.0175227	-0.0114939	0.017847	-0.00560653	-0.0414392					0.0143767	0.011314	0.0256907	0.00306269
0	0	0	0	0	0	0	0	0	0	0	0	0	0	0	0	0					0	0	0	0					0	0	0	0	0	0	0	0					0	0	0	0
-0.0695873	-0.00567103	0.0241923	0.00281762	-0.0501092	0.106968	-0.0345643	-0.0141504	-0.0137925	0.0256859	-0.00108982	-0.0336784	0.0442731	0.00926666	0.0580004	0.0309186	0.00196605					0.00479095	0.0100029	0.0147939	-0.00521196					-0.0273932	0.0319442	-0.0160085	-0.0601089	0.00464692	-0.0282754	0.000316222	0.0259807					-0.00861224	0.010191	0.0015788	-0.0188033
-0.0637026	-0.101771	0.0565306	0.0429039	-0.0984806	0.101927	-0.0358639	-0.00388454	-0.0440534	0.107687	0.0099928	-0.0454468	0.0778706	-0.0191847	0.103197	0.0987878	0.0945495					0.0165329	0.0174589	0.0339918	-0.000925943					-0.0862227	0.0402135	-0.0551319	-0.244438	0.0165331	-0.00504739	0.0010754	0.00609125					-0.0408658	0.0305551	-0.0103107	-0.0714209
-0.0900066	-0.108946	0.0814285	0.0417381	-0.180214	0.162545	-0.0492849	0.00477271	-0.0962604	0.144156	-0.0077596	-0.0396103	0.0585805	-0.0250866	0.144433	0.0512622	0.187595					0.0164319	0.0249822	0.0414141	-0.00855036					-0.031956	0.0570595	-0.0719551	-0.368293	-0.00313733	-0.0633073	0.0220369	0.00738857					-0.0565204	0.0443821	-0.0121384	-0.100903
-0.130132	-0.0333176	0.115365	0.0369119	-0.122557	0.088313	-0.118217	0.171375	-0.128636	0.16766	-0.0448982	-0.0447503	0.0662418	-0.0295036	0.182146	0.199233	0.258896					0.0373018	0.0305842	0.067886	0.00671761					0.0258565	0.0900294	-0.249768	-0.549569	-0.0613431	-0.0969134	0.0785198	0.0243476					-0.092355	0.071809	-0.020546	-0.164164
-0.198625	0.00311385	0.169486	0.0657861	-0.0269357	0.039293	-0.0819876	0.202666	-0.164833	0.172711	-0.0689453	-0.0778414	0.0916342	-0.0242609	0.162685	0.248292	0.403052					0.0538406	0.0373219	0.0911625	0.0165187					-0.0288327	0.0638464	-0.417297	-0.764562	-0.123418	-0.0978323	0.106331	0.0358777					-0.153236	0.0986533	-0.0545826	-0.251889
-0.183989	-0.0306869	0.154595	0.0532525	0.0266483	-0.000149917	-0.101405	0.519127	-0.140512	0.210063	-0.0669581	-0.106719	0.0697302	-0.00307626	0.163765	0.138549	0.57611					0.0751967	0.0496272	0.124824	0.0255695					-0.0946504	0.0594675	-0.546553	-0.964714	-0.194771	-0.101135	0.0975587	0.0428593					-0.212742	0.122107	-0.0906356	-0.334849
-0.229347	-0.148731	0.226124	0.0638368	0.0583774	-0.0526102	-0.0675895	0.728312	-0.0470805	0.199634	-0.0681202	-0.127576	0.0780338	-0.0648077	0.125589	0.195069	0.770504					0.0964481	0.0654919	0.16194	0.0309562					-0.101553	0.108741	-0.712922	-1.09565	-0.360623	-0.109531	0.073899	0.0649844					-0.266583	0.144423	-0.12216	-0.411006
-0.15047	-0.0811674	0.229003	0.0682455	0.0919656	-0.0218396	-0.122631	0.794208	-0.0523941	0.246701	-0.0768221	-0.133757	0.0918356	-0.0412458	0.1204	0.181355	0.937131					0.122384	0.072444	0.194828	0.0499395					-0.063161	0.0624647	-0.887663	-1.21075	-0.581848		0.0779338	0.0341297					-0.366985	0.175584	-0.191402	-0.542569
-0.0947872	-0.0534299	0.299517	0.0412798	0.0956366	-0.0737828	-0.0704582	0.904212	-0.0435112	0.284755	-0.0908112	-0.1287	0.0783369	-0.123367	0.0947248	0.224303	1.17086					0.147928	0.086007	0.233935	0.0619211					-0.0620992	-0.0410218	-1.04909	-1.32286	-0.729629		0.0626377	0.0485154					-0.441936	0.193773	-0.248163	-0.635709
-0.161794	0.0491226	0.346444	0.0646823	0.132353	-0.0173787	-0.0474693	1.02337	-0.0752733	0.250513	-0.0953035	-0.151055	0.0582607	-0.0348616	0.0915049	0.289918	1.2484					0.17479	0.0924155	0.267206	0.0823747					0.00887239	-0.0209958	-1.18833	-1.36236	-0.933044		0.062044	0.0435943					-0.484318	0.215297	-0.26902	-0.699615
-0.218169	0.0659804	0.350789	0.0561447	0.167732	-0.0822659	-0.0426961	1.15031	-0.086041	0.202057	-0.0806533	-0.182511	0.0629239	-0.0761106	0.096998	0.424724	1.37432					0.187267	0.104119	0.291386	0.0831473					0.0898223	-0.0843566	-1.39816	-1.39975	-1.0398		0.0453204	0.0370334					-0.535699	0.235904	-0.299795	-0.771603
-0.261604	0.0695705	0.383156	0.0609759	0.107285	-0.0522478	-0.00765306	1.09335	-0.104709	0.212119	-0.0769615	-0.183569	0.0662393	-0.067655	0.0987669	0.413271	1.39295					0.184899	0.10344	0.28834	0.081459					0.167848	-0.118639	-1.5101	-1.41325	-1.13831		0.034557	0.0170309					-0.565838	0.250035	-0.315802	-0.815873
-0.241468	0.0114896	0.3945	0.0441174	0.030529	0.0581556	-0.023324	1.20571	-0.11679	0.24187	-0.0744616	-0.173714	0.0715223	-0.128497	0.10196	0.511055	1.53809					0.202985	0.114042	0.317028	0.0889431					0.290161	-0.0957232	-1.57584	-1.41583	-1.23913		0.00747935	-0.0152646					-0.577735	0.264592	-0.313143	-0.842327
-0.267505	0.0151404	0.353862	0.0709786	-0.0255042	0.0948123	0.0994706	1.1686	-0.157462	0.263881	-0.0811485	-0.160865	0.0921822	-0.0823234	0.10209	0.494557	1.50398					0.204985	0.110812	0.315796	0.0941733					0.355486	-0.115697	-1.54761	-1.45421	-1.31802		3.76854e-06						-0.680009	0.283326	-0.396683	-0.963334
-0.15102	0.0775605	0.307113	0.065221	-0.0457642	0.0461873	0.164987	1.15049	-0.231836	0.299697	-0.067424	-0.162491	0.0907725	-0.0324128	0.123392	0.447365	1.56958					0.21479	0.111265	0.326054	0.103525					0.296711	-0.132018	-1.53237	-1.52641	-1.35418		0.010236						-0.706339	0.283783	-0.422556	-0.990123
-0.262939	-0.0135889	0.38686	0.0484659	-0.0853015	-0.00805267	0.275468	1.3254	-0.104817	0.294178	-0.0471033	-0.160029	0.0896496	-0.0980731	0.120653	0.454308	1.68561					0.229452	0.123279	0.352731	0.106174					0.260448	-0.119162	-1.36455	-1.58441	-1.34821		-0.00166698						-0.692925	0.274517	-0.418408	-0.967442
-0.370301	-0.113237	0.408314	0.0765578	-0.0749171	-0.00633064	0.346871	1.42649	-0.116939	0.285329	-0.0495316	-0.165578	0.0927967	-0.0607052	0.125624	0.407694	1.63176					0.226112	0.126407	0.352519	0.0997052					0.268714	-0.0685051	-1.4204	-1.6365	-1.37294		0.0183669						-0.701877	0.286825	-0.415053	-0.988702
-0.325104	-0.211261	0.36085	0.0263551	-0.104089	-0.0921243	0.358832	1.57781	-0.03414	0.285564	-9.67051e-05	-0.136669	0.0848339	-0.155917	0.129942	0.309732	1.70077					0.222076	0.134697	0.356773	0.0873793					0.187195	-0.129062	-1.40378	-1.67574	-1.40909		0.00014439						-0.738388	0.280659	-0.457729	-1.01905
-0.329791	-0.325815	0.408224	0.0795917	-0.0921371	-0.0923614	0.51859	1.63594	0.0159469	0.374678	0.0245787	-0.132894	0.096024	-0.198116	0.122203	0.287883	1.7587					0.244191	0.141198	0.385389	0.102993					0.0895965	-0.129804	-1.36619	-1.74599	-1.45231		0.0218628						-0.763806	0.280837	-0.482969	-1.04464
-0.285051	-0.308744	0.423851	0.0481456	-0.0752414	-0.0538687	0.621707	1.76445	0.15678	0.389783	0.0690856	-0.141449	0.0852949	-0.199487	0.138297	0.219025	1.89352					0.279182	0.149662	0.428844	0.129521					-0.0361847	-0.127672	-1.24964	-1.72402	-1.45459		0.00439524						-0.764618	0.264972	-0.499646	-1.02959
-0.38752	-0.29475	0.495278	0.00572231	-0.0755647	-0.158627	0.634292	1.86901	0.366663	0.385077	0.107561	-0.164867	0.065517	-0.212209	0.134978	0.165973	1.90439					0.28476	0.156817	0.441576	0.127943					-0.140426	-0.164887	-1.20903	-1.68042	-1.41731		0.00940679						-0.767111	0.249914	-0.517197	-1.01703
-0.31138	-0.268942	0.581748	0.00499911	-0.0782344	-0.220841	0.598646	1.81415	0.49632	0.37739	0.0869262	-0.214288	0.0729668	-0.249715	0.139237	0.093571	2.18715					0.300571	0.16675	0.46732	0.133821					-0.120416	-0.199024	-1.21167	-1.70099	-1.39882		0.006448						-0.770744	0.249803	-0.520942	-1.02055
-0.38608	-0.252979	0.626303	-0.00418656	-0.0887668	-0.165994	0.565064	1.84711	0.566902	0.326236	0.0670423	-0.223513	0.0569615	-0.219537	0.139193	0.149254	2.06647					0.298205	0.163675	0.46188	0.13453					-0.139852	-0.199865	-1.18126	-1.65612	-1.37986		-0.00964082						-0.761099	0.241573	-0.519527	-1.00267
-0.367753	-0.291512	0.593274	0.0204895	-0.0548453	-0.160351	0.519835	1.89401	0.56447	0.348124	0.0528041	-0.240014	0.0223188		0.174447	0.058838	1.90566					0.314987	0.161547	0.476534	0.153441					-0.118289	-0.19604	-1.30459	-1.62425	-1.35644		-0.0248663						-0.770746	0.243531	-0.527215	-1.01428
-0.222476	-0.259251	0.594954	0.036366	-0.0192541	-0.163426	0.488487	1.90443	0.813946	0.288062	0.0802432	-0.280827	0.00248293		0.207463	0.0417094						0.234194	0.132481	0.366675	0.101713					-0.126484	-0.231222	-1.29098	-1.56858	-1.38122		-0.0360154						-0.772416	0.236917	-0.535499	-1.00933
-0.358844	-0.195861	0.623571	0.055943	0.0204774	-0.111661	0.561013	2.04931	0.740353	0.256415	0.0801244	-0.327464	0.0428632		0.228673	-0.0452495						0.241311	0.140899	0.38221	0.100412					-0.109721	-0.226635	-1.29484	-1.52878	-1.34797		-0.0405598						-0.758084	0.233224	-0.52486	-0.991308
-0.431846	-0.139343	0.610627	0.0192812	0.0402305	0.000472912	0.509538	2.06423	0.666812	0.241105	0.0835911	-0.349595	0.0506694		0.263196	-0.185605						0.229557	0.141639	0.371196	0.0879183					-0.14086	-0.20744	-1.25224	-1.45755	-1.25553		-0.0709064						-0.730755	0.217705	-0.513049	-0.94846
-0.45319	-0.270774	0.61645	0.0494009	0.065459	0.0736022	0.481821	2.11231	0.498935	0.204575	-0.0170092	-0.36986	0.0487252		0.29392	-0.255308						0.205271	0.145314	0.350584	0.0599567					-0.12296	-0.171112	-1.3129	-1.46092	-1.22912		-0.0661028						-0.727186	0.223343	-0.503843	-0.95053
-0.43692	-0.407981	0.52902	0.100062	0.0987067	0.169302	0.545003	2.25877	0.302938	0.250729	-0.123236	-0.395488	0.0602589		0.356446	-0.00443003						0.220212	0.151991	0.372203	0.0682216					-0.172387	-0.175298	-1.37428	-1.53283	-1.2378		-0.0443658						-0.75616	0.231041	-0.525119	-0.987201
-0.51014	-0.382806	0.478804	0.0859583	0.0978143	0.319827	0.484639		0.176606	0.233279	-0.160663	-0.398492	0.0596747		0.398637	-0.00807716						0.0625045	0.0765139	0.139018	-0.0140094					-0.202057	-0.138477	-1.4203	-1.55567	-1.19072		-0.035997						-0.757203	0.234584	-0.52262	-0.991787
-0.605391	-0.544089	0.444112	0.136412	0.133769	0.416513	0.502329		0.194392	0.223538	-0.112404	-0.425229	0.0765471		0.455013	-0.0796644						0.0582748	0.0871488	0.145424	-0.0288739					-0.199096	-0.107773	-1.44242	-1.60847	-1.16311		-0.0439857						-0.760809	0.240406	-0.520403	-1.00122
-0.675853	-0.563368	0.443157	0.185464	0.104478	0.457003	0.472554		0.120689	0.179132	-0.22109	-0.476864	0.117986		0.466079	-0.134655						0.0339081	0.0926033	0.126511	-0.0586952					-0.212768	-0.0982212	-1.49728	-1.66813	-1.07847		-0.0535765						-0.768075	0.245211	-0.522864	-1.01329
-0.86896	-0.680836	0.378509	0.176126	0.0636735	0.534617	0.41867		-0.0258112	0.210906	-0.21556	-0.467557	0.143967		0.494921	-0.168604						-0.000424063	0.102646	0.102222	-0.10307					-0.214153	-0.0969137	-1.49217	-1.72358	-1.01094		-0.0500883						-0.76464	0.248059	-0.51658	-1.0127
-0.822708	-0.801313	0.400384	0.192421	0.0489868	0.613692	0.353787		0.0253616	0.229826	-0.33003	-0.489467	0.124078	-0.688766	0.573802	-0.150724						-0.0480446	0.113277	0.0652325	-0.161322					-0.214909	-0.0974386	-1.50046	-1.77894	-0.931706		-0.0440191						-0.761245	0.25231	-0.508934	-1.01356
-0.833296	-0.887795	0.388831	0.169039	0.0321358	0.612841	0.306611		0.118492	0.163393	-0.427595	-0.531433	0.125375	-0.659531	0.573124	-0.0745802						-0.0616259	0.115657	0.0540313	-0.177283					-0.216708	-0.0770968	-1.51817	-1.81137	-0.872514		-0.0283642						-0.754037	0.257745	-0.496292	-1.01178
-0.857877	-0.823932	0.347617	0.146128	0.0807815	0.60337	0.225139		0.295846	0.202984	-0.422199	-0.550517	0.142334	-0.669564	0.5791	-0.107308						-0.0538732	0.115546	0.0616729	-0.169419					-0.156401	-0.11646	-1.50015	-1.88304	-0.856519		-0.0315948						-0.75736	0.263623	-0.493738	-1.02098
-0.830034	-0.768618	0.388431	0.13115	0.103022	0.663757	0.155878		0.476165	0.167576	-0.393257	-0.561291	0.153864	-0.657691	0.585054	-0.430595						-0.0544392	0.119386	0.0649467	-0.173825					-0.130359	-0.123532	-1.43363	-1.89228	-0.805056		-0.0347774						-0.736605	0.260856	-0.475749	-0.997461
-0.846176	-0.909102	0.41312	0.165343	0.117872	0.696556	0.15009		0.603333	0.206998	-0.410784	-0.567453	0.160846	-0.628512	0.597318	-0.506133						-0.0504457	0.128492	0.0780463	-0.178938					-0.140609	-0.167148	-1.46228	-1.87716	-0.681197		-0.0682653						-0.732776	0.256325	-0.476451	-0.989102
-0.859963	-0.881413	0.430673	0.13724	0.194085	0.821845	0.122885		0.629656	0.330553	-0.523842	-0.599145	0.182971	-0.619412	0.591128	-0.643464						-0.0457469	0.137194	0.0914471	-0.182941					-0.0600684	-0.187237	-1.49104	-1.88174	-0.562009		-0.0570819						-0.706529	0.2636	-0.442929	-0.970128

## Sheet: Fig. 7-D_Turning efficiency
Experiment	Treatment	Turning efficiency	Number of good turns	Total number of trials
exp 1	mock 1	0.5	1	2			Treatment	Average proportion of good turns	SEM
	mock 2	0.3	4	14			MOCK	0.74688	0.05789
	mock 3	0	0	1			ABLATED	0.69104	0.06569
	mock 4	0.7	7	10
	mock 5	0.777778	7	9
	mock 7	0.625	5	8			Mann Whitney U test comparing turning efficiency between mock ablated and PHD ablated animals
exp 2	mock 8	1	2	2			Column D		mock turns unc and wt
	mock 9	1	1	1			vs.		vs.
	mock 10	0.428571	3	7			Column E		abl turns unc and wt
	mock 11	1	6	6
	mock 13	1	2	2			Mann Whitney test
	mock 14	1	2	2			P value		0.4373
exp 3	mock 15	0.6	6	10			Exact or approximate P value?		Exact
	mock 16	0.7	7	10			P value summary		ns
	mock 17	1	10	10			Significantly different (P < 0.05)?		No
	mock 18	0.7	7	10			One- or two-tailed P value?		Two-tailed
	mock 19	0.9	9	10			Sum of ranks in column D,E		479.5 , 340.5
	mock 20	0.7	7	10			Mann-Whitney U		169.5
	mock 21	1	10	10
	mock 22	0.6	6	10			Difference between medians
	mock 23	1	10	10			Median of column D		0.735, n=22
	mock 24	0.9	9	10			Median of column E		0.68, n=18
exp 1	ablated 1	0.5	1	2			Difference: Actual		0.055
	ablated2	0	0	1			Difference: Hodges-Lehmann		0.02
	ablated 3	0.8	8	10
	ablated 4	0.571429	4	7
	ablated 5	0.25	2	8
	ablated 6	0.666667	6	9
	ablated 7	1	11	11
exp 2	ablated 8	1	2	2
	ablated 9	1	1	1
	ablated 10	0.5	2	4
	ablated 12	0.875	7	8
	ablated 13	1	2	2
	ablated 14	1	2	2
	ablated 15	0.666667	2	3
	ablated 16	0.7	7	10
	ablated 17	0.6	6	10
	ablated 18	0.6	6	10
	ablated 19	0.6	6	10
	ablated 20	0.8	8	10

## Sheet: Fig. 7-E_Vulva location effi. 
Experiment	Treatment	Vulva location efficiency	Number of trials
exp 1	mock 1	0.5	2			Treatment	Average Vulva Location efficiency	SEM
	mock 2	1	1			MOCK	0.876812	0.05063
	mock3	1	1			ABLATED	0.824074	0.06652
	mock4	1	1
	mock5	1	1
	mock7	1	1			Mann Whitney U test comparing vulva location efficiency between mock ablated and PHD ablated animals
exp 2	mock8	1	1			Column G		mock lov unc and wt
	mock9	1	1			vs.		vs.
	mock10	1	1			Column H		abl lov unc and wt
	mock11	0.333333	3
	mock12	1	1			Mann Whitney test
	mock13	1	1			P value		0.8064
	mock14	1	1			Exact or approximate P value?		Exact
exp 3	mock15	1	1			P value summary		ns
	mock16	1	1			Significantly different (P < 0.05)?		No
	mock17	1	1			One- or two-tailed P value?		Two-tailed
	mock18	0.5	2			Sum of ranks in column G,H		972 , 798
	mock19	0.333333	3			Mann-Whitney U		420
	mock20	0.5	2
	mock21	1	1			Difference between medians
	mock22	1	1			Median of column G		1, n=32
	mock23	1	1			Median of column H		1, n=27
	mock24	1	1			Difference: Actual		0
exp 1	ablated 3	1	1			Difference: Hodges-Lehmann		0
	ablated 4	1	1
	ablated 5	0.333333	3
	ablated 6	0.333333	3
	ablated 7	1	1
exp 2	ablated 8	1	1
	ablated 9	1	1
	ablated 10	0.333333	3
	ablated 11	1	1
	ablated 12	0.333333	3
	ablated 13	1	1
	ablated 14	1	1
	ablated 15	0.5	2
exp 3	ablated 16	1	1
	ablated 17	1	1
	ablated 18	1	1
	ablated 19	1	1
	ablated 20	1	1

## Sheet: Fig. 7-F_M. Manoeuvre ablation
Movie number	Treatment	Total Nº of maneuvers	CONTINUOUS	STOP BEFORE BACK	STOP between F	Discontinuous Switch F-B	Mixture of discontinuity events
27 (exp 1)	mock 1	0								Treatment	Total Nº of maneuvers	CONTINUOUS	STOP BEFORE BACK	STOP between F	Discontinuous Switch F-B	Mixture of discontinuity events
28 (exp 1)	mock 2	1	1							MOCK	47	37	2	1	6	1
34 (exp 1)	mock3	2	2							ABLATED	51	19	11	1	5	15
36 (exp 1)	mock4	3	2		1
41 (exp 1)	mock5	2	1	1
44 (exp 1)	mock 6	0								Treatment	% of CONTINUOUS	% of STOP BEFORE BACK	% of STOP between F	% of Discontinuous Switch F-B	% of Mixture of discontinuity events
45 (exp 1)	mock 7	0								MOCK	78.7234	4.25532	2.12766	12.766	2.12766
1 (exp 2)	MOCK 8	0								ABLATED	37.2549	21.5686	1.96078	9.80392	29.4118
4 (exp 2)	MOCK 9	0
8 (exp 2)	MOCK 10	7	5			1	1
9 (exp 2)	MOCK 10	19	17			2
15 (exp 2)	MOCK 10	2	1			1
16 (exp 2)	MOCK 11	0								c2 test of continuous and discontinuous manoeuvres performed by mock ablated and PHD ablated animals
18 (exp 2)	MOCK 12	4	3	1						Chi-square
19 (exp 2)	MOCK 12	1	1							Chi-square, df	17,17, 1
22 (exp 2)	MOCK 13	4	3			1				z	4.144
23 (exp 2)	MOCK 13	0								P value	< 0,0001
27 (exp 2)	MOCK 14	0								P value summary	****
28 (exp 2)	MOCK 15	0								One- or two-tailed	Two-tailed
32 (exp 2)	MOCK 16	2	1			1				Statistically significant? (alpha<0.05)	Yes
33 (exp 2)	MOCK 16	0
34 (exp 2)	MOCK 17	0								Data analyzed	DISCONTINIOUS	CONTINIOUS	Total
2 (exp 3)	MOCK 18	0								MOCK	10	37	47
4 (exp 3)	MOCK 19	0								ABLATED	32	19	51
6 (exp 3)	MOCK 20	0								Total	42	56	98
7 (exp 3)	MOCK 21	0
26 (exp 1)	ablated 1	4	2	1		1
29 (exp 1)	ablated 2	0
31 (exp1)	ablated 3	0
37 (exp 1)	ablated 4	0
39 (exp 1)	ablated 5	5	5
40 (exp 1)	ablated 6	0
42 (exp 1)	ablated 7	0
43 (exp 1)	ablated 7	0
46 (exp 1)	ablated 8	0
48 (exp 1)	ablated 9	0
50 (exp 1)	ablated 9	0
2 (exp 2)	ABLATED 10	1	1
3 (exp 2)	ABLATED 11	0
6 (exp 2)	ABLATED 12	14	0	4	0	2	8
10 (exp 2)	ABLATED 13	0
11 (exp 2)	ABLATED 13	1	1
12 (exp 2)	ABLATED 13	2	2
13 (exp 2)	ABLATED 12	4				1	3
20 (exp 2)	ABLATED 14	0
21 (exp 2)	ABLATED 14	0
24 (exp 2)	ABLATED 15	0
25 (exp 2)	ABLATED 16	0
29 (exp 2)	ABLATED 17	0
31 (exp 2)	ABLATED 17	0
12 (exp 3)	ABLATED 18	2	2
16 (exp 3)	ABLATED 19	18	6	6	1	1	4
9 (exp 3)	ABLATED 20	0
10 (exp 3)	ABLATED 21	0
11 (exp 3)	ABLATED 22	0

## Sheet: Fig. 7-F_M.Manoeuvre silencing 
Movie number	Treatment	Total Nº of maneuvers	CONTINUOUS	STOP BEFORE BACK	STOP between F	Discontinuous Switch F-B	Mixture of discontinuities
35	ARRAY+ Histamine 1	0									Treatment	Total Nº of maneuvers	CONTINUOUS	STOP BEFORE BACK	STOP between F	Discontinuous Switch F-B	Mixture of discontinuities
37	ARRAY+ Histamine 2	3		1			2				ARRAY + HISTAMINE	23	1	5	3	5	9
42	ARRAY +HISTAMINE 3	1			1						HIM + HISTAMINE	34	17	5	7	3	2
46	ARRAY +HISTAMINE 4	3		1			2				ARRAY NO HISTAMINE	34	22	0	2	6	4
51	ARRAY +HISTAMINE 5	3	1		1		1
57	ARRAY +HISTAMINE 6	0
59	ARRAY +HISTAMINE 6	0									Treatment	% CONTINUOUS	% STOP BEFORE BACK	% STOP between F	% Discontinuous Switch F-B	% Mixture of discontinuities
60	ARRAY +HISTAMINE 7	3		2	1						ARRAY + HISTAMINE	4.34783	21.7391	13.0435	21.7391	39.1304
70	ARRAY +HISTAMINE 8	0									HIM + HISTAMINE	50	14.7059	20.5882	8.82353	5.88235
72	ARRAY +HISTAMINE 9	0									ARRAY NO HISTAMINE	64.7059	0	5.88235	17.6471	11.7647
83	ARRAY +HISTAMINE 10	0
84	ARRAY +HISTAMINE 10	0
87	ARRAY +HISTAMINE 11	8		1		4	3
97	ARRAY +HISTAMINE 12	0
98	ARRAY +HISTAMINE 13	2				1	1
38	HIM + histamine 1	1	1								c2 test of continuous and discontinuous manoeuvres performed by WT and PHD silenced animals
39	HIM + histamine 2	3	2			1					Chi-square
48	HIM + histamine 3	0									Chi-square, df	13,23, 1
49	HIM + histamine 4	0									z	3.638
50	HIM + histamine 4	2			1		1				P value	0.0003
55	HIM + histamine 5	7	4		1	1	1				P value summary	***
64	HIM + histamine 6	2			2						One- or two-tailed	Two-tailed
65	HIM + histamine 7	7	4	3							Statistically significant? (alpha<0.05)	Yes
82	HIM + histamine 8	11	6	1	3	1
85	HIM + histamine 9	0									Data analyzed	CONTINOUS MM	DISCONTINOUS MM	Total
86	HIM + histamine 9	0									WT	17	17	34
93	HIM + histamine 10	0									PHD silenced	1	22	23
94	HIM + histamine 11	1		1							Total	18	39	57
43	ARRAY NO HISTAMINE 1	0
45	ARRAY NO HISTAMINE 2	1			1
52	ARRAY NO HISTAMINE 3	8	4			3	1				c2 test of continuous and discontinuous manoeuvres performed by animals carrying the oig-8::HisCl channel extrachromosomal array +/- treatment.
53	ARRAY NO HISTAMINE 4	0									Chi-square
54	ARRAY NO HISTAMINE 5	12	7			3	2				Chi-square, df	20,77, 1
62	ARRAY NO HISTAMINE 6	13	11		1		1				z	4.557
80	ARRAY NO HISTAMINE 7	0									P value	< 0,0001
81	ARRAY NO HISTAMINE 8	0									P value summary	****
89	ARRAY NO HISTAMINE 9	0									One- or two-tailed	Two-tailed
											Statistically significant? (alpha<0.05)	Yes
											Data analyzed	CONTINOUS MM	DISCONTINOUS MM	Total
											Array +; His -	22	12	34
											PHD silenced	1	22	23
											Total	23	34	57
											c2 test of continuous and discontinuous manoeuvres performed by WT animals and animals carrying the oig-8::HisCl channel extrachromosomal array without treatment.
											Chi-square
											Chi-square, df	1,503, 1
											z	1.226
											P value	0.2202
											P value summary	ns
											One- or two-tailed	Two-tailed
											Statistically significant? (alpha<0.05)	No
											Data analyzed	CONTINOUS MM	DISCONTINOUS MM	Total
											WT	17	17	34
											array +; His -	22	12	34
											Total	39	29	68

## Sheet: Fig. 7-F_Ca2+ Molina manoeuvre
Time locked to the transtion from forward to backward during Molina manoeuvre
																												Plot 7C
Ca8	Ca10ab (1)	Ca10ab(2)	Ca10c (1)	Ca10c (2)	Ca10c (3)	Ca23(2)	Ca23(3)	Ca23(5)	Ca23(6)	Ca23(7)	Ca23(8)	Ca23(9)	Ca23(10)	Ca23(11)	Ca23(12)	Ca23(13)	Ca23(14)	Ca23(15)	14Dec16_14(1720-4051)	d14Dec16_5(2000-4846),	a14Dec16_12(2100-4520)	b14Dec16_12(2100-4520)	14Dec16_7
																												average	SEM	plus SEM	minus SEM
-0.888038	-1.43722	-1.7311	0.556377	-1.98153	-0.636814	-1.98137	-0.231828	-1.54547	-0.152796	-1.38722	0.185165	-0.967083	-0.334945	-1.48265	-1.65359	-1.12464	-0.296939	-1.22104	0.264982	-0.13772	-0.148881	0.22607	-0.0849671
-0.957831	-1.42534	-1.76979	0.546249	-1.77638	-0.605017	-2.001	-0.364536	-1.58762	-0.121858	-1.30602	0.158143	-0.986065	-0.360944	-1.61595	-1.64081	-1.09293	-0.170204	-1.1546	0.275662	-0.0605157	-0.151515	0.902567	-0.0849671					-0.758052	0.159477	-0.598575	-0.917528
-0.944502	-1.39795	-1.83402	0.558526	-1.67646	-0.655973	-1.86772	-0.228262	-1.59091	-0.127745	-1.26841	0.126806	-1.05093	-0.155547	-1.47102	-1.6103	-1.05347	-0.231487	-1.11861	0.303532	-0.0687515	-0.141834	0.925487	-0.0849671					-0.722969	0.168327	-0.554643	-0.891296
-0.933154	-1.33873	-1.87187	0.592114	-1.60335	-0.63642	-1.79859	-0.125988	-1.64232	-0.119439	-1.23336	0.108125	-0.984018	-0.305993	-1.52869	-1.59095	-1.14155	-0.328345	-1.06018	0.101786	-0.0383799	-0.142495	0.895713	-0.0849671					-0.694355	0.165826	-0.528529	-0.860181
-0.862144	-1.34514	-1.97415	0.590731	-1.54576	-0.643708	-1.77813	0.0330151	-1.52156	-0.128375	-1.1351	0.134688	-1.06548	-0.0530966	-1.65543	-1.63924	-1.20936	-0.290126	-0.977104	-0.0986473	-0.0292972	-0.132221	0.936276	-0.0849671					-0.700461	0.162149	-0.538311	-0.86261
-0.811483	-1.28982	-2.02057	0.601278	-1.49482	-0.576762	-1.62405	0.0842839	-1.38884	-0.129349	-1.02568	0.0670339	-1.17698	0.0136271	-1.21453	-1.68321	-1.14765	-0.460326	-1.00062	-0.237013	0.00102511	-0.135098	0.995906	-0.0849671					-0.68643	0.165218	-0.521212	-0.851648
-0.825255	-1.27718	-2.04087	0.636892	-1.44663	-0.581172	-1.44252	0.199265	-1.16708	-0.13327	-0.923156	0.0143796	-1.01897	-0.00360394	-0.939081	-1.52184	-1.26165	-0.497206	-0.973725	-0.317603	0.0135308	-0.119749	0.990553	-0.0849671					-0.655775	0.158976	-0.496799	-0.814751
-0.603805	-1.24368	-2.04941	0.622895	-1.43959	-0.578816	-1.34084	0.0917434	-0.979077	-0.130911	-0.845094	0.0210013	-0.965687	-0.0598105	-0.67154	-1.46942	-1.26377	-0.598464	-1.01563	-0.445573	0.0658779	-0.129526	0.902958	-0.0849671					-0.613371	0.152032	-0.461339	-0.765403
-0.516765	-1.19978	-2.02426	0.631712	-1.52493	-0.589671	-1.15872	-0.00316938	-0.791009	-0.12925	-0.774161	-0.0237506	-0.961733	-0.130273	-0.555238	-1.27894	-1.31331	-0.626184	-0.8976	-0.451801	0.0991418	-0.144097	0.762537	-0.0849671					-0.592131	0.144708	-0.447423	-0.736839
-0.366203	-1.19959	-1.99279	0.617421	-1.58681	-0.60253	-1.1039	-0.0804419	-0.740053	-0.125465	-0.745758	0.00668011	-1.02307	-0.24706	-0.269275	-1.25326	-1.34262	-0.662616	-0.890503	-0.375931	0.0723342	-0.156594	0.67971	-0.0849671					-0.570259	0.136494	-0.433765	-0.706754
-0.203226	-1.1764	-1.97067	0.605979	-1.61079	-0.491091	-1.09209	-0.0879212	-0.645776	-0.130177	-0.718818	0.046648	-0.915156	-0.409676	0.100922	-1.11443	-1.35254	-0.785651	-0.895303	-0.371323	0.114161	-0.177801	0.586743	-0.0849671					-0.561387	0.134657	-0.42673	-0.696045
-0.0724858	-1.15789	-1.97015	0.615137	-1.47971	-0.489764	-1.01186	-0.120625	-0.541931	-0.0899144	-0.683935	0.0245863	-0.858472	-0.400093	0.356786	-1.1237	-1.40271	-0.705624	-0.906512	-0.213157	0.157597	-0.196675	0.472205	-0.0849671					-0.532473	0.133893	-0.39858	-0.666366
-0.0389359	-1.12628	-1.90872	0.609776	-1.50353	-0.407622	-0.976973	-0.190249	-0.383441	-0.0758093	-0.693167	0.0434475	-0.727249	-0.652615	0.446486	-0.96027	-1.50115	-0.813415	-0.896637	-0.202051	0.158313	-0.217536	0.390441	-0.0849671					-0.495161	0.133709	-0.361452	-0.62887
-0.0979954	-1.084	-1.91415	0.622858	-1.45447	-0.50078	-1.02518	-0.116388	-0.295372	-0.0577411	-0.693325	0.0825836	-0.642805	-0.681794	0.0580502	-0.830303	-1.63153	-0.818063	-0.953955	-0.193045	0.19312	-0.242053	0.262854	-0.0849671					-0.488007	0.132467	-0.35554	-0.620473
-0.0192157	-1.05663	-1.91916	0.630522	-1.34439	-0.481267	-1.0555	-0.072355	-0.333263	-0.0526495	-0.67472	0.112178	-0.650807	-0.654325	-0.0513031	-0.829364	-1.66416	-0.661776	-0.956067	-0.054392	0.198893	-0.259773	0.180264	-0.0849671					-0.504102	0.128848	-0.375254	-0.632951
-0.237042	-1.01504	-1.94848	0.679858	-1.28033	-0.478849	-1.01522	-0.063977	-0.327463	-0.0877824	-0.642553	0.0994536	-0.724468	-0.645939	-0.137662	-0.886223	-1.77532	-0.633968	-0.925305	0.101031	0.220962	-0.258641	0.0682373	-0.0849671					-0.489759	0.12762	-0.362139	-0.617379
-0.249762	-0.98047	-1.95646	0.693706	-1.05284	-0.48838	-1.03327	0.0579103	-0.317034	-0.0989986	-0.629809	0.171006	-0.667341	-0.606171	-0.149539	-0.857639	-1.8083	-0.581017	-1.04507	0.0985975	0.232301	-0.246953	0.0237048	-0.0849671					-0.499988	0.128233	-0.371754	-0.628221
-0.273852	-0.885255	-1.96188	0.715234	-0.882073	-0.479844	-1.04349	0.217586	-0.354559	-0.0890502	-0.632633	0.165033	-0.672221	-0.593369	-0.150844	-0.691505	-1.90149	-0.585022	-1.09498	0.203287	0.247464	-0.245315	-0.016035	0.185451					-0.482367	0.128408	-0.353959	-0.610774
-0.378155	-0.863019	-1.97452	0.748169	-0.832764	-0.552463	-1.08073	0.146085	-0.403844	-0.0829621	-0.615324	0.103165	-0.672207	-0.499344	-0.660773	-0.736887	-1.93316	-0.484103	-0.936232	0.349548	0.251178	-0.231832	-0.0496358	0.157569					-0.450806	0.132578	-0.318228	-0.583385
-0.518724	-0.81953	-1.97343	0.728079	-0.757595	-0.55022	-1.06792	0.13384	-0.419579	-0.0829524	-0.612594	0.0967631	-0.838007	-0.39262	-0.822872	-0.672155	-2.01525	-0.495965	-0.940558	0.529693	0.198608	-0.211738	-0.0583232	0.139179					-0.46801	0.132067	-0.335943	-0.600077
-0.621382	-0.748223	-1.98494	0.731092	-0.646661	-0.576677	-1.20494	0.143566	-0.453092	-0.0713586	-0.620429	0.104881	-0.934215	-0.293582	-0.679503	-0.78299	-2.0268	-0.431432	-0.90222	0.542591	0.20657	-0.195787	-0.0219387	0.101123					-0.475995	0.135205	-0.34079	-0.6112
-0.608239	-0.710591	-1.93871	0.768602	-0.389262	-0.501209	-1.27514	0.0994883	-0.39954	-0.063102	-0.65323	0.13132	-0.960585	-0.123111	-0.604117	-0.833648	-2.00395	-0.366544	-0.798155	0.550311	0.158267	-0.165388	-0.0263848	0.0678869					-0.473598	0.137198	-0.336399	-0.610796
-0.570649	-0.714415	-1.87844	0.751651	-0.342681	-0.483613	-1.32271	0.134741	-0.417833	-0.0456328	-0.651859	0.173275	-1.06351	0.0427309	-0.616884	-0.94532	-1.98121	-0.280763	-0.769683	0.488308	0.175523	-0.160626	-0.0157567	0.0506616					-0.443543	0.136534	-0.307008	-0.580077
-0.496977	-0.722075	-1.81465	0.742716	-0.402305	-0.449795	-1.33755	0.115191	-0.442363	0.00792443	-0.640523	0.135284	-1.08744	0.1563	-0.620786	-0.921331	-1.94496	-0.155532	-0.781137	0.605896	0.15733	-0.153985	0.0615488	0.047707					-0.435196	0.13747	-0.297726	-0.572666
-0.55153	-0.716879	-1.82639	0.747181	-0.517954	-0.422231	-1.37743	0.0757528	-0.46977	0.0136091	-0.630581	0.0833899	-1.19418	0.336921	-0.622413	-1.05132	-1.88702	-0.142182	-0.764867	0.754858	0.138462	-0.156921	0.214462	0.0285674					-0.41423	0.138322	-0.275908	-0.552551
-0.380428	-0.746781	-1.77235	0.770874	-0.574246	-0.382964	-1.32881	0.0345021	-0.498018	0.00977769	-0.64675	0.0930508	-1.22086	0.522705	-0.771531	-1.17505	-1.80932	0.0219838	-0.674357	0.831373	0.122529	-0.149127	0.341821	0.00853351					-0.414103	0.14387	-0.270233	-0.557973
-0.258454	-0.687061	-1.69661	0.786286	-0.466448	-0.35072	-1.30114	0.0229238	-0.559447	0.0418004	-0.631928	0.081459	-1.30912	0.525559	-0.771966	-1.33733	-1.72438	-0.0324065	-0.763119	0.699996	0.128103	-0.141332	0.432378	-0.0160775					-0.39056	0.147469	-0.243092	-0.538029
-0.201835	-0.585386	-1.66023	0.81676	-0.559244	-0.281453	-1.2805	0.0146349	-0.561503	0.043248	-0.565648	0.0717912	-1.27713	0.543895	-0.845369	-1.23987	-1.61831	0.0419337	-0.714145	0.585036	0.140103	-0.131796	0.518335	-0.0265949					-0.38871	0.146233	-0.242477	-0.534943
-0.147523	-0.58079	-1.64444	0.837792	-0.534801	-0.294858	-1.16309	-0.0379744	-0.578547	0.0478267	-0.483632	-0.00266443	-1.31521	0.544145	-0.915795	-1.30628	-1.52249	0.104071	-0.726224	0.535184	0.132305	-0.129331	0.502973	-0.0424778					-0.365553	0.142616	-0.222937	-0.508169
0.0732774	-0.567762	-1.63111	0.859257	-0.593175	-0.282964	-1.10798	-0.0743637	-0.663086	0.0489271	-0.422945	-0.0484467	-1.24831	0.486611	-1.03714	-1.35082	-1.45748	0.176864	-0.72367	0.588235	0.129206	-0.1251	0.531293	-0.0590348					-0.36341	0.140468	-0.222942	-0.503878
-0.0970507	-0.523776	-1.65529	0.851306	-0.620923	-0.310753	-1.08405	-0.129137	-0.627672	0.0553355	-0.361714	-0.0987902	-1.10607	0.427369	-1.04995	-1.34053	-1.36668	0.100987	-0.635048	0.782938	0.0979281	-0.116407	0.573763	-0.0886662					-0.354155	0.141414	-0.21274	-0.495569
-0.21708	-0.461882	-1.66861	0.845584	-0.542177	-0.344174	-1.04722	-0.151933	-0.574208	0.0571606	-0.347125	-0.0745467	-0.973833	0.509573	-1.042	-1.38387	-1.15594	0.210778	-0.520025	0.582582	0.0571951	-0.0967392	0.645775	-0.110661					-0.346787	0.138766	-0.208021	-0.485553
-0.159647	-0.383959	-1.59407	0.871567	-0.447713	-0.316257	-1.01875	-0.142876	-0.500841	0.0732549	-0.349711	-0.0677376	-0.994266	0.413842	-1.03274	-1.40762	-1.04276	0.211872	-0.403108	0.442609	0.0666347	-0.0772348	0.585065	-0.106287					-0.325141	0.133588	-0.191553	-0.458729
-0.304104	-0.249177	-1.58604	0.837469	-0.334081	-0.350782	-1.0129	-0.174373	-0.458115	0.0684319	-0.330608	-0.12193	-0.906679	0.319733	-0.974293	-1.32429	-0.871652	0.0985821	-0.418663	0.293379	0.0776918	-0.0858154	0.516569	-0.0984579					-0.30753	0.127719	-0.179811	-0.435249
-0.245307	-0.243702	-1.61578	0.819055	-0.344227	-0.30965	-0.998901	-0.26105	-0.361089	0.0511721	-0.319312	-0.0740883	-0.771606	0.371285	-0.879253	-1.29129	-0.752708	0.19537	-0.425427	0.573064	0.0494324	-0.0741099	0.480892	-0.0809173					-0.307921	0.117881	-0.19004	-0.425801
-0.222076	-0.30114	-1.62899	0.802269	-0.250175	-0.337312	-0.993058	-0.322578	-0.247455	0.0436409	-0.26681	-0.0297247	-0.667276	0.303367	-0.846275	-1.35155	-0.569584	0.162593	-0.394651	0.698004	0.0364673	-0.081522	0.465417	-0.0791227					-0.271173	0.118011	-0.153162	-0.389184
-0.217441	-0.209145	-1.50037	0.778057	-0.256186	-0.317632	-0.924841	-0.368893	-0.15649	-0.00110476	-0.210945	-0.0122058	-0.576504	0.364275	-0.934302	-1.2555	-0.511431	0.121183	-0.393265	0.932656	0.0221352	-0.0773098	0.504085	-0.062615					-0.253231	0.117351	-0.13588	-0.370582
-0.430835	-0.195124	-1.43038	0.71886	-0.320364	-0.328802	-0.87727	-0.387326	-0.0405485	-0.00349703	-0.148055	0.0204672	-0.565884	0.384122	-0.880996	-1.24626	-0.325458	0.0965974	-0.410968	1.07461	-0.00594477	-0.0927352	0.569195	-0.0670283					-0.219325	0.116536	-0.102789	-0.335861
-0.267346	-0.13059	-1.31001	0.671242	-0.333456	-0.30338	-0.854108	-0.390102	0.0243047	0.00250632	-0.108754	0.0624484	-0.652922	0.393088	-0.957474	-1.15527	-0.289676	0.0461547	-0.431366	0.943629	-0.00912323	-0.100652	0.597849	-0.0378503					-0.203901	0.116664	-0.087237	-0.320565
-0.223271	-0.169424	-1.18896	0.599797	-0.327445	-0.26124	-0.849891	-0.40902	-0.0660071	-0.0166911	-0.0343924	0.0812593	-0.736423	0.285555	-0.969111	-1.18154	-0.239876	-0.0419248	-0.402789	1.18407	0.0163121	-0.120548	0.525675	-0.0374311					-0.191286	0.111311	-0.0799754	-0.302597
-0.124283	-0.174237	-1.13246	0.540035	-0.481937	-0.241718	-0.788892	-0.46276	-0.125694	-0.0213061	-0.0166435	0.120985	-0.628186	0.27671	-0.924959	-1.07514	-0.0761767	-0.0988451	-0.402118	1.22141	0.0151766	-0.132512	0.519001	-0.0559194					-0.190972	0.112017	-0.0789543	-0.302989
-0.114061	-0.217976	-1.01395	0.495993	-0.645524	-0.186595	-0.818095	-0.524073	-0.165836	-0.0162769	0.0510963	0.173652	-0.577469	0.370911	-0.919316	-1.07699	-0.110284	-0.076138	-0.330133	1.47049	0.00582075	-0.103109	0.553159	-0.0752853					-0.177936	0.108161	-0.0697749	-0.286097
-0.214995	-0.234039	-0.851437	0.440166	-0.612504	-0.210047	-0.787828	-0.532963	-0.153684	-0.00855097	0.139096	0.168995	-0.655209	0.38837	-1.01818	-0.941361	-0.0481712	-0.218497	-0.317003	1.47633	0.0191865	-0.101859	0.607298	-0.0949979					-0.160416	0.114665	-0.0457514	-0.275081
-0.159393	-0.237934	-0.624343	0.353803	-0.695153	-0.219308	-0.753197	-0.504041	-0.284777	-0.00808835	0.155481	0.149079	-0.748784	0.469978	-0.960324	-0.876216	-0.135634	-0.19919	-0.302856	1.50682	0.0378562	-0.0792365	0.664259	-0.121229					-0.156745	0.112967	-0.0437782	-0.269712
-0.0909875	-0.33533	-0.532802	0.294994	-0.678684	-0.21929	-0.702028	-0.459074	-0.302925	0.0211522	0.206526	0.188486	-0.762434	0.405581	-0.859076	-0.945548	0.0149328	-0.192508	-0.261169	1.68089	0.0497704	-0.0693755	0.675566	-0.127252					-0.148851	0.111788	-0.037063	-0.260639
0.00358636	-0.248239	-0.420771	0.238082	-0.771816	-0.245568	-0.72311	-0.447015	-0.384307	0.0432544	0.262059	0.189078	-0.723891	0.314259	-0.733359	-0.822537	0.0762224	-0.21698	-0.190345	1.66498	0.0882157	-0.0518363	0.619867	-0.133255					-0.125025	0.114878	-0.0101463	-0.239903
-0.147859	-0.232282	-0.314495	0.182031	-0.719815	-0.262993	-0.674463	-0.399277	-0.401494	0.0499552	0.282164	0.180045	-0.59522	0.27714	-0.612075	-0.877608	0.142061	-0.152759	-0.156168	1.67247	0.0918844	-0.0389797	0.558699	-0.146698					-0.108893	0.110594	0.00170126	-0.219487
-0.108327	-0.127809	-0.243235	0.133026	-0.742316	-0.266526	-0.624393	-0.365658	-0.322651	0.0727463	0.295523	0.182867	-0.463051	0.317379	-0.51167	-0.649779	0.0970544	-0.181998	-0.145025	1.64608	0.108438	-0.0122331	0.568106	-0.0705239					-0.0956556	0.106387	0.0107313	-0.202042
-0.2346	-0.165117	-0.140624	0.0737925	-0.5818	-0.279338	-0.614686	-0.331515	-0.273612	0.0703464	0.382487	0.166433	-0.455931	0.310146	-0.41381	-0.578139	0.0411213	-0.130021	-0.145057	1.83035	0.111047	-0.00250693	0.593178	-0.0567639					-0.0589157	0.0998829	0.0409672	-0.158799
-0.241442	-0.171126	-0.111326	0.0116843	-0.403871	-0.303518	-0.499955	-0.25726	-0.264468	0.0770925	0.458068	0.137619	-0.490979	0.251607	-0.349192	-0.443054	0.102116	-0.0874291	-0.126725	1.6107	0.131742	0.00531321	0.571115	-0.057762					-0.034359	0.102519	0.0681604	-0.136878
-0.238635	-0.145043	-0.104444	-0.0307461	-0.386401	-0.312628	-0.467338	-0.288416	-0.239119	0.0710329	0.474299	0.11857	-0.377004	0.202654	-0.392601	-0.412343	-0.00372696	-0.00859876	-0.121461	1.31896	0.132518	0.0101781	0.54496	-0.0427182					-0.0187938	0.0909264	0.0721326	-0.10972
-0.281563	-0.146341	-0.135758	-0.0417931	-0.194815	-0.233621	-0.432015	-0.319216	-0.193935	0.0677725	0.438247	0.110702	-0.22304	0.149005	-0.282247	-0.379119	0.0447492	-0.0624552	-0.0984297	1.02995	0.127859	-0.00332723	0.480715	-0.0174526					-0.0290855	0.0795855	0.0505	-0.108671
-0.304831	-0.149811	-0.108358	-0.0654783	-0.243835	-0.154493	-0.44348	-0.393955	-0.248216	0.100886	0.423778	0.0673054	-0.134686	0.106227	-0.260751	-0.31149	-0.0415712	0.0128921	-0.0828993	0.674604	0.142815	-0.0109448	0.392449	-0.00489828					-0.0248386	0.0652775	0.0404389	-0.0901161
-0.380572	-0.145071	-0.138275	-0.0814565	0.0717342	-0.118128	-0.371104	-0.476907	-0.220034	0.0883179	0.373898	0.0100018	-0.0853558	0.103089	-0.251169	-0.289249	-0.137428	0.0295281	-0.0441493	0.528147	0.132174	-7.59432e-05	0.354575	0.0357605					-0.043281	0.0540016	0.0107206	-0.0972825
-0.377332	-0.163497	-0.151432	-0.0541504	0.164308	-0.0983296	-0.28424	-0.520846	-0.186025	0.0768793	0.377034	-0.0630459	-0.0961464	0.114879	-0.199833	-0.0849222	-0.0417901	-0.0210713	-0.0303257	0.454438	0.114831	0.00927074	0.337937	0.0535485					-0.0421562	0.049244	0.00708778	-0.0914002
-0.254377	-0.222679	-0.069137	-0.031814	0.19211	-0.0833821	-0.247719	-0.551096	-0.166425	0.0761053	0.322726	-0.0662798	-0.170009	0.0887164	-0.230248	-0.0623024	-0.0474469	0.0184161	-0.00280519	0.257697	0.096084	0.000814561	0.276994	0.0161111					-0.0279109	0.045856	0.017945	-0.0737669
-0.109067	-0.103853	-0.0508539	-0.00840025	0.163258	-0.0549102	-0.20862	-0.470208	-0.126382	0.072763	0.258081	-0.0688787	-0.129443	0.0534863	-0.340514	-0.0635578	-0.102623	0.0257376	-0.00540212	-0.00745891	0.0700886	0.00635932	0.19804	0.0205402					-0.0358311	0.0401257	0.00429461	-0.0759568
0.00608528	-0.129959	-0.0554384	0.0112215	0.128831	-0.0358684	-0.128273	-0.391934	-0.0908504	0.0538766	0.209089	-0.0595316	-0.0454059	-0.0141265	-0.229242	-0.0825741	-0.0897815	0.00400623	-0.0136596	-0.0670945	0.029467	0.00599069	0.145528	0.0145616					-0.0409091	0.0320586	-0.00885051	-0.0729677
0.0146784	-0.125884	0.0114075	0.0102215	0.0135506	-0.00846615	-0.0815593	-0.244476	-0.0862462	0.00982615	0.134409	-0.0613801	-0.0354276	-0.0313237	-0.0419747	0.0131787	-0.0517262	0.0341054	-0.0194779	-0.0234234	0.0202375	0.00402881	0.0665185	0.012745					-0.0343784	0.0246233	-0.0097551	-0.0590017
0.080052	-0.0876142	0.0620883	-0.00288652	-0.0363171	0.00536926	-0.068341	-0.109813	-0.0462501	0.0242771	0.0933003	-0.0387977	-0.00654885	-0.0387618	-0.0580445	0.10151	-0.0496983	0.139995	0.00323687	-0.0229108	0.0330997	-0.00374128	0.0150459	0.0064965					-0.0194357	0.0145698	-0.00486597	-0.0340055
0	0	0	0	0	0	0	0	0	0	0	0	0	0	0	0	0	0	0	0	0	0	0	0					-0.000218902	0.0126353	0.0124164	-0.0128542
0.0701296	-0.0735494	0.023684	-0.0292962	-0.153547	0.0217916	0.0319292	0.195922	0.0219805	-0.00402148	-0.0126689	0.0401919	-0.0214509	-0.0133849	-0.139889	0.0234031	0.0346635	0.0498764	-0.0283879	-0.0804476	0.0159025	-0.0120666	-0.00237358	-0.0230447					0	0	0	0
0.149764	0.177181	0.0222925	-0.051157	-0.189709	0.0556226	-0.0157804	0.320282	-0.0425528	-0.0315665	-0.0918033	0.101326	-0.136905	-0.0598703	-0.0448727	-0.0491607	-0.100676	0.111207	-0.0322605	-0.0725332	0.0505501	-0.0168585	0.00597098	-0.0171978					-0.00269392	0.0141111	0.0114172	-0.016805
0.0996325	0.282249	-0.0873733	-0.0980761	-0.165089	0.091239	-0.0106331	0.468874	-0.0816653	-0.0482283	-0.0145327	0.106121	-0.144555	-0.0459766	0.0695424	-0.129114	-0.00302162	0.111098	-0.00263665	-0.0882638	0.061464	-0.0299137	0.00944188	-0.0447991					0.00172051	0.0224777	0.0241983	-0.0207572
-0.0923948	0.28431	-0.243454	-0.140186	-0.121598	0.10878	0.0112703	0.498356	-0.186955	-0.04473	0.00163908	0.106689	-0.0894401	0.0812519	0.262393	-0.204531	-0.0618186	0.0691692	0.0247103	0.0981202	0.109974	-0.0281343	0.0166898	-0.0631354					0.012741	0.0285583	0.0412993	-0.0158173
-0.198774	0.335229		-0.10947	-0.134441	0.0950331	-0.0268856	0.55206	-0.275936	-0.0252019	-0.0129661	0.118912	-0.104911	0.0976341	0.0489152	-0.1536	-0.121452	0.100729	0.12074	0.0518544	0.154937	-0.0422081	0.0247801	-0.0698406					0.0165407	0.0342142	0.0507549	-0.0176736
-0.300432	0.416666		-0.168876	-0.166047	0.0784362	-0.0382412	0.618553	-0.391725	0.019252	-0.0363964	0.103698	-0.166046	0.0740031	0.0378291	-0.198361	-0.0652513	0.174175	0.215448	-0.00968513	0.212642	-0.0664091	0.0405352	-0.0674914					0.0184843	0.0363947	0.0548789	-0.0179104
-0.363153	0.339295		-0.205619	-0.362262	0.0487029	-0.0171778	0.684834	-0.458992	-0.016965	0.0527717	0.0999148	-0.370552	0.097577	-0.0248388	-0.270505	-0.00587449	0.0636433	0.259948	0.19002	0.176336	-0.0848729	0.0410673	-0.045566					0.0137511	0.0452693	0.0590205	-0.0315182
-0.288806	0.294554		-0.266146	-0.496176	0.000773098	-0.0405858	0.741159	-0.467936	-0.0307265	0.153422	0.0949897	-0.380812	0.0837097	-0.170955	-0.185603	0.0918455	0.138304	0.282938	0.245863	0.204274	-0.100154	0.0968674	-0.029367					-0.00748994	0.0530231	0.0455332	-0.060513
-0.35279	0.343768		-0.286715	-0.626964	-0.0213859	-0.0783462	0.752771	-0.454999	-0.0541439	0.206218	0.0857476	-0.337924	0.118597	-0.0925442	-0.0636631	0.04723	0.241065	0.337926	0.513283	0.213198	-0.132622	0.161023	-0.00445341					-0.00124205	0.0573341	0.0560921	-0.0585762
-0.440358	0.102177		-0.314963	-0.688966	0.00990762	-0.106162	0.676622	-0.390003	-0.0392375	0.169696	0.0791999	-0.235241	0.126839	-0.295012	-0.0316904	0.127222	0.25304	0.346461	0.531151	0.215041	-0.149682	0.222009	-0.00450541					0.0223597	0.0646445	0.0870042	-0.0422848
-0.578362	0.0483489		-0.320677	-0.550853	0.0438548	-0.181722	0.648662	-0.288458	-0.0386727	0.030688	0.0676515	-0.0693558	0.142914	-0.29285	0.101942	0.0426234	0.288739	0.352989	0.585063	0.253431	-0.157621	0.249711	0.0201569					0.00711061	0.0644593	0.0715699	-0.0573487
-0.644764	0.00287776		-0.326291	-0.595302	0.08211	-0.212678	0.670013	-0.202452	-0.0562091	0.0276446	0.0686494	-0.0557429	0.0588152	-0.249562	0.26284	0.119117	0.271265	0.378077	0.685963	0.266136	-0.200088	0.286896	0.0844996					0.0173132	0.0631644	0.0804776	-0.0458511
-0.680605	0.0729291		-0.370888	-0.541779	0.152214	-0.285593	0.677014	-0.147408	-0.0892864	-0.0715933	0.0657418	-0.037432	0.0273127	-0.0548764	0.240712	0.149569	0.278587	0.41434	0.863765		-0.176531	0.361346	0.131539					0.0313833	0.0680203	0.0994036	-0.0366371
-0.689498	0.142423		-0.29478	-0.303465	0.243135	-0.406143	0.690682	-0.100789	-0.0782386	-0.0957066	0.0713857	-0.0194394	0.0351281	-0.0145016	0.145192	0.189562	0.256	0.28402	0.912817		-0.195084	0.430313	0.155507					0.0445035	0.073423	0.117927	-0.0289195
-0.765275	0.254459		-0.229067	-0.111989	0.279465	-0.467936	0.673819	-0.0738177	-0.0522803	-0.134719	0.0684831	0.13676	-0.062409	0.163642	0.301676	0.132729	0.325788	0.275547	0.73085		-0.17554	0.480211	0.145566					0.0617509	0.0719213	0.133672	-0.0101704
-0.844306	0.310426		-0.133155	0.0379066	0.358709	-0.569135	0.728565	-0.0631354	-0.0577442	-0.198199	0.0370082	0.206423	-0.0270197	0.380681	0.489801	-0.0551544	0.403246	0.345025	0.612134		-0.1814	0.4735	0.141994					0.0861801	0.0702873	0.156467	0.0158928
-0.85138	0.273645		-0.0140722	0.143387	0.396047	-0.577032	0.752384	-0.158503	-0.0856609	-0.242393	0.0818886	0.277288	-0.0321024	0.487388	0.454091	0.0262148	0.292906	0.330882	0.357388		-0.159388	0.452517	0.118649					0.108917	0.0766663	0.185583	0.0322506
-0.865022	0.231628		0.0414892	0.206153	0.438524	-0.603432	0.872087	-0.215509	-0.0901517	-0.134402	0.107593	0.393784	-0.0724275	0.75412	0.414102	0.0720949	0.310407	0.322328	0.339602		-0.170366	0.453273	0.131293					0.105643	0.0747644	0.180407	0.0308784
-0.880527	0.161582		0.156598	0.168841	0.396864	-0.542784	0.919402	-0.364988	-0.0987854	-0.0380981	0.188423	0.371076	-0.112213	0.811142	0.281551	0.0576189	0.218687	0.315526	0.169856		-0.172323	0.507801	0.138065					0.133508	0.081245	0.214753	0.0522627
-0.728715	0.155672		0.256413	0.111122	0.523985	-0.633257	0.999342	-0.457005	-0.0991205	-0.0212658	0.251976	0.37616	-0.122835	0.693147	0.192533	0.0421817	0.34621	0.355897	-0.108389		-0.154875	0.571325	0.0952497					0.120605	0.0819417	0.202547	0.0386634
-0.822503	0.029692		0.355662	-0.0739717	0.540167	-0.679934	0.973156	-0.494804	-0.105892	0.0628311	0.268521	0.391124	-0.0791872	0.664753	0.154571	0.000546514	0.384303	0.287338	-0.306765		-0.198822	0.552839	0.0718297					0.120261	0.0840942	0.204356	0.0361672
-0.811858	-0.168206		0.401065	-0.323597	0.536851	-0.656411	0.863571	-0.309159	-0.125513	0.0972722	0.340006	0.438394	-0.0199165	0.658039	0.197904	-0.0916241	0.361229	0.394961	-0.415226		-0.122541	0.517907	0.0581413					0.0897933	0.088677	0.17847	0.00111633
-0.771798	-0.16722		0.481481	-0.512747	0.594652	-0.690108	0.778912	-0.405514	-0.134239	0.0744732	0.417598	0.472767	0.0304958	0.539069	0.0587333	-0.11689	0.440941	0.363316	-0.496493		-0.157568	0.539665	0.0538514					0.0827858	0.0881971	0.170983	-0.00541132
-0.718466	-0.248506	-2.02347	0.492763	-0.689389	0.614423	-0.638238	0.78282	-0.654316	-0.128674	0.0269343	0.478336	0.424336	0.0444364	0.471293	-0.0750549	-0.0714566	0.422178	0.318022	-0.527068		-0.177519	0.574605	0.0621418					0.0633352	0.0918435	0.155179	-0.0285083
-0.734706	-0.182126	-2.02347	0.503872	-0.897663	0.744156	-0.676319	0.746281	-0.787515	-0.0810731	-0.0115098	0.494251	0.348804	0.066627	0.469404	-0.211545	-0.0896729	0.430863	0.321758	-0.623218		-0.201176	0.610719	0.0933664					-0.0539075	0.128581	0.0746737	-0.182489
-0.703909	-0.159494	-2.02347	0.573667	-1.13008	0.84748	-0.685507	0.737575	-0.70255	-0.0747718	-0.0937368	0.489956	0.323517	0.199507	0.328838	-0.263998	-0.191416	0.400161	0.375723	-0.751807		-0.196352	0.627884	0.081704					-0.0734738	0.134398	0.0609245	-0.207872
-0.6509	-0.0449859	-2.02347	0.574833	-1.48747	0.908992	-0.68757	0.754828	-0.787486	-0.0653	-0.123609	0.462432	0.264525	0.213964	0.182761	-0.314005	-0.193084	0.418944	0.351121	-0.798677		-0.204528	0.63658	0.0785446					-0.0865687	0.138922	0.0523531	-0.225491
-0.695873	-0.0286034	-2.02347	0.579071	-1.44428	0.872176	-0.566116	0.677968	-0.851213	-0.0614127	-0.184369	0.440424	0.196332	0.279452	0.168565	-0.395345	-0.246973	0.309989	0.31664	-0.897084		-0.230073	0.70393	0.107542					-0.110155	0.145492	0.035337	-0.255647
-0.618724	-0.0493972	-2.02347	0.541059	-1.5137	0.904744	-0.460009	0.686075	-0.976467	-0.0389865	-0.258329	0.456909	0.176183	0.278041	0.0990449	-0.458556	-0.254344	0.205086	0.283785	-0.958979		-0.234857	0.773094	0.14281					-0.129249	0.144551	0.015302	-0.2738
-0.569283	0.0271361	-2.02347	0.510677	-1.40965	0.904706	-0.356748	1.25861	-1.30263	-0.0457869	-0.269531	0.425729	0.139817	0.237058	0.0203824	-0.564394	-0.307666	0.182226	0.258074	-1.00603		-0.305331	0.831973	0.161196					-0.143434	0.147104	0.00366994	-0.290539
-0.653079	0.0454009	-2.02347	0.492002	-1.47802	0.879947	-0.236858	1.3023	-1.35976	-0.056983	-0.289366	0.441628	0.0994078	0.251821	-0.0120138	-0.595319	-0.324744	0.0614262	0.258678	-1.09745	-0.214956	-0.29915	0.85966	0.162697					-0.139258	0.15758	0.0183216	-0.296839
-0.810121	0.0500384	-2.02347	0.501981	-1.63082	0.858477	-0.15341	1.2764	-1.21361	-0.0524946	-0.273253	0.479087	0.0312205	0.293574	0.00364086	-0.624658	-0.342124	0.0742338	0.250141	-1.17129	-0.272317	-0.214067	0.865674	0.130271					-0.157759	0.157618	-0.000141021	-0.315377
-0.960053	-0.00116197	-2.02347	0.404263	-1.72693	0.808256	-0.0427938	1.28401	-1.20603	-0.0720778	-0.281945	0.478243	0.0168416	0.287113	-0.0156726	-0.599272	-0.439248	0.0652112	0.249138	-1.16211	-0.27059	-0.214416	0.885221	0.109691					-0.165288	0.159787	-0.00550105	-0.325074
-1.08764	0.0123685	-2.02347	0.366125	-1.76123	0.691623	0.0993026	1.23887	-1.4723	-0.0951274	-0.280552	0.519071	-0.115725	0.233534	-0.019119	-0.587103	-0.49594	0.0381557	0.216374	-1.12106	-0.275528	-0.203186	0.946932	0.134252					-0.184491	0.161388	-0.0231033	-0.345879
-2.56717	-0.103365	-2.02347	0.447626	-1.61851	0.698802	0.20952		-1.49397	-0.123276	-0.272894	0.53621	-0.164831	0.213092	0.00914948	-0.539754	-0.56561	0.00806299	0.23861	-1.13887	-0.264106	-0.162145	0.977885	0.147364					-0.210058	0.164802	-0.0452562	-0.37486
-2.56717	-0.26698	-2.02347	0.42766	-1.70952	-1.0849	0.0762124		-1.50906	-0.145301	-0.245975	0.566646	-0.197135	0.133057	0.0184874	-0.555263	-0.609077	0.0051547	0.260703	-1.11264	-0.253689	-0.140831	0.906355	0.179736					-0.328333	0.180918	-0.147415	-0.509251
-2.56717	-0.294054	-2.02347	0.447625	-1.77531	-1.0849	0.106924		-1.43277	-0.141613	-0.232759	0.627159	-0.229044	0.121395	0.0315091	-0.534666	-0.648411	0.00827482	0.317598	-1.0427	-0.254668	-0.143412	0.898434	0.188858					-0.428131	0.176679	-0.251452	-0.604809
-2.56717	-0.29012	-2.02347	0.444901	-2.11646	-1.0849	0.231588		-1.48682	-0.127013	-1.46714	0.67844	-0.264985	0.12448	0.0479539	-0.512332	-0.62621	0.00160593	0.334402	-0.955127	-0.26368	-0.16264	0.899294	0.192998					-0.419877	0.177639	-0.242238	-0.597516
-2.56717	-0.426797	-2.02347	0.380903	-2.30463	-1.0849	0.363962		-1.48572	-0.10954	-1.46714	0.656144	-0.263261	0.114629	0.0678559	-0.587192	-0.550459	0.0038608	0.369738	-0.818271	-0.294576	-0.123827	0.942373	0.250139					-0.477931	0.189515	-0.288415	-0.667446
-2.56717	-0.418398	-2.02347	0.328033	-2.25977	-1.0849	0.360544		-1.60015	-0.111628	-1.46714	0.637901	-0.229205	0.00974954	0.0383212	-0.593766	-0.542821	-0.0523678	0.40026	-0.756777	-0.332005	-0.202282	0.946786	0.309147					-0.476406	0.193653	-0.282754	-0.670059
																												-0.48744	0.19277	-0.29467	-0.680209

[truncated: 3 more sheets: Fig. 7-G_Vulva displacement, Fig. 7-H_Spicule insertion, Fig. 7-H_Ca2+ spicule insertion]
