# Supplementary material for: Direct glia-to-neuron transdifferentiation gives rise to a pair of male-specific neurons that ensure nimble male mating
Source: eLife. 2020 Nov 3;9:e48361. doi: 10.7554/eLife.48361 (PMC7609048; doi:10.7554/eLife.48361)
Supplement: Supplementary file 1. — A table indicating the quantification of pre-synaptic inputs and post-synaptic outputs of the PHD neurons as derived from the electron microscopy serial reconstruction (see Materials and methods). The number of synapses and number of sections over which synapses are observed for each input/output neuron are indicated. [file elife-48361-supp1.xlsx]

## Sheet: Sheet 1 - Supplementary File 1
Supplementary File 1
Presynaptic cell	Postsynaptic cell	# Synapses	# Sections	Type
PHDL	PHDR	4	5	electrical
PHDL	R4BL	2	4	electrical
PHDL	R2BL	1	1	electrical
PHDL	EF3	17	56	chemical
PHDL	PVNL	3	15	chemical
PHDL	PGA	4	12	chemical
PHDL	R4BR	4	9	chemical
PHDL	PVY	3	9	chemical
PHDL	EF1	4	8	chemical
PHDL	R9AR	2	5	chemical
PHDL	PHDR	2	4	chemical
PHDL	unk3028	1	4	chemical
PHDL	PDB	2	3	chemical
PHDL	R8BR	1	3	chemical
PHDL	CP08	1	3	chemical
PHDL	[CP01]	1	3	chemical
PHDL	unk5652	1	2	chemical
PHDL	PVV	1	2	chemical
PHDL	unk2979	1	2	chemical
PHDL	unk3005	2	2	chemical
PHDL	DX3	1	2	chemical
PHDL	CP09	1	2	chemical
PHDL	PVX	1	2	chemical
PHDL	unk3002	1	2	chemical
R8BL	PHDL	5	18	chemical
PHDR	PHDL	2	13	chemical
R3BR	PHDL	3	6	chemical
R2BL	PHDL	2	6	chemical
unk3028	PHDL	2	4	chemical
R9AR	PHDL	2	3	chemical
R9AL	PHDL	2	3	chemical
R8BR	PHDL	2	3	chemical
R7AR	PHDL	1	2	chemical
PDB	PHDL	1	2	chemical
HOB	PHDL	1	2	chemical
PCAL	PHDL	1	1	chemical
PHDR	PHDL	4	5	electrical
PHDR	PCCR	1	1	electrical
PHDR	PVNR	1	1	electrical
PHDR	R2BL	1	1	electrical
PHDR	EF1	16	62	chemical
PHDR	PVNR	4	29	chemical
PHDR	EF2	5	28	chemical
PHDR	EF3	4	19	chemical
PHDR	PVNL	3	17	chemical
PHDR	PHDL	2	13	chemical
PHDR	PVV	6	11	chemical
PHDR	[R7BL]	2	11	chemical
PHDR	PVX	4	7	chemical
PHDR	R8BR	4	7	chemical
PHDR	R2BL	2	6	chemical
PHDR	unk2581[EFn]	3	5	chemical
PHDR	PCCR	2	4	chemical
PHDR	R9AR	2	3	chemical
PHDR	R4BR	2	3	chemical
PHDR	SPDR	1	2	chemical
PHDR	R7BR	2	2	chemical
PHDR	R2BR	1	2	chemical
PHDR	SPVR	1	2	chemical
PHDR	R9AL	1	1	chemical
PHDR	R8BL	1	1	chemical
PHDR	R8AR	1	1	chemical
PVNL	PHDR	2	14	chemical
R2BL	PHDR	3	12	chemical
R8BR	PHDR	4	7	chemical
R9AR	PHDR	2	6	chemical
PHDL	PHDR	2	4	chemical
R8BL	PHDR	2	3	chemical
R3BR	PHDR	1	1	chemical
R4BR	PHDR	1	1	chemical
R9BR	PHDR	1	1	chemical
